# Supplementary material
Source: Royal Society of Chemistry journal article supplement (doi:10.1039/d6md00194g)
Supplement: d6md00194g1.pdf [file d6md00194g1.pdf]

**A new class of Indole-based HDAC8 inhibitors as potential anti-lung cancer agents:  
*In silico* design, synthesis, biological assessment and binding interaction analysis**

Samima Khatun<sup>1</sup>, Venkatesh Muthukumar<sup>2</sup>, Ambati Himaja<sup>2</sup>, Indrasis Dasgupta<sup>1</sup>, Kalpataru Das<sup>3</sup>, Balaram Ghosh<sup>2,\*</sup>, Shovanlal Gayen<sup>1,\*</sup>

<sup>1</sup>*Laboratory of Drug Design and Discovery, Department of Pharmaceutical Technology, Jadavpur University, Kolkata, 700032, West Bengal, India.*

<sup>2</sup>*Epigenetic Research Laboratory, Department of Pharmacy, Birla Institute of Technology and Science-Pilani, Hyderabad Campus, Shamirpet, Hyderabad, 500078, India.*

<sup>3</sup>*Department of Chemistry, Dr. Harisingh Gour University (A Central University), Sagar, 470003, (MP) India*

---

**Keywords:** HDAC8 inhibitor; Molecular fingerprints; Molecular docking; Molecular dynamic simulation; Apoptosis, Solid tumor.

\*Corresponding authors: Balaram Ghosh ([balaram@hyderabad.bits-pilani.ac.in](mailto:balaram@hyderabad.bits-pilani.ac.in)) and S. Gayen ([shovanlal.gayen@gmail.com](mailto:shovanlal.gayen@gmail.com); [sgayen.pharmacy@jadavpuruniversity.in](mailto:sgayen.pharmacy@jadavpuruniversity.in))

## Contents

### List of Tables

|               |         |
|---------------|---------|
| Table S1..... | Page 3  |
| Table S2..... | Page 47 |
| Table S3..... | Page 57 |
| Table S4..... | Page 59 |
| Table S5..... | Page 60 |
| Table S6..... | Page 60 |
| Table S7..... | Page 60 |
| Table S8..... | Page 61 |
| Table S9..... | Page 61 |

### List of Figures

|               |         |
|---------------|---------|
| Fig. S1.....  | Page 62 |
| Fig. S2.....  | Page 62 |
| Fig. S3.....  | Page 62 |
| Fig. S4.....  | Page 63 |
| Fig. S5.....  | Page 64 |
| Fig. S6.....  | Page 64 |
| Fig. S7.....  | Page 65 |
| Fig. S8.....  | Page 65 |
| Fig. S9.....  | Page 66 |
| Fig. S10..... | Page 66 |
| Fig. S11..... | Page 67 |
| Fig. S12..... | Page 67 |
| Fig. S13..... | Page 67 |

General methods for synthesis of intermediates.....Page 68

<sup>1</sup>HNMR spectra of intermediates (5a-5l).....Page 71

Supporting spectra (<sup>1</sup>HNMR, <sup>13</sup>CNMR, <sup>19</sup>FNMR, HPLC, LCMS and HRMS) of final compounds (6a-6l).....Page 77

**Table S1.** Training set compounds in SMILES format

| S. No. | Compounds | SMILES                                                                                              | Activity (nM) |
|--------|-----------|-----------------------------------------------------------------------------------------------------|---------------|
| 1      | 1         | <chem>CC(C)[C@@H]1NC(=O)[C@]2(C)CSC(=N2)c2csc(n2)CNC(=O)C[C@@H](/C=C(F)CCS)OC1=O</chem>             | 0.41          |
| 2      | 3         | <chem>O=C(CCCCCC(=O)N(Cc1ccc(Br)s1)c1ccc(OCCN2CCOCC2)c1)NO</chem>                                   | 1.14          |
| 3      | 4         | <chem>C[C@@H]1CN(C(=O)Nc2ccc(-c3nc(N4CCOCC4)c4cnn(CCCCCC(=O)NO)c4n3)cc2)CCO1</chem>                 | 1.28          |
| 4      | 5         | <chem>O=C(CCCCCC(=O)c1ccc(-c2ccc(Br)cc2)cc1)NO</chem>                                               | 2             |
| 5      | 6         | <chem>O=C(CCCCCC(=O)Nc1n[nH]c2cc(-c3ccccc3F)ccc12)NO</chem>                                         | 2.4           |
| 6      | 8         | <chem>COc1cc(OC)cc(-c2nmm([C@@H](Cc3ccccc3)C(=O)NO)c2C#CC2CC2)c1</chem>                             | 3             |
| 7      | 9         | <chem>COc1cccc(-c2ccc3c(NC(=O)CCCCC(=O)NO)n[nH]c3c2)c1</chem>                                       | 3             |
| 8      | 10        | <chem>CN1CC(C(=O)N[C@@H](CCCCC(=O)c2ccon2)c2ncc(-c3ccccc3F)[nH]2)C1</chem>                          | 3             |
| 9      | 11        | <chem>COc1ccc(-c2ccc3c(NC(=O)CCCCC(=O)NO)n[nH]c3c2)cc1OC</chem>                                     | 3.2           |
| 10     | 13        | <chem>COc1cccc(-c2ccc3c(NC(=O)CCCCC(=O)NO)n[nH]c3n2)c1</chem>                                       | 3.3           |
| 11     | 14        | <chem>CCOc1cccc(-c2ccc3c(NC(=O)CCCCC(=O)NO)n[nH]c3c2)c1</chem>                                      | 3.4           |
| 12     | 15        | <chem>COc1ccc(-c2ccc3c(NC(=O)CCCCC(=O)NO)n[nH]c3c2)cc1</chem>                                       | 3.6           |
| 13     | 16        | <chem>O=C(CCCCCC(=O)Nc1n[nH]c2cc(-c3ccccc3Cl)c3)ccc12)NO</chem>                                     | 3.8           |
| 14     | 18        | <chem>O=C(CCCCCC/C(=N/O)c1ccc(-c2ccccc2)cc1)NO</chem>                                               | 4             |
| 15     | 19        | <chem>O=C(CCCCCC(=O)Nc1n[nH]c2cc(-c3ccccc3Cl)ccc12)NO</chem>                                        | 4             |
| 16     | 20        | <chem>O=C(CCCCCC(=O)Nc1n[nH]c2cc(-c3ccccc3(F)F)c3)ccc12)NO</chem>                                   | 4.1           |
| 17     | 21        | <chem>COc1ccccc1-c1ccc2c(NC(=O)CCCCC(=O)NO)n[nH]c2c1</chem>                                         | 4.2           |
| 18     | 23        | <chem>COc1ccc(OC)cc(-c2ccc3c(NC(=O)CCCCC(=O)NO)n[nH]c3c2)c1</chem>                                  | 4.4           |
| 19     | 24        | <chem>COc1cccc(-c2ccc3c(NC(=O)CCCCC(=O)NO)n[nH]c3c2)c1</chem>                                       | 4.5           |
| 20     | 25        | <chem>O=C(CCCCCC(=O)c1ccc(N2CCN(c3ccccc3)CC2)cc1)NO</chem>                                          | 4.5           |
| 21     | 26        | <chem>COc1cc2nenc(Nc3ccc(Br)cc3)c2cc1OCCCCC(=O)NO</chem>                                            | 4.6           |
| 22     | 28        | <chem>O=C(CCCCCC(=O)c1ccc(-c2ccccc2)cc1)NO</chem>                                                   | 5             |
| 23     | 29        | <chem>COc1cc2nenc(Nc3ccc(Cl)cc3Cl)c2cc1OCCCCC(=O)NO</chem>                                          | 5.2           |
| 24     | 30        | <chem>CCCCCN(C(=O)c1cnc(N2CCN(Cc3c[nH]c4ccccc34)CC2)n1)c1</chem>                                    | 5.9           |
| 25     | 31        | <chem>CC1(C)CC(=O)Nc2ccc(C(=O)N[C@H]3CC[C@H](/C=C/C(=O)NO)CC3)cc21</chem>                           | 6             |
| 26     | 33        | <chem>O=C(NO)[C@H](Cc1c[nH]c2ccccc12)n1nnc(-c2ccccc2)c1C#CC1CC1</chem>                              | 7             |
| 27     | 34        | <chem>COc1ccc(-c2ccc3c(NC(=O)CCCCC(=O)NO)n[nH]c3n2)cc1</chem>                                       | 7.2           |
| 28     | 35        | <chem>O=C(NO)[C@H](Cc1ccccc1)n1nnc(-c2ccccc2)c1C#CC1CC1</chem>                                      | 8             |
| 29     | 36        | <chem>C=C(CCCCCC(=O)NO)c1ccc2ccccc2c1</chem>                                                        | 8             |
| 30     | 38        | <chem>CC(C)[C@@H]1NC(=O)[C@]2(C)CSC(=N2)c2csc(n2)CNC(=O)C[C@@H](/C(F)=C/CCS)OC1=O</chem>            | 8.5           |
| 31     | 39        | <chem>O=C(CCCCCC/C(=N/O)c1ccc2ccccc2c1)NO</chem>                                                    | 8.5           |
| 32     | 40        | <chem>O=C1CCC[C@@H](C(=O)N[C@@H](CCCCS)C(=O)Nc2ccccc(OCc3ccccc3)c2)N1</chem>                        | 9             |
| 33     | 41        | <chem>O=C(CCCCCCn1ccc(Nc2ncc3cnc(Cc4ccccc4F)c3n2)cn1)NO</chem>                                      | 9.2           |
| 34     | 43        | <chem>O=C(CCCCCC(=O)c1ccc(N2CCCC2)cc1)NO</chem>                                                     | 9.5           |
| 35     | 44        | <chem>O=C(NO)[C@H](Cc1ccccc1)n1nnc(-c2ccccc2)c1C#Cc1ccccc1</chem>                                   | 10            |
| 36     | 45        | <chem>C/C=C1\NC(=O)[C@H]2CSSCC/C=C/[C@@H](CC(=O)N[C@H](C(C)C)C(=O)N2)OC(=O)[C@H](C(C)C)NC1=O</chem> | 10            |
| 37     | 46        | <chem>N=C1Sc2ccccc2C2=NCCCN12</chem>                                                                | 11            |
| 38     | 48        | <chem>COc1ccc(-c2cc(OCCN(C)c3ncc(C(=O)NO)cn3)c3nnc(C)c3c2)cn1</chem>                                | 12            |

|    |      |                                                                                                       |             |
|----|------|-------------------------------------------------------------------------------------------------------|-------------|
| 39 | 49   | <chem>O=C(CCCCCC(=O)Nc1n[nH]c2cc(-c3cccc3)ccc12)NO</chem>                                             | 12.6        |
| 40 | 50   | <chem>O=C(CCCCCCOc1cccc(-c2nc3cccc3[nH]2)c1)NO</chem>                                                 | 12.88       |
| 41 | 51   | <chem>COc1cc(OC)cc(N(CCNC(C)C)c2ccc3ncc(-c4cnn(CCCCCC(=O)NO)c4)nc3c2)c1</chem>                        | 13          |
| 42 | 53   | <chem>CC(C)(C)c1ccc(S(=O)(=O)Nc2ccc(C(=O)NO)cc2)cc1</chem>                                            | 13.3        |
| 43 | 54   | <chem>CCCCCN(C(=O)c1cnc(N2CCN(Cc3cn(C)c4cccc34)CC2)nc1</chem>                                         | 14          |
| 44 | 55   | <chem>O=C(NO)c1ccc(NC(=O)c2c(F)c(F)c(F)c(F)c2F)cc1</chem>                                             | 14          |
| 45 | 56   | <chem>COc1ccc(C(=O)CCCCCCC(=O)NO)cc1</chem>                                                           | 15          |
| 46 | 58   | <chem>C[C@@H](c1cccc1)n1c(-c2cccc(/C=C/C(=O)NO)c2)nc2cccc21</chem>                                    | 16          |
| 47 | 59   | <chem>CCCCCN(C(=O)c1cnc(NCc2cccc2)nc1</chem>                                                          | 16          |
| 48 | 60   | <chem>Cc1cc(C(=O)CCCC[C@H](NC(=O)C2CN(C)C2)c2ncc(-c3cccc3F)[nH]2)no1</chem>                           | 16          |
| 49 | 61   | <chem>Cc1c(Cc2cccc2)nc(-c2cccc(/C=C/C(=O)NO)c2)n1CCc1cccc1</chem>                                     | 16          |
| 50 | 63   | <chem>Cc1cccc(CCNC(=O)[C@H](CCCCS)NC(=O)[C@H]2CCCC(=O)N2)c1</chem>                                    | 17          |
| 51 | 64   | <chem>COc1ncc(-c2cc(OCCCCC(=O)NO)c3ncnc(C)c3c2)cc1F</chem>                                            | 18          |
| 52 | 65   | <chem>COc1ccc(CC2C=Cc3cc(C(=O)NO)ccc32)cc1</chem>                                                     | 18.3        |
| 53 | 66   | <chem>CCCCCN(C(=O)c1cnc(NCc2ccc(CNC(C)=O)cc2)nc1</chem>                                               | 19          |
| 54 | 68   | <chem>Cc1nc(-c2cccc(/C=C/C(=O)NO)c2)n(CCc2cccc2)c1Cc1cccc1</chem>                                     | 20          |
| 55 | 69   | <chem>Cc1c(-c2cccc2)nc(-c2cccc(/C=C/C(=O)NO)c2)n1CCc1cccc1</chem>                                     | 20          |
| 56 | 70   | <chem>O=C(/C=C/c1ccc(Cc2ccc(CO)cc2)cc1)NO</chem>                                                      | 20          |
| 57 | 71   | <chem>O=C(NO)c1ccc(NC(=O)c2ccc(C3CC3)cc2)cc1</chem>                                                   | 20.4        |
| 58 | 73   | <chem>CC(C)(C)OC(=O)N[C@@H](Cc1ccc(O)cc1)C(=O)N1CC2(C[C@H]1C(=O)NCCCCC(=O)NO)SCCS2</chem>             | 21          |
| 59 | 74   | <chem>Cc1ccc(C(=O)Nc2ccc(C(=O)NO)cc2)cc1</chem>                                                       | 21.6        |
| 60 | 75   | <chem>CN(Cc1nc2c(N3CCOCC3)nc(-c3cnc(N)nc3)nc2n1C)c1ncc(C(=O)NO)cn1</chem>                             | 22          |
| 61 | 76   | <chem>O=C1CC/C=C/CCC(=O)N(Cc2cccc(/C=N/NC(=O)c3cccc(C(=O)NO)c3)c2)C[C@@H](c2cccc2)O1</chem>           | 23          |
| 62 | 78   | <chem>O=C1CCC[C@H](C(=O)N[C@@H](CCCCS)C(=O)NCc2ccc(C(F)(F)F)cc2)N1</chem>                             | 23          |
| 63 | 79   | <chem>CCCCCN(C(=O)c1ccc(CNC(C)=O)cc1</chem>                                                           | 23          |
| 64 | 80   | <chem>CN(Cc1nc2c(N3CCOCC3)nc(-c3ccc(N)cc3)nc2n1C)c1ncc(C(=O)NO)cn1</chem>                             | 24          |
| 65 | 81   | <chem>CC1(C)CC(=O)Nc2ccc(C(=O)NC[C@H]3CC[C@@H](CCC(=O)NO)CC3)cc21</chem>                              | 24          |
| 66 | 83   | <chem>O=C(NO)c1cnc(N2CCN(S(=O)(=O)c3ccc4cccc4c3)CC2)nc1</chem>                                        | 24.92       |
| 67 | 84   | <chem>Cc1nc(-c2cccc(/C=C/C(=O)NO)c2)n(CCc2cccc2)c1-c1cccc1</chem>                                     | 25          |
| 68 | 85   | <chem>O=C(CCCCCC(Cc1ccc2cccc2c1)NO</chem>                                                             | 25          |
| 69 | 86   | <chem>O=C(/C=C/c1ccc(-c2nc3cccc3n2CCc2cccc2)c1)NO</chem>                                              | 25          |
| 70 | 88   | <chem>COc1ccc(C(=O)NO)cc1OCc1cccc1</chem>                                                             | 25.40275576 |
| 71 | 89   | <chem>C/C=C1\NC(=O)[C@@H](CS)NC(=O)[C@@H](C(C)C)NC(=O)C[C@@H](/C=C/CCS)OC(=O)[C@H](C(C)C)NC1=O</chem> | 25.49509757 |
| 72 | 90   | <chem>Cn1cc(CNCC2CCN(c3ncc(C(=O)NO)en3)CC2)c2cccc21</chem>                                            | 25.55597765 |
| 73 | 91   | <chem>O=C(CC[C@H](CCCC(=O)Nc1cccc1)Cc1cccc1)NO</chem>                                                 | 27          |
| 74 | 93   | <chem>COc1ccc(/C=C/C(=O)NO)c(-c2ccc(-c3cccc3)cc2)c1</chem>                                            | 27.04986171 |
| 75 | 94   | <chem>CC(C)[C@H]1NC(=O)[C@]2(C)CSC(=N2)c2csc(n2)CNC(=O)C[C@@H](/C(F)=C/CCS)NC1=O</chem>               | 27.14       |
| 76 | 95   | <chem>CC(C)(C)c1ccc(CN(C(=O)NS(=O)(=O)c2ccc(F)cc2)c2ccc(C(=O)NO)cc2)cc1</chem>                        | 28          |
| 77 | 96   | <chem>CCCCCN(C(=O)c1cnc(NCc2cccc2)nc1</chem>                                                          | 28          |
| 78 | 2035 | <chem>[N-]=[N+]=Nc1ccc(Cn2cc(NC(=O)CCCCC(=O)NO)cn2)cc1</chem>                                         | 28          |
| 79 | 98   | <chem>C#CCOc1ccc(/C=N/NC(=O)c2cccc(C(=O)NO)c2)cc1</chem>                                              | 29          |
| 80 | 99   | <chem>O=C(NO)c1ccc(CN(C2CC2)S(=O)(=O)c2c(F)c(F)c(F)c(F)c2F)cc1</chem>                                 | 29          |

|     |      |                                                                                            |             |
|-----|------|--------------------------------------------------------------------------------------------|-------------|
| 81  | 100  | <chem>O=C(NO)c1cnc(N2CCN(C(/C=C/c3ccc(F)cc3)CO)CC2)nc1</chem>                              | 30          |
| 82  | 2036 | <chem>O=C(NO)c1ccc2c(c1)CN(Cc1ccc(-c3cccc([N+](=O)[O-])c3)o1)CC2</chem>                    | 30          |
| 83  | 101  | <chem>Cc1ccc(C(=O)NO)cc1NC(=O)c1ccc2ccccc2n1</chem>                                        | 30.3        |
| 84  | 103  | <chem>CCN1CCC[C@@H](n2c(-c3cccc(/C=C/C(=O)NO)c3)nc(-c3ccccc3)c2C)C1</chem>                 | 31          |
| 85  | 104  | <chem>Cc1c(-c2ccccc2)nc(-c2cccc(/C=C/C(=O)NO)c2)n1[C@@H]1CCCN(C(C)C)C1</chem>              | 31          |
| 86  | 105  | <chem>O=C(CCCCC[C@H](NC(=O)[C@H]1CCC(=O)N1)C(=O)NCc1ccccc1)NO</chem>                       | 31.6        |
| 87  | 106  | <chem>CN1CC(C(=O)N[C@@H](CCCCC(=O)c2ccon2)c2ncc(-c3ccccc3F)o2)C1</chem>                    | 32          |
| 88  | 108  | <chem>O=C(CCCCCC(=O)Nc1n[nH]c2cc(-c3ccsc3)ccc12)NO</chem>                                  | 32.5        |
| 89  | 109  | <chem>O=C(CCCCC[C@H](NC(=O)[C@H]1CCC(=O)N1)C(=O)Nc1cccc(C(F)F)c1)NO</chem>                 | 32.94996206 |
| 90  | 110  | <chem>CC1(C)CC(=O)Nc2ccc(NC(=O)CCCCC(=O)NO)cc21</chem>                                     | 33          |
| 91  | 111  | <chem>CC(C)(C)c1cccc(C(=O)Nc2ccc(C(=O)NO)cc2)c1</chem>                                     | 33.7        |
| 92  | 113  | <chem>Cc1ccc(C(=O)NO)cc1NCc1ccc(Cl)cc1Cl</chem>                                            | 35          |
| 93  | 114  | <chem>O=C(CCCCCC(=O)c1ccc2ccccc2c1)NO</chem>                                               | 35          |
| 94  | 115  | <chem>O=C(CCCCCC(O)c1ccc2ccccc2c1)NO</chem>                                                | 35          |
| 95  | 116  | <chem>Nc1ccc(-c2nc(N3CCOCC3)c3cnn(CCCCCC(=O)NO)c3n2)cc1</chem>                             | 35.67       |
| 96  | 118  | <chem>CCCCCN(C(=O)c1ccc(-c2ccc(CNC(C)=O)cc2)cc1</chem>                                     | 36          |
| 97  | 119  | <chem>O=C(/C=C/c1cccc(C(=O)NO)c1)Nc1ccccc1</chem>                                          | 37          |
| 98  | 120  | <chem>CN(CC(=O)N(Cc1ccc(C(C)(C)C)cc1)c1ccc(C(=O)NO)cc1)S(=O)(=O)c1ccc(F)cc1</chem>         | 37.9        |
| 99  | 121  | <chem>O=C(Cc1ccc(-c2csc(NC(=O)COc3ccccc3)n2)s1)NO</chem>                                   | 38          |
| 100 | 123  | <chem>O=C(/C=C/c1ccc(CN(CCO)CCc2c[nH]c3ccccc23)cc1)NO</chem>                               | 39.19183588 |
| 101 | 124  | <chem>O=C1NC[C@@H](c2ccccc2)[C@@H]1C(=O)N[C@@H](CCCC)C(=O)Nc1ccccc1</chem>                 | 40          |
| 102 | 125  | <chem>O=C(/C=C/c1cccc(-c2nc3ccccc3n2Cc2ccccc2)c1)NO</chem>                                 | 40          |
| 103 | 126  | <chem>CC(C)n1c(-c2cccc(/C=C/C(=O)NO)c2)nc2ccccc21</chem>                                   | 40          |
| 104 | 128  | <chem>O=C(Cc1ccc(-c2csc(NC(=O)Cc3ccccc3)n2)s1)NO</chem>                                    | 41          |
| 105 | 129  | <chem>O=C(NO)c1ccc(NC(=O)C2(c3c[nH]c(-c4ccccc4)n3)CCCC2)cc1</chem>                         | 41          |
| 106 | 130  | <chem>COc1cccc(-c2ccc3c(NC(=O)CCCC(=O)NO)n[nH]c3c2)c1</chem>                               | 41          |
| 107 | 131  | <chem>COc1ccc(-c2cc(-c3ccn(Cc4ccc(C(=O)NO)cc4)n3)ccn2)cc1</chem>                           | 41.6        |
| 108 | 133  | <chem>CC(C)(C)c1ccc(NC(=O)c2ccc(C(=O)NO)cc2)cc1</chem>                                     | 43.9        |
| 109 | 134  | <chem>O=C(NO)c1ccc(NC(=O)C2(c3ccc4ccccc4c3)CCOCC2)cc1</chem>                               | 44          |
| 110 | 135  | <chem>O=C(CCCCN1CCc2ccccc2C1c1ccccc1)NO</chem>                                             | 44          |
| 111 | 136  | <chem>CC(C)[C@@H]1NC(=O)[C@]2(C)CSC(=N2)c2csc(n2)CNC(=O)C[C@@H](/C=C/C(F)F)CS)OC1=O</chem> | 44.09       |
| 112 | 138  | <chem>O=C(CCCCCC(=O)c1ccc(C(F)F)cc1)NO</chem>                                              | 45          |
| 113 | 139  | <chem>CCCCCN(C(=O)c1cccc(NCc2ccccc2)c1</chem>                                              | 46          |
| 114 | 140  | <chem>COc1ccc(/C=C/C(=O)c2nnc(-c3ccc(Cl)cc3)c2C)cc1OC</chem>                               | 47          |
| 115 | 141  | <chem>O=C(/C=C/c1ccc(NC(=O)Cc2cccc3ccccc23)en1)NO</chem>                                   | 47          |
| 116 | 143  | <chem>O=C(CCCCCC(=O)Nc1ccc2[nH]c(=O)ccc2c1)NO</chem>                                       | 48          |
| 117 | 144  | <chem>CC1(C)CC(=O)Nc2ccc(C(=O)NCc3ccc(/C=C/C(=O)NO)cc3)c21</chem>                          | 49          |
| 118 | 145  | <chem>O=C(/C=C/c1cccc(-c2nc3ccccc3n2-c2ccccc2)c1)NO</chem>                                 | 50          |
| 119 | 146  | <chem>CCN1CCC[C@@H](n2c(-c3cccc(/C=C/C(=O)NO)c3)nc(Cc3ccccc3)c2C)C1</chem>                 | 50          |
| 120 | 148  | <chem>Cc1nc(-c2ccccc2)n(Cc2ccccc2)c1-c1cccc(/C=C/C(=O)NO)c1</chem>                         | 50          |
| 121 | 149  | <chem>Cc1c(Cc2ccccc2)nc(-c2cccc(/C=C/C(=O)NO)c2)n1CCN1CCOCC1</chem>                        | 50          |
| 122 | 150  | <chem>O=C(/C=C/c1cccc(-c2nc3ccccc3n2C2CCCC2)c1)NO</chem>                                   | 50          |
| 123 | 151  | <chem>Cc1c(-c2ccccc2)nc(-c2cccc(/C=C/C(=O)NO)c2)n1[C@@H]1CCCN(C)C1</chem>                  | 50          |

|     |      |                                                                          |             |
|-----|------|--------------------------------------------------------------------------|-------------|
| 124 | 153  | C#CCN(C)CCCOc1cc(NC(=O)CCCCC(=O)NO)ccc1Cl                                | 50          |
| 125 | 154  | O=C(/C=C/c1cccc(-c2nc3cccc3n2-c2ccc(Cl)cc2)c1)NO                         | 50          |
| 126 | 155  | CC(C)N(C(=O)c1cc(C(F)(F)F)cc(C(F)(F)F)c1)c1ccc(C(=O)NO)cc1               | 51.42178527 |
| 127 | 156  | COc1cc(NC(=O)NOCCCCC(=O)NO)c2nc(OC)cc(C)c2c1                             | 51.76485294 |
| 128 | 158  | O=C(NO)c1cccc(C(=O)N/N=C/c2cccc2)c1                                      | 52          |
| 129 | 159  | O=C(NO)c1cccc(-c2nc(CSc3cccc3)n[nH]2)c1                                  | 53          |
| 130 | 160  | O=C(CCCCCNC(=O)c1ccc2c(c1)CCC(=O)N2)NO                                   | 53          |
| 131 | 161  | O=C(/C=C/c1cccc1Cl)NO                                                    | 54          |
| 132 | 163  | C/C(=N/N(C)C(=O)c1ccc(N(C)C)cc1)c1ccc(C(=O)NO)cc1                        | 54          |
| 133 | 164  | CC1(C)CC(=O)Nc2ccc(C(=O)NCCCCC(=O)NO)cc21                                | 55          |
| 134 | 165  | O=C(CCN1CCc2cccc2C1c1ccc(-c2cccc2)cc1)NO                                 | 55          |
| 135 | 166  | Cc1ccc2c(c1)C1=NCCCN1C(=S)S2                                             | 57          |
| 136 | 168  | O=C1CC[C@@H](C(=O)N[C@@H](CCCCS)C(=O)Nc2cccc2)N1                         | 59          |
| 137 | 169  | CN1C(=O)CC(C)(C)c2cc(C(=O)NCCCCC(=O)NO)ccc21                             | 59          |
| 138 | 170  | O=C(NO)c1ccc(NC(=O)C2(c3ccc(Br)cc3)CCOCC2)cc1                            | 59          |
| 139 | 171  | C=C(c1cc(OC)c(OC)c(OC)c1)c1ccc(OC)cc1/C=C/C(=O)NO                        | 60          |
| 140 | 173  | COc1ccc(CS(=O)(=O)Nc2ccc(/C=C/C(=O)NO)cc2)cc1                            | 60          |
| 141 | 174  | O=C(CCCCCC(=O)Nc1ccc2c(c1)/C(=C/c1ccc[nH]1)C(=O)N2)NO                    | 60.2        |
| 142 | 175  | COc1ccc(/C=N/NC(=O)CCCCC(=O)NO)cc1                                       | 60.32       |
| 143 | 176  | CC(C)N(C(=O)c1cccc(C(F)(F)F)c1F)c1ccc(C(=O)NO)cc1                        | 60.82187107 |
| 144 | 178  | O=C(NO)c1ccc(N(CC2CC2)C(=O)c2cccc(C(F)(F)F)c2)cc1                        | 61.68306088 |
| 145 | 179  | O=C1NCCC[C@@H]1C(=O)N[C@@H](CCCCS)C(=O)Nc1ccc1                           | 62          |
| 146 | 180  | CC(C)[C@@H]1NC(=O)[C@]2(C)CSC(=N2)c2csc(n2)CNC(=O)C[C@@H]1/C=C/CCS)OC1=O | 62.06632659 |
| 147 | 181  | CC(C)(C)c1cccc(C(=O)N(CC2CC2)c2ccc(C(=O)NO)cc2)c1                        | 62.2430719  |
| 148 | 183  | O=C(/C=C/c1cccc(-c2nc3cccc3n2CCN2CCCC2)c1)NO                             | 63          |
| 149 | 184  | Cc1nc(-c2cccc(/C=C/C(=O)NO)c2)n(CCN2CCOCC2)c1Cc1cccc1                    | 63          |
| 150 | 185  | COc1ccc(NC(=O)[C@H](Cc2ccc(OCC(=O)NO)cc2)NC(=O)Cc2cccc2)cc1              | 63          |
| 151 | 186  | Cc1nc(Cc2cccc2)n(Cc2cccc2)c1-c1cccc(/C=C/C(=O)NO)c1                      | 63          |
| 152 | 188  | COc1ccc(-n2c(-c3cccc(/C=C/C(=O)NO)c3)nc3cccc32)cc1                       | 63          |
| 153 | 189  | CCCCCNNC(=O)c1enc(NCc2cccc3cccc23)nc1                                    | 63          |
| 154 | 190  | CC(C)N(C(=O)c1cccc(C(F)(F)F)c1)c1ccc(C(=O)NO)cc1                         | 63.78675411 |
| 155 | 191  | O=C(NO)c1ccc(Cn2sc3cccc3e2=O)cc1                                         | 64          |
| 156 | 193  | COc1ccc(C(=O)NO)cc1C(=O)Nc1ccc2c(c1)cc(C)c(=O)n2C                        | 65          |
| 157 | 194  | O=C(CCCCCC(=O)c1cccc1)NO                                                 | 65          |
| 158 | 195  | COc1ccc(-c2nc(N3CCOCC3)c3sc(CN(C)c4ncc(C(=O)NO)cn4)cc3n2)cn1             | 65.16278326 |
| 159 | 196  | O=C(/C=C/c1ccc(C(=O)NC(Cc2c[nH]c3cccc23)C(=O)Nc2ccc3cccc3e2)cc1)NO       | 65.7        |
| 160 | 198  | O=C(NO)c1ccc(NC(=O)C2(c3ccc(-c4en[nH]e4)cc3)CCCC2)cc1                    | 69          |
| 161 | 199  | CC(C)N(C(=O)c1cccc(OC(F)(F)F)c1)c1ccc(C(=O)NO)cc1                        | 69.05360237 |
| 162 | 200  | COc1ccc(C(=O)NO)cc1NCc1cccc1                                             | 69.49820142 |
| 163 | 201  | Nc1nc2cc(-c3nn(CCCCC(=O)NO)c4nenc(N)c34)ccc2o1                           | 69.6491206  |
| 164 | 203  | CCOc1ccc(C(C)=O)cc1NC(=O)c1cc(C(=O)NO)ccc1C                              | 70          |
| 165 | 2037 | O=C(/C=C/c1ccc(/C=N/OCc2ccc([N+](=O)[O-])cc2)cc1)NO                      | 70          |
| 166 | 204  | CN(C)c1cccc(C(=O)NO)c1                                                   | 70.2        |
| 167 | 205  | CC[C@H](Nc1ncn2[nH]cnc12)c1nc2cccc(-c3ccc(C(=O)NO)cc3)c2c(=O)n1-c1cccc1  | 71          |
| 168 | 206  | O=C(NO)c1ccc(CN2C(=O)c3cccc3S2(=O)=O)cc1-c1cccc1                         | 71          |
| 169 | 208  | O=C(CCCCCCN1C(=O)c2cccc2C1=O)NO                                          | 71.4        |
| 170 | 209  | Cn1c(=O)ccc2cc(C(=O)NCCCCC(=O)NO)ccc21                                   | 72          |

|     |      |                                                                                 |             |
|-----|------|---------------------------------------------------------------------------------|-------------|
| 171 | 210  | CC(C)C[C@H](NC(=O)[C@H](Cc1cccc1)NC(=O)c1cnccn1)B(O)O                           | 72          |
| 172 | 211  | O=C(NO)c1ccc(F)c(NC2cccc2)c1                                                    | 72          |
| 173 | 213  | O=C(CCCCCNC(=O)c1ccc[nH]c(=O)ccc2c1)NO                                          | 73          |
| 174 | 214  | CCCC(CCCC(=O)Nc1cccc1)CCC(=O)NO                                                 | 74          |
| 175 | 215  | CC(C)(C)c1ccc(CC(=O)Nc2ccc(C(=O)NO)cc2)cc1                                      | 74.3        |
| 176 | 216  | COc1ccc(-c2cc(-c3cccc3)[nH]c2C(=O)NC2ccc(C(=O)Nc3cccn3)cc2)cc1                  | 74.8        |
| 177 | 218  | O=C(/C=C/c1ccc(NS(=O)(=O)c2ccc(Cl)cc2)cc1)NO                                    | 75          |
| 178 | 219  | CC1(Nc2ccc(C(=O)NO)cc2)CCN(c2ccc3ncccc3c2)C1=O                                  | 76          |
| 179 | 220  | O=C(CCCCCC(=O)Nc1enn(Cc2cccc2)c1)NO                                             | 76          |
| 180 | 221  | S=C1Sc2cccc(I)c2C2=NCCCN12                                                      | 76          |
| 181 | 223  | Cc1c(-c2cccc2)nc(-c2cccc(/C=C/C(=O)NO)c2)n1CCN1CCOCC1                           | 79          |
| 182 | 224  | Cc1nc(-c2cccc(/C=C/C(=O)NO)c2)n(CCN2CCOCC2)c1-c1cccc1                           | 79          |
| 183 | 225  | CCCCCC(CCCC(=O)Nc1cccc1)CCC(=O)NO                                               | 79          |
| 184 | 226  | Cc1c(Cc2cccc2)nc(-c2cccc(/C=C/C(=O)NO)c2)n1[C@@H]1CCCN(C)C1                     | 79          |
| 185 | 228  | C#Cc1cccc(Nc2nnc3cc(OC)c(OCCCCC(=O)NO)cc23)c1                                   | 79.8        |
| 186 | 229  | O=C(NO)c1ccc(S(=O)(=O)NC2cccc2)c1                                               | 80          |
| 187 | 230  | C#CCN(C)CCCOc1cc(NCc2ccc(/C=C/C(=O)NO)cc2)ccc1Cl                                | 80          |
| 188 | 231  | COc1ccc2cc(C(=O)NCCCCC(=O)NO)ccc2n1                                             | 80          |
| 189 | 233  | CCN(c1ccc(C(=O)NO)cc1)S(=O)(=O)c1ccc(C(C)(C)C)c1                                | 80.43693182 |
| 190 | 234  | COc1ccc(C2c3cccc3CCN2CCC(=O)NO)cc1                                              | 82          |
| 191 | 2038 | O=C(CCCCCC(=O)Nc1enn(Cc2ccc([N+](=O)[O-])cc2)c1)NO                              | 82          |
| 192 | 235  | CC(C)N(Cc1ccc(CC(=O)NO)cc1)S(=O)(=O)c1cc(F)c(F)c(F)c1F                          | 84.6        |
| 193 | 236  | Cc1ccc2nc3c4cccc4c(NCCCCC(=O)NO)nn3c(=O)c2c1                                    | 85.4        |
| 194 | 238  | Cc1[nH]c2cccc2c1C1=CCC(NCc2ccc(OCC(=O)NO)cc2F)CC1                               | 86          |
| 195 | 239  | COc1ccc(NC(=O)[C@H](Cc2ccc(OCC(=O)NO)cc2)NC(=O)CCc2cccc2)cc1                    | 86          |
| 196 | 240  | CC(C)C(C(=O)Nc1ccc(C(=O)NO)cc1)c1cccc1                                          | 87          |
| 197 | 241  | COc1ccc(NC(=O)[C@H](Cc2ccc(OCC(=O)NO)cc2)NC(=O)c2cccc2)cc1                      | 87          |
| 198 | 243  | O=C(NO)c1ccc(CN2C(=O)c3cccc(F)c3C2=O)cc1-c1cccc1                                | 88          |
| 199 | 244  | COc1ccc(C(=O)NO)cc1NC(=O)c1cccc1                                                | 88.3        |
| 200 | 245  | CN(C)c1ccc(C2(C(=O)Nc3ccc(C(=O)NO)cc3)CCCC2)cc1                                 | 89          |
| 201 | 246  | COc1ccc(C(C)=O)cc1NC(=O)c1cc(C(=O)NO)ccc1C                                      | 90          |
| 202 | 248  | O=C(COc1ccc(CNCCc2c[nH]c3cccc23)c(F)c1)NO                                       | 90          |
| 203 | 249  | COc1ccc(C(C)=O)cc1NC(=O)c1cc(C(=O)NO)ccc1Cl                                     | 90          |
| 204 | 250  | CCC(=O)CCCC[C@H](NC(=O)[C@H]1CC12CCN(CC)CC2)c1[nH]c2nc1C(=O)NCCC/C=C/c1cccc-2c1 | 90          |
| 205 | 251  | COc1ccc(NC(=O)[C@H](Cc2ccc(OCC(=O)NO)cc2)NC(=O)CCc2cccc2)cc1                    | 90          |
| 206 | 253  | COc1cc2cc(c1)COc1cccc1NC(=O)[C@@H](CCCCC(=O)NO)OCCC2                            | 90.7        |
| 207 | 254  | COc1ccc(Cn2ccc3cc(C(=O)NO)ccc32)cc1                                             | 92          |
| 208 | 255  | CCN(C(=O)c1cc(C(C)(C)C)cc(C(C)(C)C)c1)c1ccc(C(=O)NO)c1                          | 92.8353381  |
| 209 | 256  | COc1ccc(-c2nc(N3CCOCC3)c3nc(CN(C)c4ncc(C(=O)NO)cn4)n(C)c3n2)cc1                 | 92.92       |
| 210 | 258  | CCN(C(=O)c1cccc(C(F)(F)F)c1)c1ccc(C(=O)NO)cc1                                   | 94.71641885 |
| 211 | 259  | O=C(NO)c1ccc(Cn2c(=O)n(CCc3cccc3)c(=O)c3ccc(F)cc32)c1                           | 95          |

|     |     |                                                                                                       |             |
|-----|-----|-------------------------------------------------------------------------------------------------------|-------------|
| 212 | 260 | <chem>COc1ccccc1C(=O)CCCCCCCC(=O)NO</chem>                                                            | 95          |
| 213 | 261 | <chem>Cc1ccc2nc3c4ccccc4c(NCCCCCCCC(=O)NO)nn3c(=O)c2c1</chem>                                         | 96.2        |
| 214 | 263 | <chem>O=C(NO)c1ccc(Cn2c(=O)n(CCc3ccccc3)c(=O)c3ccccc32)s1</chem>                                      | 97          |
| 215 | 264 | <chem>C[C@@H](N)C(=O)NCc1nnc(-c2ccccc2)o1</chem>                                                      | 98          |
| 216 | 265 | <chem>CCc1nc2ccc(Cc3ccc(C(=O)NO)cc3)cc2c(=O)n1CCc1ccccc1</chem>                                       | 99          |
| 217 | 266 | <chem>O=C(NO)c1ccc(CNC(=O)N2CCC(N3CC(c4ccccc4)(c4ccccc4)C3=O)CC2)cc1</chem>                           | 99          |
| 218 | 268 | <chem>CC(C)Oe1ccc(C(C)(C)O)cc1-c1cn(C)c(=O)c2[nH]c(C(=O)NCCCCCCC(=O)NO)cc12</chem>                    | 99.6        |
| 219 | 269 | <chem>Cn1c(-c2ccccc/C=C/C(=O)NO)c2)nc2ccccc21</chem>                                                  | 100         |
| 220 | 270 | <chem>O=C(/C=C/c1ccc(NS(=O)(=O)c2ccccc(C(F)(F)F)c2)cc1)NO</chem>                                      | 100         |
| 221 | 271 | <chem>CC(C)(C)c1ccc(CS(=O)(=O)Nc2ccc(/C=C/C(=O)NO)cc2)cc1</chem>                                      | 100         |
| 222 | 273 | <chem>O=C(/C=C/c1cccc(-c2nc3ccccc3n2CCN2CCCC2)c1)NO</chem>                                            | 100         |
| 223 | 274 | <chem>O=C(CCc1ccc(NS(=O)(=O)c2ccccc2)cc1)NO</chem>                                                    | 100         |
| 224 | 275 | <chem>Cc1nc(C)n(CCc2ccccc2)c1-c1cccc(/C=C/C(=O)NO)c1</chem>                                           | 100         |
| 225 | 276 | <chem>CN1CC(C(=O)N[C@@H](CCCCC(=O)c2ncco2)c2ncc(-c3ccc(F)cc3)[nH]2)C1</chem>                          | 100         |
| 226 | 278 | <chem>CCN1CCC[C@@H](n2c(Cc3ccccc3)nc(C)c2-c2ccccc/C=C/C(=O)NO)c2)C1</chem>                            | 100         |
| 227 | 279 | <chem>O=C(/C=C/c1ccc(NS(=O)(=O)c2ccc(Cl)c(Cl)c2)cc1)NO</chem>                                         | 100         |
| 228 | 280 | <chem>Cc1nc(-c2ccccc/C=C/C(=O)NO)c2)n([C@@H]2CCCN(C)C2)c1-c1ccccc1</chem>                             | 100         |
| 229 | 281 | <chem>O=C(NO)c1cccc(-c2cn(CCc3ccsc3)nn2)c1</chem>                                                     | 100         |
| 230 | 283 | <chem>Cc1ccc(CN(Cc2ccc(C(=O)NO)cc2)S(=O)(=O)c2c(F)c(F)c(F)c(F)c2F)cc1</chem>                          | 101         |
| 231 | 284 | <chem>CC(C)[C@@H]1NC(=O)[C@]2(C)CSC(=N2)c2ccnc(c2)CNC(=O)C[C@@H](/C=C/CC)OC1=O</chem>                 | 101.8       |
| 232 | 285 | <chem>COc1ccc(NC(=O)[C@@H]2Cc3ccc(OCC(=O)NO)cc3CN2C(=O)[C@H](Cc2ccccc2)NC(=O)OC(C)(C)C)cc1</chem>     | 103         |
| 233 | 286 | <chem>O=C(CCCCCCN1C(=O)c2ccccc2C1=O)NO</chem>                                                         | 103         |
| 234 | 288 | <chem>CCC(C(=O)Nc1ccc(/C=C/C(=O)NO)nc1)c1ccccc1</chem>                                                | 104         |
| 235 | 289 | <chem>Cc1ccc(C(=O)NO)cc1NC1CCCC1</chem>                                                               | 104.3       |
| 236 | 290 | <chem>Cc1cccc(NC(=O)[C@H](CCCCS)NC(=O)[C@@H]2CCC(=O)N2)c1</chem>                                      | 106         |
| 237 | 291 | <chem>COc1ccc(-c2cc(C(=O)NCc3ccc(C(=O)NO)cc3)ccn2)cc1</chem>                                          | 107         |
| 238 | 293 | <chem>Cn1c(CCCC(=O)O)nc2cc(N(CCC1)CC1)ccc21</chem>                                                    | 107         |
| 239 | 294 | <chem>CCC(=O)CCCC[C@@H]1NC(=O)[C@@H](C)n2nccc2[C@H](CC(C)C)NC(=O)[C@H](Cc2c[nH]c3ccccc23)NC1=O</chem> | 107.4709263 |
| 240 | 295 | <chem>O=C(NO)c1cccc(CN(C2CC2)S(=O)(=O)c2c(F)c(F)c(F)c(F)c2F)c1</chem>                                 | 108         |
| 241 | 296 | <chem>COc1ccc2c(c1)c(CC(=O)NCCCCCCC(=O)NO)c(C)n2C(=O)c1ccc(Cl)cc1</chem>                              | 109         |
| 242 | 298 | <chem>Cc1cc(C)c(CNC(=O)c2cc(-c3ccc(N4CCN(c5nccc(C(=O)NO)en5)CC4)nc3)cc3c2cnn3C(C)C)c(=O)[nH]1</chem>  | 110         |
| 243 | 299 | <chem>C/C(=N)NC(=O)c1ccc(N(C)C)cc1)c1ccc(C(=O)NO)cc1</chem>                                           | 110         |
| 244 | 300 | <chem>O=C(NO)c1ccc(NC2CCN(c3ccc(C(F)(F)F)cc3)C2=O)cc1</chem>                                          | 110         |
| 245 | 301 | <chem>Cc1cc(C)c(CNC(=O)c2cc(C)n(-c3ccccc(NC(=O)CCCCCCC(=O)NO)c3)c2C)c(=O)[nH]1</chem>                 | 110         |
| 246 | 303 | <chem>O=C1CN(Cc2ccc(C(=O)NO)cc2)C(=O)[C@H](Cc2c[nH]c3ccccc23)N1</chem>                                | 112         |
| 247 | 304 | <chem>O=C(CCCCC[C@H](NC(=O)[C@@H]1CC(=O)N1)C(=O)Nc1ccccc1)NO</chem>                                   | 112.8760382 |
| 248 | 305 | <chem>O=C(CCCCC[C@H](NC(=O)[C@@H]1CCC(=O)N1)C(=O)Nc1ccccc1)NO</chem>                                  | 112.8760382 |
| 249 | 306 | <chem>O=C(CCCCCC(=O)Nc1cccc(C(F)(F)F)c1)NO</chem>                                                     | 113         |
| 250 | 308 | <chem>Cc1cc2cc(NC(=O)c3cc(C(=O)NO)ccc3Cl)ccc2n(C)c1=O</chem>                                          | 113         |

|     |      |                                                                                                                                                                                                 |             |
|-----|------|-------------------------------------------------------------------------------------------------------------------------------------------------------------------------------------------------|-------------|
| 251 | 309  | <chem>COc1cc2c(cc1OC)C(=O)C(CC1CCN(Cc3ccc(/C=C/C(=O)NO)cc3)CC1)C2</chem>                                                                                                                        | 113         |
| 252 | 310  | <chem>COc1ccc(NC(=O)[C@@H]2Cc3ccc(OCC(=O)NO)cc3CN2C(=O)CCc2ccccc2)cc1</chem>                                                                                                                    | 114         |
| 253 | 311  | <chem>O=C(NO)c1cccc(C(=O)Nc2ccccc2)c1</chem>                                                                                                                                                    | 114.8912529 |
| 254 | 313  | <chem>COc1ccc2c(c1)c(CC(=O)O)c(C)n2Cc1ccc(-c2cn(CCCCCC(=O)NO)nn2)cc1</chem>                                                                                                                     | 116         |
| 255 | 314  | <chem>O=C(O)c1cccc(-c2ccc(C3(C(=O)Nc4ccc(C(=O)NO)cc4)CCCC3)cc2)c1</chem>                                                                                                                        | 118         |
| 256 | 315  | <chem>O=C(CCCCC[C@H](NC(=O)C1CCNC1=O)C(=O)Nc1ccccc1)NO</chem>                                                                                                                                   | 118         |
| 257 | 316  | <chem>COc1cc2cc(c1)COc1ccccc1NC(=O)C(CCCCC(=O)NO)OC/C=C\2</chem>                                                                                                                                | 119         |
| 258 | 318  | <chem>CC(C)N(C(=O)c1ccc(F)c(C(F)(F)F)c1)c1ccc(C(=O)NO)cc1</chem>                                                                                                                                | 119         |
| 259 | 319  | <chem>Cc1ccc(C(=O)NO)cc1NCc1ccc2ccccc2c1</chem>                                                                                                                                                 | 119         |
| 260 | 320  | <chem>CC(Cc1nc2cc(/C=C/C(=O)NO)ccc2n1CCCO)c1ccccc1</chem>                                                                                                                                       | 119         |
| 261 | 321  | <chem>O=C(NO)c1cccc(C(=O)NCCc2ccccc2)c1</chem>                                                                                                                                                  | 120         |
| 262 | 323  | <chem>O=C(NO)c1ccc(Cn2cc(Nc3ncc(Cl)c(Nc4ccc(F)cc4)n3)cn2)cc1</chem>                                                                                                                             | 120         |
| 263 | 324  | <chem>COc1ccc(C(=O)NO)cc1OCc1ccccc1Cl</chem>                                                                                                                                                    | 120         |
| 264 | 325  | <chem>COc1ccc(NC(=O)[C@H](Cc2ccc(OCC(=O)NO)cc2)NC(=O)OCc2ccccc2)cc1</chem>                                                                                                                      | 120         |
| 265 | 326  | <chem>O=C(/C=C/c1cccc(-c2nc3ccccc3n2[C@@H]2CCCNC2)c1)NO</chem>                                                                                                                                  | 120         |
| 266 | 328  | <chem>CS(=O)(=O)c1ccc(N2CCC(Nc3ccc(C(=O)NO)cc3)C2=O)cc1</chem>                                                                                                                                  | 120         |
| 267 | 329  | <chem>CC(C)C[C@H]1CC(=O)N[C@@H](C)C(=O)N[C@@H](CCCC(=O)NO)C(=O)N[C@@H](Cc2cc3ccccc3[nH]2)C(=O)N1</chem>                                                                                         | 120         |
| 268 | 330  | <chem>O=C(NO)c1ccc(NC2CCN(c3ccc(Cl)cc3)C2=O)cc1</chem>                                                                                                                                          | 120         |
| 269 | 331  | <chem>Cc1ccc(-c2nnc(CNC(=O)[C@@H](C)N)o2)cc1</chem>                                                                                                                                             | 121         |
| 270 | 333  | <chem>COc1ccc(-c2cc(-c3ccccc3)[nH]e2C(=O)NCc2ccc(C(=O)Nc3ccccc3N)cc2)cc1</chem>                                                                                                                 | 124.2       |
| 271 | 334  | <chem>O=C(NO)c1ccc(N(Cc2ccccc2)C(=O)c2ccccc(C(F)(F)F)e2)cc1</chem>                                                                                                                              | 125.4368367 |
| 272 | 335  | <chem>O=C(CCCCCNC(=O)c1enc(N(c2ccccc2)c2ccccc2)nc1)NO</chem>                                                                                                                                    | 129.5118259 |
| 273 | 336  | <chem>CN(C)CCCNC(=O)c1cc(NC(=O)c2cc(NC(=O)c3cc(NC(=O)c4nc(NC(=O)CCCNC(=O)c5cc(NC(=O)c6cc(NC(=O)c7cc(NC(=O)c8nc(NC(=O)CCNC(=O)CCNC(=O)CCCCC(=O)NO)cn8C)cn7C)cn6C)cn5C)cn4C)cn3C)cn2C)cn1C</chem> | 130         |
| 274 | 338  | <chem>N#Cc1ccc2c(=O)n(Cc3ccccc3)c(=O)n(Cc3ccc(C(=O)NO)cc3)c2c1</chem>                                                                                                                           | 130         |
| 275 | 339  | <chem>Cc1cccc2c1C1=NCCCN1C(=S)S2</chem>                                                                                                                                                         | 130         |
| 276 | 340  | <chem>O=C(/C=C/c1cccc(S(=O)(=O)c2ccc3ccccc3n2)c1)NO</chem>                                                                                                                                      | 130         |
| 277 | 341  | <chem>CN(/N=C/c1ccc(C(=O)NO)cc1)C(=O)c1ccc(N(C)C)cc1</chem>                                                                                                                                     | 130         |
| 278 | 343  | <chem>O=C(NO)c1ccc(CN2CC(=O)N(Cc3ccc(Cl)cc3)[C@H](Cc3ccc(cc3)C2=O)cc1</chem>                                                                                                                    | 130         |
| 279 | 344  | <chem>Cc1ccc(C(=O)NO)cc1NCCc1ccccc1</chem>                                                                                                                                                      | 130         |
| 280 | 345  | <chem>CCN(C(=O)c1cccc(C(C)(C)C)c1)c1ccc(C(=O)NO)cc1</chem>                                                                                                                                      | 130.1940859 |
| 281 | 346  | <chem>CC(C)C[C@H]1CC(=O)N[C@@H](C)C(=O)N[C@@H](CCCC(=O)NO)C(=O)N[C@@H](Cc2c[nH]c3ccccc23)C(=O)N1</chem>                                                                                         | 130.9924048 |
| 282 | 348  | <chem>O=C(CCCCCCNc1nn2c(=O)c3ccccc3nc2c2ccccc12)NO</chem>                                                                                                                                       | 131         |
| 283 | 349  | <chem>O=C(/C=C/c1ccc(C(=O)NO)cc1)N[C@@H](Cc1c[nH]c2ccccc12)C(=O)Nc1ccccc1Cl</chem>                                                                                                              | 132.3       |
| 284 | 350  | <chem>CC(C)(C)c1ccc(-c2nnn([C@@H](Cc3ccccc3)C(=O)NO)c2C#CC2CC2)cc1</chem>                                                                                                                       | 133         |
| 285 | 351  | <chem>CC(C)(C)c1ccc(CN(C(=O)CN(Cc2c(F)c(F)c(F)c2F)S(C)(=O)=O)c2ccc(C(=O)NO)cc2)cc1</chem>                                                                                                       | 133         |
| 286 | 2040 | <chem>NCC(=O)NCc1nnc(-c2ccc([N+](=O)[O-])cc2)o1</chem>                                                                                                                                          | 134         |
| 287 | 353  | <chem>O=C(CCCCCCCC(=O)c1ccccc1)NO</chem>                                                                                                                                                        | 135         |
| 288 | 354  | <chem>COC(=O)Cc1c(C)n(Cc2ccc(-c3cn(CCCCCC(=O)NO)nn3)cc2)c2ccc(OC)cc12</chem>                                                                                                                    | 135         |
| 289 | 355  | <chem>NCC(=O)NCc1nnc(-c2ccc(F)cc2)o1</chem>                                                                                                                                                     | 135         |

|     |     |                                                                                                     |             |
|-----|-----|-----------------------------------------------------------------------------------------------------|-------------|
| 290 | 356 | Cc1cccc(NC(=O)[C@H](CCCCS)NC(=O)[C@@H]2CCCC(=O)N2)c1                                                | 135         |
| 291 | 358 | O=C(NO)c1ccc(Cn2c(=O)[nH]c(=O)c3cccc(Cl)c32)cc1                                                     | 137         |
| 292 | 359 | CC[C@H](Nc1ncnc2[nH]cnc12)c1nc2cccc(CNC(=O)c3ccc(C(=O)NO)cc3)c2c(=O)n1-c1cccc1                      | 138         |
| 293 | 360 | CC[C@H](C)[C@H](NC(=O)OC(C)(C)C)C(=O)N1Cc2cc(OC(C(=O)NO)ccc2C[C@H]1C(=O)Nc1ccc(OC)cc1               | 139         |
| 294 | 361 | Cc1ccc(-c2nnc(CNC(=O)CN)o2)cc1                                                                      | 139         |
| 295 | 363 | O=C(/C=C/c1ccc(CN(CCO)CCc2cc3cccc3[nH]2)cc1)NO                                                      | 140         |
| 296 | 364 | CCCOc1ccc(C(C)=O)cc1C(=O)Nc1cc(C(=O)NO)ccc1C                                                        | 140         |
| 297 | 365 | O=C(/C=C/c1ccc2c(c1)nc(-c1cccc1)n2CCCO)NO                                                           | 141         |
| 298 | 366 | COc1ccc(NC(=O)[C@H]2Cc3ccc(OCC(=O)NO)cc3CN2C(=O)Cc2cccc2)cc1                                        | 141         |
| 299 | 368 | O=C(NO)c1cccc(NCc2cccc2)c1                                                                          | 143.4       |
| 300 | 369 | O=C(/C=C/c1ccc2c(c1)nc(COCc1cccc1)n2CCCO)NO                                                         | 145         |
| 301 | 370 | O=C(NO)c1ccc(CN2CC(=O)N(Cc3cccc3)[C@H](Cc3cccc3)C2=O)cc1                                            | 145         |
| 302 | 371 | CC[C@H](C)[C@H](NC(=O)CC(C)(C)C)C(=O)N1Cc2cc(OC(C(=O)NO)ccc2C[C@H]1C(=O)Nc1ccc(OC)cc1               | 146         |
| 303 | 373 | CC[C@H](C)[C@H](NC(=O)C1CCN(C(=O)OC(C)(C)C)CC1)C(=O)N1Cc2cc(OCC(=O)NO)ccc2C[C@H]1C(=O)Nc1ccc(OC)cc1 | 147         |
| 304 | 374 | COc1ccc(C(=O)NO)cc1NCc1ccc(Cl)cc1                                                                   | 147         |
| 305 | 375 | Nc1cccc1NC(=O)c1ccc(CNC(=O)c2[nH]c(-c3ccsc3)cc2-c2ccc(O)cc2)cc1                                     | 148         |
| 306 | 376 | Cn1c(CCc2cccc2)nc2cc(/C=C/C(=O)NO)ccc21                                                             | 148         |
| 307 | 378 | CCC(=O)CCCC[C@@H]1NC(=O)[C@H](CCCCNC(C)=O)NC(=O)C[C@H](CC(C)C)NC(=O)[C@H](Cc2c[nH]c3cccc23)NC1=O    | 150         |
| 308 | 379 | O=C(CCCCCNC(=O)Cn1cnc2c(N3CCOCC3)nc(Nc3cccc3)nc21)NO                                                | 150         |
| 309 | 380 | COc1ccc(N(C)c2cc(C#N)nc3cccc23)cc1/C=C/C(=O)NO                                                      | 150         |
| 310 | 381 | COc1ccc(C(=O)NO)cc1NC(=O)c1cccc2c1/C(=N/O)c1cccc1-2                                                 | 150         |
| 311 | 383 | CCC(=O)CCCC[C@@H]1NC(=O)[C@H](CCCCNC(C)=O)NC(=O)C[C@H](CC(C)C)NC(=O)[C@H](Cc2c[nH]c3cccc23)NC1=O    | 150         |
| 312 | 384 | O=C(NO)c1ccc(CN2CC(=O)N(Cc3cccc(Cl)c3)[C@H](Cc3cccc3)C2=O)cc1                                       | 150         |
| 313 | 385 | CN(CCc1cccc1)S(=O)(=O)c1cccc(/C=C/C(=O)NO)c1                                                        | 150         |
| 314 | 386 | COc1ccc(-c2cc(-c3ccoc3)c(C(=O)NCc3ccc(C(=O)NO)cc3)[nH]2)cc1                                         | 150         |
| 315 | 388 | O=C(NO)c1cccc(-c2sc(CSc3cccc3)n2)c1                                                                 | 150         |
| 316 | 389 | O=C(NO)c1ccc(CN(Cc2cccc2)S(=O)(=O)c2c(F)c(F)c(F)c(F)c2F)cc1                                         | 150         |
| 317 | 390 | O=C(CCCCCNC(=O)c1cnc(N(c2cccc2)c2cccc2Cl)nc1)NO                                                     | 150.6542939 |
| 318 | 391 | O=C(COc1ccc(C[C@H](NC(=O)CCc2cccc2)C(=O)Nc2cccc2)cc1)NO                                             | 151         |
| 319 | 393 | O=C(CCc1ccc(Oc2ccs2)c(O)c1)Nc1ccc(C(=O)NO)cc1                                                       | 152         |
| 320 | 394 | O=C(CCCCCCCC(=O)c1cccnc1)NO                                                                         | 153         |
| 321 | 395 | COc1ccc(-c2nnc(CNC(=O)[C@@H](C)N)o2)cc1                                                             | 153         |
| 322 | 396 | O=C(NO)c1ccc(Cn2c(=O)[nH]c(=O)c3ccc(F)cc32)cc1                                                      | 154         |
| 323 | 398 | O=C(NO)c1ccc(CN(Cc2cccc2)S(=O)(=O)c2cc(F)c(F)c(F)c2F)cc1                                            | 155         |
| 324 | 399 | O=C(NO)c1ccc(Cl)c(NC(=O)c2cccc3ccsc23)c1                                                            | 155         |
| 325 | 400 | Cc1ccc(NC(=O)[C@H](CCCCC(=O)NO)NC(=O)[C@H]2CC(C(=O)N2)cc1                                           | 156         |
| 326 | 401 | COc1ccc(C(=O)NO)cc1CS(=O)(=O)Nc1ccc2c(c1)cc(C)c(=O)n2C                                              | 158         |

|     |     |                                                                                   |             |
|-----|-----|-----------------------------------------------------------------------------------|-------------|
| 327 | 403 | CCCCC1c(-c2ccccc2)nnn1[C@@H](C1cccc1)C(=O)NO                                      | 160         |
| 328 | 404 | O=C(NO)c1ccc(NC2CCN(c3ccc(Cl)c(Cl)c3)C2=O)cc1                                     | 160         |
| 329 | 405 | CN(C)CCn1c(-c2cccc(/C=C/C(=O)NO)c2)nc2ccccc21                                     | 160         |
| 330 | 406 | CN1CCC[C@H](n2c(-c3cccc(/C=C/C(=O)NO)c3)nc3ccccc32)C1                             | 160         |
| 331 | 408 | Cc1enc(Nc2ccc(OCCN3CCCC3)cc2)nc1Nc1ccc(C(=O)NO)cc1                                | 160         |
| 332 | 409 | COc1cc(C(=O)NO)ccc1Cn1ccc2cc(C(=O)NCC34C[C@H]5C[C@@H](C3)C[C@@H](C4)C5)ccc21      | 160         |
| 333 | 410 | COc1ccc(-c2nc(NC(=O)NCCCC(=O)NO)cc3c2[nH]c2ccccc23)cc1                            | 160         |
| 334 | 411 | N#Cc1ccc(N2CCC(Nc3ccc(C(=O)NO)cc3)C2=O)cc1                                        | 160         |
| 335 | 413 | O=C(/C=C/c1ccc2c(c1)nc(-c1cnc1)n2CCCO)NO                                          | 161         |
| 336 | 414 | CC(C)(C)c1ccc(C(=O)NCc2ccc(C(=O)NO)cc2)cc1                                        | 162         |
| 337 | 415 | O=C(NO)c1ccc(CN2CC(=O)N(Cc3ccccc3Cl)[C@H](Cc3ccccc3)C2=O)cc1                      | 162         |
| 338 | 416 | COc1ccc(NC(=O)[C@@H]2Cc3ccc(OCC(=O)NO)cc3CN2C(=O)[C@H](CC(C)C)NC(=O)OC(C)(C)C)cc1 | 163         |
| 339 | 418 | CC(C)[C@@H]1NC(=O)[C@]2(C)CSC(=N2)c2csc(n2)CNC(=O)C(F)(F)[C@@H](/C=C/CCS)NC1=O    | 165.5       |
| 340 | 419 | O=C(/C=C/c1cccc(S(=O)(=O)Nc2ccccc2)c1)NO                                          | 166.8977948 |
| 341 | 420 | Cc1cc(-c2nc3sc4c(c3c(=O)[nH]2)CCN(C)C4)cc(C)c1OCCCCC(=O)NO                        | 167         |
| 342 | 421 | COc1cccc(CNc2cc(C(=O)NO)ccc2OC)c1                                                 | 167         |
| 343 | 423 | CC(C)C(C(=O)Nc1ccc(/C=C/C(=O)NO)nc1)c1cccc1                                       | 168         |
| 344 | 424 | O=C(NO)c1ccc(Cn2c(=O)n(CCc3ccccc3)c(=O)c3ccsc32)cc1                               | 169         |
| 345 | 425 | O=C(CCCCCCNc1nn2c(=O)c3ccccc3nc2c2ccccc12)NO                                      | 170         |
| 346 | 426 | N#Cc1ccc2c(c1)SC(=S)N1CCN=C21                                                     | 170         |
| 347 | 428 | CCOc1ccc(C(=O)NO)cc1NC(=O)c1cccc1                                                 | 171.5       |
| 348 | 429 | CCc1nc2cc(Cc3ccc(C(=O)NO)cc3)ccc2c(=O)n1CCc1cccc1                                 | 173         |
| 349 | 430 | Nc1cccc1NC(=O)c1ccc(CNC(=O)c2[nH]c(-c3ccc(O)cc3)cc2-c2ccoc2)cc1                   | 174         |
| 350 | 431 | CN1CCN(CCc2cn(CC3=CCC(C(=O)NO)C=C3)c3ccccc23)CC1                                  | 174         |
| 351 | 433 | COc1ccc([C@H]2[C@H](COC(=O)c3ccc(C(=O)NO)cc3)C(=O)N2c2cc(OC)c(OC)c(OC)c2)cc1O     | 177         |
| 352 | 434 | O=C(NO)c1ccc(Cl)c(C(=O)Nc2ccc(Cl)cc2)c1                                           | 177.4823935 |
| 353 | 435 | O=C(/C=C/c1ccc(CNc2ccc3nc4n(c(=O)c3e2)CCCC4)cc1)NO                                | 178         |
| 354 | 436 | O=C(NO)c1ccc(NC2CCN(c3ccc(Cl)c3)C2=O)cc1                                          | 180         |
| 355 | 438 | O=C(CCCCCNC(=O)c1esc(Br)n1)NO                                                     | 180         |
| 356 | 439 | COc1cccc2c(C(CCCCC(=O)NO)c3c[nH]c4c(OC)cccc34)c[nH]c12                            | 180         |
| 357 | 440 | C[C@]1(Nc2ccc(C(=O)NO)cc2)CCN(c2ccc(Cl)cc2)C1=O                                   | 180         |
| 358 | 441 | O=C(NO)c1cccc(-c2cn(CCc3ccccc3)nn2)c1                                             | 180         |
| 359 | 443 | O=C(NO)c1ccc(CNC(=O)c2[nH]c(-c3ccc(O)cc3)cc2-c2ccoc2)cc1                          | 180.6       |
| 360 | 444 | COc1ccc(C(=O)NO)cc1OCc1ccc(Cl)cc1                                                 | 181         |
| 361 | 445 | COc1ccc(NC(=O)[C@@H]2Cc3ccc(OCC(=O)NO)cc3CN2C(=O)[C@H](C)NC(=O)OC(C)(C)C)cc1      | 182         |
| 362 | 446 | O=C(/C=C/c1ccc(NC(=O)Cc2ccccc2)cn1)NO                                             | 183         |
| 363 | 448 | Nc1ccc(-c2nc(N3CCOCC3)c3ncn(CCCCCC(=O)NO)c3n2)cn1                                 | 184         |
| 364 | 449 | O=C(/C=C/c1cccn(CCCc2ccc3ccccc3c2)c1=O)NO                                         | 188         |
| 365 | 450 | CC(=O)SCC(=O)CCCCC(=O)Nc1cccc1                                                    | 190         |
| 366 | 451 | O=C(NO)c1ccc2c(c1)CC(NS(=O)(=O)c1ccc(Cl)cc1Cl)CC2                                 | 190         |
| 367 | 453 | O=C(NO)c1ccc(Br)c(NC(=O)c2ccccc2)c1                                               | 191.4       |
| 368 | 454 | CCn1c(C)nc2cc(/C=C/C(=O)NO)ccc21                                                  | 192         |
| 369 | 455 | CC[C@H](C)[C@H](NC(=O)[C@@H]1CCCN1C(=O)OC(C)(                                     | 192         |

|     |     |                                                                                                                                                                                           |             |
|-----|-----|-------------------------------------------------------------------------------------------------------------------------------------------------------------------------------------------|-------------|
|     |     | C)C(=O)N1Cc2cc(OCC(=O)NO)ccc2C[C@H]1C(=O)Nc1cc<br>c(OC)cc1                                                                                                                                |             |
| 370 | 456 | Cc1[nH]c2cccc2c1CCNCc1ccc(/C=C/C(=O)NO)cc1                                                                                                                                                | 193.4091649 |
| 371 | 458 | Nc1nn(-c2cccc2)nc1C(=O)NCc1ccc(C(=O)NO)cc1                                                                                                                                                | 195         |
| 372 | 459 | O=C(COc1ccc(C[C@H](NC(=O)OCc2cccc2)C(=O)Nc2cccc<br>2)cc1)NO                                                                                                                               | 197         |
| 373 | 460 | CC(C)N(CCn1c(-<br>c2cccc(/C=C/C(=O)NO)c2)nc2cccc21)C(C)C                                                                                                                                  | 200         |
| 374 | 461 | Cc1nc(-c2cccc(/C=C/C(=O)NO)c2)n(CCN2CCOCC2)c1C                                                                                                                                            | 200         |
| 375 | 463 | Cc1nc2cccc2n1Cc1ccc(C(=O)NO)cc1F                                                                                                                                                          | 200         |
| 376 | 464 | N[C@H](Cc1cccc(Cl)c1)C(=O)N1CCN(C(=O)c2cc(F)ccc2F)C<br>C1                                                                                                                                 | 200         |
| 377 | 465 | COc1ccc(-<br>c2nc(NC(=O)NCCCC(=O)NO)cc3c2[nH]c2cccc23)cc1                                                                                                                                 | 200         |
| 378 | 466 | O=C(CCCCCNC(=O)Cn1cnc2c(Nc3cccc3)nc(Nc3cccc3)nc2<br>1)NO                                                                                                                                  | 200         |
| 379 | 468 | COc1ccc2[nH]c(C)c(CC(=O)N[C@@H](CCCCC(=O)NO)C(<br>=O)NCCc3c(-c4cccc4)[nH]c4cccc34)c2c1                                                                                                    | 200         |
| 380 | 469 | O=C(NO)c1ccc(CNCc2nc(-c3cccc3)no2)cc1                                                                                                                                                     | 200         |
| 381 | 470 | O=C(/C=C/c1ccc(S(=O)(=O)c2ccc3cccc(F)c3n2)c1)NO                                                                                                                                           | 200         |
| 382 | 471 | Cn1nc2cc(/C=C/C(=O)NO)ccc21                                                                                                                                                               | 201         |
| 383 | 473 | O=C(NO)c1ccc(CN(C2CC2)S(=O)(=O)c2c(F)cc(F)c(Cl)c2F)cc<br>1                                                                                                                                | 201         |
| 384 | 474 | COc1ccc(C(=O)NO)cc1NCc1cccc(Oc2cccc2)c1                                                                                                                                                   | 202         |
| 385 | 475 | CCS/C(Nc1cccc1)=C(\C#N)C(=O)N/N=C\c1ccc(Cl)cc1Cl                                                                                                                                          | 202         |
| 386 | 476 | O=C(/C=C/c1ccc2c(c1)nc(CCc1cccc1)n2Cc1cccnc1)NO                                                                                                                                           | 202         |
| 387 | 478 | O=C(/C=C/c1ccc2c(c1)nc(C1CCCC1)n2CCCO)NO                                                                                                                                                  | 203         |
| 388 | 479 | Cc1ccc(C(=O)NO)cc1NC(=O)c1cccc1                                                                                                                                                           | 204         |
| 389 | 480 | CC[C@H](Nc1ncnc2[nH]cnc12)c1nc2cccc(NCc3ccc(C(=O)N<br>O)cn3)c2c(=O)n1-c1cccc1                                                                                                             | 204         |
| 390 | 481 | CC(C)CCN(CCCCCC(=O)NO)c1ncc(C(=O)NCCn2ccnc2)s<br>1                                                                                                                                        | 204         |
| 391 | 483 | O=C(NO)c1ccc(NC(=O)c2ccc(C3CCCC3)cc2)cc1                                                                                                                                                  | 208         |
| 392 | 484 | CCN(c1ccc(C(=O)NO)cc1)S(=O)(=O)c1cccc(C(F)(F)F)c1                                                                                                                                         | 209.4277919 |
| 393 | 485 | O=C(NO)c1ccc(NC2CCN(c3cccc3)C2=O)cc1                                                                                                                                                      | 210         |
| 394 | 486 | O=C(NO)c1cccc(C(=O)NCc2cccc2)c1                                                                                                                                                           | 210         |
| 395 | 488 | O=C(NO)c1ccc2c(c1)CC(NS(=O)(=O)c1ccc(F)cc1F)CC2                                                                                                                                           | 210         |
| 396 | 489 | CCOc1ccc(C2c3cccc3CCN2CCC(=O)NO)cc1                                                                                                                                                       | 210         |
| 397 | 490 | C#CCN(C)Cc1ccc(NC(=O)CCCCC(=O)NO)c1                                                                                                                                                       | 210         |
| 398 | 491 | CC[C@H]1OC(=O)[C@H](C)C(=O)[C@H](C)[C@@H](O[C<br>@@H]2O[C@H](C)C[C@H](N(C)Cc3ccc(-<br>c4cn(CCCCCC(=O)NO)nn4)cc3)[C@H]2O)[C@](C)(OC)C[<br>C@@H](C)C2=NCCN3C(=O)O[C@@]1(C)[C@H]3[C@H]2<br>C | 210         |
| 399 | 493 | O=C(CCCCCC(=O)Nc1cccc1CN1CC[C@H](O)C1)NO                                                                                                                                                  | 211         |
| 400 | 494 | COc1ccc(C(=O)NO)cc1NC(=O)c1cccc1Cl                                                                                                                                                        | 211.16      |
| 401 | 495 | N[C@@H](CCCCC(=O)c1cccn1)c1cnc(-c2ccc(F)cc2)n1                                                                                                                                            | 212         |
| 402 | 496 | COc1ccc(NC(=O)[C@@H]2Cc3ccc(OCC(=O)NO)cc3CN2C(=<br>O)[C@@H]2CCCN2C(=O)OC(C)(C)C)cc1                                                                                                       | 212         |
| 403 | 498 | O=C(NO)c1ccc(CN(C2CC2)S(=O)(=O)c2c(F)c(Cl)c(F)c(Cl)c2<br>F)cc1                                                                                                                            | 214         |
| 404 | 499 | O=C(NO)c1ccc(Cl)c(NC(=O)c2cccc(OCc3cccc3)c2)c1                                                                                                                                            | 214.4       |
| 405 | 500 | CC(C)(C)c1[nH]c2cccc2c1[C@H]1CCCN(Cc2ccc(/C=C/C(=<br>O)NO)cc2F)C1                                                                                                                         | 217         |
| 406 | 501 | COc1ccc(-<br>c2nc(N3CCOCC3)c3nc(CN(C)c4ncc(C(=O)NO)cn4)n(C)c3n2)<br>cn1                                                                                                                   | 217         |
| 407 | 503 | O=C(c1ccc(-c2nc(COc3ccc(-c4nnco4)cc3)no2)s1)C(F)(F)F                                                                                                                                      | 220         |

|     |      |                                                                                                                |       |
|-----|------|----------------------------------------------------------------------------------------------------------------|-------|
| 408 | 504  | <chem>CCOc1ccc(C(C)=O)cc1NC(=O)c1cc(C(=O)NO)ccc1Cl</chem>                                                      | 220   |
| 409 | 505  | <chem>O=C(NO)c1ccc(NC(=O)c2ccc(C(F)(F)F)cc2)cc1</chem>                                                         | 220   |
| 410 | 506  | <chem>CSc1ccc(C(=O)NO)cc1NC(=O)c1ccc(-c2ccccc2)cc1</chem>                                                      | 220   |
| 411 | 508  | <chem>O=C(CCCCCNc1nn2c(=O)c3cc(Br)ccc3nc2c2ccccc12)NO</chem>                                                   | 222   |
| 412 | 509  | <chem>O=C(NO)c1ccc(Cn2c(=O)[nH]c(=O)c3cc(F)ccc32)cc1</chem>                                                    | 222   |
| 413 | 510  | <chem>CN(C(=O)CN(Cc1c(F)c(F)c(F)c(F)c1F)S(=O)(=O)c1ccc(F)cc1)c1ccc(C(=O)NO)cc1</chem>                          | 224   |
| 414 | 511  | <chem>CC(C)(C)c1cc(C(=O)N(CC2CC2)c2ccc(C(=O)NO)cc2)cc(C(C)(C)C)c1</chem>                                       | 225   |
| 415 | 513  | <chem>Cc1ccc(C(=O)NO)cc1NCc1ccc(-c2ccccc2)cc1</chem>                                                           | 227   |
| 416 | 514  | <chem>COc1ccc(-c2cc(-c3ccccc3)[nH]c2C(=O)Nc2ccc(CC(=O)NO)c2)cc1</chem>                                         | 227   |
| 417 | 515  | <chem>CC(C)(C)OC(=O)N[C@@H](Cc1ccc(OCC(=O)NO)cc1)C(=O)Nc1ccccc1</chem>                                         | 227   |
| 418 | 516  | <chem>O=C(/C=C/c1ccc(C(=O)NC(Cc2[nH]c3ccccc23)C(=O)Nc2ccc(Cl)cc2)cc1)NO</chem>                                 | 229.2 |
| 419 | 518  | <chem>CC[C@H](C)[C@@H]1NC(=O)[C@@H](Cc2ccc(OC)cc2)NC(=O)[C@H](CCCCSCC(=O)C(F)(F)F)NC(=O)[C@H]2CCCN2C1=O</chem> | 230   |
| 420 | 519  | <chem>CN(C)c1ccc(C(=O)N/N=C/c2ccc(C(=O)NO)cc2)cc1</chem>                                                       | 230   |
| 421 | 520  | <chem>CCOc1ccc(C(=O)NO)cc1NC(=O)c1ccc(Cl)cc1Cl</chem>                                                          | 230   |
| 422 | 521  | <chem>COC(=O)[C@@H]1Cc2ccc(c2)C[C@H](NC(C)=O)C(=O)N[C@@H](CCCCC(=O)NO)C(=O)N1</chem>                           | 231   |
| 423 | 523  | <chem>CC(C)Cc1nc2cc(/C=C/C(=O)NO)ccc2n1CCc1ccccc1</chem>                                                       | 234   |
| 424 | 524  | <chem>O=C(/C=C/c1ccc(/C=N/OCCN2CCOCC2)cc1)NO</chem>                                                            | 235   |
| 425 | 525  | <chem>COc1ccc(C(=O)Nc2cc(C(=O)NO)ccc2Cl)cc1</chem>                                                             | 235.6 |
| 426 | 526  | <chem>O=C(/C=C/c1ccc2c(c1)NCN2CCC1=CCCC=N1)NO</chem>                                                           | 237   |
| 427 | 528  | <chem>O=C(CCCCCNc1nn2c(=O)c3cc(Cl)ccc3nc2c2ccccc12)NO</chem>                                                   | 239   |
| 428 | 529  | <chem>COc1ccc(C(=O)NO)cc1NC(=O)c1ccc(Cl)cc1</chem>                                                             | 239.7 |
| 429 | 530  | <chem>N=C(N)NCCC[C@@H]1NC(=O)C[C@H](Cc2ccc(O)cc2)NC(=O)[C@H](CC(=O)O)NC(=O)[C@H](CCCCC(=O)NO)NC1=O</chem>      | 240   |
| 430 | 531  | <chem>C=C(c1cc(OC)c(OC)c(OC)c1)c1ccc2c(c1)c(/C=C/C(=O)NO)cn2C</chem>                                           | 240   |
| 431 | 533  | <chem>O=C(CCCCC(c1c[nH]c2ccccc12)c1c[nH]c2ccccc12)NO</chem>                                                    | 240   |
| 432 | 534  | <chem>O=C(NO)c1ccc(CN(Cc2ccccc2F)S(=O)(=O)c2cc(F)c(F)c(F)c2F)cc1</chem>                                        | 241   |
| 433 | 535  | <chem>O=C(/C=C/c1ccc(C(=O)NC(Cc2[nH]c3ccccc23)C(=O)Nc2ccc(Cl)cc2)cc1)NO</chem>                                 | 243.1 |
| 434 | 536  | <chem>CC(C)(C)c1ccc(C(=O)Nc2ccc(C(=O)NO)cc2)cc1</chem>                                                         | 245   |
| 435 | 2041 | <chem>Cc1c(NC(=O)NCCN2C(=O)S/C(=C)\c3ccc([N+](=O)[O-])cc3)C2=O)c(=O)n(-c2ccccc2)n1C</chem>                     | 245   |
| 436 | 538  | <chem>Cc1ccc(C(=O)NO)cc1NCCCc1ccccc1</chem>                                                                    | 248   |
| 437 | 539  | <chem>O=C(/C=C/C1CCN(CCc2c[nH]c3ccccc23)CC1)NO</chem>                                                          | 250   |
| 438 | 540  | <chem>CC[C@H](Nc1ncnc2[nH]cnc12)c1nc2ccccc(NCc3ccc(C(=O)NO)cc3)c2c(=O)n1-c1ccccc1</chem>                       | 250   |
| 439 | 541  | <chem>CN1C(=O)C2CN(Cc3c2c2ccccc2n3Cc2ccc(C(=O)NO)cc2)C1=O</chem>                                               | 250   |
| 440 | 543  | <chem>CC(C)(C)Oc1ccc(C[C@@H]2C(=O)Nc3ccccc3N2Cc2ccc(C(=O)NO)cc2)cc1</chem>                                     | 250   |
| 441 | 544  | <chem>O=C(/C=C/c1ccc2c(c1)nc(CCc1ccccc1)n2CCCO)NO</chem>                                                       | 251   |
| 442 | 545  | <chem>O=C(CCCCC[C@H](NC(=O)C1CCCN1=O)C(=O)Nc1ccccc1)NO</chem>                                                  | 251   |
| 443 | 546  | <chem>O=C(NO)c1ccc(CN2CC3(CCCCC3)c3ccccc32)cc1</chem>                                                          | 253   |
| 444 | 548  | <chem>O=C(/C=C/c1ccc2c(c1)nc(CCc1ccccc1)n2CCN1CCCCC1)NO</chem>                                                 | 254   |
| 445 | 549  | <chem>O=C(NO)c1ccc(Cl)c(NCc2ccccc2)c1</chem>                                                                   | 254   |
| 446 | 550  | <chem>CCCCCCCC(=O)SCC/C=C(F)[C@@H]1CC(=O)NCc2nc(cs2)C2=N[C@@](C)(CS2)C(=O)N[C@@H](C(C)C)C(=O)O1</chem>         | 255   |

|     |      |                                                                                                                                                                                         |             |
|-----|------|-----------------------------------------------------------------------------------------------------------------------------------------------------------------------------------------|-------------|
| 447 | 551  | <chem>O=C(NO)c1ccc(Cn2c(=O)n(CCc3ccccc3)c(=O)c3ccccc32)c(F)c1</chem>                                                                                                                    | 255         |
| 448 | 553  | <chem>CC(C)[C@@H]1NC(=O)[C@]2(C)CSC(=N2)c2csc(n2)CNC(=O)C[C@@H]/C=C/CCS)NC1=O</chem>                                                                                                    | 255.3       |
| 449 | 554  | <chem>COc1ccccc1-c1enc(C(=O)NCCCCCCC(=O)NO)s1</chem>                                                                                                                                    | 255.89      |
| 450 | 555  | <chem>Cc1ccc(C(=O)NO)cc1NCc1ccccc1</chem>                                                                                                                                               | 260         |
| 451 | 556  | <chem>O=C(NO)c1ccc2c(c1)CC(Nc1nccc(-c3ccc(F)cc3)n1)CC2</chem>                                                                                                                           | 260         |
| 452 | 558  | <chem>Cc1ccc(CN2CCC(c3noc(CN(C)c4ncc(C(=O)NO)cn4)n3)CC2)c1</chem>                                                                                                                       | 260         |
| 453 | 559  | <chem>S=C1Sc2ccc(Br)cc2C2=NCCN12</chem>                                                                                                                                                 | 260         |
| 454 | 2042 | <chem>CN(CCOC1no[n+][[O-]])c1S(=O)(=O)c1ccccc1C(=O)c1ccc(/C=C/C(=O)NO)cc1</chem>                                                                                                        | 260         |
| 455 | 2043 | <chem>CNCCOC1no[n+][[O-]]c1S(=O)(=O)c1ccccc1</chem>                                                                                                                                     | 260         |
| 456 | 560  | <chem>COc1ccc(-c2nc3cc(/C=C/C(=O)NO)ccc3n2CC(O)CO)cc1</chem>                                                                                                                            | 262         |
| 457 | 561  | <chem>CC[C@H](C)[C@@H](CN1Cc2cc(OCC(=O)NO)ccc2C[C@H]1C(=O)Nc1ccc(OC)cc1)NC(=O)OC(C)(C)C</chem>                                                                                          | 263         |
| 458 | 563  | <chem>CC(C)(C)c1ccc(C(=O)N(Cc2ccc(C(=O)NO)cc2)C2CC2)cc1</chem>                                                                                                                          | 269         |
| 459 | 564  | <chem>COc1ccc(NC(=O)c2cc(C(=O)NO)ccc2OC)cc1</chem>                                                                                                                                      | 270         |
| 460 | 565  | <chem>Nc1ncc(-c2nc(N3CCOCC3)c3ccn(CCCCCC(=O)NO)c3n2)cn1</chem>                                                                                                                          | 270         |
| 461 | 566  | <chem>O=C(CCCCCNC(=O)NC(=O)c1ccccc1)NO</chem>                                                                                                                                           | 270         |
| 462 | 568  | <chem>O=C(NO)c1ccc(CN(C2CC2)S(=O)(=O)c2ccc(F)c(F)c(F)c2)cc1</chem>                                                                                                                      | 273         |
| 463 | 569  | <chem>CC(C)CCc1c(OCCCCCCCC(=O)NO)ccc(CCC(=O)NO)c1O</chem>                                                                                                                               | 279.5       |
| 464 | 570  | <chem>N[C@@H](CCCCC(=O)c1cccn1)c1ncc(-c2ccccc2F)[nH]1</chem>                                                                                                                            | 280         |
| 465 | 571  | <chem>COc1ccc(N(C)c2nc(C)nc3ccccc23)cc1/C=C/C(=O)NO</chem>                                                                                                                              | 280         |
| 466 | 573  | <chem>COc1ccc(C(=O)NO)cc1C(=O)Nc1ccccc(Cl)c1</chem>                                                                                                                                     | 280         |
| 467 | 574  | <chem>O=C(NO)c1ccc(CN(C2CC2)S(=O)(=O)c2ccc(F)cc2)cc1</chem>                                                                                                                             | 281         |
| 468 | 575  | <chem>O=C(NO)c1ccc(Cn2c(=O)[nH]c(=O)c3c(Cl)ccccc32)cc1</chem>                                                                                                                           | 281         |
| 469 | 576  | <chem>CCN(C(=O)c1ccc(C(C)(C)C)cc1)c1ccc(C(=O)NO)cc1</chem>                                                                                                                              | 281         |
| 470 | 578  | <chem>O=C(CCCCCCNC(=O)c1ncc(-c2ccccc2)o1)NO</chem>                                                                                                                                      | 281.32      |
| 471 | 579  | <chem>O=C(CCCCCc1nc2ccc(Br)cc2[nH]1)NO</chem>                                                                                                                                           | 282         |
| 472 | 580  | <chem>CCc1nc2c(Cc3ccc(C(=O)NO)cc3)ccccc2c(=O)n1CCc1ccccc1</chem>                                                                                                                        | 282         |
| 473 | 581  | <chem>O=C(/C=C/c1ccc(CNC(=O)c2c(F)c(F)c(F)c(F)c2F)cc1)NO</chem>                                                                                                                         | 283         |
| 474 | 583  | <chem>O=C(CCCCCC1OCCCCCCCCOc2ccccc2NC1=O)NO</chem>                                                                                                                                      | 286         |
| 475 | 584  | <chem>Cc1ccc(C(=O)NO)cc1NCc1ccccc1Cl</chem>                                                                                                                                             | 286         |
| 476 | 585  | <chem>COc1ccc([C@H]2[C@H](COC(=O)CCC(=O)NO)C(=O)N2c2c(c(OC)c(OC)c(OC)c2)cc1O</chem>                                                                                                     | 288         |
| 477 | 586  | <chem>COc1cc(OC)cc(N(CCNC(C)C)c2ccc3ncc(-c4enn(CCOc5ccc(C(=O)NO)cc5)e4)nc3c2)c1</chem>                                                                                                  | 288         |
| 478 | 588  | <chem>O=C(NO)c1ccc(CN2CCC(CN[C@@H]3C[C@H]3c3ccccc3)C2)cc1</chem>                                                                                                                        | 290         |
| 479 | 589  | <chem>O=C(CCC(CCCC(=O)Nc1ccccc1)c1ccccc1)NO</chem>                                                                                                                                      | 290         |
| 480 | 590  | <chem>CCOc1cc(C)nc(NC2CCc3ccc(C(=O)NO)cc3C2)n1</chem>                                                                                                                                   | 290         |
| 481 | 591  | <chem>C#CCOc1ccc(/C=N/NC(=O)CCCCCCC(=O)NO)cc1</chem>                                                                                                                                    | 290         |
| 482 | 593  | <chem>O=C(NO)c1ccc(Cl)c(NC(=O)c2ccc(Cl)cc2)c1</chem>                                                                                                                                    | 292         |
| 483 | 594  | <chem>CCS/C(Nc1ccccc1)=C(\C#N)C(=O)Nc1ccc(OC)cc1</chem>                                                                                                                                 | 295         |
| 484 | 595  | <chem>O=C(/C=C/c1ccc2c(c1)nc(COCc1ccccc1)n2CCc1cccn1)NO</chem>                                                                                                                          | 300         |
| 485 | 596  | <chem>Cc1ccc(S(=O)(=O)Nc2ccc(/C=C/C(=O)NO)cc2)cc1</chem>                                                                                                                                | 300         |
| 486 | 598  | <chem>O=C(NO)c1ccc2c(c1)CC(Nc1nccc(-c3ccccc3Cl)n1)CC2</chem>                                                                                                                            | 300         |
| 487 | 599  | <chem>O=C(/C=C/c1ccc(NS(=O)(=O)c2ccc(Cl)cc2Cl)cc1)NO</chem>                                                                                                                             | 300         |
| 488 | 600  | <chem>O=C(NO)c1ccc2c(c1)CC(Nc1nccc(C(F)(F)F)n1)CC2</chem>                                                                                                                               | 300         |
| 489 | 601  | <chem>O=C(NO)c1ccc(Cn2c(=O)[nH]c(=O)c3ccc(C(F)(F)F)cc32)cc1</chem>                                                                                                                      | 302         |
| 490 | 603  | <chem>O=C(NO)c1ccc(Cn2c(=O)n(CCc3ccccc3)c(=O)c3ccccc32)cc1</chem>                                                                                                                       | 309         |
| 491 | 604  | <chem>O=C(/C=C/c1ccc(-c2ccc(O)cc2)cc1)NO</chem>                                                                                                                                         | 309.1601527 |
| 492 | 605  | <chem>CC[C@H]1OC(=O)[C@H](C)C(=O)[C@H](C)[C@@H](O[C@@H]2O[C@H](C)C[C@H](N(C)Cc3ccccc(-c4cn(CCCCCC(=O)NO)nn4)c3)[C@H]2O)[C@@](C)(OC)C[C@@H](C)C2=NCCN3C(=O)O[C@@]1(C)[C@H]3[C@H]2</chem> | 310         |

|     |     | C                                                                                                                                                                                                               |        |
|-----|-----|-----------------------------------------------------------------------------------------------------------------------------------------------------------------------------------------------------------------|--------|
| 493 | 606 | O=C(/C=C/c1cccc(-c2nc3ccccc3n2CC2CCNCC2)c1)NO                                                                                                                                                                   | 310    |
| 494 | 608 | O=C(CCCCC(=O)Nc1ccc2c(c1)/C(=C/c1ccc[nH]1)C(=O)N2)NO                                                                                                                                                            | 312    |
| 495 | 609 | O=C(CCCCCN(c1cccc1)c1ccc2ccccc2n1)NO                                                                                                                                                                            | 312    |
| 496 | 610 | COCCCN1c(Cc2ccccc2)nc2cc(/C=C/C(=O)NO)ccc21                                                                                                                                                                     | 313    |
| 497 | 611 | CC[C@H]1OC(=O)[C@@H](C)[C@H](O[C@H]2C[C@@](C)(OC)[C@@H](O)[C@H](C)O2)[C@H](C)[C@H](O[C@H]2O[C@@H](C)C[C@@H](N(C)Cc3ccc(-c4cn(CCCCCC(=O)NO)nn4)cc3)[C@@H]2O)[C@@](C)(O)C[C@H](C)CN(C)[C@@H](C)[C@H](O)[C@@]1(C)O | 314    |
| 498 | 613 | O=C(NO)c1ccc(CN(Cc2ccccc2)S(=O)(=O)c2cc(F)c(F)c(F)c2F)cc1                                                                                                                                                       | 316    |
| 499 | 614 | O=C1CC[C@H](C(=O)N[C@@H](CCCCS)C(=O)Nc2cccc(C(F)(F)F)c2)N1                                                                                                                                                      | 316    |
| 500 | 615 | O=C(NO)c1ccc(Cn2cc(CN3CCCC3)c3ccccc32)cc1                                                                                                                                                                       | 316.23 |
| 501 | 616 | O=C(NO)c1ccc(F)c(NC(=O)c2ccccc2)c1                                                                                                                                                                              | 317.8  |
| 502 | 618 | CC[C@H](Nc1ncnc2[nH]cnc12)c1nc2cccc(CNc3ncc(C(=O)NO)cn3)c2c(=O)n1-c1ccccc1                                                                                                                                      | 320    |
| 503 | 619 | O=C(CCCCCCNc1ccc2ccccc2c1)NO                                                                                                                                                                                    | 320    |
| 504 | 620 | O=C(CCCCCN1enc2c(N3CCOCC3)nc(-c3ccccc3CO)c3)nc21)NO                                                                                                                                                             | 320    |
| 505 | 621 | O=C(/C=C/c1cccc(-c2ccc(O)cc2)c1)NO                                                                                                                                                                              | 320    |
| 506 | 623 | O=C(NO)c1ccc2c(c1)CC(Nc1nccc(-c3ccc(N4CCOCC4)nc3)n1)CC2                                                                                                                                                         | 320    |
| 507 | 624 | O=C(NO)c1ccc(Cn2nnc(-c3ncccn3)n2)cc1                                                                                                                                                                            | 320    |
| 508 | 625 | C#Cc1nc(C(=O)NCCCCCCC(=O)NO)es1                                                                                                                                                                                 | 320    |
| 509 | 626 | O=C(NO)c1ccc(Cn2cc(Cc3ccccc3)c3ccccc32)cc1                                                                                                                                                                      | 324    |
| 510 | 628 | O=C(CCCCCN(CCCc1ccccc1)C(=O)NC(=O)c1ccccc1)NO                                                                                                                                                                   | 328    |
| 511 | 629 | O=C(/C=C/c1ccc2c(c1)nc(Cc1ccccc1)n2CCc1ccccc1)NO                                                                                                                                                                | 329    |
| 512 | 630 | C#CCN(C)CCCOc1ccc(NC(=O)CCCCCCC(=O)NO)cc1Cl                                                                                                                                                                     | 330    |
| 513 | 631 | COc1ccc(COC(CCCCCC(=O)NO)C(=O)Nc2ccccc2)cc1                                                                                                                                                                     | 331    |
| 514 | 633 | CC[C@H](C)[C@@H](CN1Cc2cc(OCC(=O)NO)ccc2C[C@H]1C(=O)Nc1ccc(OC)cc1)NC(=O)CC(C)(C)C                                                                                                                               | 333    |
| 515 | 634 | O=C(NO)c1ccc(CN(C2CC2)S(=O)(=O)c2cc(F)c(F)c(F)c2F)cc1                                                                                                                                                           | 334    |
| 516 | 635 | CNC(=O)CCCCCN1nc(-c2ccc3oc(N)nc3e2)c2c(N)ncnc21                                                                                                                                                                 | 334    |
| 517 | 636 | Cc1ccc(C(=O)NO)cc1NCc1c(Cl)ccccc1Cl                                                                                                                                                                             | 335    |
| 518 | 638 | COc1cc(-c2nc3cc(/C=C/C(=O)NO)ccc3n2CC(O)CO)ccc1OCc1ccccc1                                                                                                                                                       | 336    |
| 519 | 639 | O=C(CCN1CCc2ccccc2C1c1ccc(C(F)(F)F)c1)NO                                                                                                                                                                        | 340    |
| 520 | 640 | C=C(c1ccc(OC)c(/C=C/C(=O)NO)c1)c1cc(OC)c(OC)c(OC)c1                                                                                                                                                             | 340    |
| 521 | 641 | O=C(NO)c1ccc(CNC(=O)c2[nH]c(-c3ccc(O)cc3)cc2-c2ccsc2)cc1                                                                                                                                                        | 340.1  |
| 522 | 643 | O=C(NO)c1ccc(C(F)(F)F)c(NC(=O)c2ccccc2)c1                                                                                                                                                                       | 342.2  |
| 523 | 644 | COc1cc(/C=C2SC(=O)N(CCN(C(=O)Nc3c(C)n(C)n(-c4ccccc4)c3=O)C2=O)cc(OC)c1OC                                                                                                                                        | 344    |
| 524 | 645 | O=C(/C=C/c1ccc2c(c1)nc(-c1cccn1)n2CC(O)CO)NO                                                                                                                                                                    | 344    |
| 525 | 646 | COc1ccc2c(c1)c(CC(=O)NCCCCC(=O)NO)c(C)n2C(=O)c1cc(Cl)cc1                                                                                                                                                        | 345    |
| 526 | 648 | O=C(CCCCC(=O)NCCCN1c2ccccc2CCc2ccc(Cl)cc21)NO                                                                                                                                                                   | 345    |
| 527 | 649 | O=C(/C=C/c1ccc2c(c1)NC(Cc1ccccc1)N2CCN1CCOCC1)NO                                                                                                                                                                | 345    |
| 528 | 650 | Cc1ccc(-c2nc(CNc3ccc(C(=O)NO)cc3)n(-c3ccccc3)n2)s1                                                                                                                                                              | 349    |
| 529 | 651 | CC(C)(C)OC(=O)NCCCC[C@H](NC(=O)OC(C)(C)C)C(=O)N1CC2(C[C@H]1C(=O)NCCCCC(=O)NO)SCCS2                                                                                                                              | 350    |
| 530 | 653 | CCCCNNC(=O)c1ccc(-c2ccc(CNC(C)=O)cc2)cc1                                                                                                                                                                        | 350    |
| 531 | 654 | O=C(NO)c1ccc2c(c1)CC(NS(=O)(=O)c1ccccc1)CC2                                                                                                                                                                     | 350    |
| 532 | 655 | O=C(NO)c1cccc(-c2cn(Cc3ccccc3)nn2)c1                                                                                                                                                                            | 350    |

|     |      |                                                                                                                                   |             |
|-----|------|-----------------------------------------------------------------------------------------------------------------------------------|-------------|
| 533 | 656  | O=C(CCCCCN(Cc1ccc(F)cc1)c1ncc(C(=O)NCCCN2ccnc2)s1)NO                                                                              | 351         |
| 534 | 658  | CN(C)CC(C)(C)Cn1c(Cc2ccccc2)nc2cc(/C=C/C(=O)NO)ccc21                                                                              | 353         |
| 535 | 659  | CC[C@H](Nc1ncnc2[nH]cnc12)c1nc(CCCCC(=O)NO)c2ccccc2n1                                                                             | 353         |
| 536 | 660  | O=C(/C=C/c1ccc(C(=O)NO)cc1)N[C@@H](Cc1c[nH]c2ccccc12)C(=O)Nc1ccc(Br)cc1                                                           | 354.2       |
| 537 | 661  | COc1cc(Cn2c(Cc3ccccc3)nc3cc(/C=C/C(=O)NO)ccc32)cc(O)C1OC                                                                          | 355         |
| 538 | 663  | CCCCCCCC(=O)SCC/C=C/[C@@H]1CC(=O)NCc2nc(cs2)C2=N[C@@](C)(CS2)C(=O)N[C@@H](C(C)C)C(=O)O1                                           | 357.9944134 |
| 539 | 664  | CCCCNNC(=O)c1ccc(-c2ccc(CNC(C)=O)cc2)cc1                                                                                          | 360         |
| 540 | 665  | Cc1ccc(NC(=O)[C@H](CCCCS)NC(=O)[C@@H]2CCCC(=O)N2)cc1                                                                              | 360         |
| 541 | 666  | O=C(NO)[C@@H]1[C@H](c2ccccc2)[C@H]1c1ccc(-c2ncoc2)cc1                                                                             | 360         |
| 542 | 668  | O=C(/C=C/c1ccc2c(c1)nc(Cc1cccc1)n2Cc1cccc1)NO                                                                                     | 366         |
| 543 | 669  | O=C(NO)c1ccc(CN(Cc2ccc(F)cc2)S(=O)(=O)c2c(F)c(F)c(F)c(F)c2F)cc1                                                                   | 367         |
| 544 | 670  | O=C(NO)c1ccc2c(c1)CC(NS(=O)(=O)c1cccc(C(F)(F)F)c1)CC2                                                                             | 370         |
| 545 | 671  | CC[C@H](C)[C@@H]1NC(=O)[C@@H](Cc2ccc(OC)cc2)NC(=O)[C@H](CCCCC(=O)C(F)(F)F)NC(=O)[C@H]2CCCN2C1=O                                   | 370         |
| 546 | 673  | N#Cc1ccc2c(c1)SC(=S)N1CCCN=C21                                                                                                    | 370         |
| 547 | 674  | CN(C)Cc1c(C(=O)NCCOc2ccc(C(=O)NO)cc2)oc2ccccc12                                                                                   | 370         |
| 548 | 675  | O=C(NO)c1ccc(Cn2c(=O)[nH]c(=O)c3cc(Br)ccc32)cc1                                                                                   | 371         |
| 549 | 676  | O=C(CCCCCS)NCc1ccc(C(F)(F)F)cc1                                                                                                   | 373         |
| 550 | 678  | O=C(NO)c1ccc(CC(=O)N(CCO)C(=O)Cc2ccccc2)cc1                                                                                       | 376         |
| 551 | 679  | O=C(NO)c1ccc(CN(C2CC2)S(=O)(=O)c2c(F)c(F)cc(F)c2F)cc1                                                                             | 378         |
| 552 | 680  | COc1cc(OC)c2c(N3CCN(C)CC3)nc(-c3cc(C)c(OCCCCC(=O)NO)c(C)c3)nc2c1                                                                  | 378.2       |
| 553 | 681  | COc1cccc2c1C(=O)c1c(O)c3c(c(O)c1C2=O)C[C@@](O)(C(C)=O)C[C@@H]3O[C@H]1C[C@H](NCc2ccc(-c3cn(CCCCCC(=O)NO)mn3)cc2)[C@H](O)[C@H](C)O1 | 379         |
| 554 | 683  | COc1ccc2[nH]cc(Cn3cc(COc4ccc(/C=C/C(=O)NO)cc4OC)mn3)c2c1                                                                          | 380         |
| 555 | 684  | CN1CCC(C(=O)N[C@@H](CCCCC(=O)c2nccs2)c2ncc(-c3ccc(F)cc3)[nH]2)CC1                                                                 | 380         |
| 556 | 2045 | O=C(NO)c1ccc(CNCc2nc(-c3ccc([N+](=O)[O-])cc3)no2)cc1                                                                              | 380         |
| 557 | 685  | CC[C@H](Nc1ncnc2[nH]cnc12)c1nc2cccc(CCCCC(=O)NO)c2c(=O)n1-c1cccc1                                                                 | 385         |
| 558 | 686  | COc1ccc(S(=O)(=O)NC2CCc3ccc(C(=O)NO)cc3C2)cc1OC                                                                                   | 390         |
| 559 | 688  | COc1ccc2c(C(=O)c3cc(OC)c(OC)c(OC)c3)cn(Cc3ccc(C(=O)NO)cc3)c2c1                                                                    | 390         |
| 560 | 689  | O=C(CCN1CCc2ccccc2C1c1ccc2ccccc12)NO                                                                                              | 390         |
| 561 | 690  | COC(=O)Cc1c(C)n(Cc2ccc(-c3cn(CCCCCC(=O)NO)mn3)cc2)c2ccc(OC)cc12                                                                   | 394         |
| 562 | 691  | Cc1cc2ccccc2n1Cc1ccc(C(=O)NO)cc1                                                                                                  | 397         |
| 563 | 693  | CN(C)Cc1en(Cc2ccc(C(=O)NO)cc2)c2ccccc12                                                                                           | 398.11      |
| 564 | 694  | Cn1ncc1-c1en(Cc2ccc(C(=O)NO)cc2)c2ccccc12                                                                                         | 398.11      |
| 565 | 695  | COc1cc2ccn(CCOc3ccc(NC(=O)CCCCC(=O)NO)cc3)c2cc1OC                                                                                 | 398.3       |
| 566 | 696  | O=C(Cc1ccc(CCCc2ccc(C(F)(F)F)c2)cc1)NO                                                                                            | 400         |
| 567 | 698  | CCN1CCC[C@@H](n2c(-c3ccccc3)nc(C)c2-c2ccccc(/C=C/C(=O)NO)c2)C1                                                                    | 400         |
| 568 | 699  | O=C(CCCCCCNC(=O)c1c(-c2ccc(O)cc2)sc2cc(O)ccc12)NO                                                                                 | 400         |
| 569 | 700  | O=C(/C=C/c1cccc(-c2nc3ccccc3n2CCN2CCOCC2)c1)NO                                                                                    | 400         |

|     |      |                                                                                    |             |
|-----|------|------------------------------------------------------------------------------------|-------------|
| 570 | 701  | <chem>O=C(NO)c1ccc(Cn2c(=O)n(Cc3ccccc3O)c(=O)c3ccccc32)cc1</chem>                  | 400         |
| 571 | 703  | <chem>COc1cc(OC)c2c(N3CCS(=O)(=O)CC3)nc(-c3cc(C)c(OCCCCC(=O)NO)c(C)c3)nc2c1</chem> | 403.5       |
| 572 | 704  | <chem>O=C(CCCCCCNC(=O)NC(=O)c1ccccc1)NO</chem>                                     | 405         |
| 573 | 705  | <chem>O=C(CCCCCC(=O)Nc1cccc(-c2nmm2CC(O)c2cccc(Br)c2)c1)NO</chem>                  | 406         |
| 574 | 706  | <chem>O=C(NO)c1ccc(CNc2nccc(-c3ccnc3)n2)cc1</chem>                                 | 410         |
| 575 | 708  | <chem>O=C(Cc1ccc(CCCCc2ccc3[nH]ccc3c2)cc1)NO</chem>                                | 410         |
| 576 | 709  | <chem>CCN(c1ccc(C(=O)NO)cc1)S(=O)(=O)c1cc(C(F)(F)F)cc(C(F)(F)F)c1</chem>           | 410.4582805 |
| 577 | 710  | <chem>O=C(NO)c1ccc(CN(Cc2cccc(F)c2)S(=O)(=O)c2cc(F)c(F)c(F)c2F)cc1</chem>          | 412         |
| 578 | 711  | <chem>O=C(/C=C/c1ccc2c(c1)nnc2Cc1ccccc1)NO</chem>                                  | 412         |
| 579 | 713  | <chem>O=C(NO)c1ccc(Cn2ccc3ccccc32)cc1</chem>                                       | 417         |
| 580 | 714  | <chem>O=C(NO)c1ccc(CN2c3ccccc3NC(=O)[C@H]2Cc2ccc(F)c(F)c2)cc1</chem>               | 420         |
| 581 | 715  | <chem>O=C(NO)c1cccc(C(=O)NCCc2ccnc2)c1</chem>                                      | 420         |
| 582 | 716  | <chem>CCCCCCC(CCCC(=O)NO)CCC(=O)Nc1ccccc1</chem>                                   | 420         |
| 583 | 718  | <chem>CC(C)c1cc(C(=O)N2Cc3ccc(NC4ccc(C(=O)NO)cc4)cc3C2)c(O)cc1O</chem>             | 420         |
| 584 | 719  | <chem>O=C(/C=C/C1CCN(Cc2cccc3ccccc23)CC1)NO</chem>                                 | 420         |
| 585 | 720  | <chem>O=C(/C=C/c1ccc(CN(C(=O)c2c(F)c(F)c(F)c2F)C2CC2)cc1)NO</chem>                 | 420         |
| 586 | 721  | <chem>Cc1nc2c(/C=C/C(=O)NO)cccc2c(=O)n1-c1ccccc1</chem>                            | 420         |
| 587 | 2046 | <chem>CC(CNC(=O)c1ccc(/C=C/C(=O)NO)cc1)Oc1no[n+](O-c1S(=O)(=O)c1ccccc1</chem>      | 420         |
| 588 | 723  | <chem>CN(C)CCc1cn(Cc2ccc(C(=O)NO)cc2)c2ccccc12</chem>                              | 422         |
| 589 | 724  | <chem>CC(C)c1cc(C(=O)N(C)c2ccc(NC(=O)CCCCC(=O)NO)cc2)c(O)cc1O</chem>               | 422         |
| 590 | 725  | <chem>O=C(/C=C/c1ccc(C(=O)NC(Cc2c[nH]c3ccccc23)C(=O)Nc2ccc(Br)cc2)cc1)NO</chem>    | 423.1       |
| 591 | 726  | <chem>O=C(NO)c1ccc(Cn2c(=O)n(Cc3ccccc(F)c3)c(=O)c3ccccc32)cc1</chem>               | 429         |
| 592 | 728  | <chem>COc1ccc(-c2nc(NC(=O)NCCC(=O)NO)cc3c2[nH]c2ccccc23)cc1</chem>                 | 430         |
| 593 | 729  | <chem>O=C(NO)C1=CCCCC1</chem>                                                      | 431         |
| 594 | 730  | <chem>O=C(CCCCCC(=O)Nc1cccc(-c2nmm2Cc2ccccc2)c1)NO</chem>                          | 433         |
| 595 | 731  | <chem>CCOc1ccc(C(=O)Nc2cc(C(=O)NO)ccc2OC)cc1</chem>                                | 438.4       |
| 596 | 733  | <chem>O=C(CCCCCC(=O)Nc1cccc(-c2cn(CC(O)c3cccc(Br)c3)mm2)c1)NO</chem>               | 440         |
| 597 | 734  | <chem>O=C(NO)c1ccc2c(c1)nc(Cc1ccccc1)n2CCCO</chem>                                 | 441         |
| 598 | 735  | <chem>O=C(/C=C/c1ccc(CNCc2ccc3ccccc3n2)cc1)NO</chem>                               | 442         |
| 599 | 736  | <chem>COc1ccc(C(=O)NO)cc1S(=O)(=O)Nc1ccc2c(c1)cc(C)c(=O)n2C</chem>                 | 443         |
| 600 | 738  | <chem>O=C(NO)c1ccc(Cl)c(NC(=O)c2cccc(Oc3ccccc3)c2)c1</chem>                        | 448.6       |
| 601 | 739  | <chem>O=C(NO)c1ccc(Cl)c(NC(=O)c2ccc(-c3ccccc3)cc2)c1</chem>                        | 450         |
| 602 | 740  | <chem>O=C1CCC[C@H](C(=O)N[C@@H](CCCCS)C(=O)NC2CCC2)N1</chem>                       | 450         |
| 603 | 741  | <chem>COc1ccc(C(=O)CCCCC(=O)NO)cc1</chem>                                          | 450         |
| 604 | 743  | <chem>O=C(CCn1c(=O)n(CCc2ccccc2)c(=O)c2ccccc21)NO</chem>                           | 454         |
| 605 | 744  | <chem>O=C(/C=C/c1ccc(Cc2ccc(O)c(Cl)c2)cc1)NO</chem>                                | 460         |
| 606 | 2047 | <chem>O=C(/C=C/c1ccc(C(=O)NCCCOc2no[n+](O-c1)2S(=O)(=O)c2ccccc2)cc1)NO</chem>      | 460         |
| 607 | 745  | <chem>CCC/C=C/c1c(-c2ccccc2)nmm1[C@@H](Cc1ccccc1)C(=O)NO</chem>                    | 464         |
| 608 | 746  | <chem>Cc1cc2cc(NS(=O)(=O)Cc3ccccc(C(=O)NO)c3)ccc2n(C)c1=O</chem>                   | 465         |
| 609 | 748  | <chem>O=C(CCCCCn1ccc(-c2nnc3[nH]ccc23)cn1)NO</chem>                                | 469         |
| 610 | 749  | <chem>O=C(NO)c1ccc2c(c1)CC(NS(=O)(=O)c1ccc(Cl)c(Cl)c1)CC2</chem>                   | 470         |

|     |      |                                                                                                                |             |
|-----|------|----------------------------------------------------------------------------------------------------------------|-------------|
| 611 | 750  | <chem>O=C(/C=C/c1ccccc1Oe1c(Cl)cccc1Cl)NO</chem>                                                               | 470         |
| 612 | 751  | <chem>O=C(/C=C/C1CCN(Cc2cccc(Cl)c2)CC1)NO</chem>                                                               | 470         |
| 613 | 753  | <chem>COc1cc(C(=O)NO)ccc1CN(C(C)C)S(=O)(=O)c1cc(F)c(F)c(F)c1F</chem>                                           | 474         |
| 614 | 754  | <chem>O=C(NO)c1ccc(CN(CCCCO)C(=O)Nc2ccccc2)cc1</chem>                                                          | 478         |
| 615 | 755  | <chem>O=C(NO)c1ccc2c(c1)CC(Nc1nccc(-c3nc4ccccc4c3)n1)CC2</chem>                                                | 480         |
| 616 | 756  | <chem>CC(C)(C)c1ccc(C2c3ccccc3CCN2CCC(=O)NO)cc1</chem>                                                         | 480         |
| 617 | 758  | <chem>COc1ccc(C(=O)NO)cc1NCc1ccc2ccccc2n1</chem>                                                               | 481         |
| 618 | 2048 | <chem>[N-]=[N+]=NCc1cc(N=[N+]=[N-])cc(C(=O)Nc2ccc(Cn3cc(NC(=O)CCCCCCC(=O)NO)cn3)cc2)c1</chem>                  | 487         |
| 619 | 759  | <chem>CCN(CC)Cc1ccc(Cn2c(=O)c(OCc3ccc(C(=O)NO)cc3)c(-c3ccccc3)c3ccccc32)cc1</chem>                             | 490         |
| 620 | 760  | <chem>NCc1ccc(NC(=O)N(CCCCO)C2ccc(C(=O)NO)cc2)cc1</chem>                                                       | 498         |
| 621 | 761  | <chem>O=C(CCCCCC(=O)c1ccccc1)NO</chem>                                                                         | 500         |
| 622 | 763  | <chem>S=c1[nH]cc(-c2ccccc2)[nH]1</chem>                                                                        | 500         |
| 623 | 764  | <chem>COc1ccc(NC(=O)[C@@H]2Cc3ccc(OCC(=O)NO)cc3CN2C(=O)CCc2ccccc2)cc1</chem>                                   | 502         |
| 624 | 765  | <chem>O=C(NO)c1cc(F)c(Cn2nnc(-c3ncccn3)n2)c(F)c1</chem>                                                        | 504         |
| 625 | 766  | <chem>CCN(C(=O)c1ccc(C(=O)NO)cc1)c1cccc(C(C)(C)C)c1</chem>                                                     | 508.7573095 |
| 626 | 768  | <chem>O=C(NO)c1ccc(-c2cnnn2CC23CC4CC(CC(C4)C2)C3)s1</chem>                                                     | 510         |
| 627 | 769  | <chem>COc1ccc(C(=O)NO)cc1NC(=O)Cc1ccccc1</chem>                                                                | 512.2       |
| 628 | 770  | <chem>COc1ccc(NC(=O)[C@@H]2Cc3ccc(OCC(=O)NO)cc3CN2C(=O)CNC(=O)OC(C)(C)C)cc1</chem>                             | 514         |
| 629 | 771  | <chem>COc1ccc(/C=C2\SC(=O)N(CCNC(=O)Nc3c(C)n(C)n(-c4ccccc4)c3=O)C2=O)cc1</chem>                                | 517         |
| 630 | 773  | <chem>COc1ccc(-c2ccccc2NC3CCc4ccc(C(=O)NO)cc4C3)n2)c1</chem>                                                   | 520         |
| 631 | 774  | <chem>Cc1ccc(-c2ccc(C(=O)NCCCCCCC(=O)NO)nn2-c2ccc(S(N)(=O)=O)cc2)cc1</chem>                                    | 520         |
| 632 | 775  | <chem>S=C1Sc2cccc(Br)c2C2=NCCCN12</chem>                                                                       | 520         |
| 633 | 776  | <chem>Cc1ccc(-c2ccccc2NC3CCc4ccc(C(=O)NO)cc4C3)n2)c1</chem>                                                    | 520         |
| 634 | 778  | <chem>Cc1ccccc1NC(=O)CCCCCCC(=O)NO)c1</chem>                                                                   | 523         |
| 635 | 779  | <chem>COc1ccccc1CCn1c(=O)c2ccccc2n(Cc2ccc(C(=O)NO)cc2)c1=O</chem>                                              | 525         |
| 636 | 780  | <chem>O=C(CCCCCC(=O)Nc1ccc(-c2cnnn2Cc2ccc(F)cc2)c1)NO</chem>                                                   | 529         |
| 637 | 781  | <chem>C[C@H](NC(=O)[C@H](CC(=O)NCCC(C)(C)C)NC(=O)c1ccc(C(=O)NO)cc1)C(=O)NCc1ccccc1</chem>                      | 530         |
| 638 | 783  | <chem>CC(C)C[C@H]1CC(=O)N[C@@H](Cc2ccccc2)C(=O)N[C@@H](CCCCC(=O)O)C(=O)N[C@@H](Cc2ccccc3ccccc23)C(=O)N1</chem> | 530         |
| 639 | 784  | <chem>O=C(/C=C/c1ccc(CNCCCN2c3ccccc3CCc3ccc(Cl)cc32)cc1)NO</chem>                                              | 533         |
| 640 | 785  | <chem>O=C(CCCCCCNC(=O)c1c(-c2ccc(O)cc2)sc2cc(O)ccc12)NO</chem>                                                 | 536.2835071 |
| 641 | 786  | <chem>O=C(/C=C/c1ccc2c(c1)nc(-c1ccsc1)n2CCCO)NO</chem>                                                         | 537         |
| 642 | 788  | <chem>S=C1Sc2ccc(Cl)cc2C2=NCCCN12</chem>                                                                       | 540         |
| 643 | 789  | <chem>CC(C)(C)OC(=O)n1cnc(C[C@@H]2NC(=O)[C@]3(C)CSC(=N3)c3csc(n3)CNC(=O)C[C@@H](/C=C/CCS)OC2=O)c1</chem>       | 540         |
| 644 | 790  | <chem>Cc1ccc(-c2ccc(C(=O)NCCCCC(=O)NO)nn2-c2ccc(S(N)(=O)=O)cc2)cc1</chem>                                      | 544         |
| 645 | 791  | <chem>CN1C(=O)CC[C@@H]1C(=O)N[C@@H](CCCCC)C(=O)Nc1ccccc1</chem>                                                | 545         |
| 646 | 793  | <chem>O=C(CCCCCCNCc1ccc(-c2ccccc2)s1)NO</chem>                                                                 | 550         |
| 647 | 794  | <chem>CCN(CC)Cc1ccc(Cn2c(=O)c(OCc3ccc(C(=O)NO)cc3)c(-c3ccccc3)c3ccccc32)cc1</chem>                             | 550         |
| 648 | 795  | <chem>CCN(C(=O)c1ccccc1C(F)(F)F)c1ccc(C(=O)NO)cc1</chem>                                                       | 550.3308096 |
| 649 | 796  | <chem>O=C(CCCCCC(=O)Nc1ccc(-c2cn(Cc3ccc(F)cc3)nn2)c1)NO</chem>                                                 | 552         |
| 650 | 798  | <chem>COc1ccc(C(=O)NO)cc1NCc1ccc2c(c1)cc(C)c(=O)n2C</chem>                                                     | 555         |
| 651 | 799  | <chem>CCCN(C(=O)c1ccc(NC(=O)[C@H](Cc2c[nH]c3ccccc23)NC(</chem>                                                 | 557.3       |

|     |     |                                                                                                                                                                                                                               |             |
|-----|-----|-------------------------------------------------------------------------------------------------------------------------------------------------------------------------------------------------------------------------------|-------------|
|     |     | =O)c2ccc(OC)cc2)cc1                                                                                                                                                                                                           |             |
| 652 | 800 | COc1ccc(-c2cc(-<br>c3ccccc3])[nH]c2C(=O)NCc2ccc(C(=O)Nc3ccccc3S)cc2)cc1                                                                                                                                                       | 559         |
| 653 | 801 | Cc1cc2cc(NS(=O)(=O)c3cc(C(=O)NO)ccc3Cl)ccc2n(C)c1=O                                                                                                                                                                           | 560         |
| 654 | 803 | CC12CC3CC(C)(C1)CC(NS(=O)(=O)c1cccc(/C=C/C(=O)NO)<br>c1)(C3)C2                                                                                                                                                                | 562         |
| 655 | 804 | Oc1cccn(CCCCCCn2cc(-c3ccccc3)nn2)c1=S                                                                                                                                                                                         | 565.2114649 |
| 656 | 805 | O=C(NO)c1ccc(NC(=O)c2ccc(F)cc2)cc1                                                                                                                                                                                            | 567         |
| 657 | 806 | COc1ccc(-<br>c2nc(NC(=O)NCCCC(=O)NO)cc3c4ccccc4n(C)c23)cc1                                                                                                                                                                    | 570         |
| 658 | 808 | CN(C(=O)CN(C)S(=O)(=O)c1ccc(F)cc1)c1ccc(C(=O)NO)cc1                                                                                                                                                                           | 573         |
| 659 | 809 | Cc1[nH]c2ccccc2c1/C=C/c1cccc1-c1ccc(/C=C/C(=O)NO)cc1                                                                                                                                                                          | 580         |
| 660 | 810 | CC[C@H]1OC(=O)[C@H](C)C(=O)[C@H](C)[C@@H](O[C@<br>@@H]2O[C@H](C)C[C@H](N(C)Cc3ccc(-<br>c4cn(CCCCCC(=O)NO)nn4)cc3)[C@H]2O)[C@](C)(OC)C<br>[C@@H](C)C2=NCCN3C(=O)O[C@@]1(C)[C@H]3[C@H]2<br>C                                    | 580         |
| 661 | 811 | O=C(COc1ccc2c(c1)CN(C(=O)OCc1cccc1)[C@H](C(=O)NC<br>Cc1cccc1)C2)NO                                                                                                                                                            | 580         |
| 662 | 813 | Nc1nc2ncc(CNc3ccc(C(=O)NO)cc3)nc2c(=O)[nH]1                                                                                                                                                                                   | 581         |
| 663 | 814 | O=C(NO)c1cccc(NC(=O)c2ccccc2)c1                                                                                                                                                                                               | 582         |
| 664 | 815 | O=C(NO)c1ccc2ccccc2n1                                                                                                                                                                                                         | 582.3       |
| 665 | 816 | Cc1cc(F)cc(C)c1Oc1ccc(C(C)(C)O)cc1-<br>c1cn(C)c(=O)e2[nH]c(C(=O)NCCCCC(=O)NO)cc12                                                                                                                                             | 583         |
| 666 | 818 | CCOc1ccc(C(C)=O)cc1NC(=O)c1cccc(C(=O)NO)c1                                                                                                                                                                                    | 590         |
| 667 | 819 | C#Cc1cccc(Nc2ncnc3ccc(S(=O)(=O)n4ccc(/C=C/C(=O)NO)c4<br>)cc23)c1                                                                                                                                                              | 590         |
| 668 | 820 | CCc1nc2cc(/C=C/C(=O)NO)ccc2c(=O)n1CCc1ccc(OC)cc1                                                                                                                                                                              | 594         |
| 669 | 821 | O=C(NO)c1ccc(CN2CCc3ccenc32)c(F)c1                                                                                                                                                                                            | 597         |
| 670 | 823 | CC(C)C[C@H](NC(=O)OC(C)(C)C(=O)N1CC2(C[C@H]1<br>C(=O)NCCCCC(=O)NO)SCCS2                                                                                                                                                       | 600         |
| 671 | 824 | CC(C)c1cc(C(C)C)c(C(C)C)cc1CS(=O)(=O)Nc1ccc(/C=C\C(=<br>O)NO)cc1                                                                                                                                                              | 600         |
| 672 | 825 | CC(CCCCC(=O)c1ccc2ccccc2c1)C(=O)NOCCCCC(=O)NO                                                                                                                                                                                 | 600         |
| 673 | 826 | O=C(/C=C/c1ccc(NS(=O)(=O)c2ccc(OC(F)(F)F)cc2)cc1)NO                                                                                                                                                                           | 600         |
| 674 | 828 | S=C1Sc2ccc(Cl)c2C2=NCCN12                                                                                                                                                                                                     | 600         |
| 675 | 829 | O=C(/C=C/c1ccc2c(=O)n(Cc3ccccc3)enc2c1)NO                                                                                                                                                                                     | 600         |
| 676 | 830 | CC(C)Cc1nc2cc(/C=C/C(=O)NO)ccc2n1CCc1cccc1                                                                                                                                                                                    | 601         |
| 677 | 831 | N[C@@H](CCCCC(=O)c1cccn1)c1cc(-c2ccccc2F)on1                                                                                                                                                                                  | 603         |
| 678 | 833 | CC[C@H]1OC(=O)[C@H](C)[C@@H](O[C@@H]2C[C@]<br>(C)(OC)[C@H](O)[C@@H](C)O2)[C@@H](C)[C@@H](O[C@<br>@@H]2O[C@H](C)C[C@H](N(C)Cc3ccc(-<br>c4cn(CCCCC(=O)NO)nn4)c3)[C@H]2O)[C@](C)(O)C[C@<br>@H](C)CN(C)[C@H](C)[C@@H](O)[C@]1(C)O | 604         |
| 679 | 834 | CC(C)C[C@H]1CC(=O)N[C@@H](CCCNC(=N)N)C(=O)N[C@<br>@@H](CCCCC(=O)O)C(=O)N[C@@H](Cc2ccccc2)C<br>C(=O)N1                                                                                                                         | 607         |
| 680 | 835 | O=C(CCCCCNC(=O)NC(=O)c1cccc1)NO                                                                                                                                                                                               | 608         |
| 681 | 836 | Cc1nc2ccc(/C=C/C(=O)NO)cc2c(=O)n1-c1cccc1                                                                                                                                                                                     | 609         |
| 682 | 838 | O=C(CCCSc1nc(-c2ccc(-c3ccccc3)cc2)cc(=O)[nH]1)NO                                                                                                                                                                              | 610         |
| 683 | 839 | O=C(Cc1ccc(CCCc2ccccc2C(F)(F)F)cc1)NO                                                                                                                                                                                         | 610         |
| 684 | 840 | O=C(/C=C/c1ccc(NC(=O)C(Cc2ccccc2)c2ccccc2)cn1)NO                                                                                                                                                                              | 610.6659394 |
| 685 | 841 | CCCN(Cc1ccc(C(=O)NO)cc1)C(=O)Nc1ccc(CN)cc1                                                                                                                                                                                    | 614         |
| 686 | 843 | CC[C@H]1OC(=O)[C@H](C)C(=O)[C@H](C)[C@@H](O[C@<br>@@H]2O[C@H](C)C[C@H](N(C)Cc3ccc(-<br>c4cn(CCCCCC(=O)NO)nn4)cc3)[C@H]2O)[C@](C)(OC)<br>C[C@@H](C)C2=NCCN3C(=O)O[C@@]1(C)[C@H]3[C@H]<br>2C                                    | 620         |
| 687 | 844 | O=C(CCCCCNCc1cc2ccccc2[nH]1)NO                                                                                                                                                                                                | 620         |

|     |      |                                                                                                                                                                                                                             |             |
|-----|------|-----------------------------------------------------------------------------------------------------------------------------------------------------------------------------------------------------------------------------|-------------|
| 688 | 845  | <chem>O=C1CCSc2ccc(C(=O)NO)cc2N1</chem>                                                                                                                                                                                     | 620         |
| 689 | 2050 | <chem>O=C(CCCCN1C(=O)c2ccc3c([N+](=O)[O-])ccc(e23)C1=O)NO</chem>                                                                                                                                                            | 620         |
| 690 | 846  | <chem>CC(C)(C)c1ccc(S(=O)(=O)NCc2ccc(C(=O)NO)cc2)cc1</chem>                                                                                                                                                                 | 622         |
| 691 | 848  | <chem>O=C(NO)c1cccc(C(=O)NOCc2ccc(Cl)cc2Cl)c1</chem>                                                                                                                                                                        | 630         |
| 692 | 849  | <chem>CCCCc1nc2cc(/C=C/C(=O)NO)ccc2n1CCN(CC)CC</chem>                                                                                                                                                                       | 630         |
| 693 | 850  | <chem>CC(C)(C)OC(=O)N(Cc1ccc(C(C)(C)C)cc1)c1ccc(C(=O)NO)cc1</chem>                                                                                                                                                          | 635         |
| 694 | 851  | <chem>O=C(NO)c1ccc(CNc2ccc3ncccc23)cc1</chem>                                                                                                                                                                               | 636         |
| 695 | 853  | <chem>O=C(NO)c1ccc(CN2c3ccccc3NC(=O)[C@H]2CCc2ccccc2)cc1</chem>                                                                                                                                                             | 640         |
| 696 | 854  | <chem>O=C(CCCCC1OCCCCCOc2ccccc2NC1=O)NO</chem>                                                                                                                                                                              | 643         |
| 697 | 855  | <chem>CC[C@H]1OC(=O)[C@@H](C)[C@H](O[C@H]2C[C@@](C)(OC)[C@@H](O)[C@H](C)O2)[C@H](C)[C@H](O[C@H]2O[C@@H](C)C[C@@H](N(C)Cc3ccc(-c4cn(CCCCC(=O)NO)nn4)cc3)[C@@H]2O)[C@@](C)(O)C[C@H](C)CN(C)[C@@H](C)[C@H](O)[C@@]1(C)O</chem> | 644         |
| 698 | 856  | <chem>COc1ccc(C(=O)c2ccc3c(ccn3Cc3ccc(C(=O)NO)cc3)c2)cc1</chem>                                                                                                                                                             | 646         |
| 699 | 858  | <chem>NC(=O)c1ccc2c(c1)CCCN2Cc1ccc(C(=O)NO)cc1</chem>                                                                                                                                                                       | 651         |
| 700 | 2051 | <chem>[N-]=[N+]=NCc1cc(N=[N+]=[N-])ccc(C(=O)Nc2ccc(-c3cc(C(=O)NCCCCC(=O)NO)no3)cc2)c1</chem>                                                                                                                                | 651         |
| 701 | 859  | <chem>CC(C)N(Cc1ccc(C(=O)NO)cc1)S(=O)(=O)c1c(F)c(F)c(F)c(F)c1F</chem>                                                                                                                                                       | 653         |
| 702 | 860  | <chem>O=C(NO)c1cccc(Cn2c(=O)n(CCc3ccccc3)c(=O)c3ccccc32)c1</chem>                                                                                                                                                           | 653         |
| 703 | 861  | <chem>COc1ccc(NC(=O)[C@H](Cc2ccc(OCC(=O)NO)cc2)NCCc2ccc2)cc1</chem>                                                                                                                                                         | 660         |
| 704 | 863  | <chem>COC(=O)Cc1c(C)n(Cc2ccc(-c3cn(CCCCC(=O)NO)nn3)cc2)e2ccc(OC)cc12</chem>                                                                                                                                                 | 672         |
| 705 | 864  | <chem>CC(C)c1cc(C(=O)N2Cc3ccc(/C=C/C(=O)NO)cc3C2)c(O)cc1O</chem>                                                                                                                                                            | 675         |
| 706 | 865  | <chem>O=C(NO)c1ccc2c(c1)CC(Nc1ccc(Br)cc1)CC2</chem>                                                                                                                                                                         | 680         |
| 707 | 866  | <chem>O=C(NO)c1ccc(NC(=O)c2cc(C(F)(F)F)cc(C(F)(F)F)c2)cc1</chem>                                                                                                                                                            | 682         |
| 708 | 868  | <chem>O=C(NO)c1ccc(C(=O)Nc2ccccc2)cc1</chem>                                                                                                                                                                                | 689         |
| 709 | 869  | <chem>O=CN(O)CCCCC(C(=O)Nc1nc2ccccc2c1)C(=O)Nc1nc2ccccc2c1</chem>                                                                                                                                                           | 690         |
| 710 | 870  | <chem>CN1c2ccc(F)cc2C(=O)N2CCc3c([nH]c4ccc(OCc5ccc(/C=C/C(=O)Nc6ccccc6N)cc5)cc34)C21</chem>                                                                                                                                 | 690         |
| 711 | 871  | <chem>O=C(NO)c1ccc(CN2c3ccccc3NC(=O)[C@H]2Cc2cccs2)cc1</chem>                                                                                                                                                               | 690         |
| 712 | 873  | <chem>O=C(CS)CCCCC(=O)Nc1ccccc1</chem>                                                                                                                                                                                      | 690         |
| 713 | 874  | <chem>O=C(COc1ccc2c(c1)CN(C(=O)CCc1ccccc1)[C@H](C(=O)NCc1ccccc1)C2)NO</chem>                                                                                                                                                | 692         |
| 714 | 875  | <chem>O=C(NO)c1ccc(CNC(=O)c2c(F)c(F)c(F)c2F)cc1</chem>                                                                                                                                                                      | 696.9935437 |
| 715 | 876  | <chem>Cc1ccc(-c2cc(C(=O)NCCCCC(=O)NO)nn2-c2ccc(S(N)(=O)=O)cc2)cc1</chem>                                                                                                                                                    | 697         |
| 716 | 878  | <chem>O=C(/C=C/c1ccc2ccccc12)NO</chem>                                                                                                                                                                                      | 700         |
| 717 | 879  | <chem>CC12CC3CC(C)(C1)CC(NC1cccc(NC(=O)CCCCC(=O)NO)c1)(C3)C2</chem>                                                                                                                                                         | 703         |
| 718 | 880  | <chem>COc1ccc2c(c1)c(CC(=O)NCCCCC(=O)NO)c(C)n2C(=O)c1ccc(Cl)cc1</chem>                                                                                                                                                      | 707         |
| 719 | 881  | <chem>CC12CC3CC(C)(C1)CC(NC(=O)CCCCC(=O)NO)(C3)C2</chem>                                                                                                                                                                    | 707         |
| 720 | 2052 | <chem>[N-]=[N+]=Nc1ccc(-c2cc(C(=O)NCCCCC(=O)NO)no2)cc1</chem>                                                                                                                                                               | 707         |
| 721 | 883  | <chem>CCCCC[C@H](CCCCC(=O)Nc1ccccc1)C(=O)NO</chem>                                                                                                                                                                          | 710         |
| 722 | 884  | <chem>O=C(CCCCCc1nc(-c2ccccc2Cl)no1)C(F)(F)F</chem>                                                                                                                                                                         | 710         |
| 723 | 885  | <chem>COc1ccccc2c1C(=O)c1c(O)c3c(c(O)c1C2=O)C[C@@](O)(C(C)=O)C[C@@H]3O[C@H]1C[C@H](NCc2ccc(-c3cn(CCCCC(=O)NO)nn3)cc2)[C@H](O)[C@H](C)O1</chem>                                                                              | 710         |
| 724 | 886  | <chem>CC[C@@H]1OC(=O)[C@@H](C)[C@H](O[C@H]2C[C@@](C)(OC)[C@@H](O)[C@H](C)O2)[C@H](C)[C@H](O[C@@H]2O)[C@H](C)C[C@H](N(C)Cc3ccc(-c4cn(CCCCC(=O)NO)nn4)cc3)[C@H]2O)[C@@](C)(OC)</chem>                                         | 713         |

|     |     |                                                                                                                                                                                                                                        |             |
|-----|-----|----------------------------------------------------------------------------------------------------------------------------------------------------------------------------------------------------------------------------------------|-------------|
|     |     | <chem>C[C@H](C)C(=O)[C@@H](C)[C@@H](O)[C@@]1(C)O</chem>                                                                                                                                                                                |             |
| 725 | 888 | <chem>CC(C)[C@H](NC(=O)OC(C)(C)C)C(=O)N1CC2(C[C@H]1C(=O)NCCCCC(=O)NO)SCCS2</chem>                                                                                                                                                      | 720         |
| 726 | 889 | <chem>O=C(/C=C/c1ccc2c(c1)nc(Cc1cccc1)n2CCCN1CCCC1=O)NO</chem>                                                                                                                                                                         | 724         |
| 727 | 890 | <chem>O=C(/C=C/c1ccc(C(c2c[nH]c3cccc23)c2c[nH]c3cccc23)cc1)NO</chem>                                                                                                                                                                   | 730         |
| 728 | 891 | <chem>O=C(NO)c1ccc(CN2c3cccc3NC(=O)[C@H]2Cc2ccc(O)cc2)cc1</chem>                                                                                                                                                                       | 730         |
| 729 | 893 | <chem>COc1ccc2c(=O)n(Cc3cccc3)c(=O)n(Cc3ccc(C(=O)NO)cc3)cc2c1</chem>                                                                                                                                                                   | 731         |
| 730 | 894 | <chem>Nc1ccc(F)cc1NC(=O)c1ccc(CNC(=O)/C=C/c2ccnc2)cc1</chem>                                                                                                                                                                           | 733         |
| 731 | 895 | <chem>Nc1ncnc2c1c(-c1nc3[nH]ccc3c1)nn2CCCCCCCC(=O)NO</chem>                                                                                                                                                                            | 733         |
| 732 | 896 | <chem>O=C(CCCCCC(=O)Nc1ccc(-c2cnnc2CC(O)c2cccc(Br)c2)cc1)NO</chem>                                                                                                                                                                     | 737         |
| 733 | 898 | <chem>O=C(NO)c1ccc(CN2C(=O)CCc3cc(Br)ccc32)cc1</chem>                                                                                                                                                                                  | 743         |
| 734 | 899 | <chem>CCCN1CC(=O)N2Cc3c(c4cccc4n3Cc3ccc(C(=O)NO)cc3)CC2C1=O</chem>                                                                                                                                                                     | 747         |
| 735 | 900 | <chem>CC[C@H]1OC(=O)[C@@H](C)[C@H](O[C@H]2C[C@@](C)(OC)[C@](O)(CN(C)C)[C@H](C)O2)[C@H](C)[C@H](O[C@H]2O[C@@H](C)C[C@@H](N(C)Cc3ccc(-c4cn(CCCCCC(=O)NO)nn4)cc3)[C@@H]2O)[C@@](C)(O)[C@H](C)CN(C)[C@@H](C)[C@H](O)[C@@]1(C)O</chem>      | 749         |
| 736 | 901 | <chem>CCC(=O)CCCC[C@@H]1NC(=O)[C@H](CCCNC(=N)N)NC(=O)CCN(CC(C)C)C(=O)CN(CCc2c[nH]c3cccc23)C1=O</chem>                                                                                                                                  | 750         |
| 737 | 903 | <chem>COc1cc2ccn(CCCCOc3cccc(NC(=O)CCCCC(=O)NO)c3)c2c(OC)c1OC</chem>                                                                                                                                                                   | 752         |
| 738 | 904 | <chem>COc1ccc(C(=O)c2ccc3c(ccn3Cc3ccc(C(=O)NO)cc3)c2)cc1OC</chem>                                                                                                                                                                      | 756         |
| 739 | 905 | <chem>O=C(/C=C/c1cccc1)NO</chem>                                                                                                                                                                                                       | 759         |
| 740 | 906 | <chem>O=C(COc1ccc2c(c1)CN(C(=O)CCc1cccc1)[C@H](C(=O)Nc1cccc1)C2)NO</chem>                                                                                                                                                              | 759         |
| 741 | 908 | <chem>O=C(NO)c1ccc(NC2CCN(Cc3cccc3)C2=O)cc1</chem>                                                                                                                                                                                     | 760         |
| 742 | 909 | <chem>CC(C)(C)OC(=O)N1CCCC[C@H]1C(=O)N1CC2(C[C@H]1C(=O)NCCCCC(=O)NO)SCCS2</chem>                                                                                                                                                       | 760         |
| 743 | 910 | <chem>CCCCCCCCc1nc2cc(/C=C/C(=O)NO)ccc2n1CCCO</chem>                                                                                                                                                                                   | 763.4788799 |
| 744 | 911 | <chem>CCc1nc2cc(F)c(/C=C/C(=O)NO)cc2c(=O)n1CCc1cccc1</chem>                                                                                                                                                                            | 766         |
| 745 | 913 | <chem>O=C(NO)c1ccc(Cl)c(NC(=O)c2ccc(-c3cccc3)cc2Cl)c1</chem>                                                                                                                                                                           | 780         |
| 746 | 914 | <chem>CCc1nc(N)nc(N)c1-c1ccc(-c2cn(CCCCCC(=O)NO)nn2)cc1</chem>                                                                                                                                                                         | 780         |
| 747 | 915 | <chem>CC[C@H](C)[C@@H]1NC(=O)[C@@H](Cc2ccc(OC)cc2)NC(=O)[C@H](CCCCC(=O)C(F)(F)C(F)(F)F)NC(=O)[C@H]2CCCN2C1=O</chem>                                                                                                                    | 780         |
| 748 | 916 | <chem>O=CN(O)CCCCCCCC(=O)Nc1ccc2cccc2c1</chem>                                                                                                                                                                                         | 780         |
| 749 | 918 | <chem>COc1cc2c(cc1-c1c(C)noc1C)[nH]c1ncnc(NCCCCC(=O)NO)c12</chem>                                                                                                                                                                      | 784         |
| 750 | 919 | <chem>CC[C@@H]1OC(=O)[C@H](C)[C@@H](O[C@@H]2C[C@](C)(OC)[C@@](O)(CN(C)Cc3ccc(-c4cn(CCCCCC(=O)NO)nn4)cc3)[C@@H](C)O2)[C@@H](C)[C@@H](O[C@@H]2O[C@H](C)C[C@@H](N(C)C)[C@H]2O)[C@](C)(O)C[C@@H](C)CN(C)[C@H](C)[C@@H](O)[C@@]1(C)O</chem> | 786         |
| 751 | 920 | <chem>CCOC(=O)Nc1cccc(-c2csc(NC(=O)CCCCC(=O)NO)n2)c1</chem>                                                                                                                                                                            | 787         |
| 752 | 921 | <chem>COc1cc(-c2nc3cc(/C=C/C(=O)NO)ccc3n2CCCO)ccc1OCc1cccc1</chem>                                                                                                                                                                     | 790         |
| 753 | 923 | <chem>CC(C)(C)OC(=O)NCCC[C@@H]1NC(=O)[C@]2(C)CSC(=N2)c2csc(n2)CNC(=O)C[C@@H](/C=C/CCS)OC1=O</chem>                                                                                                                                     | 790         |
| 754 | 924 | <chem>CC(/C=C/C(=O)NO)=C[C@H](C)C(=O)c1ccc(N(C)C)cc1</chem>                                                                                                                                                                            | 790         |
| 755 | 925 | <chem>O=C(NO)c1ccc(CN2CCCc3cc(-c4cc[nH]n4)ccc32)cc1</chem>                                                                                                                                                                             | 792         |
| 756 | 926 | <chem>O=C(NO)c1ccc(Cn2c3c(c4cccc42)COCC3)cc1</chem>                                                                                                                                                                                    | 794.33      |
| 757 | 928 | <chem>CC[C@H]1OC(=O)[C@H](C)C(=O)[C@H](C)[C@@H](O)[C</chem>                                                                                                                                                                            | 796.2       |

|     |      |                                                                                                                                                                                                                                    |             |
|-----|------|------------------------------------------------------------------------------------------------------------------------------------------------------------------------------------------------------------------------------------|-------------|
|     |      | <chem>@@H]2O[C@H](C)C[C@H](N(C)Cc3ccc(-c4cn(CCCCCC(=O)NO)nn4)cc3)[C@H]2O[C@](C)(OC)C[C@@H](C)C2=NCCN3C(=O)O[C@@]1(C)[C@H]3[C@H]2C</chem>                                                                                           |             |
| 758 | 929  | <chem>O=C(CCCCCC(=O)Nc1ccc(-c2cn(Cc3ccc(F)cc3)nn2)cc1)NO</chem>                                                                                                                                                                    | 797         |
| 759 | 930  | <chem>COc1cc(C(=O)c2csc(-c3ccc(NC(=O)/C=C/C(=O)Nc4ccccc4N)cc3)n2)cc(OC)c1OC</chem>                                                                                                                                                 | 800         |
| 760 | 931  | <chem>Cc1ccc(-c2ccnc(NC3CCc4ccc(C(=O)NO)cc4C3)n2)cc1</chem>                                                                                                                                                                        | 800         |
| 761 | 933  | <chem>O=CN(O)CCCCC(C(=O)Nc1ccc2ncccc2c1)C(=O)Nc1ccc2ncccc2c1</chem>                                                                                                                                                                | 800         |
| 762 | 934  | <chem>CN(C)c1cccc(-c2ccnc(NC3CCc4ccc(C(=O)NO)cc4C3)n2)c1</chem>                                                                                                                                                                    | 800         |
| 763 | 935  | <chem>Nc1cc(F)ccc1NC(=O)c1ccc(CNC(=O)/C=C/c2ccnc2)cc1</chem>                                                                                                                                                                       | 801.6280283 |
| 764 | 936  | <chem>CCC(=O)CCCC[C@@H]1NC(=O)[C@H]2CC23CCN(CCCOCCn2ccc4cc(c4c2=O)-c2nc1[nH]2)CC3</chem>                                                                                                                                           | 808         |
| 765 | 938  | <chem>O=C(NO)c1ccc(Cn2cnc(-c3ccccc3F)n2)c(F)c1</chem>                                                                                                                                                                              | 813         |
| 766 | 939  | <chem>CC[C@H]1OC(=O)[C@@H](C)[C@H](O[C@H]2C[C@@](C)(OC)[C@](O)(CN(C)Cc3ccc(-c4cn(CCCCCC(=O)NO)nn4)cc3)[C@H](C)O2)[C@H](C)[C@H](O[C@H]2O[C@@H](C)C[C@@H](N(C)C)[C@@H]2O)[C@@](C)(O)C[C@H](C)CN(C)[C@@H](C)[C@H](O)[C@@]1(C)O</chem> | 817         |
| 767 | 940  | <chem>CN1CCc2c(c3ccccc3n2Cc2ccc(C(=O)NO)cc2)C1</chem>                                                                                                                                                                              | 817.2153476 |
| 768 | 941  | <chem>CC(C)C[C@H](NC(=O)CNC(=O)c1cccc(/C=C/C(=O)NO)c1)B1O[C@@H]2[C@@H]3C[C@H](C[C@]2(C)O1)C3(C)C</chem>                                                                                                                            | 819         |
| 769 | 943  | <chem>CC[C@H]1OC(=O)[C@H](C)C(=O)[C@H](C)[C@@H](O[C@@H]2O[C@H](C)C[C@H](N(C)Cc3ccc(-c4cn(CCCCCC(=O)NO)nn4)cc3)[C@H]2O)[C@](C)(O)C[C@@H](C)C2=NCCN3C(=O)O[C@@]1(C)[C@H]3[C@H]2C</chem>                                              | 825         |
| 770 | 944  | <chem>O=C(NO)c1cccc(NC2CCCC2)c1</chem>                                                                                                                                                                                             | 830         |
| 771 | 945  | <chem>O=C(NO)[C@@H]1[C@H](c2ccccc2)[C@H]1c1cc(Cl)c2c(c1)OCCO2</chem>                                                                                                                                                               | 830         |
| 772 | 946  | <chem>O=C(NO)c1ccc2c(c1)CC(Nc1nccc(-c3ccnc3)n1)CO2</chem>                                                                                                                                                                          | 830         |
| 773 | 2053 | <chem>O=C(CCCCCc1nc(-c2cccc([N+](=O)[O-])c2)no1)C(F)(F)F</chem>                                                                                                                                                                    | 830         |
| 774 | 948  | <chem>CC12CC3CC(C)(C1)CC(NC(=O)CCCCC(=O)NO)(C3)C2</chem>                                                                                                                                                                           | 831         |
| 775 | 949  | <chem>Cc1ccc(C(=O)NOCCCCC(=O)NO)cc1C</chem>                                                                                                                                                                                        | 833         |
| 776 | 950  | <chem>COc1ccc2c(c1)c(CCNC(C)=O)cn2Cc1ccc(C(=O)NO)cc1</chem>                                                                                                                                                                        | 834.8741702 |
| 777 | 951  | <chem>CCN(CC)Cc1ccc2cc(COC(=O)Nc3ccc(C(=O)NO)cc3)ccc2c1</chem>                                                                                                                                                                     | 837         |
| 778 | 953  | <chem>O=C(/C=C/c1ccc(NC(=O)Nc2ccc(Cl)cc2)cc1)NO</chem>                                                                                                                                                                             | 840         |
| 779 | 954  | <chem>COc1ccc(C(=O)NO)cc1OCc1ccc(Cl)cc1Cl</chem>                                                                                                                                                                                   | 840         |
| 780 | 955  | <chem>COc1cc2c(cc1OC)C(=O)C(CC1CCN(Cc3ccc(NC(=O)CCCCC(=O)NO)cc3)CC1)C2</chem>                                                                                                                                                      | 842         |
| 781 | 956  | <chem>O=C(NO)c1ccc(Cn2c(=O)n(Cc3ccc(O)cc3)c(=O)c3ccccc32)c1</chem>                                                                                                                                                                 | 845         |
| 782 | 958  | <chem>O=C(NO)c1ccc2c(c1)CC(NS(=O)(=O)c1ccc(Cl)cc1)CC2</chem>                                                                                                                                                                       | 850         |
| 783 | 959  | <chem>COc1ccc(-c2noc(CNCc3ccc(C(=O)NO)cc3)n2)cc1</chem>                                                                                                                                                                            | 860         |
| 784 | 960  | <chem>COc1ccc(C(=O)NO)cc1NCc1ccc2c1oc1ccccc12</chem>                                                                                                                                                                               | 860         |
| 785 | 961  | <chem>O=C(NO)c1ccc(CN(Cc2ccc(F)cc2)S(=O)(=O)c2cc(F)c(F)c(F)c2F)cc1</chem>                                                                                                                                                          | 860         |
| 786 | 963  | <chem>O=C(CCCCCCCC(=O)NCCCN1c2ccccc2CCc2ccc(Cl)cc21)NO</chem>                                                                                                                                                                      | 864         |
| 787 | 964  | <chem>CC(C)C[C@H]1CC(=O)NC(C)(C)C(=O)N[C@@H](CCCCC(=O)O)C(=O)N[C@@H](Cc2ccccc23)C(=O)N1</chem>                                                                                                                                     | 870         |
| 788 | 965  | <chem>O=C(NO)[C@@H]1[C@H](c2ccccc2)[C@H]1c1ccc2ncnc2c1</chem>                                                                                                                                                                      | 870         |
| 789 | 966  | <chem>CC(C)(C)OC(=O)N[C@@H](CO)C(=O)N1CC2(C[C@H]1C(=O)NCCCCC(=O)NO)SCCS2</chem>                                                                                                                                                    | 870         |
| 790 | 968  | <chem>COc1cc(-c2nc(NCc3ccc(C(=O)NO)cc3)cc3c2[nH]c2ccccc23)cc(OC)c1OC</chem>                                                                                                                                                        | 875         |
| 791 | 969  | <chem>CC(C)N(Cc1ccc(C(=O)NO)cc1)C(=O)c1c(F)c(F)c(F)c1F</chem>                                                                                                                                                                      | 876         |

|     |      |                                                                                                                                                                                                                          |      |
|-----|------|--------------------------------------------------------------------------------------------------------------------------------------------------------------------------------------------------------------------------|------|
| 792 | 970  | CC[C@@H]1OC(=O)[C@@H](C)[C@H](O[C@H]2C[C@@](C)(OC)[C@@H](O)[C@H](C)O2)[C@H](C)[C@H](O[C@@H]2O[C@H](C)C[C@H](N(C)Cc3ccc(-c4cn(CCCCC(=O)NO)nn4)cc3)[C@H]2O)[C@@](C)(OC)C[C@@H](C)C(=O)[C@@H](C)[C@@H](O)[C@@]1(C)O         | 877  |
| 793 | 971  | CC(C)C(C(=O)Nc1ccc(C(=O)NO)nc1)c1cccc1                                                                                                                                                                                   | 882  |
| 794 | 973  | Cn1cccc1C(=O)N1CCc2cc(C(=O)NO)ccc2C1                                                                                                                                                                                     | 890  |
| 795 | 974  | CCc1nc2cc(/C=C/C(=O)NO)ccc2c(=O)n1CCc1ccc(F)cc1                                                                                                                                                                          | 891  |
| 796 | 975  | O=C(NO)c1ccc2c(c1)CC(Nc1cccc(-c3ccc(Cl)nc3)n1)CC2                                                                                                                                                                        | 900  |
| 797 | 976  | O=C(NO)c1ccc(Cn2c3c(c4cc(F)ccc42)CS(=O)(=O)CC3)cc1                                                                                                                                                                       | 900  |
| 798 | 978  | O=C(CCCCCS)NCc1cccc(OCc2ccccc2)c1                                                                                                                                                                                        | 904  |
| 799 | 979  | Cc1cc2cc(NS(=O)(=O)c3ccc(C(=O)NO)cc3)ccc2n(C)c1=O                                                                                                                                                                        | 908  |
| 800 | 980  | O=C(NO)c1cccc(S(=O)(=O)N[C@H](C(=O)Nc2ccccc2)c2cccc2)c1                                                                                                                                                                  | 910  |
| 801 | 981  | CCCCS(=O)(=O)NC1CCc2ccc(C(=O)NO)cc2C1                                                                                                                                                                                    | 910  |
| 802 | 983  | Cc1cn(Cc2ccc(C(=O)NO)cc2)c2ccccc12                                                                                                                                                                                       | 911  |
| 803 | 984  | Oc1cccn(CCCCn2cc(-c3ccccc3)nn2)c1=S                                                                                                                                                                                      | 917  |
| 804 | 985  | C[C@@]12Nc3ccccc3[C@]1(O)CCN2Cc1ccc(/C=C/C(=O)NO)cc1                                                                                                                                                                     | 920  |
| 805 | 986  | Cn1cc(CN2CCC(/C=C/C(=O)NO)CC2)c2ccccc21                                                                                                                                                                                  | 920  |
| 806 | 988  | O=C(NO)c1ccc(NC(=O)c2ccc(N3CCOCC3)cc2)cc1                                                                                                                                                                                | 921  |
| 807 | 989  | COc1ccc(NC(=O)[C@H](Cc2ccc(OCC(=O)NO)cc2)NCCCc2ccccc2)cc1                                                                                                                                                                | 922  |
| 808 | 990  | O=C(NO)c1cc2c(cc1F)CCC(NS(=O)(=O)c1cccc(Cl)c1)C2                                                                                                                                                                         | 930  |
| 809 | 2054 | O=C(NO)c1ccc2c(c1)CC(Nc1ccc([N+](=O)[O-])cn1)CC2                                                                                                                                                                         | 930  |
| 810 | 991  | Nc1cccc(-c2cc(C(=O)NCCCCC(=O)NO)no2)c1                                                                                                                                                                                   | 938  |
| 811 | 993  | O=C(CCCCCC(=O)Nc1cccc(-c2cnmn2-c2ccccc2)c1)NO                                                                                                                                                                            | 942  |
| 812 | 994  | CCCCNc1nc(Cl)nc2c1nnc2Cc1ccc(C(=O)Nc2ccccc2N)cc1                                                                                                                                                                         | 948  |
| 813 | 995  | O=C(CCCCCc1nc(-c2cccs2)no1)C(F)(F)F                                                                                                                                                                                      | 950  |
| 814 | 996  | O=C(/C=C/C1CCN(Cc2ccc(Cl)cc2)CC1)NO                                                                                                                                                                                      | 950  |
| 815 | 998  | O=C(/C=C/c1ccc(C(F)(F)F)cc1)NO                                                                                                                                                                                           | 954  |
| 816 | 999  | COc1ccc(C(=O)NO)cc1NCc1ccc(OCCCC(=O)Nc2ccc3c(c2)c(c(C)c(=O)n3C)cc1                                                                                                                                                       | 956  |
| 817 | 1000 | CC(C)(C)OC(=O)NCCCC(=O)N1CC2(C[C@H]1C(=O)NCCC(CCC(=O)NO)SCCS2                                                                                                                                                            | 960  |
| 818 | 1001 | CCC(C(=O)Nc1ccc(C(=O)NO)nc1)c1cccc1                                                                                                                                                                                      | 964  |
| 819 | 1003 | O=C(CCCCCN(=O)c1ccc(NC(=O)NC(C(=O)Nc2ccc(C(F)(F)F)c2)c2ccccc2)cc1)NO                                                                                                                                                     | 967  |
| 820 | 1004 | CC1Sc2ccc(C(=O)NO)cc2NC1=O                                                                                                                                                                                               | 970  |
| 821 | 1005 | O=C(NO)c1ccc2c(c1)CC(NS(=O)(=O)c1cccc(Cl)c1)CN2                                                                                                                                                                          | 970  |
| 822 | 1006 | O=C(NO)c1ccc(CN(C(=O)c2c(F)c(F)c(F)c(F)c2F)C2CC2)cc1                                                                                                                                                                     | 971  |
| 823 | 1008 | C[C@@H](NC(=O)c1cccc(=S)n1O)C(=O)O                                                                                                                                                                                       | 980  |
| 824 | 1009 | O=C(NO)c1ccc(-c2ccc3nenc(Nc4ccc(OCc5ccc(F)c5)c(Cl)c4)c3c2)s1                                                                                                                                                             | 980  |
| 825 | 1010 | O=C(NO)c1ccc(Cn2nnnc2-c2cccs2)cc1                                                                                                                                                                                        | 984  |
| 826 | 1011 | CC[C@H]1OC(=O)[C@H](C)[C@@H](O[C@@H]2C[C@@](C)(OC)[C@@](O)(CN(C)Cc3ccc(-c4cn(CCCCC(=O)NO)nn4)cc3)[C@@H](C)O2)[C@@H](C)[C@@H](O[C@H]2O[C@H](C)C[C@H](N(C)C)[C@@H]2O)[C@@](C)(OC)C[C@@H](C)C(=O)[C@H](C)[C@H](O)[C@@]1(C)O | 985  |
| 827 | 1013 | Cc1ccc(-c2cc(C(F)(F)F)nn2-c2ccc(S(=O)(=O)NCCCCC(=O)NO)cc2)cc1                                                                                                                                                            | 989  |
| 828 | 1014 | O=C(/C=C/C1cccn1)NC1CCc2ccc(C(=O)NO)cc2C1                                                                                                                                                                                | 990  |
| 829 | 1015 | O=C(NO)c1ccc(CN2C(=O)CN(Cc3ccc(Cl)cc3)C2=O)cc1                                                                                                                                                                           | 994  |
| 830 | 1016 | O=C(NO)c1cc(F)c(Cn2nnnc2-c2cccs2)c(F)c1                                                                                                                                                                                  | 996  |
| 831 | 1017 | C#Cc1ccc(C(=O)NO)s1                                                                                                                                                                                                      | 1000 |
| 832 | 1018 | O=C(NO)c1ccc(CCCc2ccccc2)cc1                                                                                                                                                                                             | 1000 |

|     |      |                                                                                                                                                                          |             |
|-----|------|--------------------------------------------------------------------------------------------------------------------------------------------------------------------------|-------------|
| 833 | 1020 | CC(=O)NCCCC[C@@H]1NC(=O)C[C@H](CC(C)C)NC(=O)[C@H](Cc2cccc3ccccc23)NC(=O)[C@H](CCCCC(=O)O)NC1=O                                                                           | 1000        |
| 834 | 1021 | COc1ccc(-c2cenc(NC3CCc4ccc(C(=O)NO)cc4C3)n2)cn1                                                                                                                          | 1000        |
| 835 | 1022 | Cc1ccc2c(c1)SC(=S)N1CCCN=C21                                                                                                                                             | 1000        |
| 836 | 1023 | S=C1Sc2ccc(I)cc2C2=NCCCN12                                                                                                                                               | 1000        |
| 837 | 1025 | O=C(NO)c1cn(C2CCN(C(=O)Cc3ccc4ccccc4c3)CC2)nn1                                                                                                                           | 1000        |
| 838 | 1026 | COc1ccc(NC(=O)[C@@H]2Cc3ccc(OCC(=O)NO)cc3CN2C(=O)OC(C)(C)C)cc1                                                                                                           | 1000        |
| 839 | 1027 | S=C1Sc2cc(Br)ccc2C2=NCCN12                                                                                                                                               | 1000        |
| 840 | 1028 | O=C(CCCc1ccc(NS(=O)(=O)c2ccccc2)cc1)NO                                                                                                                                   | 1000        |
| 841 | 1030 | Cc1nc2c(c(N(C)c3ccc(OCCCCC(=O)NO)cc3)n1)CCC2                                                                                                                             | 1003        |
| 842 | 1031 | O=C(/C=C/c1ccc2c(c1)nc(Cc1ccccc1)n2CCc1ccccc1)NO                                                                                                                         | 1005        |
| 843 | 1032 | O=C(/C=C/c1ccc(NC(=O)Cc2ccc3ccccc3c2)cn1)NO                                                                                                                              | 1010        |
| 844 | 1033 | Nc1ccccc1NC(=O)c1ccc(NC(=O)c2n[nH]cc2NC(=O)c2c(Cl)ccc2Cl)cc1                                                                                                             | 1010.16     |
| 845 | 1035 | CC[C@H]1OC(=O)[C@H](C)[C@@H](O)[C@H](C)[C@@H](O)[C@@H]2O[C@H](C)C[C@H](N(C)Cc3ccc(-c4cn(CCCCCC(=O)NO)nn4)cc3)[C@H]2O)[C@](C)(O)C[C@@H](C)CN(C)[C@H](C)[C@@H](O)[C@]1(C)O | 1020        |
| 846 | 1036 | O=C(NO)c1ccc(Cl)c(OCc2ccc(Cl)cc2)c1                                                                                                                                      | 1020        |
| 847 | 1037 | COc1ccc(NC(=O)[C@@H]2Cc3ccc(OCC(=O)NO)cc3CN2CCc2ccccc2)cc1                                                                                                               | 1020        |
| 848 | 1038 | O=C(CCCc1ccn(Cc2ccc(Nc3ccccc3)cc2)n1)NO                                                                                                                                  | 1024        |
| 849 | 1040 | CC12CC3CC(C)(C1)CC(NCc1ccc(/C=C/C(=O)NO)cc1)(C3)C2                                                                                                                       | 1030        |
| 850 | 1041 | O=C(NO)c1ccc(C(=O)NCc2ccccc2)cc1                                                                                                                                         | 1030        |
| 851 | 1042 | CC(C)(C)c1cccc(NC(=O)c2ccc(C(=O)NO)cc2)c1                                                                                                                                | 1040        |
| 852 | 1043 | Cc1cccc(C(=O)NOCCCCC(=O)NO)c1                                                                                                                                            | 1043        |
| 853 | 1045 | CC[C@@]1(O)C(=O)OCc2c1cc1n(c2=O)Cc2cc3cc(OCc4cn(CCCCCC(=O)NO)nn4)ccc3nc2-1                                                                                               | 1046        |
| 854 | 1046 | O=C(NO)c1ccc(Cn2c(=O)n(Cc3ccc(F)cc3)c(=O)c3ccccc32)c1                                                                                                                    | 1049        |
| 855 | 1047 | CN(C)c1ccc(CNC(=O)NCCC(=O)NO)cc1                                                                                                                                         | 1050        |
| 856 | 1048 | CN(c1ccc(OCCCCC(=O)NO)cc1)c1nenc2ccccc12                                                                                                                                 | 1058        |
| 857 | 1050 | O=C(NO)c1ccc(Cn2ccc3cc(C(=O)c4ccc(Cl)cc4)ccc32)cc1                                                                                                                       | 1060        |
| 858 | 1051 | Nc1nc2ncc(CNc3ccc(C(=O)NCCCCC(=O)NO)cc3)nc2c(=O)[nH]1                                                                                                                    | 1060        |
| 859 | 1052 | NC(=O)c1ccc2c(c1)CCCN2Cc1ccc(C(=O)NO)cc1                                                                                                                                 | 1060        |
| 860 | 1053 | CCCN(Cc1ccc(C(=O)NO)cc1)C(=O)Nc1ccccc1                                                                                                                                   | 1064.697592 |
| 861 | 1055 | O=C(CCCCCC(=O)NCCCN1c2ccccc2CCc2ccc(Cl)cc21)NO                                                                                                                           | 1070        |
| 862 | 1056 | CC12CC3CC(C)(C1)CC(NC(=O)CCCCCCC(=O)NO)(C3)C2                                                                                                                            | 1070        |
| 863 | 1057 | O=C(CCCCCS)Nc1ccccc1                                                                                                                                                     | 1070        |
| 864 | 1058 | CC(C)CCc1c(OCCCCC(=O)NO)ccc2c1OC(=O)CC2                                                                                                                                  | 1075.12     |
| 865 | 1060 | Nc1cc(F)ccc1NC(=O)c1ccc(CNC(=O)/C=C2\NC(=O)c3ccccc32)cc1                                                                                                                 | 1080        |
| 866 | 1061 | O=C(NO)c1ccc(Cl)c(NC(=O)c2ccc(Oc3ccccc3)cc2)c1                                                                                                                           | 1080        |
| 867 | 1062 | O=C(NO)c1ccc(CNC(=O)c2ccc(-c3sc(N4N=C(c5ccccc5)/C(=N/Nc5ncc5)C4=O)n3)cc2)cc1                                                                                             | 1086.8      |
| 868 | 1063 | COc1ccc(/C=C/c2cc(OC)c(OC)c(OC)c2)cc1/C=C/C(=O)Nc1ccccc1N                                                                                                                | 1090        |
| 869 | 1065 | O=C(/C=C/c1ccc2c(c1)nc(Cc1ccccc1)n2CCCN1CCOCC1)NO                                                                                                                        | 1090        |
| 870 | 1066 | O=C(NO)c1ccc(NC(=O)C(Cc2ccccc2)c2ccccc2)cn1                                                                                                                              | 1090        |
| 871 | 1067 | O=C(NO)C1=CCCC1                                                                                                                                                          | 1090        |
| 872 | 1068 | O=C(Cc1ccccc1)Nc1ccc(C(=O)NO)nc1                                                                                                                                         | 1090        |
| 873 | 1070 | O=C(CCCCC1OCCCCCOc2ccccc2NC1=O)NO                                                                                                                                        | 1100        |

|     |      |                                                                                                                                                                                                                       |             |
|-----|------|-----------------------------------------------------------------------------------------------------------------------------------------------------------------------------------------------------------------------|-------------|
| 874 | 1071 | CN(C)S(=O)(=O)c1ccc(NCCCCC(=O)NO)c2nonc12                                                                                                                                                                             | 1100        |
| 875 | 1072 | COc1ccc(C(=O)NO)cc1NC(=O)c1ccc(-c2cccc2)cc1Cl                                                                                                                                                                         | 1100        |
| 876 | 1073 | O=C(NO)c1ccc(CN2c3ccccc3CCC[C@@H]3CCCC[C@H]32)cc1                                                                                                                                                                     | 1100        |
| 877 | 1075 | O=C(NO)c1ccc(CN2c3ccccc3S(=O)(=O)C[C@@H]3CCCC[C@@H]32)cc1                                                                                                                                                             | 1100        |
| 878 | 1076 | Cc1ccc(-c2ccnc(NC3CCc4ccc(C(=O)NO)cc4C3)n2)c(F)c1                                                                                                                                                                     | 1100        |
| 879 | 1077 | O=C(CCCCC/C=C/c1csc(Br)n1)NO                                                                                                                                                                                          | 1100        |
| 880 | 1078 | C[C@@]12CSC(=N1)c1csc(n1)CNC(=O)C[C@@H]1(/C=C/CCS)OC(=O)[C@H](CCCCNC(=O)O[C@@H]1CC/C=CCC1)NC2=O                                                                                                                       | 1115        |
| 881 | 1080 | COc1cccc(C(=O)c2ccc3c(ccn3Cc3ccc(C(=O)NO)cc3)c2)c1                                                                                                                                                                    | 1120        |
| 882 | 1081 | O=C(CCCCCCS)Nc1cccc1                                                                                                                                                                                                  | 1120        |
| 883 | 1082 | O=C(NO)c1ccc2c(c1)CC(NS(=O)(=O)c1cccc(F)c1)CN2                                                                                                                                                                        | 1140        |
| 884 | 1083 | COc1ccc(CCN2c(=O)c3ccccc3n(Cc3ccc(C(=O)NO)cc3)c2=O)c1                                                                                                                                                                 | 1150        |
| 885 | 1085 | O=C(NO)c1ccc(C(=O)NCCc2cccc2)cc1                                                                                                                                                                                      | 1150        |
| 886 | 1086 | C[C@H](NC(=O)OC(C)(C)C)C(=O)N1CC2(C[C@H]1C(=O)NCCCCC(=O)NO)SCCS2                                                                                                                                                      | 1150        |
| 887 | 1087 | O=C(NO)c1ccc(Cn2c(=O)n(CCc3ccccc3)c(=O)c3cc(F)ccc32)c1                                                                                                                                                                | 1155        |
| 888 | 1088 | CC(C)(C)OC(=O)N1Cc2cc(OCC(=O)NO)ccc2C[C@H]1C(=O)Nc1cccc(Cl)c1                                                                                                                                                         | 1170        |
| 889 | 1090 | O=C(NO)c1ccc(CN2C(=O)CCCc3cc(Cl)ccc32)cc1                                                                                                                                                                             | 1170        |
| 890 | 1091 | COc1ccc(NC(=O)[C@H](Cc2ccc(OCC(=O)NO)cc2)NCc2cccc2)cc1                                                                                                                                                                | 1180        |
| 891 | 1092 | CC[C@@H]1OC(=O)[C@H](C)[C@@H](O[C@@H]2C[C@](C)(OC)[C@@](O)(CN(C)Cc3ccc(-c4cn(CCCC(=O)NO)nn4)cc3)[C@@H](C)O2)[C@@H](C)[C@@H](O[C@@H]2O[C@H](C)C[C@H](N(C)C)[C@H]2O)[C@](C)(O)C[C@@H](C)CN(C)[C@H](C)[C@@H](O)[C@]1(C)O | 1180        |
| 892 | 1093 | CC[C@H]1OC(=O)[C@H](C)[C@@H](O[C@@H]2C[C@](C)(OC)[C@H](O)[C@@H](C)O2)[C@@H](C)[C@@H](O[C@@H]2O[C@H](C)C[C@H](N(C)Cc3ccc(-c4cn(CCCCC(=O)NO)nn4)cc3)[C@@H]2O)[C@](C)(OC)C[C@@H](C)C(=O)[C@H](C)[C@H](O)[C@]1(C)O        | 1180        |
| 893 | 1095 | Cc1nc(N(C)c2ccc(OCC(=O)NO)cc2)c2cccc2n1                                                                                                                                                                               | 1181        |
| 894 | 1096 | O=C(NO)c1ccc(Cl)c(NC(=O)c2ccc(Cl)cc2Cl)c1                                                                                                                                                                             | 1184        |
| 895 | 1097 | O=C(NO)c1ccc(CNc2cccc3ccnc23)cc1                                                                                                                                                                                      | 1190        |
| 896 | 1098 | O=C(CCCCCC(=O)Nc1cccc(-c2cn(C3CCCC3)nn2)c1)NO                                                                                                                                                                         | 1190        |
| 897 | 1100 | CC[C@H]1OC(=O)[C@H](C)C(=O)[C@H](C)[C@@H](O[C@@H]2O[C@H](C)C[C@H](N(C)Cc3ccccc3-c3cn(CCCCC(=O)NO)nn3)[C@H]2O)[C@@](C)(OC)C[C@@H](C)C2=NCCN3C(=O)O[C@@]1(C)[C@H]3[C@H]2C                                               | 1190        |
| 898 | 1101 | O=C(NO)c1cc(Cn2c(=O)n(CCc3ccccc3)c(=O)c3ccccc32)cs1                                                                                                                                                                   | 1191        |
| 899 | 1102 | O=C(NO)c1ccc(CN2CCCC2)cc1                                                                                                                                                                                             | 1200        |
| 900 | 1103 | CC(C)[C@@H]1NC(=O)[C@]2(C)CSC(=N2)c2coc(n2)CNC(=O)C[C@@H]1(/C=C/CCS)OC1=O                                                                                                                                             | 1200        |
| 901 | 1105 | O=C(NO)c1ccc(C2CCCC2)cc1                                                                                                                                                                                              | 1200        |
| 902 | 1106 | Fe1ccc2c(c1)C1=NCCN1C(=S)S2                                                                                                                                                                                           | 1200        |
| 903 | 1107 | O=C(CCCCC(Cc1cccc1)C(=O)NO)Nc1cccc1                                                                                                                                                                                   | 1200        |
| 904 | 1108 | Fe1cc(Br)cc2c1C1=NCCN1C(=S)S2                                                                                                                                                                                         | 1200        |
| 905 | 1110 | CC[C@H](C)[C@H]1NC(=O)[C@@H](CS)NC(=O)[C@@H](CCSC)NC(=O)C[C@@H]1(/C=C/CCS)OC(=O)C[C@@H]1O                                                                                                                             | 1200        |
| 906 | 1111 | O=C(/C=C/c1csc(Br)n1)NO                                                                                                                                                                                               | 1200        |
| 907 | 1112 | O=C(CCCCCC(=O)Nc1ccc([C@H]2O[C@@H](CSc3nc(-c4cccc4)o3)C[C@@H](c3ccc(CO)cc3)O2)cc1)NO                                                                                                                                  | 1208.538499 |

|     |      |                                                                                                                                                                                                                                |             |
|-----|------|--------------------------------------------------------------------------------------------------------------------------------------------------------------------------------------------------------------------------------|-------------|
| 908 | 1113 | <chem>O=C(NO)c1ccc(CN2C(=O)CNC(=O)[C@H]2Cc2c[nH]c3ccccc23)cc1</chem>                                                                                                                                                           | 1210        |
| 909 | 1115 | <chem>COc1cc(NC(=O)NOCCCCC(=O)NO)c2nccc(C)c2c1</chem>                                                                                                                                                                          | 1220        |
| 910 | 1116 | <chem>COc1ccc(S(=O)(=O)NC2CNC3ccc(C(=O)NO)cc3C2)cc1OC</chem>                                                                                                                                                                   | 1220        |
| 911 | 1117 | <chem>CCOc1cc(C(C)(C)C)ccc1C1=NC(c2ccc(Cl)cc2)C(c2ccc(Cl)cc2)N1C(=O)N1CCN(CCCCCC(=O)NO)CC1</chem>                                                                                                                              | 1224        |
| 912 | 1118 | <chem>O=C(NCCc1cc(C(=O)NO)no1)c1ccc(Cl)c(Cl)c1</chem>                                                                                                                                                                          | 1230        |
| 913 | 1120 | <chem>COc1cc2c(cc1OC)C(=O)C(CC1CCN(Cc3cccc(NC(=O)CCCCC(=O)NO)c3)CC1)C2</chem>                                                                                                                                                  | 1240        |
| 914 | 1121 | <chem>O=C(NO)c1ccc(Cn2ccc3cc(C(=O)c4ccc(F)cc4)ccc32)cc1</chem>                                                                                                                                                                 | 1240        |
| 915 | 1122 | <chem>CC(C)[C@H](NC(=O)[C@H](CCCCN)NC(=O)[C@H](CCCN)C(=N)N)NC(=O)[C@H](CCCCN)NC(=O)[C@H](CCCCN)CC(=O)[C@H](CCCCN)NC(=O)[C@@H]1CCCN1C(=O)CNC(=O)CNC(=O)CCc1cn(-c2ccc(-c3cn(CCCCCC(=O)NO)nn3)cc2)nn1)C(=O)NCC(=O)NCC(N)=O</chem> | 1243        |
| 916 | 1123 | <chem>Cc1ccc(-c2noc(CNCc3ccc(C(=O)NO)cc3)n2)cc1</chem>                                                                                                                                                                         | 1250        |
| 917 | 1125 | <chem>COc1cc(C(=O)c2ccc3c(ccn3S(=O)(=O)c3ccccc(/C=C/C(=O)NO)c3)c2)cc(OC)c1OC</chem>                                                                                                                                            | 1260        |
| 918 | 1126 | <chem>O=C(NC1CCc2ccc(C(=O)NO)cc2C1)OCc1cccnc1</chem>                                                                                                                                                                           | 1270        |
| 919 | 1127 | <chem>Cc1nc2cc(/C=C/C(=O)NO)ccc2c(=O)n1Cc1ccccc1</chem>                                                                                                                                                                        | 1270        |
| 920 | 1128 | <chem>Oc1cccn(Cc2ccc2)c1=S</chem>                                                                                                                                                                                              | 1272        |
| 921 | 1130 | <chem>O=C(NO)c1cc2c(cc1F)CCC(NS(=O)(=O)c1ccc(Cl)cc1)C2</chem>                                                                                                                                                                  | 1280        |
| 922 | 1131 | <chem>CC[C@@H]1OC(=O)[C@H](C)[C@@H](O[C@@H]2C[C@](C)(OC)[C@H](O)[C@@H](C)O2)[C@@H](C)[C@@H](O[C@@H]2O[C@H](C)C[C@H](N(C)Cc3ccccc3-c3cn(CCCCCC(=O)NO)nn3)[C@H]2O)[C@](C)(O)C[C@@H](C)CN(C)[C@H](C)[C@@H](O)[C@]1(C)O</chem>     | 1280        |
| 923 | 1132 | <chem>O=C(/C=C/c1ccc(/C=N/OCc2c(F)c(F)c(F)c2F)cc1)NO</chem>                                                                                                                                                                    | 1290        |
| 924 | 1133 | <chem>CC(C)(C)OC(=O)N1Cc2cc(OCC(=O)NO)ccc2C[C@H]1C(=O)Nc1ccccc1</chem>                                                                                                                                                         | 1290        |
| 925 | 1135 | <chem>O=C(/C=C/C1CCN(Cc2csc3ccccc23)CC1)NO</chem>                                                                                                                                                                              | 1300        |
| 926 | 1136 | <chem>O=C(Cc1ccc(CCCc2ccc(C(F)F)cc2)cc1)NO</chem>                                                                                                                                                                              | 1300        |
| 927 | 1137 | <chem>Fc1ccc2c(c1)SC(=S)N1CCCN=C21</chem>                                                                                                                                                                                      | 1300        |
| 928 | 1138 | <chem>Cc1ccc2c(c1)C1=NCCN1C(=S)S2</chem>                                                                                                                                                                                       | 1300        |
| 929 | 1140 | <chem>CC(C)(C)C(=O)N1Cc2ccc(C(=O)NO)cc2C1</chem>                                                                                                                                                                               | 1300        |
| 930 | 1141 | <chem>Cn1ccccc1C(=O)N1Cc2ccc(C(=O)NO)cc2C1</chem>                                                                                                                                                                              | 1300        |
| 931 | 1142 | <chem>CC[C@H](C)[C@H](NC(=O)OC(C)(C)C(=O)N1CC2(C[C@@H]1C(=O)NCCCCC(=O)NO)SCCS2</chem>                                                                                                                                          | 1310        |
| 932 | 1143 | <chem>CN1CCN(NC(=O)c2ccc(C(=O)NO)c2)CC1</chem>                                                                                                                                                                                 | 1310        |
| 933 | 1145 | <chem>CN(c1ccc(OCCCC(=O)NO)cc1)c1ncnc2ccccc12</chem>                                                                                                                                                                           | 1326        |
| 934 | 1146 | <chem>O=C(CCCCN1C(=O)c2ccc3ccccc23)C1=O)NO</chem>                                                                                                                                                                              | 1327.480006 |
| 935 | 1147 | <chem>CCc1nc2cc(/C=C/C(=O)NO)ccc2c(=O)n1CCCc1ccccc1</chem>                                                                                                                                                                     | 1330        |
| 936 | 1148 | <chem>O=C(NO)c1ccc(C(=O)NCCc2ccncc2)cc1</chem>                                                                                                                                                                                 | 1330        |
| 937 | 1150 | <chem>CC(C)(C)OC(=O)N1CCC2(CC1)CN(Cc1ccc(C(=O)NO)s1)c1ccccc12</chem>                                                                                                                                                           | 1344        |
| 938 | 1151 | <chem>O=C(CCCCS)Nc1ccccc1</chem>                                                                                                                                                                                               | 1360        |
| 939 | 1152 | <chem>O=C(NO)c1ccc(CNCc2nc(-c3ccc(C(F)F)cc3)no2)cc1</chem>                                                                                                                                                                     | 1360        |
| 940 | 1153 | <chem>O=C(NO)c1ccc(Cn2c3c(c4ccccc42)S(=O)(=O)CC3)cc1</chem>                                                                                                                                                                    | 1378.404875 |
| 941 | 1155 | <chem>CC[C@H]1OC(=O)[C@H](C)[C@@H](O)[C@H](C)[C@@H](O[C@@H]2O[C@H](C)C[C@H](N(C)Cc3ccccc3-c4cn(CCCCCC(=O)NO)nn4)cc3)[C@H]2O)[C@](C)(OC)C[C@@H](C)C(=O)[C@H](C)[C@@H](O)[C@]1(C)O</chem>                                        | 1390        |
| 942 | 1156 | <chem>O=C(/C=C/c1ccccc(S(=O)(=O)n2ccc3ccncc32)c1)NO</chem>                                                                                                                                                                     | 1390        |
| 943 | 1157 | <chem>O=C(NCC12C[C@H]3C[C@@H](C1)C[C@@H](C2)C3)c1ccc2c(ccn2Cc2ccc(C(=O)NO)c(F)c2)c1</chem>                                                                                                                                     | 1390        |
| 944 | 1158 | <chem>CN(Cc1ccccc1)c1ccc2c3c(cccc13)C(=O)N(CCCCCC(=O)NO)C2=O</chem>                                                                                                                                                            | 1400        |

|     |      |                                                                                                                                                                                                                               |             |
|-----|------|-------------------------------------------------------------------------------------------------------------------------------------------------------------------------------------------------------------------------------|-------------|
| 945 | 1160 | <chem>N=C(N)NCCC[C@@H]1NC(=O)C[C@H](Cc2ccc(O)cc2)NC(=O)[C@H](Cc2ccc3ccccc23)NC(=O)[C@H](CCCCC(=O)O)NC1=O</chem>                                                                                                               | 1400        |
| 946 | 1161 | <chem>CCc1nc2cc(/C=C/C(=O)NO)c(F)cc2c(=O)n1CCc1ccccc1</chem>                                                                                                                                                                  | 1400        |
| 947 | 1162 | <chem>O=C(NO)[C@@H]1[C@H](c2ccccc2)[C@H]1c1ccc(-c2ncc(F)cn2)cc1</chem>                                                                                                                                                        | 1400        |
| 948 | 1163 | <chem>CCC(=O)CCCC[C@@H]1NC(=O)C[C@H](CC(C)C)NC(=O)[C@H](Cc2c[nH]c3ccccc23)NC(=O)[C@H](CCCCC(=O)C)NC1=O</chem>                                                                                                                 | 1400        |
| 949 | 1165 | <chem>Nc1nc(-c2ccco2)c2cnn(Cc3cccc(OCCCCC(=O)NO)c3)c2n1</chem>                                                                                                                                                                | 1408.9      |
| 950 | 1166 | <chem>O=C(CCCCCC(=O)NC1CCCC1)NO</chem>                                                                                                                                                                                        | 1410        |
| 951 | 1167 | <chem>COc1ccc(C(=O)c2ccc3c(ccn3S(=O)(=O)c3cccc(/C=C/C(=O)NO)c3)c2)cc1OC</chem>                                                                                                                                                | 1420        |
| 952 | 1168 | <chem>CN(c1ccc(OCC(=O)NO)cc1)c1ncnc2ccccc12</chem>                                                                                                                                                                            | 1422        |
| 953 | 1170 | <chem>O=C(CCCCCC(=O)N/N=C/c1ccc(N(c2ccccc2)c2ccccc2)cc1)NO</chem>                                                                                                                                                             | 1430        |
| 954 | 1171 | <chem>CC(C)(C)OC(=O)N1CCC(C(=O)N2CC3(C[C@H]2C(=O)NCCC(=O)NO)SCCS3)CC1</chem>                                                                                                                                                  | 1440        |
| 955 | 1172 | <chem>O=C(CCCCCNc1nc(Cl)nc2c1nnc2Cc1ccccc1)NO</chem>                                                                                                                                                                          | 1440        |
| 956 | 1173 | <chem>O=C(NO)c1ccc2c(c1)CC(Nc1nccc(-c3ccc(Oc4ccccc4)cc3)n1)CC2</chem>                                                                                                                                                         | 1440        |
| 957 | 1175 | <chem>O=C(NO)c1ccc(Cn2c(=O)n(CCc3ccccc3)c(=O)c3ccc(C(F)(F)F)cc32)cc1</chem>                                                                                                                                                   | 1440.999653 |
| 958 | 1176 | <chem>O=C(/C=C/c1ccc2c(c1)nc(CCc1ccccc1)n2Cc1ccccc1)NO</chem>                                                                                                                                                                 | 1450        |
| 959 | 1177 | <chem>O=C(CCCCCNc1ncnc2ccc(F)cc12)NO</chem>                                                                                                                                                                                   | 1460        |
| 960 | 1178 | <chem>O=C(NO)c1ccc2c(c1)CC(NS(=O)(=O)c1ccc(Cl)cc1)CN2</chem>                                                                                                                                                                  | 1460        |
| 961 | 1180 | <chem>Cc1nc(N(C)c2ccc(OCCCC(=O)NO)cc2)c2ccccc2n1</chem>                                                                                                                                                                       | 1465        |
| 962 | 1181 | <chem>C#CCN(C)CCCOc1cccc(NC(=O)CCCCC(=O)NO)c1Cl</chem>                                                                                                                                                                        | 1470        |
| 963 | 1182 | <chem>O=C(NO)c1ccc(CN2c3ccccc3Sc3ccccc32)cc1</chem>                                                                                                                                                                           | 1480        |
| 964 | 1183 | <chem>CN(C)c1ccc(-c2cn(CCCCCn3ccccc(O)c3=S)nn2)cc1</chem>                                                                                                                                                                     | 1482        |
| 965 | 1185 | <chem>Cc1ccc(C(=O)c2ccc3c(ccn3Cc3ccc(C(=O)NO)cc3)c2)cc1</chem>                                                                                                                                                                | 1490        |
| 966 | 1186 | <chem>CC(C)[C@@H]1NC(=O)[C@]2(C)CSC(=N2)c2cnc(c2)CNC(=O)C[C@@H](/C=C/CCS)NC1=O</chem>                                                                                                                                         | 1491        |
| 967 | 1187 | <chem>CCc1ccc(C#Cc2c(-c3ccccc3)nnn2[C@@H](Cc2ccccc2)C(=O)NO)cc1</chem>                                                                                                                                                        | 1500        |
| 968 | 1188 | <chem>O=C(CCCCC(=O)c1ccccc1)NO</chem>                                                                                                                                                                                         | 1500        |
| 969 | 1190 | <chem>O=C(NO)[C@@H]1[C@H](c2ccccc2)[C@H]1c1ccc2c(c1)CN(CC(F)(F)F)C2=O</chem>                                                                                                                                                  | 1500        |
| 970 | 1191 | <chem>O=C(CNC(=O)/C(Cc1ccc(O)c(Br)c1)=N/O)NO</chem>                                                                                                                                                                           | 1500        |
| 971 | 1192 | <chem>O=C(NO)c1ccc(CN2C(=O)CCc3cc(C4CC4)ccc32)cc1</chem>                                                                                                                                                                      | 1500        |
| 972 | 1193 | <chem>Cc1cc(Oc2ccccc2)nc(NC2CCc3ccc(C(=O)NO)cc3C2)n1</chem>                                                                                                                                                                   | 1500        |
| 973 | 1195 | <chem>CC(C)c1cc(C(=O)N2Cc3ccc(NC(=O)CCCCC(=O)NO)cc3C2)c(O)cc1O</chem>                                                                                                                                                         | 1510        |
| 974 | 1196 | <chem>O=C(NO)c1cc2c(cc1F)CCC(Nc1nccc(-c3ccccc3)n1)C2</chem>                                                                                                                                                                   | 1510        |
| 975 | 1197 | <chem>O=C(NO)c1ccc(CNCCN2c3ccccc3CCc3ccc(Cl)cc32)cc1</chem>                                                                                                                                                                   | 1510        |
| 976 | 1198 | <chem>O=C(NO)c1ccc2c(c1)CC(Nc1nccc(-c3ccc(Cl)cc3Cl)n1)CC2</chem>                                                                                                                                                              | 1520        |
| 977 | 1200 | <chem>O=C(CCCCCOc1cccc(-c2nnc(-c3ccccc3Cl)s2)c1)NO</chem>                                                                                                                                                                     | 1521        |
| 978 | 1201 | <chem>CC(C)[C@H](NC(=O)[C@H](CCCCN)NC(=O)[C@H](CCCN)C(=N)N)NC(=O)[C@H](CCCCN)NC(=O)[C@H](CCCCN)CC(=O)[C@H](CCCCN)NC(=O)[C@H]1CCCN1C(=O)CNC(=O)CNC(=O)CCc1cn(-c2ccc(-c3cn(CCCCCC(=O)NO)nn3)cc2)nn1)C(=O)NCC(=O)NCC(N)=O</chem> | 1528        |
| 979 | 1202 | <chem>COc1ccc(N(C)c2nc(C)nc3ccccc23)cc1OCCCCC(=O)NO</chem>                                                                                                                                                                    | 1531        |
| 980 | 1203 | <chem>O=C(CCCc1esc(/C=C/c2ccccc2)n1)NO</chem>                                                                                                                                                                                 | 1536        |
| 981 | 1205 | <chem>CC(C)c1cc(C(=O)N2CCc3cc(NC(=O)CCCCC(=O)NO)ccc32)c(O)cc1O</chem>                                                                                                                                                         | 1550        |
| 982 | 1206 | <chem>CC(C)c1cc(C(=O)N2CCc3cc(NCc4ccc(C(=O)NO)cc4)ccc32)c(</chem>                                                                                                                                                             | 1550        |

|      |      |                                                                                                                                                                                                                                     |             |
|------|------|-------------------------------------------------------------------------------------------------------------------------------------------------------------------------------------------------------------------------------------|-------------|
|      |      | O)cc1O                                                                                                                                                                                                                              |             |
| 983  | 1207 | COc1ccc(-c2ccc(/C=C/C=C/C(=O)NO)cc2)cc1                                                                                                                                                                                             | 1560        |
| 984  | 1208 | Nc1nc2nce(CNc3ccc(C(=O)N[C@@H](CCCC(=O)NCCCCCCC<br>CC(=O)NO)C(=O)O)cc3)nc2c(=O)[nH]1                                                                                                                                                | 1560        |
| 985  | 1210 | O=C(/C=C/C=C/c1cccn(CCc2ccc3ccccc3e2)c1=O)NO                                                                                                                                                                                        | 1582.32     |
| 986  | 1211 | Cc1c(C)n(Cc2ccc(C(=O)NO)cc2)c2ccccc12                                                                                                                                                                                               | 1584.89     |
| 987  | 1212 | Cc1nc2cc(/C=C/C(=O)NO)ccc2c(=O)n1CCc1c[nH]c2ccccc12                                                                                                                                                                                 | 1590        |
| 988  | 1213 | O=C(CCCCCC(=O)C(F)(F)F)Nc1ccccc1                                                                                                                                                                                                    | 1596.871942 |
| 989  | 1215 | Cc1c(O)c(O)c2c(c1C=O)[C@@H]1O[C@H](O2)c2c(C)c(O)c(O)c(O)c2C1=O                                                                                                                                                                      | 1600        |
| 990  | 1216 | COc1cc(C(=O)NN)ccc1COc1ccc(Cl)c(C)c1                                                                                                                                                                                                | 1600        |
| 991  | 1217 | COC(=O)c1ccc2ccccc2c1OCCCCCCCC(=O)NO                                                                                                                                                                                                | 1600        |
| 992  | 1218 | S=C1Sc2cc(Cl)ccc2C2=NCCN12                                                                                                                                                                                                          | 1600        |
| 993  | 1220 | S=C1Sc2ccc(Br)cc2C2=NCCCN12                                                                                                                                                                                                         | 1600        |
| 994  | 1221 | CC(C)(C)OC(=O)N1CCC2(CC1)CN(Cc1ccc(C(=O)NO)cc1)c1<br>ccccc12                                                                                                                                                                        | 1602        |
| 995  | 1222 | O=C(NO)c1ccc2c(c1)CC(NS(=O)(=O)c1cccc(OC(F)(F)F)c1)C<br>N2                                                                                                                                                                          | 1610        |
| 996  | 1223 | O=C(/C=C/C=C/c1ccc(Cl)cc1F)NCCCCC(=O)NO                                                                                                                                                                                             | 1619.7      |
| 997  | 1225 | CC(=O)SCC/C=C/[C@@H]1CC(=O)N[C@H](C(C)C)C(=O)N<br>[C@H](Cc2cn(C)cn2)C(=O)N[C@H](C(C)C)c2cn(nn2)CC(=O)<br>)O1                                                                                                                        | 1620        |
| 998  | 1226 | COc1cc2c(Oc3ccc(NC(=O)C4(C(=O)Nc5ccc(F)cc5)CC4)cc3F)<br>ccnc2cc1OCCCCC(=O)NO                                                                                                                                                        | 1630        |
| 999  | 1227 | O=C(NO)c1ccc(Cn2c(=O)n(CCc3ccccc3)c(=O)c3ccc(Cl)cc32)c<br>c1                                                                                                                                                                        | 1640        |
| 1000 | 1228 | Cn1c(=O)c(OCc2ccc(C(=O)NO)cc2)c(C2CCCC2)c2ccccc21                                                                                                                                                                                   | 1640        |
| 1001 | 1230 | O=C(NO)c1ccc2c(c1)CC(Nc1cccc(-c3ccc(Cl)c3)n1)CC2                                                                                                                                                                                    | 1660        |
| 1002 | 1231 | Cc1ccccc(-e2cn(CCCCn3ccccc(O)e3=S)nn2)c1                                                                                                                                                                                            | 1660        |
| 1003 | 1232 | Cc1c2ccc(N(C)c3ccnc(Nc4ccc(C(=O)NCCCCCCC(=O)NO)cc4<br>)n3)cc2nn1C                                                                                                                                                                   | 1660        |
| 1004 | 1233 | CC(C)c1cc(C(=O)N2CCc3cc(NC(=O)CCCCCCCC(=O)NO)c<br>cc32)c(O)cc1O                                                                                                                                                                     | 1670        |
| 1005 | 1235 | Cc1nc(N(C)c2ccc(OCCCC(=O)NO)cc2)c2ccccc2n1                                                                                                                                                                                          | 1698        |
| 1006 | 1236 | Cc1ccccc2c1C1=NCCN1C(=S)S2                                                                                                                                                                                                          | 1700        |
| 1007 | 1237 | O=C(CCCCCCn1cc(Nc2ncc(Cl)c(Nc3ccc(F)cc3)n2)cn1)NO                                                                                                                                                                                   | 1700        |
| 1008 | 1238 | O=C(NO)c1ccc(Cn2c3c(c4ccccc42)CS(=O)(=O)CC3)cc1                                                                                                                                                                                     | 1700        |
| 1009 | 1240 | O=C(NO)c1ccccc(CNc2ccccc2)c1                                                                                                                                                                                                        | 1700        |
| 1010 | 1241 | COc1ccc(/C=C(\C)C(=O)c2cc(OC)c(OC)c(OC)c2)cc1OCCCC(<br>=O)NO                                                                                                                                                                        | 1700        |
| 1011 | 1242 | O=C(CCc1ccc(-c2ccc(O)cc2)cc1)NO                                                                                                                                                                                                     | 1700        |
| 1012 | 1243 | CC[C@@H]1OC(=O)[C@@H](C)[C@H](O[C@H]2C[C@@]<br>(C)(OC)[C@@H](O)[C@H](C)O2)[C@@H](C)[C@H](O[C@<br>H]2O[C@@H](C)C[C@@H](N(C)C)[C@@H]2O)[C@](C)(O<br>)C[C@H](C)CN(Cc2ccc(-<br>c3cn(CCCCCC(=O)NO)nn3)cc2)[C@H](C)[C@H](O)[C@@<br>]1(C)O | 1700        |
| 1013 | 1245 | O=C(Nc1ccc2c(c1)N(Cc1ccc(C(=O)NO)cc1)CC2)Nc1ccc(Cl)c(<br>C(F)(F)F)c1                                                                                                                                                                | 1710        |
| 1014 | 1246 | COc1cc(-c2nc3cc(/C=C/C(=O)NO)ccc3n2C)ccc1OCc1ccccc1                                                                                                                                                                                 | 1710        |
| 1015 | 1247 | COc1ccc(NC(=O)[C@@H]2Cc3ccc(OCC(=O)NO)cc3CN2CC<br>Cc2ccccc2)cc1                                                                                                                                                                     | 1720        |
| 1016 | 1248 | N[C@@H](Cc1c[nH]c2ccccc12)C(=O)Nc1ccccc1-<br>c1ccc(NC(=O)CCCCC(=O)NO)cc1                                                                                                                                                            | 1720        |
| 1017 | 1250 | CCc1c2c(nc3ccc(OCc4en(CCCC(=O)NO)nn4)cc13)-<br>c1cc3c(c(=O)n1C2)COC(=O)[C@]3(O)CC                                                                                                                                                   | 1726        |
| 1018 | 1251 | O=C(CCN1CCN(C(=O)Nc2ccnc3ccccc23)CC1)NO                                                                                                                                                                                             | 1740        |
| 1019 | 1252 | CN(C)c1ccc(NC(=O)NCCCCC(=O)NO)cc1                                                                                                                                                                                                   | 1740        |

|      |      |                                                                                                                                                                                                                                 |      |
|------|------|---------------------------------------------------------------------------------------------------------------------------------------------------------------------------------------------------------------------------------|------|
| 1020 | 1253 | <chem>Cc1nc2cc(/C=C/C(=O)NO)ccc2c(=O)n1CCc1cccc1</chem>                                                                                                                                                                         | 1750 |
| 1021 | 1255 | <chem>CC(C)c1cc(C(=O)N2CCc3onc(C(=O)NCCCCCCC(=O)NO)c3C2)c(O)cc1O</chem>                                                                                                                                                         | 1760 |
| 1022 | 1256 | <chem>O=C(NO)c1ccc(Cn2c(=O)n(CCc3cccc(C(F)(F)F)c3)c(=O)c3ccc32)cc1</chem>                                                                                                                                                       | 1760 |
| 1023 | 1257 | <chem>O=C(/C=C/C/c1ccc2c(c1)C(=O)CC1(CCN(Cc3cccc3)CC1)O2)NO</chem>                                                                                                                                                              | 1760 |
| 1024 | 1258 | <chem>Cc1cccc(NC(=O)[C@@H]2Cc3ccc(OCC(=O)NO)cc3CN2C(=O)OC(C)(C)C)c1</chem>                                                                                                                                                      | 1770 |
| 1025 | 1260 | <chem>O=C(NO)c1ccc(C(=O)NCCCN2c3cccc3CCc3ccc(Cl)cc32)cc1</chem>                                                                                                                                                                 | 1780 |
| 1026 | 1261 | <chem>O=C(NO)c1ccc2c(c1)CC(Nc1ncc3cc(F)ccc3n1)CC2</chem>                                                                                                                                                                        | 1780 |
| 1027 | 1262 | <chem>O=C(CCCCCCNc1cccc1)NO</chem>                                                                                                                                                                                              | 1800 |
| 1028 | 1263 | <chem>CCc1nc(N)nc(N)c1-c1ccc(/C=C/C(=O)NO)cc1</chem>                                                                                                                                                                            | 1800 |
| 1029 | 1265 | <chem>CC(=O)SCC/C=C/[C@@H]1CC(=O)N[C@H](C(C)C)C(=O)N[C@H](Cc2cccc2)C(=O)N[C@H](C(C)C)c2cn(nn2)CC(=O)O1</chem>                                                                                                                   | 1800 |
| 1030 | 1266 | <chem>COc1ccc(CNCCCCCCC(=O)NO)cc1OC</chem>                                                                                                                                                                                      | 1800 |
| 1031 | 1267 | <chem>Fc1ccc2c(c1)C1=NCCCN1C(=S)S2</chem>                                                                                                                                                                                       | 1800 |
| 1032 | 1268 | <chem>O=C(Cc1cccc2cccc12)Nc1ccc(C(=O)NO)nc1</chem>                                                                                                                                                                              | 1810 |
| 1033 | 1270 | <chem>CC[C@H]1OC(=O)[C@@H](C)[C@H](O[C@H]2C[C@@](C)(OC)[C@](O)(CN(C)Cc3ccc(-c4cn(CCCCC(=O)NO)nn4)cc3)[C@H](C)O2)[C@H](C)[C@H](O[C@H]2O[C@H](C)C[C@H](N(C)C)[C@H]2O)[C@@](C)(OC)C[C@H](C)C(=O)[C@@H](C)[C@H](O)[C@@]1(C)O</chem> | 1820 |
| 1034 | 1271 | <chem>COC[C@@H]1CCCN1Cc1ccc(C(=O)NO)cc1</chem>                                                                                                                                                                                  | 1820 |
| 1035 | 1272 | <chem>COC[C@@H]1CCCC1c1ccc(C(=O)NO)cc1</chem>                                                                                                                                                                                   | 1820 |
| 1036 | 1273 | <chem>O=C(CCCCCc1nc(-c2ccnc2)no1)NO</chem>                                                                                                                                                                                      | 1830 |
| 1037 | 1275 | <chem>O=C(CCCC(=O)NCCCN1c2cccc2CCc2ccc(Cl)cc21)NO</chem>                                                                                                                                                                        | 1850 |
| 1038 | 1276 | <chem>CC(C)(C)OC(=O)N1CC2(C[C@H]1C(=O)NCCCCC(=O)NO)SCCS2</chem>                                                                                                                                                                 | 1860 |
| 1039 | 1277 | <chem>COc1ccc(-c2noc(CCCCCC(=O)C(F)(F)F)n2)cc1</chem>                                                                                                                                                                           | 1860 |
| 1040 | 1278 | <chem>CN(C)c1ccc(-n2cc(Cn3cccc(O)c3=S)nn2)cc1</chem>                                                                                                                                                                            | 1868 |
| 1041 | 1280 | <chem>CCCNc1nc(Cl)nc2c1nn2Cc1ccc(C(=O)Nc2cccc2N)cc1</chem>                                                                                                                                                                      | 1880 |
| 1042 | 1281 | <chem>O=C(O)CCn1c(CCc2cccc2)nc2cc(/C=C/C(=O)NO)ccc21</chem>                                                                                                                                                                     | 1890 |
| 1043 | 1282 | <chem>O=C(CCCCN(Cc1cccc1)Cc1cccc1)NO</chem>                                                                                                                                                                                     | 1900 |
| 1044 | 1283 | <chem>O=C(NO)c1ccc(CNCc2ccsc2)cc1</chem>                                                                                                                                                                                        | 1900 |
| 1045 | 1285 | <chem>O=C(CCCCCN1CCc2cccc2C1)NO</chem>                                                                                                                                                                                          | 1900 |
| 1046 | 1286 | <chem>O=C(NO)c1ccc(CN2c3cccc3C3C2CCS3(=O)=O)cc1</chem>                                                                                                                                                                          | 1900 |
| 1047 | 1287 | <chem>N#Cc1cc(-c2cccc2)ccc1Cn1cccc(O)c1=S</chem>                                                                                                                                                                                | 1907 |
| 1048 | 1288 | <chem>CN1CC2(CCN(Cc3ccc(C(=O)NO)cc3)CC2)c2cccc21</chem>                                                                                                                                                                         | 1910 |
| 1049 | 1290 | <chem>CC(C)N(Cc1ccc(C(=O)NO)cc1)C(C)C</chem>                                                                                                                                                                                    | 1920 |
| 1050 | 1291 | <chem>O=C(NO)c1cccc1</chem>                                                                                                                                                                                                     | 1920 |
| 1051 | 1292 | <chem>O=C(CCCCCc1nc(-c2ccsc2)no1)NO</chem>                                                                                                                                                                                      | 1920 |
| 1052 | 1293 | <chem>COc1ccc(NC(=O)[C@@H]2Cc3ccc(OCC(=O)NO)cc3CN2Cc2cccc2)cc1</chem>                                                                                                                                                           | 1920 |
| 1053 | 1295 | <chem>CC[C@H](Nc1ncnc2[nH]cnc12)c1nc(CCCCC(=O)NO)c2cccc2n1</chem>                                                                                                                                                               | 1937 |
| 1054 | 1296 | <chem>CCC(=O)CCCC[C@H](NC(=O)C1CCC2(CC1)CN(C)C2)c1ncc(-c2cc3cccc3nc2OC)[nH]1</chem>                                                                                                                                             | 1947 |
| 1055 | 1297 | <chem>O=C(NO)c1ccc(Cn2ccc3cc(C(=O)NCC45C[C@H]6C[C@@H](C4)C[C@@H](C5)C6)ccc32)cc1</chem>                                                                                                                                         | 1950 |
| 1056 | 1298 | <chem>Nc1cccc(-c2csc(NC(=O)CCCCC(=O)NO)n2)c1</chem>                                                                                                                                                                             | 1950 |
| 1057 | 1300 | <chem>CNC(=O)c1ccc(C(=O)NO)cc1</chem>                                                                                                                                                                                           | 1950 |
| 1058 | 1301 | <chem>CC(C)c1cc(C(=O)N2CCc3cc(NC(=O)CCCC(=O)NO)ccc32)c(O)cc1O</chem>                                                                                                                                                            | 1960 |
| 1059 | 1302 | <chem>O=C(CCCCCCNc1nnc2ccc(Cl)cc12)NO</chem>                                                                                                                                                                                    | 1970 |
| 1060 | 1303 | <chem>O=C(CCCCCC(=O)Nc1ccc(-c2cn(-c3cccc3)nn2)cc1)NO</chem>                                                                                                                                                                     | 1970 |

|      |      |                                                                                                       |             |
|------|------|-------------------------------------------------------------------------------------------------------|-------------|
| 1061 | 1305 | <chem>Cc1nc2c(c(N(C)c3ccc(OCCCC(=O)NO)cc3)n1)CCC2</chem>                                              | 1987        |
| 1062 | 1306 | <chem>O=C(/C=C/c1ccc(NC(=O)Nc2ccc(Cl)c(C(F)(F)F)c2)cc1)NO</chem>                                      | 1990        |
| 1063 | 1307 | <chem>O=C(CCCCCC(=O)Nc1cccc(-c2n(Cc3cccc3)nn2)c1)NO</chem>                                            | 1990        |
| 1064 | 1308 | <chem>C[C@H](CN1CCC[C@H]1C)NC(=O)c1ccc(-c2noc(C(F)(F)F)n2)cc1</chem>                                  | 2000        |
| 1065 | 1310 | <chem>O=C(NO)c1ccc(CN2c3cc(C(F)(F)F)ccc3CCC[C@H]3CCCC[C@H]32)cc1</chem>                               | 2000        |
| 1066 | 1311 | <chem>CN(/N=C/c1cccc(C(=O)NO)c1)C(=O)c1ccc(N(C)C)cc1</chem>                                           | 2000        |
| 1067 | 1312 | <chem>C/C(=C\Cc1ccc(NS(=O)(=O)c2cccc2)cc1)CC(=O)NO</chem>                                             | 2000        |
| 1068 | 1313 | <chem>O=C(NO)c1ccc(CCCS(=O)(=O)c2cccc2)cc1</chem>                                                     | 2000        |
| 1069 | 1315 | <chem>O=C(/C=C/c1ccc(OC[C@H](Cc2c[nH]c3cccc23)NC(=O)c2cc(Cl)cc2)cc1)NO</chem>                         | 2000.8      |
| 1070 | 1316 | <chem>CC(C)Cn1cnc2c(NCCCCC(=O)NO)nc(Cl)nc21</chem>                                                    | 2010        |
| 1071 | 1317 | <chem>O=C(CCCCCC(=O)Nc1ccc(-c2cnn2Cc2ccc(F)cc2)cc1)NO</chem>                                          | 2010        |
| 1072 | 1318 | <chem>CC(C)c1cc(C(=O)N2Cc3ccc(NC(=O)CCCC(=O)NO)cc3C2)c(O)cc1O</chem>                                  | 2011        |
| 1073 | 1320 | <chem>O=C(/C=C/c1ccc2ccnc2c1)NCCCCC(=O)NO</chem>                                                      | 2028.3      |
| 1074 | 1321 | <chem>CCCN1CCC2(CC1)C[C@H]2C(=O)N[C@H](CCCCC(=O)CC)c1ncc(-c2cc3cccc3nc2OC)[nH]1</chem>                | 2033        |
| 1075 | 1322 | <chem>O=C(CCCCCc1nc(-c2cccc2)no1)NO</chem>                                                            | 2050        |
| 1076 | 1323 | <chem>Cc1cc(Cn2ccc3cc(C(=O)NCC45C[C@H]6C[C@H](C4)C[C@H](C5)C6)ccc32)ccc1C(=O)NO</chem>                | 2060        |
| 1077 | 1325 | <chem>N#Cc1ccc(-c2ccc(Cn3cccc(O)c3=S)cc2)cc1</chem>                                                   | 2075        |
| 1078 | 1326 | <chem>O=C(CCCCCc1nc(-c2ccc(Cl)cc2)no1)C(F)(F)F</chem>                                                 | 2080        |
| 1079 | 1327 | <chem>COc1cc(C(=O)c2csc(-c3ccc(NC(=O)c4ccc(C(=O)Nc5cccc5N)cc4)cc3)n2)cc(OC)c1OC</chem>                | 2080        |
| 1080 | 1328 | <chem>Cc1cc(C)c(CNC(=O)c2enn(-c3cccc(NC(=O)CCCCC(=O)NO)c3)c2C)c(=O)[nH]1</chem>                       | 2080        |
| 1081 | 1330 | <chem>CCC(=O)CCCC[C@H]1NC(=O)[C@H](C)N(C)C(=O)C[C@H](CC(C)C)NC(=O)[C@H](Cc2c[nH]c3cccc23)NC1=O</chem> | 2097.617696 |
| 1082 | 1331 | <chem>CC(C)(C)C(=O)N1CCc2cc(C(=O)NO)ccc2C1</chem>                                                     | 2100        |
| 1083 | 1332 | <chem>O=C(NO)c1ccc(Cl)c(OCc2cccc2Cl)c1</chem>                                                         | 2100        |
| 1084 | 1333 | <chem>CC(C)(CNC(=O)c1cccc(-c2noc(C(F)(F)F)n2)c1)c1coc(-c2cccc2)n1</chem>                              | 2100        |
| 1085 | 1335 | <chem>Cc1c(O)c(O)c(C=O)c1-c1cc2c(C=O)c(C)c(O)c(O)c2o1</chem>                                          | 2100        |
| 1086 | 1336 | <chem>Cn1cccc1C(=O)N1CCc2cc(C(=O)NO)ccc2C1</chem>                                                     | 2100        |
| 1087 | 2056 | <chem>O=C(CCCCCNCc1ccc([N+](=O)[O-])cc1)NO</chem>                                                     | 2100        |
| 1088 | 2057 | <chem>O=C(NO)c1ccc(COc2no[n+](=[O-])c2S(=O)(=O)c2cccc2)cc1</chem>                                     | 2100        |
| 1089 | 1337 | <chem>CC(/C=C/c1cccc1)=C\C(=O)NCCCCC(=O)NO</chem>                                                     | 2116.3      |
| 1090 | 1338 | <chem>COc1ccc(CNC(=O)c2cc(F)ccc2N2CCOCC2)cc1/C=C/C(=O)NO</chem>                                       | 2120        |
| 1091 | 1340 | <chem>O=C(NO)c1ccc2c(c1)CC(Nc1cccc(-c3cccc3)n1)CC2</chem>                                             | 2130        |
| 1092 | 1341 | <chem>Cc1cc(Cl)ccc1-c1cnc(NC2CCc3ccc(C(=O)NO)cc3C2)n1</chem>                                          | 2150        |
| 1093 | 1342 | <chem>COc1cc2c(cc1OC)C(=O)C(CC1CCN(Cc3ccc(NCc4ccc(C(=O)NO)cc4)cc3)CC1)C2</chem>                       | 2150        |
| 1094 | 1343 | <chem>O=C(/C=C/c1cccc(S(=O)(=O)NCCCN2c3cccc3CCc3ccc(Cl)c32)c1)NO</chem>                               | 2160        |
| 1095 | 1345 | <chem>COc1cc(C(=O)c2ccc3c(ccn3Cc3ccc(/C=C/C(=O)NO)cc3)c2)cc(OC)c1OC</chem>                            | 2170        |
| 1096 | 1346 | <chem>COc1cc(OCc2cccc(-c3cccc3)c2C)cc(OC)c1CNCCCCC(=O)NO</chem>                                       | 2175        |
| 1097 | 1347 | <chem>O=C(NO)c1cccc(N(Cc2cccc2)Cc2cccc2)c1</chem>                                                     | 2190        |
| 1098 | 1348 | <chem>CN(C)c1ccc(C(=O)N/N=C/c2cccc(C(=O)NO)c2)cc1</chem>                                              | 2200        |
| 1099 | 1350 | <chem>O=C(NO)c1ccc2c(c1)CC(Nc1cccc(-c3ccc(Cl)cc3)n1)CC2</chem>                                        | 2200        |
| 1100 | 1351 | <chem>CCC(=O)CCCC[C@H]1NC(=O)[C@H](C)NC(=O)C[C@H](CC(C)C)NC(=O)[C@H](Cc2c[nH]c3cccc23)NC1=O</chem>    | 2200        |
| 1101 | 1352 | <chem>O=C(NO)c1cn(-c2cc(Cl)ccc2Oc2ccc(F)cc2)nn1</chem>                                                | 2200        |

|      |      |                                                                                                                                                                                                                               |      |
|------|------|-------------------------------------------------------------------------------------------------------------------------------------------------------------------------------------------------------------------------------|------|
| 1102 | 1353 | CC[C@@H]1OC(=O)[C@@H](C)[C@H](O[C@@H]2C[C@](C)(OC)[C@@](O)(CN(C)C)[C@@H](C)O2)[C@H](C)[C@H](O[C@@H]2O[C@H](C)C[C@H](N(C)Cc3ccc(-c4cn(CCCCCC(=O)NO)nn4)cc3)[C@H]2O)[C@@](C)(OC)C[C@H](C)C(=O)[C@@H](C)[C@@H](O)[C@@]1(C)O      | 2210 |
| 1103 | 1355 | N#Cc1ccc2c(c1)CCCN2Cc1ccc(C(=O)NO)cc1                                                                                                                                                                                         | 2220 |
| 1104 | 1356 | O=C1CCC[C@@H](C(=O)N[C@@H](CCCCS)C(=O)N2CCc3ccccc3C2)N1                                                                                                                                                                       | 2230 |
| 1105 | 1357 | CC[C@@H]1OC(=O)[C@H](C)[C@@H](O[C@H]2C[C@@](C)(OC)[C@](O)(CN(C)Cc3ccc(-c4cn(CCC(=O)NO)nn4)cc3)[C@H](C)O2)[C@@H](C)[C@@H](O[C@@H]2O[C@H](C)C[C@H](N(C)C)[C@H]2O)[C@](C)(O)C[C@@H](C)CN(C)[C@H](C)[C@@H](O)[C@]1(C)O            | 2230 |
| 1106 | 1358 | Ic1ncccn1                                                                                                                                                                                                                     | 2240 |
| 1107 | 1360 | CC[C@H]1OC(=O)[C@H](C)C(=O)[C@H](C)[C@@H](O[C@@H]2O[C@H](C)C[C@H](N(C)Cc3ccc(-c4cn(CCCC(=O)NO)nn4)cc3)[C@H]2O)[C@@](C)(OC)C[C@@H](C)C2=NCCN3C(=O)O[C@@]1(C)[C@H]3[C@H]2CCOc1ccc(CNC(=O)c2cc(C(=O)Nc3ccccc3N)ccc2N2CCOCC2)cc1O | 2240 |
| 1108 | 1361 | CCC(=O)CCCC[C@H](NC(=O)[C@H]1CC12CCN(C(C)=O)CC2)c1ncc(-c2cc3ccccc3nc2OC)[nH]1                                                                                                                                                 | 2244 |
| 1109 | 1362 | CC(C)[C@@H](C(=O)NO)n1nnc(-c2ccccc2)c1C#Cc1ccccc1                                                                                                                                                                             | 2271 |
| 1110 | 1363 | Fc1ccc2c1C1=NCCCN1C(=S)S2                                                                                                                                                                                                     | 2300 |
| 1111 | 1365 | CC(C)C[C@H]1CC(=O)N[C@@H](C)C(=O)N[C@@H](CCC(=O)O)C(=O)N[C@@H](Cc2c[nH]c3ccccc23)C(=O)N1                                                                                                                                      | 2300 |
| 1112 | 1366 | O=C(COc1ccc2ccccc2c1/C=C1SC(=O)NC1=O)Nc1ccc([N+](=O)[O-])cc1                                                                                                                                                                  | 2300 |
| 1113 | 2058 | Nc1ncnc2c1c(-c1ccc(Cl)cc1)nn2-c1cccc(-c2nnn2CCCCC(=O)NO)c1                                                                                                                                                                    | 2311 |
| 1114 | 1367 | CC[C@H]1OC(=O)[C@H](C)[C@@H](O)[C@H](C)[C@@H](O[C@@H]2O[C@H](C)C[C@H](N(C)Cc3ccc(NC(=O)CCCC(=O)NO)cc3)[C@H]2O)[C@](C)(O)C[C@@H](C)CN(C)[C@H](C)[C@@H](O)[C@]1(C)O                                                             | 2320 |
| 1115 | 1368 | O=C(/C=C/c1ccc2cc(Oc3ccc([N+](=O)[O-])cc3)ccc2n1)NO                                                                                                                                                                           | 2320 |
| 1116 | 2059 | O=C(CCCCCC(=O)NCCCN1e2ccccc2CCc2ecc(Cl)cc21)NO                                                                                                                                                                                | 2330 |
| 1117 | 1370 | O=C(CCCCCCS)NC1CCCC1                                                                                                                                                                                                          | 2330 |
| 1118 | 1371 | O=C(NO)c1ccc(CN2C(=O)CNC(=O)[C@H]2Cc2ccccc2)cc1                                                                                                                                                                               | 2330 |
| 1119 | 1372 | O=C(CCc1ccccc1)NO                                                                                                                                                                                                             | 2340 |
| 1120 | 1373 | Nc1nc2ncc(CNc3ccc(C(=O)N[C@@H](CCC(=O)NCCCCCCC(=O)NO)C(=O)O)cc3)nc2c(=O)[nH]1                                                                                                                                                 | 2340 |
| 1121 | 1375 | CCNc1nc(Cl)nc2c1nen2Cc1ccc(C(=O)Nc2ccccc2N)cc1                                                                                                                                                                                | 2370 |
| 1122 | 1376 | CC[C@H]1OC(=O)[C@H](C)[C@@H](O[C@@H]2C[C@](C)(OC)[C@H](O)[C@@H](C)O2)[C@H](C)[C@@H](O[C@@H]2O[C@H](C)C[C@H](N(C)C)[C@H]2O)[C@@](C)(O)C[C@@H](C)CN(Cc2ccc(-c3cn(CCCCCC(=O)NO)nn3)cc2)[C@@H](C)[C@@H](O)[C@]1(C)O               | 2370 |
| 1123 | 1377 | O=C(NO)c1ccc(CN(c2ccccc2)c2ccccc2)cc1                                                                                                                                                                                         | 2370 |
| 1124 | 1378 | Nc1nc2ncc(CNc3ccc(C(=O)N[C@@H](CCC(=O)NCCCCCCC(=O)NO)C(=O)O)cc3)nc2c(=O)[nH]1                                                                                                                                                 | 2380 |
| 1125 | 1380 | O=C(CCCCCOe1cccc(-c2nnc(-c3ccccc3)s2)c1)NO                                                                                                                                                                                    | 2390 |
| 1126 | 1381 | O=C(CCc1ccc(CC(=O)c2ccccc2)o1)NO                                                                                                                                                                                              | 2390 |
| 1127 | 1382 | O=C(/C=C/C1CCN(CCc2ccccc2)CC1)NO                                                                                                                                                                                              | 2400 |
| 1128 | 1383 | O=C(NO)c1ccc(Cn2c3c(c4cc(F)ccc42)C[S+](O)CC3)cc1                                                                                                                                                                              | 2400 |
| 1129 | 2061 | Cc1ccccc1-c1cn(CCCCN2cccc(O)c2=S)nn1                                                                                                                                                                                          | 2400 |
| 1130 | 1385 | O=C(NO)c1ccc2c(c1)CC(NC(=O)c1ccc(Cl)cc1)CN2                                                                                                                                                                                   | 2402 |
| 1131 | 1386 | CCCCNNC(=O)c1ccc(-c2ccccc2)cc1                                                                                                                                                                                                | 2410 |
| 1132 | 1387 | CC[C@@H]1OC(=O)[C@@H](C)[C@H](O[C@H]2C[C@@](C)(OC)[C@](O)(CN(C)Cc3ccc(-c4cn(CCCCCC(=O)NO)nn4)cc3)[C@H](C)O2)[C@@H](C)[C@@H](O[C@@H]2O[C@H](C)C[C@H](N(C)C)[C@H]2O)[C@](C)(O)C[C@@H](C)CN(C)[C@H](C)[C@@H](O)[C@]1(C)O         | 2430 |
| 1133 | 1388 | CC[C@@H]1OC(=O)[C@@H](C)[C@H](O[C@H]2C[C@@](C)(OC)[C@](O)(CN(C)Cc3ccc(-c4cn(CCCCCC(=O)NO)nn4)cc3)[C@H](C)O2)[C@@H](C)[C@@H](O[C@@H]2O[C@H](C)C[C@H](N(C)C)[C@H]2O)[C@](C)(O)C[C@@H](C)CN(C)[C@H](C)[C@@H](O)[C@]1(C)O         | 2450 |

|      |      |                                                                                                                                                                                                                       |             |
|------|------|-----------------------------------------------------------------------------------------------------------------------------------------------------------------------------------------------------------------------|-------------|
|      |      | (C)(OC)[C@@H](O)[C@H](C)O2[C@H](C)[C@H](O[C@@H]2O[C@H](C)C[C@H](N(C)Cc3ccc(-c4cn(CCC(=O)NO)nn4)cc3)[C@H]2O)[C@@](C)(OC)C[C@H](C)C(=O)[C@@H](C)[C@@H](O)[C@@]1(C)O                                                     |             |
| 1134 | 1390 | Cc1nc2cc(/C=C/C(=O)NO)ccc2c(=O)n1-c1ccccc1                                                                                                                                                                            | 2456.298028 |
| 1135 | 1391 | CN(c1ccc(OCCCC(=O)NO)cc1)c1ncnc2ccccc12                                                                                                                                                                               | 2457        |
| 1136 | 1392 | O=C(CCCCCN1C(=O)c2cccc3c(NCc4cccc4)ccc(c23)C1=O)NO                                                                                                                                                                    | 2460        |
| 1137 | 1393 | O=C(CCCCCn1cc(Nc2ccc(Cl)c(Nc3ccc(Cl)cc3)n2)cn1)NO                                                                                                                                                                     | 2470        |
| 1138 | 1395 | O=C(NO)c1ccc(CNC(=O)N2CCC3(CC2)CN(Cc2ccccc2)c2ccc(c23)cc1                                                                                                                                                             | 2480        |
| 1139 | 1396 | Cc1cccc(-c2ccc(Cn3cccc(O)c3=S)cc2)c1                                                                                                                                                                                  | 2496        |
| 1140 | 1397 | O=C(/C=C/C1CCN(Cc2ccccc2)CC1)NO                                                                                                                                                                                       | 2500        |
| 1141 | 1398 | O=C(CCCCc1cnc(-c2ccccc2)n1)NO                                                                                                                                                                                         | 2515        |
| 1142 | 1400 | CC[C@H]1OC(=O)[C@H](C)[C@@H](O[C@@H]2C[C@](C)(OC)[C@@](O)(CN(C)Cc3ccc(-c4cn(CCCC(=O)NO)nn4)cc3)[C@@H](C)O2)[C@@H](C)[C@@H](O[C@H]2O[C@H](C)C[C@@H](N(C)C)[C@@H]2O)[C@](C)(OC)C[C@H](C)C(=O)[C@H](C)[C@H](O)[C@@]1(C)O | 2530        |
| 1143 | 1401 | Cc1ccc(-c2cn(CCCCCn3cccc(O)c3=S)nn2)cc1                                                                                                                                                                               | 2533        |
| 1144 | 1402 | C/C=C1\NC(=O)c2csc(n2)[C@@H](C(C)C)NC(=O)C[C@@H](/C=C/CCS)OC(=O)[C@H](C(C)C)NC1=O                                                                                                                                     | 2550        |
| 1145 | 1403 | CC(C)(C)OC(=O)N1Cc2cc(OCC(=O)NO)ccc2C[C@H]1C(=O)Nc1ccc(F)cc1                                                                                                                                                          | 2560        |
| 1146 | 2062 | O=C(CCCCCc1nc(-c2ccc([N+](=O)[O-])cc2)no1)NO                                                                                                                                                                          | 2560        |
| 1147 | 1405 | CCC(=O)CCCC[C@H](NC(=O)CC1CC2(C1)CN(C)C2)c1nc(-c2cc3cccc3nc2OC)[nH]1                                                                                                                                                  | 2573        |
| 1148 | 1406 | CN(C)c1ccc2c(SNCCCCC(=O)NO)ccc12                                                                                                                                                                                      | 2580        |
| 1149 | 1407 | CC(C)(C)OC(=O)Nc1cccc(-c2csc(NC(=O)CCCCC(=O)NO)n2)c1                                                                                                                                                                  | 2580        |
| 1150 | 1408 | CC(C)(C)OC(=O)Nc1cccc(-c2csc(NC(=O)CCCCC(=O)NO)n2)c1                                                                                                                                                                  | 2580        |
| 1151 | 1410 | O=C(NO)c1ccc2c(c1)CC(NC(=O)c1ccc(Cl)c(Cl)c1)CN2                                                                                                                                                                       | 2630        |
| 1152 | 1411 | CCC(=O)CCCC[C@H](NC(=O)C1CC2(C1)CN(C)C2)c1ncc(-c2cc3cccc3nc2OC)[nH]1                                                                                                                                                  | 2657        |
| 1153 | 1412 | O=C(CCCCCC(=O)Nc1ccc(-c2ccccc2NC(=O)[C@@H]2CCCN2)cc1)NO                                                                                                                                                               | 2660        |
| 1154 | 1413 | CC1(C)NC(=O)C[C@H](Cc2c[nH]c3cccc23)NC(=O)[C@H](Cc2cccc3cccc23)NC(=O)[C@H](CCCCC(=O)O)NC1=O                                                                                                                           | 2670        |
| 1155 | 1415 | CC(C)(C)OC(=O)N1Cc2cc(OCC(=O)NO)ccc2C[C@H]1C(=O)NCCc1ccccc1                                                                                                                                                           | 2670        |
| 1156 | 1416 | CCCc1ccc2c(c1)CCC(=O)N2Cc1ccc(C(=O)NO)cc1                                                                                                                                                                             | 2680        |
| 1157 | 1417 | O=C(NO)c1ccc2c(c1)CC(Nc1ccc(F)cc1)CC2                                                                                                                                                                                 | 2680        |
| 1158 | 1418 | O=C(NO)c1ccc(C(c2ccccc2)c2ccccc2)n1                                                                                                                                                                                   | 2700        |
| 1159 | 1420 | CN(C)c1ccc2c(c1)SC(=S)N1CCCN=C21                                                                                                                                                                                      | 2700        |
| 1160 | 1421 | O=C(COc1ccc2cc(/C=C3/SC(=O)NC3=O)ccc2c1)Nc1nc2ccccc2s1                                                                                                                                                                | 2700        |
| 1161 | 1422 | COc1cc(C(=O)c2csc(-c3ccc(/C=C/C(=O)NO)cc3)n2)cc(OC)c1OC                                                                                                                                                               | 2710        |
| 1162 | 2063 | [N-]=[N+]=Nc1ccc(-c2csc(NC(=O)CCCCC(=O)NO)n2)cc1                                                                                                                                                                      | 2710        |
| 1163 | 1423 | CN(C)c1ccc(C(=O)N(CCCCC(=O)NO)CC(=O)NCc2ccccc2)c1                                                                                                                                                                     | 2750        |
| 1164 | 1425 | O=C(/C=C/c1ccc(S(=O)(=O)n2ccc3cc(C(=O)c4ccc(F)cc4)ccc32)c1)NO                                                                                                                                                         | 2750        |
| 1165 | 1426 | O=C(NO)c1ccc(Cn2c(=O)n(CCC3cccc3)c(=O)c3ccc(O)cc32)c1                                                                                                                                                                 | 2751        |
| 1166 | 1427 | CC[C@H]1OC(=O)[C@H](C)[C@@H](O[C@@H]2C[C@](C)(OC)[C@H](O)[C@@H](C)O2)[C@H](C)[C@@H](O[C@@                                                                                                                             | 2770        |

|      |      |                                                                                                                                                                         |             |
|------|------|-------------------------------------------------------------------------------------------------------------------------------------------------------------------------|-------------|
|      |      | H]2O[C@H](C)C[C@H](N(C)C)[C@H]2O)[C@@](C)(O)C[C@@H](C)CN(Cc2ccc(-c3cn(CCCC(=O)NO)nn3)cc2)[C@@H](C)[C@@H](O)[C@]1(C)O                                                    |             |
| 1167 | 1428 | CCC(=O)CCCC[C@H](NC(=O)[C@H]1CC12CCCN(C)C2)c1ncc(-c2cc3ccccc3nc2OC)[nH]1                                                                                                | 2778        |
| 1168 | 1430 | Oc1cccn(Cc2ccc(-c3cncnc3)cc2)c1=S                                                                                                                                       | 2780        |
| 1169 | 1431 | O=C(NCCN1CCCC1)c1ccc(-c2noc(C(F)(F)F)n2)cc1                                                                                                                             | 2800        |
| 1170 | 1432 | CCC(=O)CCCC[C@H](NC(=O)[C@H]1CC12CCN(CC)CC2)c1ncc(-c2ccc3cncnc3c2)[nH]1                                                                                                 | 2800        |
| 1171 | 1433 | O=C(NO)c1ccc(CC(=O)N(CCO)c2ccccc2)cc1                                                                                                                                   | 2800        |
| 1172 | 1435 | Cc1cc(CNCCCCC(=O)NO)ccc1F                                                                                                                                               | 2800        |
| 1173 | 1436 | O=CN(O)CCCCC(=O)Nc1ccccc1                                                                                                                                               | 2800        |
| 1174 | 1437 | CCc1nc(N)nc(N)c1-c1ccc(-c2cn(CCCCC(=O)NO)nn2)cc1                                                                                                                        | 2800        |
| 1175 | 1438 | Cc1ccc(N)c(NC(=O)c2ccc(CNC(=O)OCc3ccnc3)cc2)c1                                                                                                                          | 2800        |
| 1176 | 1440 | COc1ccc(C(=O)c2ccc3c(cen3Cc3ccc(/C=C/C(=O)NO)cc3)c2)c1                                                                                                                  | 2810        |
| 1177 | 1441 | CCCCN(C(=O)c1ccc(Br)cc1                                                                                                                                                 | 2817.800561 |
| 1178 | 1442 | O=C(NO)c1ccc(CN2CCCCc3cc(-c4cc[nH]n4)ccc32)cc1                                                                                                                          | 2820        |
| 1179 | 1443 | COc1cc(Oc2ccc3nc(/C=C/C(=O)NO)ccc3c2)cc(OC)c1OC                                                                                                                         | 2820        |
| 1180 | 1445 | N#Cc1cccc(-c2cn(CCCCN3cccc(O)c3=S)nn2)c1                                                                                                                                | 2831        |
| 1181 | 1446 | O=C(NO)c1ccc2c(c1)CC(NC(=O)c1ccc(-c3ccccc3)cc1)CN2                                                                                                                      | 2850        |
| 1182 | 1447 | CC[C@H]1OC(=O)[C@H](C)C(=O)[C@H](C)[C@@H](O)[C@@H]2O[C@H](C)C[C@H](N(C)Cc3ccc(-c4cn(CC(=O)NO)nn4)cc3)[C@H]2O)[C@@](C)(OC)C[C@@H](C)C2=NCCN3C(=O)O[C@@]1(C)[C@H]3[C@H]2C | 2850        |
| 1183 | 1448 | CN(C)c1ccc(-c2ccc(Cn3cccc(O)c3=S)cc2)cc1                                                                                                                                | 2858        |
| 1184 | 1450 | Cc1c2ccc(N(C)c3ccnc(Nc4ccc(/C=C/C(=O)NO)cc4)n3)cc2nn1C                                                                                                                  | 2890        |
| 1185 | 1451 | COc1ccc(CNC(=O)[C@H](CCC(=O)O)NC(=O)Cc2ccc(Br)cc2)cc1                                                                                                                   | 2890        |
| 1186 | 2064 | O=C(O)CC[C@@H](NC(=O)Cc1ccc(Br)cc1)C(=O)NCc1ccc([N+](=O)[O-])cc1                                                                                                        | 2890        |
| 1187 | 1452 | O=C(NO)c1ccc2c(c1)CC(Nc1cccc1)CC2                                                                                                                                       | 2900        |
| 1188 | 1453 | CCCN(CCC)C[C@@H](C)NC(=O)c1ccc(-c2noc(C(F)(F)F)n2)cc1                                                                                                                   | 2900        |
| 1189 | 1455 | O=C(NO)c1ccc(CN2c3ccccc3CC[C@@H]3CCCC[C@H]32)cc1                                                                                                                        | 2900        |
| 1190 | 1456 | CC1(NCC(=O)NCc2ccc(/C=C/C(=O)NO)cc2)CCN(c2cnc(-c3cccc(Cl)c3Cl)c(N)n2)CC1                                                                                                | 2900        |
| 1191 | 1457 | N#CCc1ccc(-c2ccc(/C=C/C(=O)NO)cc2Cl)cc1C12CC3CC(CC(C3)C1)C2                                                                                                             | 2910        |
| 1192 | 1458 | CCCCN(Cc1ccc(C(=O)NO)cc1)C(=O)CCCN1cc(COc2cccc(Cc3cnc(NC(=O)CSc4nc(C)cc(C)n4)s3)c2)nn1                                                                                  | 2940        |
| 1193 | 1460 | O=C(CCCCCNC(=O)c1cc(-c2ccc(F)cc2)[nH]n1)NO                                                                                                                              | 2951        |
| 1194 | 1461 | Cc1nc2c(c(N(C)c3ccc(OCC(=O)NO)cc3)n1)CCC2                                                                                                                               | 2974        |
| 1195 | 1462 | O=C(CCCCc1cnc(Cc2cccc(-c3ccccc3)c2)n1)NO                                                                                                                                | 2984        |
| 1196 | 1463 | CCC(=O)CCCC[C@H](NC(=O)[C@H]1CC12CCN(CC)CC2)c1nnc(-c2cc3ccccc3nc2OC)[nH]1                                                                                               | 2988        |
| 1197 | 1465 | C[C@]12CC[C@@H]3c4ccc(O)cc4CC[C@H]3[C@@H]1CC[C@@]2(O)c1cn(CCCCCC(=O)NO)nn1                                                                                              | 3000        |
| 1198 | 1466 | CC(=O)CCCC[C@H](NC1CCCCN1C)C(=O)Nc1nc(-c2ccccc2)es1                                                                                                                     | 3000        |
| 1199 | 1467 | CC(=O)CCCC[C@H](NC(=O)C1CCCCN1C)C(=O)Nc1nc(-c2ccccc2)es1                                                                                                                | 3000        |
| 1200 | 1468 | O=C(NO)c1cccc(S(=O)(=O)N[C@@H](Cc2c[nH]c3ccccc23)C(=O)Nc2ccccc2)c1                                                                                                      | 3000        |
| 1201 | 1470 | O=C(CCCCCOc1cccc(-c2nnc(-c3ccccc3)s2)c1)NO                                                                                                                              | 3025        |
| 1202 | 1471 | O=C(O)CC[C@H](NC(=O)Cc1ccc(Br)cc1)C(=O)NCc1ccccc1                                                                                                                       | 3030        |

|      |      |                                                                                                                                                                           |      |
|------|------|---------------------------------------------------------------------------------------------------------------------------------------------------------------------------|------|
| 1203 | 1472 | CC(C)(C)c1cc(CN(C(=O)c2cccc(C(F)(F)F)c2)c2ccc(C(=O)NO)cc2)cc(C(C)(C)C)c1                                                                                                  | 3030 |
| 1204 | 1473 | CN(c1nccc(-c2cccnc2)n1)C1CCc2ccc(C(=O)NO)cc2C1                                                                                                                            | 3040 |
| 1205 | 1475 | O=C(NO)c1ccc(Cn2c(=O)n(Cc3cccc3)c(=O)c3ccc(C4CC4)c32)cc1                                                                                                                  | 3060 |
| 1206 | 1476 | CCC(=O)CCCC[C@H](NC(=O)[C@H]1CC12CCOCC2)c1ncc(-c2cc3cccc3nc2OC)[nH]1                                                                                                      | 3089 |
| 1207 | 1477 | O=C(CCCCC(=O)NCCCN1c2cccc2CCc2ccc(Cl)cc21)NO                                                                                                                              | 3090 |
| 1208 | 1478 | CCC(=O)CCCC[C@H](NC(=O)[C@H]1CC12CCN(CC)CC2)c1ncc(-c2cc3cn(C)nc3cc2OC)[nH]1                                                                                               | 3100 |
| 1209 | 1480 | O=C(NO)c1sc2cccc2c1Cl                                                                                                                                                     | 3100 |
| 1210 | 1481 | CCC(=O)CCCC[C@H](NC(=O)[C@H]1CC12CCN(C)CC2)c1ncc(C2=CC3SC=NC3C=C2)[nH]1                                                                                                   | 3100 |
| 1211 | 1482 | Cc1cccc1-c1ccc(Cn2cccc(O)c2=S)cc1                                                                                                                                         | 3105 |
| 1212 | 1483 | COc1cc(C(=O)c2csc(-c3ccc(/C=C/C(=O)Nc4cccc4N)cc3)n2)cc(OC)c1OC                                                                                                            | 3110 |
| 1213 | 1485 | CCC(=O)CCCC[C@H](NC(=O)[C@H]1CC12CCN(CC1CC1)CC2)c1ncc(-c2cc3cccc3nc2OC)[nH]1                                                                                              | 3129 |
| 1214 | 1486 | O=C(CCCCCC(=O)Nc1ccc(-c2cn(CC(O)c3cccc(Br)c3)nn2)cc1)NO                                                                                                                   | 3130 |
| 1215 | 1487 | CC(C)n1ene2c(NCCCCC(=O)NO)nc(N)nc21                                                                                                                                       | 3130 |
| 1216 | 1488 | Cc1cc(C)cc(C(=O)N(CC(=O)NCc2cccc2)Cc2ccc(C(=O)Nc3cc(-c4cccc4)ccc3N)cc2)c1                                                                                                 | 3130 |
| 1217 | 1490 | O=C(NO)c1ccc(COC(=O)N2CCC3(CC2)CN(Cc2cccc2)c2ccc3cc23)cc1                                                                                                                 | 3190 |
| 1218 | 1491 | Cc1cc2cc(NCc3cc(C(=O)NO)ccc3Cl)ccc2n(C)c1=O                                                                                                                               | 3193 |
| 1219 | 1492 | O=C(NO)c1ccc(CNCc2cccs2)cc1                                                                                                                                               | 3200 |
| 1220 | 1493 | S=C1Sc2c(Cl)cccc2C2=NCCN12                                                                                                                                                | 3200 |
| 1221 | 1495 | CC[C@H]1OC(=O)[C@H](C)C(=O)[C@H](C)[C@@H](O[C@@H]2O[C@H](C)C[C@H](N(C)Cc3ccc(-c4cn(CCCCC(=O)NO)nn4)cc3)[C@H]2O)[C@@](C)(OC)C[C@@H](C)C2=NCCN3C(=O)O[C@@]1(C)[C@H]3[C@H]2C | 3210 |
| 1222 | 1496 | CC[C@H]1OC(=O)[C@H](C)C(=O)[C@H](C)[C@@H](O[C@@H]2O[C@H](C)C[C@H](N(C)Cc3ccc(-c4cn(CCCCC(=O)NO)nn4)c3)[C@H]2O)[C@@](C)(OC)C[C@@H](C)C2=NCCN3C(=O)O[C@@]1(C)[C@H]3[C@H]2C  | 3230 |
| 1223 | 1497 | CCC(=O)CCCC[C@H](NC(=O)[C@H]1CC12CCN(Cc1ccc(OC)cc1)CC2)c1ncc(-c2cc3cccc3nc2OC)[nH]1                                                                                       | 3231 |
| 1224 | 1498 | COc1cc(C(=O)c2csc(-c3ccc(NC(=O)CCCC(=O)NO)cc3)n2)cc(OC)c1OC                                                                                                               | 3280 |
| 1225 | 1500 | O=C(O)c1cccc(=S)n1O                                                                                                                                                       | 3300 |
| 1226 | 1501 | Cc1cccc(C(=O)NO)c1                                                                                                                                                        | 3300 |
| 1227 | 1502 | Cn1cccc1C(=O)N1CCn2cc(C(=O)NO)cc2C1                                                                                                                                       | 3300 |
| 1228 | 1503 | Oc1cccn(CCCn2cc(-c3cccc3)nn2)c1=S                                                                                                                                         | 3303 |
| 1229 | 1505 | O=C(CCCCOc1cc(-c2cccc2)on1)NO                                                                                                                                             | 3320 |
| 1230 | 1506 | COc1cccc(-c2ccc3c(NC(=O)C4CCC(C(=O)NO)CC4)n[nH]c3e2)c1                                                                                                                    | 3340 |
| 1231 | 1507 | CN(c1cccc1Cl)S(=O)(=O)C1CC2OC1C(c1ccc(NC(=O)CCCCC(=O)O)cc1)=C2c1ccc(O)cc1                                                                                                 | 3350 |
| 1232 | 1508 | O=C(NO)c1ccc2c(c1)CC(NC(=O)c1ccc(Cl)c1)CN2                                                                                                                                | 3370 |
| 1233 | 1510 | COc1ccc(N(C)c2nc(C)nc3cccc23)cc1OCCCC(=O)NO                                                                                                                               | 3398 |
| 1234 | 1511 | O=C(N[C@@H](CCCCNC(=O)c1ncccc1O)c1ncc(-c2ccc3cccc3c2)[nH]1)c1ncs1                                                                                                         | 3400 |
| 1235 | 1512 | CCC(=O)CCCC[C@H](NC(=O)[C@H]1CC12CCN(C)CC2)c1ncc(-c2enc3ncccc3c2)[nH]1                                                                                                    | 3400 |
| 1236 | 1513 | CC(C)(C)OC(=O)N1Cc2cc(OCC(=O)NO)ccc2C[C@H]1C(=O)NCc1cccc1                                                                                                                 | 3410 |
| 1237 | 1515 | Nc1cccc(-c2cc(C(=O)NCCCC(=O)NO)no2)c1                                                                                                                                     | 3430 |
| 1238 | 1516 | O=C(NO)c1ccc(CN2C(=O)C(Cc3cccc3)N(Cc3ccnc3)C2=O)c                                                                                                                         | 3441 |

|      |      |                                                                                                                                                                                                                                      |             |
|------|------|--------------------------------------------------------------------------------------------------------------------------------------------------------------------------------------------------------------------------------------|-------------|
|      |      | c1                                                                                                                                                                                                                                   |             |
| 1239 | 1517 | Nc1ccc(-c2cc(C(=O)NCCCCC(=O)NO)no2)cc1                                                                                                                                                                                               | 3458        |
| 1240 | 1518 | CN1CCC2(CC1)c1cccc1N(Cc1ccc(C(=O)NO)cc1)C2c1cccc1<br>F                                                                                                                                                                               | 3490        |
| 1241 | 1520 | O=C(CNS(=O)(=O)c1cccc(C(=O)NO)c1)Nc1cccc1                                                                                                                                                                                            | 3500        |
| 1242 | 1521 | O=C(NO)c1ccc(CNCc2cccc2)cc1                                                                                                                                                                                                          | 3500        |
| 1243 | 1522 | CC(C)[C@H](NC(=O)[C@H](CCCCN)NC(=O)[C@H](CCCN<br>C(=N)N)NC(=O)[C@H](CCCCN)NC(=O)[C@H](CCCCN)CC<br>(=O)[C@H](CCCCN)NC(=O)[C@@H]1CCCN1C(=O)CNC(=O)<br>CNC(=O)CCCc1cn(-c2ccc(-<br>c3cn(CCCCC(=O)NO)nn3)cc2)nn1)C(=O)NCC(=O)NCC(N)<br>=O | 3503        |
| 1244 | 1523 | COc1cccc(C(=O)c2ccc3c(ccn3S(=O)(=O)c3ccc(/C=C/C(=O)N<br>O)c3)c2)c1                                                                                                                                                                   | 3530        |
| 1245 | 1525 | COc1ccc2[nH]cc(CCN(Cc3ccc(C(=O)NO)cc3)C(=O)/C=C/c3c<br>cc(O)c(OC)c3)c2c1                                                                                                                                                             | 3569.0036   |
| 1246 | 1526 | O=C(CCCNC(=O)c1cc(-c2cccc2)on1)NO                                                                                                                                                                                                    | 3580        |
| 1247 | 1527 | CCC(=O)CCCC[C@H](NC(=O)[C@H]1CC12CCN(C)CC2)c<br>1ncc(-c2ccc3ncnc3c2)[nH]1                                                                                                                                                            | 3600        |
| 1248 | 1528 | O=C(CCC1C(=O)N(c2ccc(Cl)cc2)C(=O)N1Cc1cccc1)Nc1ccc<br>(C(=O)NO)cc1                                                                                                                                                                   | 3600        |
| 1249 | 1530 | O=C(NCC1(c2nc(-c3cccc3)cs2)CCOCC1)c1cccc(-<br>c2noc(C(F)(F)F)n2)c1                                                                                                                                                                   | 3600        |
| 1250 | 1531 | CCC(=O)CCCC[C@H](NC(=O)[C@H]1CC12CCN(C)CC2)c<br>1ncc(-c2cc3cnc3nc2OC)[nH]1                                                                                                                                                           | 3600        |
| 1251 | 1532 | O=C(NO)c1ccc(CN2CCC3cc(Cl)ccc32)cc1                                                                                                                                                                                                  | 3607.587092 |
| 1252 | 1533 | CC(C)(C)OC(=O)Nc1ccc(-<br>c2cc(C(=O)NCCCC(=O)NO)no2)cc1                                                                                                                                                                              | 3650        |
| 1253 | 1535 | Oc1ccc[nH]c1=S                                                                                                                                                                                                                       | 3675        |
| 1254 | 1536 | CCc1nc2ccc(/C=C/CC(=O)NO)cc2c(=O)n1-c1cccc1                                                                                                                                                                                          | 3690        |
| 1255 | 1537 | CCC(=O)CCCC[C@H](NC(=O)[C@H]1CC12CCN(C)CC2)c<br>1ncc(-c2cc3cnc3cc2OC)[nH]1                                                                                                                                                           | 3700        |
| 1256 | 1538 | CC(C)[C@H]1NC(=O)[C@@H](C)[C@@H](C/C=C\CCC(=O)<br>O)NC(=O)[C@@H](Cc2cccc2)NC(=O)[C@@H](C)NC1=O                                                                                                                                       | 3700        |
| 1257 | 1540 | O=C(NO)C1CCCC1                                                                                                                                                                                                                       | 3720        |
| 1258 | 1541 | CC(C)c1cc(C(=O)N2Cc3ccc(NC(=O)CCCCCCCC(=O)NO)c<br>c3C2)c(O)cc1O                                                                                                                                                                      | 3720        |
| 1259 | 1542 | N#Cc1ccc(NC2CCc3ccc(C(=O)NO)cc3C2)cc1Cl                                                                                                                                                                                              | 3730        |
| 1260 | 1543 | Cc1nc2ccc(/C=C/CC(=O)NO)cc2c(=O)n1-c1cccc1                                                                                                                                                                                           | 3730        |
| 1261 | 1545 | COc1ccc(-c2ncc(/C=C/C(=O)NO)s2)cc1                                                                                                                                                                                                   | 3740        |
| 1262 | 2066 | O=C(NO)c1ccc2c(c1)CC(Nc1ccc([N+](=O)[O-])cc1)CC2                                                                                                                                                                                     | 3740        |
| 1263 | 1546 | O=C(NO)c1ccc2c(c1)CC(Nc1nccc(-c3ccc4cccc4c3)n1)CC2                                                                                                                                                                                   | 3780        |
| 1264 | 1547 | Cc1ccc(NC(=O)[C@@H]2Cc3ccc(OCC(=O)NO)cc3CN2C(=O)<br>)OC(C)(C)C)c1                                                                                                                                                                    | 3780        |
| 1265 | 1548 | O=C(CCCCCNC(=O)c1ccc2cccc2c1)NO                                                                                                                                                                                                      | 3790        |
| 1266 | 1550 | CCC(=O)CCCC[C@H](NC(=O)[C@H]1CC12CCN(C)CC2)c<br>1ncc(-c2cc3ccc(C4CC4)nc3cc2OC)[nH]1                                                                                                                                                  | 3800        |
| 1267 | 1551 | CC[C@H](Nc1ncnc2[nH]enc12)c1nc2cccc(CCc3ccc(C(=O)NO<br>)cc3)c2c(=O)n1-c1cccc1                                                                                                                                                        | 3840        |
| 1268 | 1552 | CC1=C(C)C(=O)C(CONC(=O)CCCCC(=O)Nc2cccc2)=C(<br>C)C1=O                                                                                                                                                                               | 3842        |
| 1269 | 1553 | COc1ccc(/C=C/C(=O)c2cc(OC)c(OC)c(OC)c2)cc1OCCCCC<br>C(=O)NO                                                                                                                                                                          | 3880        |
| 1270 | 1555 | CCC(=O)CCCC[C@H](NC(=O)[C@H]1CC12CCN(C)CC2)c<br>1ncc(-c2cc3ccc(C)nc3cc2OC)[nH]1                                                                                                                                                      | 3900        |
| 1271 | 1556 | CN(c1cccc2cccc12)S(=O)(=O)C1CC2OC1C(c1ccc(NC(=O)C<br>CCCCC(=O)O)cc1)=C2c1ccc(O)cc1                                                                                                                                                   | 3940        |
| 1272 | 1557 | C/C=C1\NC(=O)c2csc(n2)CNC(=O)C[C@@H](/C=C/CCSC(=O)<br>O)CCCCC)OC(=O)[C@H](C(C)C)NC1=O                                                                                                                                                | 3960        |

|      |      |                                                                                                                                                                                                                                  |         |
|------|------|----------------------------------------------------------------------------------------------------------------------------------------------------------------------------------------------------------------------------------|---------|
| 1273 | 1558 | <chem>O=C(CCCCCC(=O)Nc1ccc(-c2cn(Cc3ccccc3)nn2)cc1)NO</chem>                                                                                                                                                                     | 3970    |
| 1274 | 1560 | <chem>CN1CCe2c(n(Cc3ccc(C(=O)NO)cc3)c3ccccc23)C1</chem>                                                                                                                                                                          | 3981.07 |
| 1275 | 1561 | <chem>O=C(NO)c1ccc(CN2C(=O)C(Cc3ccccc3)N(Cc3ccc(Cl)cc3)C2=O)cc1</chem>                                                                                                                                                           | 3987.5  |
| 1276 | 1562 | <chem>O=C(CCCc1ccccc1)NO</chem>                                                                                                                                                                                                  | 4000    |
| 1277 | 1563 | <chem>Cc1ccccc1NC(=O)[C@@H]1Cc2ccc(OCC(=O)NO)cc2CN1C(=O)OC(C)C</chem>                                                                                                                                                            | 4000    |
| 1278 | 1565 | <chem>O=CN(O)CCCCC(=O)Nc1ccccc1</chem>                                                                                                                                                                                           | 4000    |
| 1279 | 1566 | <chem>O=C(CCCCCN(Cc1ccccc1)Cc1ccccc1)NO</chem>                                                                                                                                                                                   | 4000    |
| 1280 | 1567 | <chem>C[C@]12CC[C@@H]3c4ccc(O)cc4CC[C@H]3[C@@H]1CC[C@@]2(O)c1cn(CCCCC(=O)NO)nn1</chem>                                                                                                                                           | 4000    |
| 1281 | 2067 | <chem>O=C(COc1ccc2cc(/C=C3/SC(=O)NC3=O)ccc2c1)Nc1ccc([N+](=O)[O-])cc1</chem>                                                                                                                                                     | 4000    |
| 1282 | 1568 | <chem>O=C(CCCCN1C(=O)c2ccc3c(Nc4ccccc4)ccc(c23)C1=O)NO</chem>                                                                                                                                                                    | 4070    |
| 1283 | 1570 | <chem>O=C(CCCCN1C(=O)c2ccc3c(Nc4ccccc4)ccc(c23)C1=O)NO</chem>                                                                                                                                                                    | 4090    |
| 1284 | 2068 | <chem>O=C(CCCCCC(=O)Nc1nc(-c2cccc([N+](=O)[O-])c2)cs1)NO</chem>                                                                                                                                                                  | 4090    |
| 1285 | 1571 | <chem>O=C(CCCCCN(Cc1ccc(-c2ccccc2)s1)Cc1ccc(-c2ccccc2)s1)NO</chem>                                                                                                                                                               | 4100    |
| 1286 | 1572 | <chem>Nc1ccccc1NC(=O)c1ccc(CNc2nc(-c3ccccc3)cs2)cc1</chem>                                                                                                                                                                       | 4100    |
| 1287 | 1573 | <chem>O=C(CCCCCNC(=O)C(O)(O)C(F)(F)F)Nc1ccc(-c2ccccc2)cc1</chem>                                                                                                                                                                 | 4100    |
| 1288 | 1575 | <chem>COc1ccc2c1C(=O)c1c(O)c3c(c(O)c1C2=O)C[C@@](O)(C(C)=O)C[C@@H]3O[C@H]1C[C@H](NCe2ccc(-c3cn(CCCCC(=O)NO)nn3)cc2)[C@H](O)[C@H](C)O1</chem>                                                                                     | 4129    |
| 1289 | 1576 | <chem>CC12CC3CC(C)(C1)CC(NC(=O)CCCCC(=O)NO)(C3)C2</chem>                                                                                                                                                                         | 4140    |
| 1290 | 1577 | <chem>O=C(NO)c1ccc(Cl)c(OCe2ccc(Cl)cc2Cl)c1</chem>                                                                                                                                                                               | 4150    |
| 1291 | 1578 | <chem>COc1cc(C(=O)c2csc(-c3ccc(NC(=O)CCCCC(=O)NO)cc3)n2)cc(OC)c1OC</chem>                                                                                                                                                        | 4170    |
| 1292 | 1580 | <chem>CC(=O)SCCCCCNC(=O)c1cc(-c2ccc(F)cc2)nn1C</chem>                                                                                                                                                                            | 4200    |
| 1293 | 1581 | <chem>O=C(CS)NCCCCC(=O)Nc1ccc(-c2ccccc2NC(=O)[C@@H]2CCCN2)cc1</chem>                                                                                                                                                             | 4230    |
| 1294 | 1582 | <chem>CC(C)(C)OC(=O)N1Cc2cc(OCC(=O)NO)ccc2C[C@H]1C(=O)Nc1ccc2ccccc12</chem>                                                                                                                                                      | 4250    |
| 1295 | 1583 | <chem>Oc1cccn(Cc2ccc(-c3ccccc3)cc2)c1=S</chem>                                                                                                                                                                                   | 4283    |
| 1296 | 1585 | <chem>CC[C@@H]1OC(=O)[C@H](C)[C@@H](O[C@@H]2C[C@](C)(OC)[C@H](O)[C@@H](C)O2)[C@@H](C)[C@@H](O)[C@@H]2O[C@H](C)C[C@H](N(C)Cc3ccccc3-c3cn(CCCCC(=O)NO)nn3)[C@H]2O)[C@](C)(O)C[C@@H](C)CN(C)[C@H](C)[C@@H](O)[C@]1(C)O</chem>       | 4300    |
| 1297 | 1586 | <chem>O=C(NO)c1ccc(CN2CCCCc3cc(Br)ccc32)cc1</chem>                                                                                                                                                                               | 4360    |
| 1298 | 1587 | <chem>CCC(=O)CCCC[C@H](NC(=O)[C@H]1CC12CCN(C)CC2)c1ccc(-c2ccc3ncccc3c2)[nH]1</chem>                                                                                                                                              | 4400    |
| 1299 | 1588 | <chem>CCCCCNC(=O)[C@@H]1Cc2ccc(OCC(=O)NO)cc2CN1C(=O)OC(C)C</chem>                                                                                                                                                                | 4420    |
| 1300 | 2069 | <chem>Nc1ccc(-c2cccs2)cc1NC(=O)c1ccc(-c2cn(C[S+](O-))c3ccccc3)nn2)cc1</chem>                                                                                                                                                     | 4454    |
| 1301 | 1590 | <chem>Cc1ccc(C(=O)c2ccc3c(ccn3S(=O)(=O)c3ccc(/C=C/C(=O)NO)c3)c2)cc1</chem>                                                                                                                                                       | 4480    |
| 1302 | 1591 | <chem>O=C(COc1ccc2cc(/C=C3/SC(=O)NC3=O)ccc2c1)Nc1ccccc1</chem>                                                                                                                                                                   | 4500    |
| 1303 | 1592 | <chem>CCC(=O)CCCC[C@H](NC(=O)[C@H]1CC12CCN(C)C)C2)c1ncc(-c2cc3ccc(C)nc3cc2OC)[nH]1</chem>                                                                                                                                        | 4500    |
| 1304 | 1593 | <chem>CC[C@H]1OC(=O)[C@@H](C)[C@H](O[C@@H]2C[C@](C)(OC)[C@@](O)(CN(C)Cc3ccc(-c4cn(CC(=O)NO)nn4)cc3)[C@@H](C)O2)[C@H](C)[C@H](O[C@H]2O)[C@@H](C)C[C@H](N(C)C)[C@@H]2O)[C@@](C)(O)C[C@H](C)CN(C)[C@@H](C)[C@H](O)[C@@]1(C)O</chem> | 4510    |
| 1305 | 1595 | <chem>CC(C)(C)NC(=O)[C@@H]1Cc2ccc(OCC(=O)NO)cc2CN1C(=</chem>                                                                                                                                                                     | 4580    |

|      |      |                                                                                                                                                                                                                 |             |
|------|------|-----------------------------------------------------------------------------------------------------------------------------------------------------------------------------------------------------------------|-------------|
|      |      | O)OC(C)(C)C                                                                                                                                                                                                     |             |
| 1306 | 1596 | O=C(CCCCCCN(Cc1cc2ccccc2[nH]1)Cc1cc2ccccc2[nH]1)NO                                                                                                                                                              | 4600        |
| 1307 | 1597 | COc1ccc(N)c(NC(=O)c2ccc(CNC(=O)OCc3ccccc3)cc2)c1                                                                                                                                                                | 4600        |
| 1308 | 1598 | Ic1ccccc1                                                                                                                                                                                                       | 4610        |
| 1309 | 1600 | CC1(C)c2ccccc2N(Cc2ccc(C(=O)NO)cc2)C1c1ccccc1                                                                                                                                                                   | 4640        |
| 1310 | 1601 | CCC(=O)CCCCC(NC(=O)c1cncs1)c1[nH]c(-c2ccccc2)nc1C(N)=O                                                                                                                                                          | 4701        |
| 1311 | 1602 | CC[C@H]1OC(=O)[C@H](C)[C@@H](O)[C@H](C)[C@@H](O)[C@@H]2O[C@H](C)C[C@H](N(C)Cc3ccc(-c4cn(CCCCC(=O)NO)nn4)cc3)[C@H]2O)[C@](C)(OC)C[C@@H](C)C(=O)[C@H](C)[C@@H](O)[C@]1(C)O                                        | 4750        |
| 1312 | 1603 | COc1ccc(-c2ccc3nc(/C=C/C(=O)NO)ccc3c2)cc1                                                                                                                                                                       | 4770        |
| 1313 | 1605 | O=C(CCCCCNC(=O)NC12CC3CC(CC(C3)C1)C2)NO                                                                                                                                                                         | 4815.391988 |
| 1314 | 1606 | CC(=O)Nc1ccc(-c2cc(C(=O)NCCCCC(=O)NO)no2)cc1                                                                                                                                                                    | 4900        |
| 1315 | 1607 | CCC(=O)CCCSC[C@@H]1NC(=O)[C@H](C)NC(=O)C[C@H](CC(C)C)NC(=O)[C@H](Cc2c[nH]c3ccccc23)NC1=O                                                                                                                        | 4909.989817 |
| 1316 | 1608 | COc1ccc(/C=C\C)C(=O)c2cc(OC)c(OC)c(OC)c2cc1OCCCCCCCC(=O)NO                                                                                                                                                      | 4910        |
| 1317 | 1610 | O=C(NO)c1ccc(OC2CCN(c3ccccc3)C2=O)cc1                                                                                                                                                                           | 4920        |
| 1318 | 1611 | CCC(=O)CCCC[C@H](NC(=O)[C@H]1CC12CCN(Cc1ccccc1)CC2)c1ccc(-c2cc3ccccc3nc2OC)[nH]1                                                                                                                                | 4924        |
| 1319 | 1612 | Nc1ccccc1NC(=O)c1cnc(NCc2ccccc2)cn1                                                                                                                                                                             | 4936.789746 |
| 1320 | 1613 | O=C(CCCC(=O)NCCc1ccccc1)NO                                                                                                                                                                                      | 5000        |
| 1321 | 1615 | Nc1ccccc1NC(=O)CCCCC(=O)Nc1ccccc1                                                                                                                                                                               | 5000        |
| 1322 | 1616 | CCOC(=O)NCCCC(=O)NCCc1ccccc1                                                                                                                                                                                    | 5000        |
| 1323 | 1617 | O=C(CCCCn1cc(Nc2ncc(Cl)c(Nc3ccc(F)cc3)n2)cn1)NO                                                                                                                                                                 | 5100        |
| 1324 | 1618 | COc1cc(C(=O)c2csc(-c3ccc(NC(=O)CCC(=O)NO)cc3)n2)cc(OC)c1OC                                                                                                                                                      | 5140        |
| 1325 | 1620 | COc1ccc(N(C)c2nc(C)nc3ccccc23)cc1OCCCCC(=O)NO                                                                                                                                                                   | 5189        |
| 1326 | 1621 | N[C@@H](Cc1ccccc1)C(=O)Nc1ccccc1-c1ccc(NC(=O)CCCCNC(=O)CS)cc1                                                                                                                                                   | 5190        |
| 1327 | 1622 | O=C(CCCCCC(=O)Nc1ccc(-c2cn(-c3ccc(C(F)(F)F)cc3)nn2)c1)NO                                                                                                                                                        | 5220        |
| 1328 | 1623 | CC(C)(C)OC(=O)Nc1ccc(-c2ncc(C(=O)NCCCCC(=O)NO)s2)cc1                                                                                                                                                            | 5220        |
| 1329 | 1625 | O=C(NO)[C@@H]1[C@H](c2ccccc2)[C@H]1c1ccc(-c2ncc(F)cn2)c1                                                                                                                                                        | 5300        |
| 1330 | 1626 | O=C(NO)c1ccc(CN2c3ccccc3C[C@@H]3CCCC[C@H]32)cc1                                                                                                                                                                 | 5300        |
| 1331 | 1627 | O=C(CCCCCCNC(=O)C(O)(O)C(F)(F)F)Nc1nc2ccccc2s1                                                                                                                                                                  | 5300        |
| 1332 | 1628 | Nc1ccccc1NC(=O)c1ccc(CS2nnc(-c3ccccc3)n2-c2ccccc2)cc1                                                                                                                                                           | 5320        |
| 1333 | 1630 | COc1cc(C(=O)c2ccc3c(cen3S(=O)(=O)c3ccc(/C=C/C(=O)NO)cc3)c2)cc(OC)c1OC                                                                                                                                           | 5340        |
| 1334 | 1631 | CC[C@@H]1OC(=O)[C@H](C)[C@@H](O[C@@H]2C[C@](C)(OC)[C@H](O)[C@@H](C)O2)[C@@H](C)[C@@H](O)[C@@H]2O[C@H](C)C[C@H](N(C)Cc3ccc(-c4cn(CCCCC(=O)NO)nn4)cc3)[C@H]2O)[C@](C)(O)C[C@@H](C)CN(C)[C@H](C)[C@@H](O)[C@]1(C)O | 5380        |
| 1335 | 1632 | CCC(=O)CCCC[C@H](NC(=O)C1CN(C)C1)c1[nH]c(-c2ccc(F)cc2)nc1C(N)=O                                                                                                                                                 | 5383        |
| 1336 | 1633 | Cc1ccc(-c2noc(CCCCCC(=O)NO)n2)cc1                                                                                                                                                                               | 5390        |
| 1337 | 1635 | S=C1Sc2cc(Cl)ccc2C2=NCCCN12                                                                                                                                                                                     | 5400        |
| 1338 | 1636 | CCC(=O)CCCC[C@H](NC(=O)[C@H]1CC12CCN(C)CC2)c1ccc(-c2ccc3nc(C4CC4)ccc3c2)[nH]1                                                                                                                                   | 5400        |
| 1339 | 1637 | CCC(=O)CCCC[C@H](NC(=O)C1CN(C)C1)c1[nH]c(-c2ccccc2)nc1C(N)=O                                                                                                                                                    | 5422        |
| 1340 | 1638 | Oc1cccn(Cc2ccc(Cn3cc(-c4ccccc4)nn3)cc2)c1=S                                                                                                                                                                     | 5470        |
| 1341 | 1640 | Cc1ccc(NC(=O)C(Cc2c[nH]c3ccccc23)NC(=O)c2ccc(C(=O)NO)cc2)cc1                                                                                                                                                    | 5500        |

|      |      |                                                                                                                                                                                                                             |             |
|------|------|-----------------------------------------------------------------------------------------------------------------------------------------------------------------------------------------------------------------------------|-------------|
| 1342 | 1641 | <chem>Nc1cccc1NC(=O)c1ccc(CNC2=N[C@@H](c3ccccc3)CN2)cc1</chem>                                                                                                                                                              | 5500        |
| 1343 | 1642 | <chem>CC1(C)c2ccccc(C(=O)NO)c2CN1c1cnc(C(F)(F)F)cn1</chem>                                                                                                                                                                  | 5600        |
| 1344 | 1643 | <chem>Br1cncs1</chem>                                                                                                                                                                                                       | 5600        |
| 1345 | 1645 | <chem>O=C(NO)c1ccc(CN2CCCCc3ccccc32)cc1</chem>                                                                                                                                                                              | 5610        |
| 1346 | 1646 | <chem>CCC(=O)CCCC[C@H](NC(=O)[C@H]1CC12CCN(C(C)C)C2)c1ncc(-c2cc3ccccc3nc2OC)[nH]1</chem>                                                                                                                                    | 5664        |
| 1347 | 1647 | <chem>Cc1cccc2sc(NC(=O)COc3ccc4cc(/C=C5/SC(=O)NC5=O)ccc4c3)nc12</chem>                                                                                                                                                      | 5800        |
| 1348 | 1648 | <chem>CC(=O)N[C@@H](Cc1ccc(OCc2ccccc2)cc1)C(=O)NO</chem>                                                                                                                                                                    | 5800        |
| 1349 | 1650 | <chem>C=CCn1c(SCCCCC(=O)Nc2ccccc2N)nn1-c1cnc1</chem>                                                                                                                                                                        | 5860        |
| 1350 | 1651 | <chem>CC[C@H]1OC(=O)[C@H](C)[C@@H](O[C@H]2C[C@@](C)(OC)[C@@H](O)[C@H](C)O2)[C@H](C)[C@@H](O[C@@H]2O[C@H](C)C[C@H](N(C)Cc3ccc(-c4cn(CCCCCC(=O)NO)nn4)cc3)[C@H]2O)[C@](C)(OC)C[C@@H](C)C(=O)[C@H](C)[C@@H](O)[C@]1(C)O</chem> | 5880        |
| 1351 | 1652 | <chem>O=C(CCCCCCOc1cccc(-c2nc3ccccc3[nH]2)c1)NO</chem>                                                                                                                                                                      | 5980        |
| 1352 | 1653 | <chem>CCCCCCCCCCCCCCCCNNC(=O)c1cccs1</chem>                                                                                                                                                                                 | 6000        |
| 1353 | 1655 | <chem>Nc1ccc(F)cc1NC(=O)c1ccc(CNC(=O)OCc2ccnc2)cc1</chem>                                                                                                                                                                   | 6000        |
| 1354 | 1656 | <chem>NCC(=O)Nc1ccccc1-c1ccc(NC(=O)CCCCNC(=O)CS)cc1</chem>                                                                                                                                                                  | 6030        |
| 1355 | 1657 | <chem>Oc1cccn(CCn2cc(-c3ccccc3)nn2)c1=S</chem>                                                                                                                                                                              | 6050        |
| 1356 | 1658 | <chem>CC(C)C[C@H]1CC(=O)N[C@@H](C)C(=O)N[C@@H](CSCC(=O)O)C(=O)N[C@@H](Cc2c[nH]c3ccccc23)C(=O)N1</chem>                                                                                                                      | 6050        |
| 1357 | 1660 | <chem>CCC(=O)CCCC[C@H](NC(=O)[C@H]1CC12CCN(CC(F)(F)F)CC2)c1ncc(-c2cc3ccccc3nc2OC)[nH]1</chem>                                                                                                                               | 6093        |
| 1358 | 1661 | <chem>O=C(CS)NCCCCC(=O)Nc1cccc2ccnc12</chem>                                                                                                                                                                                | 6120        |
| 1359 | 1662 | <chem>Cc1nc2c(c(N(C)c3ccc(OC(=O)NO)cc3)n1)CCC2</chem>                                                                                                                                                                       | 6190        |
| 1360 | 1663 | <chem>CC[C@H](Nc1ncnc2[nH]cnc12)c1nc(NCCCC(=O)NO)c2ccccc2n1</chem>                                                                                                                                                          | 6194        |
| 1361 | 1665 | <chem>O=C(NO)c1ccc(NC2CC(=O)N(c3ccccc3)C2)cc1</chem>                                                                                                                                                                        | 6250        |
| 1362 | 1666 | <chem>CCC(=O)CCCC[C@H](NC(=O)[C@H]1CC12CCN(CC)CC2)c1ncc(-c2ccc3c(=O)n(CC)ccc3c2)[nH]1</chem>                                                                                                                                | 6261        |
| 1363 | 1667 | <chem>CCC(=O)CCCC[C@H](NC(=O)[C@H]1CC12CCN(CC)CC2)c1ncc(-c2cc3ccc(C)nc3cc2OC)[nH]1</chem>                                                                                                                                   | 6300        |
| 1364 | 1668 | <chem>COc1cc(C(=O)c2csc(-c3ccc(NC(=O)CCCC(=O)NO)cc3)n2)cc(OC)c1OC</chem>                                                                                                                                                    | 6320        |
| 1365 | 1670 | <chem>Oc1cccn(CCn2cc(-c3ccccc3)nn2)c1=S</chem>                                                                                                                                                                              | 6400        |
| 1366 | 1671 | <chem>CC(C)OC(=O)Nc1ccc(-c2cc(C(=O)NCCCCC(=O)NO)no2)cc1</chem>                                                                                                                                                              | 6522.630604 |
| 1367 | 1672 | <chem>COc1cc(C(=O)c2csc(-c3ccc(C#CCCC(=O)Nc4ccccc4N)cc3)n2)cc(OC)c1OC</chem>                                                                                                                                                | 6550        |
| 1368 | 1673 | <chem>O=C(NO)c1cccc(Oc2ccccc2)c1</chem>                                                                                                                                                                                     | 6600        |
| 1369 | 1675 | <chem>O=C(N[C@@H](CCCCB(O)O)C(=O)Nc1cccc(-c2ccccc2)c1)c1cncs1</chem>                                                                                                                                                        | 6600        |
| 1370 | 1676 | <chem>CC[C@H]1OC(=O)[C@H](C)[C@@H](O[C@H]2C[C@@](C)(OC)[C@@H](O)[C@H](C)O2)[C@H](C)[C@@H](O[C@@H]2O[C@H](C)C[C@H](N(C)Cc3ccc(NC(=O)CCCCC(=O)NO)cc3)[C@H]2O)[C@](C)(O)C[C@@H](C)CN(C)[C@H](C)[C@@H](O)[C@]1(C)O</chem>       | 6680        |
| 1371 | 1677 | <chem>O=C(O)CCCC[C@@H]1NC(=O)[C@H](Cc2c(F)c(F)c(F)c(F)c2F)NC(=O)C[C@H](Cc2ccc(O)cc2)NC(=O)[C@H](Cc2ccccc23)NC1=O</chem>                                                                                                     | 6700        |
| 1372 | 1678 | <chem>Fe1cccc2e1SC(=S)N1CCN=C21</chem>                                                                                                                                                                                      | 6700        |
| 1373 | 1680 | <chem>Cc1ncc(-c2ccc(C(C(=O)NO)c3ccccc3F)cc2)en1</chem>                                                                                                                                                                      | 6700        |
| 1374 | 1681 | <chem>Cn1cc([C@H]2[C@H](C(=O)NO)[C@@H]2c2ccccc2)cn1</chem>                                                                                                                                                                  | 6700        |
| 1375 | 1682 | <chem>O=C(CCN1CCc2ccccc2C1C1CCCC1)NO</chem>                                                                                                                                                                                 | 6700        |
| 1376 | 1683 | <chem>O=C(CCC1C(=O)N(c2ccc(Cl)cc2)C(=O)N1Cc1ccc(Br)cc1)Nc1ccc(C(=O)NO)cc1</chem>                                                                                                                                            | 6700        |
| 1377 | 1685 | <chem>Cc1ccc(NC(=O)CN(CCCCC(=O)NO)C(=O)c2ccc(N(C)C)cc2</chem>                                                                                                                                                               | 6760        |

|      |      |                                                                                                                                                                                                                                                 |             |
|------|------|-------------------------------------------------------------------------------------------------------------------------------------------------------------------------------------------------------------------------------------------------|-------------|
|      |      | )cc1                                                                                                                                                                                                                                            |             |
| 1378 | 1686 | Oc1cccn(CCCCCn2ccc(-c3ccccc3)nn2)c1=S                                                                                                                                                                                                           | 6770.970462 |
| 1379 | 1687 | CC[C@H]1OC(=O)[C@H](C)[C@@H](O)[C@H](C)[C@@H](O)[C@@H]2O[C@H](C)C[C@H](N(C)Cc3ccc(-c4cn(CCCCCC(=O)NO)nn4)cc3)[C@H]2O)[C@](C)(O)C[C@@H](C)CN(C)[C@H](C)[C@@H](O)[C@]1(C)O                                                                        | 6780        |
| 1380 | 1688 | O=CN(O)CCCCC(=O)Nc1ccccc1                                                                                                                                                                                                                       | 6800        |
| 1381 | 1690 | CCC(=O)CCCC[C@H](NC(=O)[C@H]1CC12CCN(C)CC2)c1[nH]c(-c2ccc(F)cc2)nc1C(N)=O                                                                                                                                                                       | 6802        |
| 1382 | 1691 | Nc1nc(Nc2ccc(F)c(Cl)c2)c2nnc(Cc3ccc(C(=O)Nc4ccccc4N)cc3)c2n1                                                                                                                                                                                    | 6810        |
| 1383 | 1692 | CC(C)(C)OC(=O)Nc1ccc(-c2cc(NC(=O)CCCCC(=O)NO)no2)cc1                                                                                                                                                                                            | 6851        |
| 1384 | 1693 | CCC(=O)CCCC[C@H](NC(=O)C12CCN(CC1)CC2)c1[nH]c(-c2ccc(F)cc2)nc1C#N                                                                                                                                                                               | 6929        |
| 1385 | 1695 | O=CN(O)CCCCCNC(=O)c1ccc2ccccc2c1                                                                                                                                                                                                                | 7000        |
| 1386 | 1696 | CN(C)c1ccc2c(c1)SC(=S)N1CCN=C21                                                                                                                                                                                                                 | 7000        |
| 1387 | 1697 | CC(=O)NCCCC[C@@H]1NC(=O)C[C@H](CC(C)C)NC(=O)[C@H](Cc2c[nH]c3ccccc23)NC(=O)[C@H](CSCC(=O)O)NC1=O                                                                                                                                                 | 7040        |
| 1388 | 1698 | COc1cc(C(=O)c2csc(-c3ccc(O/C=C/c4ccc(CC(=O)NO)cc4)cc3)n2)cc(OC)c1OC                                                                                                                                                                             | 7100        |
| 1389 | 1700 | CC[C@@H]1OC(=O)[C@@H](C)[C@H](O[C@H]2C[C@@](C)(OC)[C@](O)(CN(C)Cc3ccc(-c4cn(CC(=O)NO)nn4)cc3)[C@H](C)O2)[C@H](C)[C@H](O[C@@H]2O[C@H](C)C[C@H](N(C)Cc3ccc(-c4cn(CCCCCC(=O)NO)nn4)cc3)[C@H]2O)[C@](C)(O)C[C@@H](C)CN(C)[C@H](C)[C@@H](O)[C@]1(C)O | 7120        |
| 1390 | 1701 | CC[C@H]1OC(=O)[C@H](C)[C@@H](O[C@H]2C[C@@](C)(OC)[C@H](O)[C@H](C)O2)[C@H](C)[C@H](O[C@@H]2O[C@H](C)C[C@H](N(C)Cc3ccc(-c4cn(CCCCCC(=O)NO)nn4)cc3)[C@H]2O)[C@](C)(O)C[C@@H](C)CN(C)[C@H](C)[C@@H](O)[C@]1(C)O                                     | 7130        |
| 1391 | 1702 | N#Cc1ccc(-c2cn(CCCCCn3ccc(O)c3=S)nn2)cc1C(F)(F)F                                                                                                                                                                                                | 7141.213482 |
| 1392 | 1703 | CCC(=O)CCCC[C@H](NC(=O)[C@H]1CC12CCN(C)CC2)c1nccc(-c2ccc3nc(C)ccc3c2)[nH]1                                                                                                                                                                      | 7200        |
| 1393 | 1705 | Cn1c(SCCCCC(=O)Nc2ccccc2N)nn1-c1ccncc1                                                                                                                                                                                                          | 7280        |
| 1394 | 1706 | CC(C)c1cc(C(=O)N2Cc3ccc(NC(=O)CCC(=O)NO)cc3C2)c(O)cc1O                                                                                                                                                                                          | 7319        |
| 1395 | 1707 | Cc1cc(C)cc(C(=O)N(CCCCC(=O)NO)CC(=O)Nc2ccccc2)c1                                                                                                                                                                                                | 7330        |
| 1396 | 1708 | CC12CC3CC(C)(C1)CC(NS(=O)(=O)c1ccc(/C=C/C(=O)NO)c1)(C3)C2                                                                                                                                                                                       | 7380        |
| 1397 | 1710 | Cc1cc(Br)ccc1NC(=O)COc1ccc2cc(/C=C3/SC(=O)NC3=O)ccc2c1                                                                                                                                                                                          | 7400        |
| 1398 | 1711 | CC(C)c1cc(C(=O)N2Cc3ccc(NC(=O)CCCC(=O)NO)cc3C2)c(O)cc1O                                                                                                                                                                                         | 7415        |
| 1399 | 1712 | C[C@]12CC[C@@H]3c4ccc(O)cc4CC[C@H]3[C@@H]1CC[C@@]2(O)c1cn(CCCCC(=O)NO)nn1                                                                                                                                                                       | 7416.198487 |
| 1400 | 1713 | CCC(=O)CCCCC(NC(=O)c1cnsc1)c1[nH]c(-c2ccccc2)nc1C(=O)NC                                                                                                                                                                                         | 7471        |
| 1401 | 1715 | Cc1cccc(NC(=O)COc2ccc3cc(/C=C4/SC(=O)NC4=O)ccc3c2)n1                                                                                                                                                                                            | 7500        |
| 1402 | 1716 | CCC(=O)CCCC[C@H](NC(=O)C1CCOCC1)c1[nH]c(-c2ccc(F)cc2)nc1C(N)=O                                                                                                                                                                                  | 7566        |
| 1403 | 1717 | Nc1nc2ncc(CNc3ccc(C(=O)NCCCCCCCC(=O)NO)cc3)nc2c(=O)[nH]1                                                                                                                                                                                        | 7590        |
| 1404 | 1718 | CCC(=O)CCCC[C@H](NC(=O)[C@H]1CC12CCN(CC)CC2)c1nccc(-c2cc3ccccc3nc2OC)o1                                                                                                                                                                         | 7600        |
| 1405 | 1720 | O=C(CCCCCc1nc(-c2ccc(F)cc2)no1)C(F)(F)F                                                                                                                                                                                                         | 7650        |

|      |      |                                                                                               |             |
|------|------|-----------------------------------------------------------------------------------------------|-------------|
| 1406 | 1721 | CCCCCCC(=O)N(O)C1CC(=O)C(c2ccc(Cl)cc2)C1=O                                                    | 7690        |
| 1407 | 1722 | Nc1ccc(Cl)cc1NC(=O)c1ccc(CNC(=O)OCc2cccnc2)cc1                                                | 7700        |
| 1408 | 1723 | O=C(NO)c1ccc(-<br>c2ccc3ncnc(Nc4ccc(OCc5ccc(F)c5)e(Cl)c4)c3c2)o1                              | 7700        |
| 1409 | 1725 | Nc1ccccc1NC(=O)c1ccc(CNC(=O)OCc2cccnc2)cc1                                                    | 7763.344198 |
| 1410 | 1726 | COc1ccc2c(c1)C1=NCCN1C(=S)S2                                                                  | 7800        |
| 1411 | 1727 | O=C(NO)c1ccc(CN2C(=O)C(Cc3ccccc3)N(Cc3ccccc3)C2=O)c<br>c1                                     | 7826        |
| 1412 | 1728 | Cn1c(SCc2ccc(C(=O)Nc3ccccc3N)cc2)nnc1-c1ccnc1                                                 | 7850        |
| 1413 | 1730 | COc1cc(C(=O)c2csc(-<br>c3ccc(OCc4ccc(C(=O)NO)cc4)cc3)n2)cc(OC)c1OC                            | 7980        |
| 1414 | 1731 | Nc1ccccc1NC(=O)c1ccc(CNC2=NC(=O)C(c3ccccc3)N2)cc1                                             | 8000        |
| 1415 | 1732 | Cc1coc(C(=O)CCCC[C@H](NC(=O)C2CCN(C)CC2)c2ncc(-<br>c3ccc(F)cc3])[nH]2)n1                      | 8000        |
| 1416 | 1733 | CCCCCCCCSSCC/C=C/[C@@H]1CC(=O)N[C@H](C(C)C)C<br>(=O)N[C@H](C)C(=O)N[C@H](C(C)C)C(=O)NCC(=O)O1 | 8010        |
| 1417 | 1735 | CC(C)(C)OC(=O)Nc1cccc(-<br>c2cc(C(=O)NCCCCCCC(=O)NO)no2)c1                                    | 8104        |
| 1418 | 1736 | O=C(CCCCN1C(=O)[C@@H](CS)N=C(c2ccccc2)c2ccccc21)<br>NO                                        | 8110        |
| 1419 | 1737 | O=C(NO)c1coc(-c2cccs2)n1                                                                      | 8130        |
| 1420 | 1738 | CCC(=O)CCCC[C@H](NC(=O)[C@H]1CC12CCN(Cc1cccc<br>c1)CC2)c1ncc(-c2cc3ccccc3nc2OC)[nH]1          | 8197        |
| 1421 | 1740 | O=C(NO)c1ccc(CNCc2nc(-c3cccs3)no2)cc1                                                         | 8260        |
| 1422 | 1741 | COc1cc(C(=O)c2csc(-<br>c3ccc(NCCC(=O)Nc4ccccc4N)cc3)n2)cc(OC)c1OC                             | 8280        |
| 1423 | 1742 | CCC(=O)CCCC[C@H](NC(=O)[C@H]1CC12CCN(C)CC2)c<br>1ncc(-c2ccc3nc(OC)ccc3c2)[nH]1                | 8300        |
| 1424 | 1743 | O=C(NCC12C[C@H]3C[C@@H](C1)C[C@@H](C2)C3)c1cc<br>c2c(ccn2Cc2ccc(C(=O)NO)c(Br)c2)c1            | 8380        |
| 1425 | 1745 | CC(C)(C)OC(=O)n1c(C[C@@H]2N=C(c3ccccc3)c3ccccc3N(C<br>CCCC(=O)NO)C2=O)cc2ccccc21              | 8390        |
| 1426 | 1746 | CCC(=O)CCCC[C@H]1NC(=O)C2CCN2CCCCCOc2ccc<br>cc2-c2cnc1[nH]2                                   | 8419        |
| 1427 | 1747 | COc1cc(Cn2ccc3cc(C(=O)NCC45C[C@H]6C[C@@H](C4)C[<br>C@@H](C5)C6)ccc32)ccc1C(=O)NO              | 8440        |
| 1428 | 1748 | CN(Cc1ccc(C(=O)NO)cc1[18F])CC12CC3CC(CC(C3)C1)C2                                              | 8500        |
| 1429 | 1750 | O=C(CCCCN1C(=O)[C@H](CCC(=O)NO)N=C(c2ccccc2)c2c<br>cccc21)NO                                  | 8520        |
| 1430 | 1751 | CCC(=O)CCCC[C@H](NC(=O)[C@H]1CC12CCN(C)CC2)c<br>1ncc(-c2cnc3ccccc3c2)[nH]1                    | 8600        |
| 1431 | 1752 | CC12CC3CC(C)(C1)CC(NC1ccc(C(=O)NO)cc1)(C3)C2                                                  | 8630        |
| 1432 | 1753 | O=C(NO)c1ccc(CN2CCCCc3cc(Cl)ccc32)cc1                                                         | 8640        |
| 1433 | 1755 | O=C(CCCCCc1nc(-c2ccc(F)cc2)no1)NO                                                             | 8760        |
| 1434 | 1756 | Cc1ccc(-c2cc(/C=C/c3ccc(C(=O)NO)cc3)cn2)c(F)c1                                                | 8780        |
| 1435 | 1757 | COc1cc(C(=O)c2csc(-<br>c3ccc(OCCCC(=O)NO)cc3)n2)cc(OC)c1OC                                    | 8840        |
| 1436 | 1758 | COc1ccc2sc(NC(=O)CCCCNC(=O)C(O)(O)C(F)(F)F)nc2c1                                              | 8900        |
| 1437 | 1760 | COc1cc2c(Oc3ccc(NC(=O)C4(C(=O)Nc5ccc(F)cc5)CC4)cc3F)<br>cnc2cc1OCCCC(=O)NO                    | 8940        |
| 1438 | 1761 | Cc1ccc(NC(=O)COc2ccc3cc(/C=C4/SC(=O)NC4=O)ccc3c2)cc<br>1                                      | 9000        |
| 1439 | 1762 | Nc1ccccc1NC(=O)c1cncnc1                                                                       | 9012.649444 |
| 1440 | 1763 | COc1ccc(-c2ncc(C(=O)NCCCCCCC(=O)NO)s2)c(OC)c1                                                 | 9020        |
| 1441 | 1765 | O=C(NO)C(c1ccc(-c2ncc(C(F)(F)F)cn2)cc1)c1ccccc1F                                              | 9100        |
| 1442 | 1766 | COc1cc(C(=O)c2csc(-<br>c3ccc(NCC(=O)Nc4ccccc4N)cc3)n2)cc(OC)c1OC                              | 9110        |
| 1443 | 1767 | CCC(=O)CCCC[C@H](NC(=O)[C@H]1CC12CCN(C)CC2)c                                                  | 9200        |

|      |      |                                                                                                                                                                                                                  |             |
|------|------|------------------------------------------------------------------------------------------------------------------------------------------------------------------------------------------------------------------|-------------|
|      |      | 1ncc(-c2ccc(-c3cnccn3)cc2)[nH]1                                                                                                                                                                                  |             |
| 1444 | 1768 | O=C(NO)c1cccc(S(=O)(=O)N[C@H](C(=O)NCc2ccccc2)c2ccc2)c1                                                                                                                                                          | 9200        |
| 1445 | 1770 | O=C(/C=C/c1ccc(/C=C(/CNC2CC2)c2ccc(F)cc2)cc1)NO                                                                                                                                                                  | 9300        |
| 1446 | 1771 | O=C(N[C@@H](Cc1ccc(OCc2ccccc2)cc1)C(=O)NO)c1ccccc1                                                                                                                                                               | 9300        |
| 1447 | 1772 | O=C(CN1C(=O)S/C(=C/c2cccn2)C1=O)Nc1nc2ccccc2s1                                                                                                                                                                   | 9300        |
| 1448 | 1773 | CCC(=O)CCCC[C@H](NC(=O)[C@H]1CC12CCN(CC)CC2)c1[nH]c(-c2ccc(F)cc2)nc1C#N                                                                                                                                          | 9370        |
| 1449 | 1775 | CCC(CC)c1ccc(C(=O)NO)cc1                                                                                                                                                                                         | 9430        |
| 1450 | 1776 | CCN(CC)Cc1ccc(C(=O)NO)cc1                                                                                                                                                                                        | 9430        |
| 1451 | 1777 | S=C1Oe2ccccc2C2=NCCCN12                                                                                                                                                                                          | 9500        |
| 1452 | 1778 | Nc1ccccc1NC(=O)c1ccc(CSC2=N[C@@H](c3ccccc3)CO2)cc1                                                                                                                                                               | 9500        |
| 1453 | 1780 | CC(C)[C@@H]1NC(=O)[C@]2(C)CSC(=N2)c2csc(n2)CNC(=O)C[C@@H]/(C=C/CCSCCS)OC1=O                                                                                                                                      | 9600        |
| 1454 | 1781 | COc1cc(Nc2nc(N)nc3c2nnc3Cc2ccc(C(=O)Nc3ccccc3N)cc2)cc(OC)c1                                                                                                                                                      | 9610        |
| 1455 | 1782 | Cn1cc(C(=O)Cl)cc1/C=C/C(=O)NO                                                                                                                                                                                    | 9650        |
| 1456 | 1783 | O=CN(O)CCCCNC(=O)CCc1ccccc1                                                                                                                                                                                      | 9700        |
| 1457 | 1785 | CC(C)C[C@H]1CC(=O)N[C@H](C)C(=O)N[C@@H](CSCC(=O)O)C(=O)N[C@@H](Cc2c[nH]c3ccccc23)C(=O)N1                                                                                                                         | 9700        |
| 1458 | 1786 | CCC(=O)CCCC[C@H](NC(=O)[C@H]1CC12CCN(C)CC2)c1ncc(C2=CC3OC=NC3C=C2)[nH]1                                                                                                                                          | 9700        |
| 1459 | 1787 | O=C(CCCCCONC(=O)c1ccc2ccccc2n1)NO                                                                                                                                                                                | 9780        |
| 1460 | 1788 | CN1c2ccc(F)cc2C(=O)N2CCc3c([nH]c4ccc(OCc5ccc(/C=C/C(=O)NO)cc5)cc34)C21                                                                                                                                           | 9800        |
| 1461 | 1790 | O=C(CCCCCNC(=O)C(O)(O)C(F)(F)F)Nc1ncc(-c2ccc(Br)cc2)s1                                                                                                                                                           | 10000       |
| 1462 | 1791 | Nc1nc2ncc(CNc3ccc(C(=O)N[C@@H](CCC(=O)NCCCCCCC(C(=O)Nc4cc(-c5cccs5)ccc4N)C(=O)O)cc3)nc2c(=O)[nH]1                                                                                                                | 10000       |
| 1463 | 1792 | CCC(=O)CCCC[C@H](NC(=O)[C@H]1CC12CCN(C)CC2)c1ncc(-c2ccc(-c3cnccn3)cc2)[nH]1                                                                                                                                      | 10000       |
| 1464 | 1793 | O=C(CCCCNc1ccccc1)NO                                                                                                                                                                                             | 10000       |
| 1465 | 1795 | COc1ccc(C(=O)c2ccc3c(ccn3S(=O)(=O)c3ccc(/C=C/C(=O)NO)cc3)c2)cc1                                                                                                                                                  | 10000       |
| 1466 | 1796 | O=C(NO)c1coe(-c2ccccc(-c3ccccc3)c2)n1                                                                                                                                                                            | 10080       |
| 1467 | 1797 | COc1ccc(C(=O)c2csc(-c3ccc(NC(=O)CCCCCCC(=O)Nc4ccccc4N)cc3)n2)cc(OC)c1O                                                                                                                                           | 10160       |
| 1468 | 1798 | COc1ccccc1-c1ncc(C(=O)NCCCCCCC(=O)NO)s1                                                                                                                                                                          | 10190       |
| 1469 | 1800 | CN(C)c1ccc(C(=O)NCCCCNC(=O)CS)cc1                                                                                                                                                                                | 10200       |
| 1470 | 1801 | O=C(CCCCCONC(=O)c1cc2ccccc2[nH]1)NO                                                                                                                                                                              | 10300       |
| 1471 | 1802 | Cn1c(CCC(=O)NO)nc2ccccc2c1=O                                                                                                                                                                                     | 10400       |
| 1472 | 1803 | CC[C@H]1OC(=O)[C@H](C)[C@@H](O[C@H]2C[C@@](C)(OC)[C@@H](O)[C@H](C)O2)[C@H](C)[C@@H](O[C@@H]2O[C@H](C)C[C@H](N(C)Cc3ccc(-c4cn(CCCCCCCC(=O)NO)nn4)cc3)[C@H]2O)[C@](C)(OC)C[C@@H](C)C(=O)[C@H](C)[C@@H](O)[C@]1(C)O | 10550       |
| 1473 | 1805 | CCCNc1ccc(C(=O)Nc2ccc(OC)cc2)cn1                                                                                                                                                                                 | 10744       |
| 1474 | 2071 | O=C(CCCCCOclno[n+](O-)]c1S(=O)(=O)c1ccccc1)NO                                                                                                                                                                    | 10846.61237 |
| 1475 | 1806 | O=C(/C=C/c1ccc(-c2ccc3nenc(Nc4ccc(OCc5ccccc(F)c5)c(Cl)c4)c3c2)o1)NO                                                                                                                                              | 11000       |
| 1476 | 1807 | C[C@]12CC[C@@H]3c4ccc(O)cc4CC[C@H]3[C@@H]1CC[C@@]2(O)c1cn(CCCC(=O)NO)nn1                                                                                                                                         | 11000       |
| 1477 | 1808 | CC(C)(C)OC(=O)CC(O)/C=C/CCSSC/C=C/C(O)CC(=O)OC(C)C                                                                                                                                                               | 11000       |
| 1478 | 1810 | CC[C@H]1OC(=O)[C@H](C)[C@@H](O[C@H]2C[C@@](C)(OC)[C@@H](O)[C@H](C)O2)[C@H](C)[C@@H](O[C@@H]2O[C@H](C)C[C@H](N(C)Cc3ccc(-c4cn(CCCCCCCC(=O)NO)nn4)cc3)[C@H]2O)[C@](C)(O)C                                          | 11050       |

|      |      |                                                                                                |       |
|------|------|------------------------------------------------------------------------------------------------|-------|
|      |      | <chem>[C@@H](C)CN(C)[C@H](C)[C@@H](O)[C@]1(C)O</chem>                                          |       |
| 1479 | 1811 | <chem>O=C(O)CCCCSc1nnc(-c2ccncc2)n1-c1cccc1</chem>                                             | 11050 |
| 1480 | 1812 | <chem>C=CCn1c(SCCCCC(=O)NO)nnc1-c1ccncc1</chem>                                                | 11060 |
| 1481 | 1813 | <chem>O=C(CCCCCONC(=O)Nc1cnc2ccccc2c1)NO</chem>                                                | 11170 |
| 1482 | 1815 | <chem>N[C@@H](Cc1c[nH]c2ccccc12)C(=O)Nc1cccc1-c1ccc(NC(=O)CCCCNC(=O)CS)cc1</chem>              | 11300 |
| 1483 | 1816 | <chem>COc1ccc(-c2ncc(/C=C/C(=O)Nc3ccccc3N)s2)cc1OC</chem>                                      | 11550 |
| 1484 | 1817 | <chem>O=C(Cc1cccc1)NO</chem>                                                                   | 11620 |
| 1485 | 1818 | <chem>COc1cc(C(=O)c2csc(-c3ccc(NC(=O)CCCC(=O)Nc4ccccc4N)cc3)n2)cc(OC)c1OC</chem>               | 11620 |
| 1486 | 1820 | <chem>Cn1c(SCCCCC(=O)O)nnc1-c1ccncc1</chem>                                                    | 11950 |
| 1487 | 1821 | <chem>O=C(CCCCCC(=O)Nc1cccc(-c2cn(-c3ccc(F)cc3)nn2)c1)NO</chem>                                | 12000 |
| 1488 | 1822 | <chem>COc1ccc2c(c1)SC(=S)N1CCN=C21</chem>                                                      | 12000 |
| 1489 | 1823 | <chem>COc1cc(C(=O)c2csc(-c3ccc(NC(=O)CC(=O)Nc4ccccc4N)cc3)n2)cc(OC)c1OC</chem>                 | 12020 |
| 1490 | 1825 | <chem>Cn1cc(C=O)cc1/C=C/C(=O)NO</chem>                                                         | 12250 |
| 1491 | 1826 | <chem>CCC(=O)CCCC[C@H](NC(=O)c1cnsc1)c1[nH]c(-c2ccc(F)cc2)nc1C#N</chem>                        | 12260 |
| 1492 | 1827 | <chem>CN(C)c1ccc(C(=O)NCCNC(=O)CS)cc1</chem>                                                   | 12300 |
| 1493 | 1828 | <chem>O=C(CCCCCONC(=O)c1cccc2ccccc12)NO</chem>                                                 | 12400 |
| 1494 | 1830 | <chem>Nc1cccc1NC(=O)c1ccc(CNC2=N[C@@H](c3ccccc3)[C@H](c3ccccc3)S2)cc1</chem>                   | 12600 |
| 1495 | 1831 | <chem>C#Cc1ccncc1</chem>                                                                       | 12600 |
| 1496 | 1832 | <chem>CCC(=O)CCCC[C@H](NC(=O)[C@H]1CC12CCN(C)CC2)c1[nH]c(-c2ccc(-c3ccncc3)cc2)nc1C#N</chem>    | 12620 |
| 1497 | 1833 | <chem>O=C(CCCCN1C(=O)[C@H](Cc2ccccc2)N=C(c2ccccc2)c2ccccc21)NO</chem>                          | 12670 |
| 1498 | 1835 | <chem>CN(C)S(=O)(=O)c1ccc(NCCCCC(=O)NO)c2nonc12</chem>                                         | 12700 |
| 1499 | 1836 | <chem>O=C(NO)c1ccc(CSe2nnc(-c3ccncc3)n2-c2ccccc2)cc1</chem>                                    | 12760 |
| 1500 | 1837 | <chem>O=C(NO)c1csc(C(c2ccccc2)c2ccccc2)n1</chem>                                               | 12860 |
| 1501 | 1838 | <chem>Fc1cccc2c1C1=NCCN1C(=S)S2</chem>                                                         | 13000 |
| 1502 | 1840 | <chem>COc1ccc(-c2ncc(NC(=O)CCCCCNC(=O)C(O)(O)C(F)(F)F)s2)cc1</chem>                            | 13000 |
| 1503 | 1841 | <chem>Nc1cccc1NC(=O)c1ccc(CNC2=NC(=O)C(Cc3ccccc3)N2)cc1</chem>                                 | 13000 |
| 1504 | 1842 | <chem>N/N=C(\Cc1ccc(O)c(Br)c1)C(=O)NCCS</chem>                                                 | 13000 |
| 1505 | 1843 | <chem>Cc1ccc2c(c1)SC(=S)N1CCN=C21</chem>                                                       | 13000 |
| 1506 | 1845 | <chem>O=C(N[C@@H](CCCCNC(=O)c1cccc1O)c1ncc(-c2ccc3ccccc3c2)[nH]1)c1cnsc1</chem>                | 13000 |
| 1507 | 2072 | <chem>O=C(CN1C(=O)S/C(=C/c2ccco2)C1=O)Nc1ccc([N+](=O)[O-])cc1</chem>                           | 13000 |
| 1508 | 1846 | <chem>COc1ccc(-c2ncc(/C=C/C(=O)Nc3ccccc3N)s2)c1</chem>                                         | 13370 |
| 1509 | 1847 | <chem>O=C(CS)NCCCCCNC(=O)Nc1cccc1</chem>                                                       | 13900 |
| 1510 | 1848 | <chem>CNC(=O)c1ccc(C(=O)NO)c1</chem>                                                           | 14000 |
| 1511 | 1850 | <chem>CCC(=O)CCCC[C@H](NC(=O)[C@H]1CC12CCN(CCC(F)(F)F)CC2)c1ncc(-c2cc3ccccc3nc2OC)[nH]1</chem> | 14090 |
| 1512 | 1851 | <chem>O=C(/C=C/c1ccc(Cn2cc(Nc3ncc(Cl)c(Nc4ccc(F)cc4)n3)cn2)cc1)NO</chem>                       | 14100 |
| 1513 | 1852 | <chem>COc1cc(-c2ncc(/C=C/C(=O)Nc3ccccc3N)s2)cc(OC)c1OC</chem>                                  | 14180 |
| 1514 | 1853 | <chem>Nc1cccc1NC(=O)c1ccc(CSC2=N[C@@H](c3ccccc3)CN2)cc1</chem>                                 | 14300 |
| 1515 | 1855 | <chem>O=C(NO)c1coc(-c2ccc(Br)cc2)n1</chem>                                                     | 14370 |
| 1516 | 1856 | <chem>CC(=O)N[C@@H](Cc1ccc(OCCc2ccccc2)cc1)C(=O)NO</chem>                                      | 14400 |
| 1517 | 1857 | <chem>COc1ccc(-c2ncc(C(=O)NCCCCC(=O)NO)[nH]2)c(OC)c1</chem>                                    | 14560 |
| 1518 | 1858 | <chem>O=C(NO)c1ccc(CN(Cc2nmmn2Cc2ccccc2)C(=O)c2ccccc2C(F)(F)F)cc1</chem>                       | 14700 |
| 1519 | 1860 | <chem>Nc1cccc1NC(=O)c1ccc(CNC2=N[C@@H](c3ccc(O)cc3)CS2)cc1</chem>                              | 15000 |
| 1520 | 1861 | <chem>CCCC(=O)O</chem>                                                                         | 15000 |
| 1521 | 1862 | <chem>COc1cccc(-c2ncc(C(=O)NCCCCC(=O)NO)s2)c1</chem>                                           | 15230 |

|      |      |                                                                               |             |
|------|------|-------------------------------------------------------------------------------|-------------|
| 1522 | 1863 | O=C(NO)C1c2ccccc2-c2ccccc21                                                   | 15247.95068 |
| 1523 | 1865 | O=C1Nc2ccccc2/C1=N/NC(=S)Nc1ccc(C(=O)NO)cc1                                   | 15700       |
| 1524 | 1866 | CCSC(=S)SCC(=O)c1ccc(OC)cc1                                                   | 15848.93    |
| 1525 | 1867 | CCC(=O)CCCC[C@H](NC(=O)[C@H]1CC12CCN(CC)CC2)c1ncc(-c2cc3ccccc3nc2OC)o1        | 16000       |
| 1526 | 1868 | O=C(COc1ccc2cc(/C=C3/SC(=O)NC3=O)ccc2c1)Nc1ccc(Br)cc1                         | 16000       |
| 1527 | 1870 | O=C1NC(=O)/C(=C\c2ccc(OCC(=O)N3N=C(c4ccccc4)CC3c3ccc(C(F)(F)F)cc3)cc2)S1      | 16000       |
| 1528 | 1871 | CCC(=O)CCCC[C@H](NC(=O)c1cccn1)c1[nH]c(-c2ccc(F)cc2)nc1C#N                    | 16190       |
| 1529 | 1872 | COc1ccc2c(C(=O)c3cc(OC)c(OC)c3)cn(S(=O)(=O)c3ccc(/C=C/C(=O)NO)c3)c2c1         | 16200       |
| 1530 | 1873 | COc1ccc(CNC(=O)c2cc(F)ccc2N2CCOCC2)cc1OCC(=O)NO                               | 16509       |
| 1531 | 1875 | CCC(=O)CCCC[C@H](NC(=O)[C@H]1CC12CCN(C)CC2)c1[nH]c(-c2ccc(F)cc2)nc1C#N        | 16750       |
| 1532 | 1876 | CCC(=O)CCCCC(NC(=O)c1ncs1)c1[nH]c(-c2ccccc2)nc1C(=O)N1CCOCC1                  | 16780       |
| 1533 | 1877 | CCC(=O)CCCC[C@H](NC(=O)[C@H]1CC12CCN(C)CC2)c1ncc(-c2cc3ccccc3cc2OC)o1         | 17000       |
| 1534 | 1878 | CCOc1ccc2nc(NC(=O)COc3ccc4cc(/C=C5/SC(=O)NC5=O)ccc4c3)se2c1                   | 17000       |
| 1535 | 1880 | O=C(/C=C/c1ccc(-c2ccc3nnc(Nc4ccc(OCc5ccc(F)c5)c(Cl)c4)c3c2)s1)NO              | 19000       |
| 1536 | 1881 | O=C(CCN1CCc2ccccc2C1)NO                                                       | 19000       |
| 1537 | 1882 | O=C(CN1CCc2ccccc2C1c1ccccc1)NO                                                | 19000       |
| 1538 | 1883 | O=C(NO)c1ccc(S(=O)(=O)N[C@@H](Cc2c[nH]c3ccccc23)C(=O)NCc2ccccc2)c1            | 19000       |
| 1539 | 1885 | CCC(=O)CCCC[C@H](NC(=O)[C@H]1CC12CCN(C)CC2)c1[nH]c(-c2ccc(C(F)(F)F)cc2)nc1C#N | 19190       |
| 1540 | 1886 | CCC(=O)CCCC[C@H](NC(=O)C1CN(C)C1)c1[nH]c(-c2ccc(F)cc2)nc1C#N                  | 19650       |
| 1541 | 1887 | O=C(NO)c1ccc(NC(=S)N/N=C/c2ccc(F)cc2)cc1                                      | 19700       |
| 1542 | 1888 | COc1ccc(-c2ncc(C(=O)NCCCCC(=O)NO)s2)c(OC)c1                                   | 19810       |
| 1543 | 1890 | O=C(NO)c1ccc(-c2ccccc2)c1                                                     | 20000       |
| 1544 | 1891 | Nc1ccc(-c2cccs2)cc1NC(=O)c1ccc(N2CCC3(CC2)CNC(=O)O3)nc1                       | 20000       |
| 1545 | 1892 | CCC(=O)CCCC[C@H](NC(=O)[C@H]1CC12CCN(C)CC2)c1ncc(-c2cc3ccc(C)nc3cc2OC)o1      | 20000       |
| 1546 | 1893 | O=C1NC(=O)/C(=C\c2ccc(OCC(=O)N3N=C(c4ccccc4)CC3c3ccccc3)cc2)S1                | 20000       |
| 1547 | 1895 | O=C(NO)c1coc(-c2ccccc2Br)n1                                                   | 20240       |
| 1548 | 1896 | CSCC[C@@H]1N=C(c2ccccc2)c2ccccc2N(CCCCC(=O)NO)C1=O                            | 20280       |
| 1549 | 1897 | CCC(=O)CCCC[C@H](NC(=O)[C@H]1CC12CCN(C)CC2)c1[nH]c(-c2ccc(F)cc2F)nc1C#N       | 20730       |
| 1550 | 1898 | CN1CCN(CCNC(=O)c2ccc(C(=O)NO)cc2)CC1                                          | 20910       |
| 1551 | 1900 | S=C1Sc2ccccc2C2=NCCN12                                                        | 21000       |
| 1552 | 1901 | Fc1ccc2c1SC(=S)N1CCCN=C21                                                     | 21000       |
| 1553 | 1902 | CCC(=O)CCCC[C@H]1NC(=O)C2CCN2CCCCOe2ccccc2-c2enc1[nH]2                        | 21460       |
| 1554 | 1903 | CCC(=O)CCCC[C@H](NC(=O)[C@H]1CC12CCN(C)CC2)c1ncc(-c2cc3ccccc3nc2OC)o1         | 21690       |
| 1555 | 1905 | Cc1[nH]c2ccccc2c1CCNc1ccc(/C=C/C(N)=O)cc1                                     | 22000       |
| 1556 | 1906 | O=CN(O)CCCCNC(=O)c1ccccc1                                                     | 22000       |
| 1557 | 1907 | CNC(=O)/C(CCCCCC(=O)Nc1ccccc1)=N\O                                            | 22297.98197 |
| 1558 | 1908 | CC(C)(C)OC(=O)C[C@@H]1N=C(c2ccccc2)c2ccccc2N(CCC(C(=O)NO)C1=O                 | 22390       |

|      |      |                                                                                                                   |             |
|------|------|-------------------------------------------------------------------------------------------------------------------|-------------|
| 1559 | 1910 | <chem>C=CCn1c(SCc2ccc(C(=O)Nc3ccccc3N)cc2)nnc1-c1ccccc1</chem>                                                    | 22490       |
| 1560 | 1911 | <chem>CC(=O)N1C(NCc2ccc(C(=O)Nc3ccccc3N)cc2)=NC(=O)C1Cc1ccccc1</chem>                                             | 22700       |
| 1561 | 1912 | <chem>O=C(O)CC/C=C\C[C@@H]1NC(=O)[C@H]2CCCN2C(=O)[C@H](Cc2ccccc2)NC(=O)[C@H](Cc2c[nH]c3ccccc23)NC1=O</chem>       | 23000       |
| 1562 | 1913 | <chem>O=C(N[C@@H](CCCCCB(O)O)C(=O)Nc1cccc(-c2ccccc2)c1)c1ccccc1</chem>                                            | 23000       |
| 1563 | 1915 | <chem>O=C(CCCCN1C(=O)[C@H](CCC(=O)NC(c2ccccc2)(c2ccccc2)c2ccccc2)N=C(c2ccccc2)c2ccccc21)NO</chem>                 | 23480       |
| 1564 | 1916 | <chem>CC(=O)Nc1ccc(C(=O)CSc2nc(C)cc(O)n2)cc1</chem>                                                               | 23900       |
| 1565 | 1917 | <chem>CCC(=O)CCCC[C@H](NC(=O)[C@H]1CC12CCN(C)CC2)c1ncc(-c2cc3ccc(C4CC4)nc3cc2F)o1</chem>                          | 24000       |
| 1566 | 1918 | <chem>CCC(=O)CCCC[C@H](NC(=O)[C@H]1CC12CCN(CC)CC2)c1ncc(-c2cc3ccccc3nc2OC)o1</chem>                               | 24000       |
| 1567 | 1920 | <chem>CC(=O)N1C(NCc2ccc(C(=O)Nc3ccccc3N)cc2)=NC(=O)C1Cc1c[nH]c2ccccc12</chem>                                     | 24300       |
| 1568 | 1921 | <chem>C[C@@H]1N=C(c2ccccc2)c2ccccc2N(CCCCC(=O)NO)C1=O</chem>                                                      | 24750       |
| 1569 | 1922 | <chem>O=C1NC(=O)/C=C\c2ccc(OCC(=O)N3N=C(c4ccc(F)cc4)CC3c3ccc(Cl)c(Cl)c3)cc2)S1</chem>                             | 25000       |
| 1570 | 1923 | <chem>Nc1ccccc1NC(=O)c1ccc(CNC2=N[C@H](c3ccccc3)[C@H](c3ccccc3)O2)cc1</chem>                                      | 25200       |
| 1571 | 1925 | <chem>O=C1NC(=O)/C=C\c2ccc(OCC(=O)N3N=C(c4ccccc4)CC3c3ccc(F)cc3)cc2)S1</chem>                                     | 26000       |
| 1572 | 1926 | <chem>CC(C)(C)OC(=O)CC[C@@H]1N=C(c2ccccc2)c2ccccc2N(CC(CCC(=O)NO)C1=O</chem>                                      | 26070       |
| 1573 | 1927 | <chem>O=C(NO)c1coc(-c2ccc3ccccc3c2)n1</chem>                                                                      | 26160       |
| 1574 | 1928 | <chem>O=C(CCCCN1cc(-c2ccc(C(=O)c3c(-c4ccc(O)cc4)sc4cc(O)ccc34)cc2)nn1)NO</chem>                                   | 26507.5461  |
| 1575 | 1930 | <chem>C[Si](O)(O)CCCCCCC(=O)Nc1ccccc1</chem>                                                                      | 27000       |
| 1576 | 1931 | <chem>CC(C)(C)OC(=O)N1C(NCc2ccc(C(=O)Nc3ccccc3N)cc2)=NC(=O)C1Cc1c[nH]c2ccccc12</chem>                             | 27200       |
| 1577 | 1932 | <chem>O=C(NO)c1coc(-c2ccc(-c3ccccc3)cc2)n1</chem>                                                                 | 27330       |
| 1578 | 1933 | <chem>O=C(CCCCC[C@@H]1NC(=O)[C@H](Cc2c[nH]c3ccccc23)NC(=O)[C@H]2CCCN2C(=O)[C@H](Cc2c[nH]c3ccccc23)NC1=O)NO</chem> | 27600       |
| 1579 | 1935 | <chem>O=C(N[C@@H](Cc1ccc(OCCc2ccccc2)cc1)C(=O)NO)c1ccccc1</chem>                                                  | 27800       |
| 1580 | 1936 | <chem>O=C(CS)NCCCCC(=O)Nc1ccccc1</chem>                                                                           | 27892.65136 |
| 1581 | 1937 | <chem>COc1ccc2cc(C(=O)/C=C/C=C/c3ccc(OC)c(OC)c3)c(=O)oc2c1</chem>                                                 | 28000       |
| 1582 | 2073 | <chem>COc1ccc(COc2ccc(NC(=O)CCCCCCC(=O)OCc3ccc(CN=[N+]=[N-])cc3)cc2)cc(N=[N+]=[N-])c1</chem>                      | 28000       |
| 1583 | 1938 | <chem>C=CCn1c(SCc2ccc(C(=O)NO)cc2)nnc1-c1ccccc1</chem>                                                            | 28370       |
| 1584 | 1940 | <chem>COc1ccc2cc(-c3nc(C(=O)NO)co3)ccc2c1</chem>                                                                  | 29080       |
| 1585 | 1941 | <chem>CNC(=O)/C(CCCCCC(=O)Nc1cccc(-c2ccc(C(=O)O)cc2)c1)=N\O</chem>                                                | 29400       |
| 1586 | 1942 | <chem>CCC(=O)CCCC[C@H](NC(=O)CN(C)C)c1[nH]c(-c2ccc(F)cc2)nc1C#N</chem>                                            | 29490       |
| 1587 | 1943 | <chem>C[C@@H](OCc1ccccc1)[C@@H]1N=C(c2ccccc2)c2ccccc2N(CCCCC(=O)NO)C1=O</chem>                                    | 29540       |
| 1588 | 1945 | <chem>O=C(CCCCN1cc(-c2ccc(C(=O)c3c(-c4ccc(O)cc4)sc4cc(O)ccc34)cc2)nn1)NO</chem>                                   | 29900       |
| 1589 | 1946 | <chem>CCCC[C@H]1NC(=O)C[C@H]2/C=C/CCSSC[C@@H](NC1=O)C(=O)N[C@H]([C@@H](C)CC)[C@H](O)CC(=O)O2</chem>               | 30000       |
| 1590 | 1947 | <chem>O=C(CCCCCNC(=O)C(O)(O)C(F)(F)F)Nc1ncc(-c2ccc(O)cc2)s1</chem>                                                | 30000       |
| 1591 | 1948 | <chem>S=C1Sc2c(Cl)cccc2C2=NCCCN12</chem>                                                                          | 30000       |
| 1592 | 1950 | <chem>Cc1ccc(C(=O)N[C@@H](Cc2ccc(OCc3ccccc3)cc2)C(=O)NO)cc1</chem>                                                | 30700       |
| 1593 | 1951 | <chem>O=C(NO)c1coc(-c2ccc(Cl)cc2)n1</chem>                                                                        | 30760       |

|      |      |                                                                                              |             |
|------|------|----------------------------------------------------------------------------------------------|-------------|
| 1594 | 1952 | <chem>O=C(/C=C/c1ccc(-c2ccc3nenc(Nc4ccc(OCc5ccc(F)c5)c(Cl)c4)c3c2)cc1)NO</chem>              | 31000       |
| 1595 | 1953 | <chem>Cc1cccc2c1SC(=S)N1CCN=C21</chem>                                                       | 31000       |
| 1596 | 1955 | <chem>Nc1cccc1NC(=O)/C=C/c1ccc(NC(=O)Cc2ccccc2)cn1</chem>                                    | 31400       |
| 1597 | 1956 | <chem>Nc1ccc(-c2cccs2)cc1NC(=O)c1ccc(CNC(=O)OCc2ccccc2)cc1</chem>                            | 31738       |
| 1598 | 1957 | <chem>CCC(=O)CCCC[C@H](NC(=O)[C@H]1CC12CCN(C(C)C)C2)c1ncc(-c2cc3ccccc3nc2OC)o1</chem>        | 32920       |
| 1599 | 1958 | <chem>O=C(NO)N1CCN(C(=S)N/N=C/c2ccccc2O)CC1</chem>                                           | 33670       |
| 1600 | 1960 | <chem>Nc1cccc1NC(=O)c1ccc(CNC2=NC(c3ccc(F)cc3)CO2)cc1</chem>                                 | 33900       |
| 1601 | 1961 | <chem>CC(C)[C@H](NS(=O)(=O)c1cccc(C(=O)NO)c1)C(=O)Nc1ccc1</chem>                             | 33900       |
| 1602 | 1962 | <chem>CC(C)Cc1nc2cc(CCC(=O)NO)ccc2n1CCCO</chem>                                              | 33960       |
| 1603 | 1963 | <chem>O=C1NC(=O)/C(=C\c2ccc(OCC(=O)N3N=C(c4ccccc4)CC3c3ccc(F)cc3F)cc2)S1</chem>              | 34000       |
| 1604 | 1965 | <chem>Nc1cccc1NC(=O)c1ccc(CNc2cccc(-c3ccccc3)n2)cc1</chem>                                   | 35000       |
| 1605 | 1966 | <chem>O=C1NC(=O)/C(=C\c2ccc(OCC(=O)N3N=C(c4ccccc4)CC3c3ccc(Br)cc3)cc2)S1</chem>              | 35000       |
| 1606 | 1967 | <chem>CCC(C(=O)Nc1ccc(/C=C/C(=O)Nc2ccccc2N)nc1)c1cccc1</chem>                                | 35600       |
| 1607 | 2074 | <chem>COC(=O)CCCCCCC(=O)Nc1cnc(Cc2cc(CN=[N+]=[N-])cc(N=[N+]=[N-])c2)c1</chem>                | 36000       |
| 1608 | 1968 | <chem>O=C(NO)c1csc(-c2ccc(Br)cc2)n1</chem>                                                   | 36360       |
| 1609 | 1970 | <chem>CCOP(=O)(CNCc1ccc(C(=O)Nc2cc(-c3cccs3)ccc2N)cc1)OCC</chem>                             | 37000       |
| 1610 | 1971 | <chem>CCC(=O)CCCC[C@H](NC(=O)[C@H]1CC12CCN(C)CC2)c1[nH]c(-c2ccccc2OC)nc1C#N</chem>           | 38080       |
| 1611 | 1972 | <chem>O=C(NO)c1noc(-c2ccccc2)n1</chem>                                                       | 38500       |
| 1612 | 1973 | <chem>CCC(=O)CCCC[C@H](NC(=O)[C@H]1CC12CCN(CC)CC2)c1ncc(-c2cc3ccc(C)nc3cc2OC)o1</chem>       | 39000       |
| 1613 | 1975 | <chem>CCC(=O)CCCC[C@H](NC(=O)[C@H]1CC12CCN(C)CC2)c1[nH]c(-c2ccccc2F)nc1C#N</chem>            | 39610       |
| 1614 | 1976 | <chem>Nc1cc(Cl)ccc1NC(=O)c1ccc(CNC(=O)OCc2ccccc2)cc1</chem>                                  | 40000       |
| 1615 | 1977 | <chem>O=C(NO)c1coc(-c2ccccc2)n1</chem>                                                       | 41900       |
| 1616 | 1978 | <chem>Ic1ccccn1</chem>                                                                       | 42000       |
| 1617 | 2076 | <chem>CC(C)(C)OC(=O)CCCCCCC(=O)Nc1ccc(OCc2cc(CN=[N+]=[N-])cc(N=[N+]=[N-])c2)cc1</chem>       | 42600       |
| 1618 | 1980 | <chem>CC(C)C(C(=O)Nc1ccc(/C=C/C(=O)Nc2ccccc2N)nc1)c1cccc1</chem>                             | 43100       |
| 1619 | 1981 | <chem>O=C(NO)N1CCN(C(=S)N/N=C/c2ccc(Cl)cc2)CC1</chem>                                        | 43160       |
| 1620 | 1982 | <chem>O=C(NO)c1coc(-c2ccc(F)cc2)n1</chem>                                                    | 43350       |
| 1621 | 1983 | <chem>CC(C)(C)OC(=O)N[C@@H](CCCCS)C(=O)NC1CCCC1</chem>                                       | 44000       |
| 1622 | 1985 | <chem>CCC(=O)CCCC[C@H](NC(=O)[C@H]1CC12CCN(C)CC2)c1nnc(-c2cc3ccccc3nc2OC)o1</chem>           | 45000       |
| 1623 | 2077 | <chem>COC(=O)CCCCCNC(=O)c1cc(-c2ccc(NC(=O)c3cc(CN=[N+]=[N-])cc(N=[N+]=[N-])c3)cc2)on1</chem> | 47100       |
| 1624 | 1986 | <chem>CS(=O)(=O)N[C@@H](Cc1ccc(OCc2ccccc2)cc1)C(=O)O</chem>                                  | 47200       |
| 1625 | 1987 | <chem>COC(=O)CCCCCCC(=O)Nc1ccc(OCc2cc(C)cc(C)c2)cc1</chem>                                   | 47800       |
| 1626 | 1988 | <chem>COc1ccc(-c2nc(C(=O)NO)co2)cc1</chem>                                                   | 50940       |
| 1627 | 1990 | <chem>O=C(CCCCCCNC(=O)C(O)(O)C(F)(F)F)Nc1ccc(Cl)cc1</chem>                                   | 52000       |
| 1628 | 1991 | <chem>Nc1cccc1NC(=O)c1ccc(CNC2=NC(c3ccccc3)CO2)cc1</chem>                                    | 52200       |
| 1629 | 1992 | <chem>Cc1ccc(C(=O)N[C@@H](Cc2ccc(OCc3ccccc3)cc2)C(=O)NO)cc1</chem>                           | 52500       |
| 1630 | 1993 | <chem>Cn1cc(C=O)cc1CCC(=O)NO</chem>                                                          | 52560       |
| 1631 | 1995 | <chem>Nc1cccc1NC(=O)c1ccc(CNC2=NC(c3ccccc3)(c3ccccc3)CO2)cc1</chem>                          | 53500       |
| 1632 | 1996 | <chem>O=C(NO)C(c1cccc1)c1cccc1</chem>                                                        | 53881.81422 |
| 1633 | 1997 | <chem>CNC(=O)/C(CCCCCC(=O)NC1c2ccccc2-c2ccccc21)=N\O</chem>                                  | 58400       |
| 1634 | 1998 | <chem>O=C(NO)c1csc(-c2cncn2)n1</chem>                                                        | 61420       |
| 1635 | 2000 | <chem>CNC(=O)/C(CCCCCC(=O)Nc1ccc2ccccc2c1)=N\O</chem>                                        | 65000       |
| 1636 | 2001 | <chem>CCC(C(=O)Nc1ccc(C(=O)Nc2ccccc2N)nc1)c1cccc1</chem>                                     | 66200       |

|      |      |                                                                                   |        |
|------|------|-----------------------------------------------------------------------------------|--------|
| 1637 | 2078 | <chem>COc1cc(COc2ccc(NC(=O)CCCCCCC(=O)OCCN=[N+]=[N-])cc2)cc(N=[N+]=[N-])c1</chem> | 67500  |
| 1638 | 2002 | <chem>Nc1ccccc1NC(=O)CCCCC(c1c[nH]c2ccccc12)c1c[nH]c2ccccc12</chem>               | 74000  |
| 1639 | 2003 | <chem>CC(C)C(C(=O)Nc1ccc(C(=O)Nc2ccccc2N)nc1)c1ccccc1</chem>                      | 75200  |
| 1640 | 2005 | <chem>CNC(=O)/C(CCCCCC(=O)Nc1ccccc1-c2ccccc2)c1=N\O</chem>                        | 76700  |
| 1641 | 2006 | <chem>Nc1ccccc1NC(=O)/C=C/c1ccc(NC(=O)Cc2ccc3ccccc3c2)cn1</chem>                  | 77100  |
| 1642 | 2007 | <chem>Nc1ccccc1NC(=O)c1ccc(NC(=O)Cc2ccccc2)cn1</chem>                             | 77100  |
| 1643 | 2008 | <chem>Nc1ccccc1NC(=O)c1ccc(CNC2=N[C@H](c3ccccc3)CO2)cc1</chem>                    | 80700  |
| 1644 | 2010 | <chem>Cc1ccc(S(=O)(=O)N[C@@H](Cc2ccc(OCCc3ccccc3)cc2)C(=O)NO)cc1</chem>           | 82500  |
| 1645 | 2011 | <chem>Nc1ccccc1NC(=O)c1ccc(CNC2=N[C@@H](c3ccc(O)cc3)CO2)cc1</chem>                | 83300  |
| 1646 | 2012 | <chem>CNC(=O)/C(CCCCC[C@@H](C(=O)Nc1ccccc1)N(Cc1ccccc1)Cc1ccccc1)=N\O</chem>      | 87000  |
| 1647 | 2013 | <chem>Nc1ccccc1NC(=O)c1ccc(CSC2=N[C@@H](Cc3ccccc3)CO2)cc1</chem>                  | 88000  |
| 1648 | 2015 | <chem>CNC(=O)/C(CCCCC[C@H](NCc1ccc(OC)cc1)C(=O)Nc1ccccc1)=N\O</chem>              | 94600  |
| 1649 | 2016 | <chem>Nc1ccccc1NC(=O)c1ccc(NC(=O)Cc2ccc3ccccc23)cn1</chem>                        | 98400  |
| 1650 | 2017 | <chem>CS(=O)(=O)N[C@@H](Cc1ccc(OCCc2ccccc2)cc1)C(=O)O</chem>                      | 102300 |
| 1651 | 2018 | <chem>O=C(N[C@@H](Cc1ccc(OCCc2ccccc2)cc1)C(=O)O)c1ccccc1</chem>                   | 110500 |
| 1652 | 2020 | <chem>Nc1ccccc1NC(=O)c1ccc(CSC2=N[C@@H](c3ccccc3)CO2)cc1</chem>                   | 112000 |
| 1653 | 2021 | <chem>Nc1ccccc1NC(=O)c1ccc(CNC2=N[C@H](Cc3c[nH]cn3)CO2)cc1</chem>                 | 113000 |
| 1654 | 2022 | <chem>O=C(CCC1=CCN(CCCc2ccc3ccccc3c2)C1=O)NO</chem>                               | 119700 |
| 1655 | 2023 | <chem>CC(=O)N[C@@H](Cc1ccc(OCCc2ccccc2)cc1)C(=O)O</chem>                          | 120900 |
| 1656 | 2025 | <chem>CCn1c(SCCCCC(=O)Nc2ccccc2N)nnc1-c1ccccc1</chem>                             | 198070 |
| 1657 | 2026 | <chem>O=C(N[C@@H](Cc1ccc(OCCc2ccccc2)cc1)C(=O)O)c1ccccc1</chem>                   | 253400 |
| 1658 | 2027 | <chem>Cc1ccc(C(=O)N[C@@H](Cc2ccc(OCCc3ccccc3)cc2)C(=O)O)cc1</chem>                | 385600 |
| 1659 | 2028 | <chem>N[C@H](Cc1ccc(Cl)cc1)C(=O)O</chem>                                          | 410000 |
| 1660 | 2030 | <chem>COC(=O)[C@H](Cc1ccc(OCCc2ccccc2)cc1)NS(C(=O)=O)</chem>                      | 753700 |
| 1661 | 2031 | <chem>COC(=O)[C@H](Cc1ccc(OCCc2ccccc2)cc1)NC(C)=O</chem>                          | 825100 |
| 1662 | 2032 | <chem>COC(=O)[C@H](Cc1ccc(OCCc2ccccc2)cc1)NC(C)=O</chem>                          | 871500 |
| 1663 | 2033 | <chem>COC(=O)[C@H](Cc1ccc(OCCc2ccccc2)cc1)NS(=O)(=O)c1ccc(C)cc1</chem>            | 961800 |

**Table S2.** Test set compounds in SMILES format

| S.No | Compounds | SMILES                                                                                        | Activity (nM) |
|------|-----------|-----------------------------------------------------------------------------------------------|---------------|
| 1    | 2         | <chem>O=C(NO)[C@H](Cc1ccccc1)n1nnc(-c2ccccc2)c1C#CC1CC1</chem>                                | 0.8           |
| 2    | 7         | <chem>CN1c2ccc(NCc3ccc(-c4noc(CCCCCC(=O)NO)n4)cc3)cc2C(=O)N2CCc3c([nH]c4ccc(O)cc34)C21</chem> | 2.5           |
| 3    | 12        | <chem>O=C(CCCCCC(=O)Nc1n[nH]c2cc(-c3ccc(Cl)cc3)ccc12)NO</chem>                                | 3.3           |
| 4    | 17        | <chem>O=C(NO)[C@H](Cc1ccccc1)n1nnc(-c2ccsc2)c1C#CC1CC1</chem>                                 | 4             |
| 5    | 22        | <chem>COc1cccc(-c2ccc3c(NC(=O)CCCCC(=O)NO)n[nH]c3c2)c1F</chem>                                | 4.4           |
| 6    | 27        | <chem>COc1ccc(F)c(-c2ccc3c(NC(=O)CCCCC(=O)NO)n[nH]c3c2)c1</chem>                              | 4.9           |
| 7    | 32        | <chem>O=C(CCCCCC/C=C/c1ccc2ccccc2c1)NO</chem>                                                 | 6             |
| 8    | 37        | <chem>CCCNNC(=O)c1cnc(N2CCN(Cc3c[nH]c4ccccc34)CC2)nc1</chem>                                  | 8.2           |
| 9    | 42        | <chem>CC(C)(C)c1ccc(NS(=O)(=O)c2ccc(C(=O)NO)cc2)cc1</chem>                                    | 9.4           |
| 10   | 47        | <chem>CN(Cc1nc2c(N3CCOCC3)nc(-c3ccncc3)nc2n1C)c1ncc(C(=O)NO)cn1</chem>                        | 11            |
| 11   | 52        | <chem>CCCCCNNC(=O)c1cnc(N2CCN(Cc3c[nH]c4ccccc34)CC2)nc1</chem>                                | 13            |
| 12   | 57        | <chem>O=C1CN(Cc2ccc(C(=O)NO)cc2)C(=O)[C@H](Cc2ccccc2)N1</chem>                                | 15.6          |
| 13   | 62        | <chem>C[C@H](NC(=O)c1nc(-c2ncc(-c3ccccc3)s2)sc1C1CC1)c1ccc(C(=O)NO)cc1</chem>                 | 16.84         |
| 14   | 2034      | <chem>[N-]=[N+]=NCc1cc(Cn2cc(NC(=O)CCCCC(=O)NO)cn2)cc(N=[N+]=[N-])c1</chem>                   | 17            |
| 15   | 67        | <chem>COc1ccc(C(=O)NO)cc1S(=O)(=O)Nc1ccc(C)cc1</chem>                                         | 19.8          |
| 16   | 72        | <chem>Cc1sc2c(c1C)C(c1ccc(Cl)cc1)=N[C@@H](CC(=O)Nc1ccc(C(=O)NO)cc1)c1nnc(C)n1-2</chem>        | 21            |
| 17   | 77        | <chem>CCCCCNNC(=O)c1cnc(N2CCN(Cc3cn(C)c4ccccc34)CC2)nc1</chem>                                | 23            |
| 18   | 82        | <chem>O=C(CCCCCC(=O)Nc1n[nH]c2cc(-c3ccncc3)ccc12)NO</chem>                                    | 24.5          |
| 19   | 87        | <chem>O=C(/C=C/c1cccc(-c2nc3ccccc3n2CCc2ccccc2)c1)NO</chem>                                   | 25            |
| 20   | 92        | <chem>Nc1nc2cc(-c3nn(CC4CCN(c5ncc(C(=O)NO)cn5)CC4)c4ncnc(N)c34)ccc2o1</chem>                  | 27            |
| 21   | 97        | <chem>CC(C)Oc1ccc(C(=O)NO)cc1NC(=O)c1ccccc1</chem>                                            | 29            |
| 22   | 102       | <chem>Cc1nc(-c2cccc(/C=C/C(=O)NO)c2)n([C@@H]2CCCN(C(C)C)C2)c1C</chem>                         | 31            |
| 23   | 107       | <chem>O=C(/C=C/c1cccc(C(=O)c2cc3ccccc3[nH]2)c1)NO</chem>                                      | 32            |
| 24   | 112       | <chem>CC(C)(C)OC(=O)N[C@@H](Cc1ccccc1)C(=O)N1CC2(C[C@H]1C(=O)NCCCCC(=O)NO)SCCS2</chem>        | 35            |
| 25   | 117       | <chem>CC(C)N(C(=O)c1cc(C(C)(C)C)cc(C(C)(C)C)c1)c1ccc(C(=O)NO)cc1</chem>                       | 35.68333      |
| 26   | 122       | <chem>COc1ccc(C(=O)NO)cc1C(=O)Nc1ccc(Cl)cc1</chem>                                            | 38.98718      |
| 27   | 127       | <chem>Cc1nc(-c2cccc(/C=C/C(=O)NO)c2)n([C@@H]2CCCN(C(C)C)C2)c1-c1ccccc1</chem>                 | 40            |
| 28   | 132       | <chem>O=C(NO)c1ccc(CNC(=O)N2CCC(N3C(=O)[C@H](c4ccccc4)[C@H]3c3ccccc3)CC2)cc1</chem>           | 42            |
| 29   | 137       | <chem>O=C(CCCCCC(=O)c1ccc(Br)cc1)NO</chem>                                                    | 45            |
| 30   | 142       | <chem>O=C(/C=C/c1ccc(C(=O)NO)cc1)N[C@@H](Cc1c[nH]c2ccccc12)C(=O)Nc1ccc(Cl)cc1</chem>          | 47.3          |
| 31   | 147       | <chem>O=C(NO)c1cccc(S(=O)(=O)Nc2ccccc2)c1</chem>                                              | 50            |
| 32   | 152       | <chem>CCN1CCC[C@H](n2c(-c3cccc(/C=C/C(=O)NO)c3)nc(C)c2-c2ccccc2)C1</chem>                     | 50            |
| 33   | 157       | <chem>Cc1cccc(NC(=O)[C@H](CCCCC(=O)NO)NC(=O)[C@H]2CCC(=O)N2)c1</chem>                         | 52            |
| 34   | 162       | <chem>COc1cccc(-c2ccc3c(NC(=O)CCCC(=O)NO)n[nH]c3c2)c1</chem>                                  | 54            |
| 35   | 167       | <chem>COc1ccc(C(=O)NO)cc1NC(=O)c1ccc(-c2ccccc2)cc1</chem>                                     | 58.24946      |
| 36   | 172       | <chem>O=C(NO)c1cccc(S(=O)(=O)NCCc2ccccc2)c1</chem>                                            | 60            |
| 37   | 177       | <chem>O=C1C[C@@H](C(=O)N[C@@H](CCCCS)C(=O)Nc2ccccc2)N1</chem>                                 | 61            |
| 38   | 182       | <chem>CCN(CC)CCn1c(-c2cccc(/C=C/C(=O)NO)c2)nc2ccccc21</chem>                                  | 63            |
| 39   | 187       | <chem>O=C(/C=C/c1cccc(-c2nc3ccccc3[nH]2)c1)NO</chem>                                          | 63            |

|    |      |                                                                                                           |          |
|----|------|-----------------------------------------------------------------------------------------------------------|----------|
| 40 | 192  | <chem>COc1ccc(-c2cc(-c3cccc3)[nH]c2C(=O)NCc2ccc(C(=O)NCCS)cc2)cc1</chem>                                  | 64.1     |
| 41 | 197  | <chem>CC(C)(C)c1ccc(CN(Cc2ccc(C(=O)NO)cc2)S(=O)(=O)c2c(F)c(F)c(F)c(F)c2F)cc1</chem>                       | 68       |
| 42 | 202  | <chem>COc1ccc(-c2ccc(/C=C/C(=O)NO)cc2)cc1</chem>                                                          | 69.8     |
| 43 | 207  | <chem>O=C(NO)c1ccc(CCCN2CCC(CN[C@H]3C[C@@H]3c3cccc3)CC2)cc1</chem>                                        | 71       |
| 44 | 212  | <chem>O=C(NO)c1ccc(CN2C(=O)c3cccc3C2=O)cc1-c1cccc1</chem>                                                 | 72       |
| 45 | 217  | <chem>CCC(=O)CCCC[C@H](NC(=O)[C@H]1CC12CCC(N(C)C)CC2)c1ncc(-c2cc3cccc3nc2OC)[nH]1</chem>                  | 75       |
| 46 | 222  | <chem>COc1ccc(C(=O)Nc2cc(C(=O)NO)ccc2OC)cc1</chem>                                                        | 77.1     |
| 47 | 227  | <chem>O=C(/C=C/c1cccc(C(=O)c2cc3cccc3o2)c1)NO</chem>                                                      | 79       |
| 48 | 232  | <chem>O=C(NO)c1ccc2c(c1)C[C@H](Nc1nccc(-c3cccnc3)n1)CC2</chem>                                            | 80       |
| 49 | 237  | <chem>CC(=O)N(Cc1ccc(C(C)(C)C)cc1)c1ccc(C(=O)NO)cc1</chem>                                                | 85.4     |
| 50 | 242  | <chem>COc1cccc1C(=O)N[C@H](COc1cccc(/C=C/C(=O)NO)c1)Cc1c[nH]c2cccc12</chem>                               | 87.4     |
| 51 | 247  | <chem>COc1ccc(CS(=O)(=O)Nc2ccc(/C=C/C(=O)NO)cc2)cc1OC</chem>                                              | 90       |
| 52 | 252  | <chem>O=C(NO)c1ccc(N(Cc2cccc2)C(=O)CN(Cc2c(F)c(F)c(F)c(F)c2F)S(=O)(=O)c2ccc(F)cc2)cc1</chem>              | 90.6     |
| 53 | 257  | <chem>O=C(CCCCCC(=O)Nc1ccc2c(c1)CCC(=O)N2)NO</chem>                                                       | 94       |
| 54 | 262  | <chem>O=C(CCCCC[C@H](NC(=O)[C@@H]1CCCC(=O)N1)C(=O)Nc1cccc1)NO</chem>                                      | 97       |
| 55 | 267  | <chem>Cc1cccc(NC(=O)[C@H](CCCCS)NC(=O)[C@H]2CCC(=O)N2C)c1</chem>                                          | 99       |
| 56 | 272  | <chem>Cc1cccc(S(=O)(=O)Nc2ccc(/C=C/C(=O)NO)cc2)c1</chem>                                                  | 100      |
| 57 | 277  | <chem>CCN1CCC[C@H](n2c(-c3cccc(/C=C/C(=O)NO)c3)nc(C)c2C)C1</chem>                                         | 100      |
| 58 | 282  | <chem>COc1ccc(C(=O)NO)cc1C(=O)Nc1ccc2sccc2c1</chem>                                                       | 100      |
| 59 | 287  | <chem>COc1ccc(NC(=O)[C@@H]2Cc3ccc(OCC(=O)NO)cc3CN2C(=O)[C@@H](NC(=O)OC(C)(C)C)C)cc1</chem>                | 104      |
| 60 | 292  | <chem>O=C1CCC[C@H](C(=O)N[C@@H](CCCCS)C(=O)Nc2cccc2)N1</chem>                                             | 107      |
| 61 | 297  | <chem>COc1cccc(C2c3cccc3CCN2CCC(=O)NO)c1</chem>                                                           | 110      |
| 62 | 302  | <chem>Cc1ccc(C(=O)NO)cc1C(=O)Nc1ccc(Cl)cc1</chem>                                                         | 111.9821 |
| 63 | 307  | <chem>O=C(NO)c1ccc(CC(=O)N2CCC(N3CC(c4cccc4)(c4cccc4)C3=O)CC2)cc1</chem>                                  | 113      |
| 64 | 312  | <chem>C[C@@H](N)C(=O)NCc1nnc(-c2ccc(F)cc2)o1</chem>                                                       | 116      |
| 65 | 317  | <chem>O=C(CCCCCC(=O)Nc1cc(C(F)(F)F)ccc1Cl)NO</chem>                                                       | 119      |
| 66 | 322  | <chem>O=C(NO)c1ccc(Cl)c(NC(=O)c2cccc2)c1</chem>                                                           | 120      |
| 67 | 327  | <chem>CCN1CCC[C@H](n2c(-c3cccc(/C=C/C(=O)NO)c3)nc3cccc32)C1</chem>                                        | 120      |
| 68 | 332  | <chem>O=C(CCCCC[C@H](NC(=O)C1C(=O)NCC1c1cccc1)C(=O)Nc1cccc1)NO</chem>                                     | 123      |
| 69 | 2039 | <chem>C[C@@H](N)C(=O)NCc1nnc(-c2ccc([N+](=O)[O-])cc2)o1</chem>                                            | 127      |
| 70 | 337  | <chem>S=C1Sc2cccc(Cl)c2C2=NCCCN12</chem>                                                                  | 130      |
| 71 | 342  | <chem>CCC(CCCC(=O)Nc1cccc1)CCC(=O)NO</chem>                                                               | 130      |
| 72 | 347  | <chem>O=C(CCCCC[C@H](NC(=O)[C@@H]1CCCC(=O)N1)C(=O)NCCc1cccc1)NO</chem>                                    | 131      |
| 73 | 352  | <chem>CCC(=O)CCCC[C@H]1NC(=O)[C@H]2CCCCN2C(=O)[C@H]([C@H](C)CC)NC(=O)[C@H](Cc2cn(OC)c3cccc23)NC1=O</chem> | 134      |
| 74 | 357  | <chem>CCc1ccc(C(=O)NO)cc1NCc1cccc1</chem>                                                                 | 136      |
| 75 | 362  | <chem>CC(C)(C)OC(=O)N[C@H](Cc1c[nH]c2cccc12)C(=O)N1CC2(C[C@H]1C(=O)NCCCCC(=O)NO)SCCS2</chem>              | 140      |
| 76 | 367  | <chem>COc1ccc(-c2nnc(NC(=O)CN)o2)cc1</chem>                                                               | 142      |
| 77 | 372  | <chem>CC(C)(C)OC(=O)Nc1ccc(Cn2cc(NC(=O)CCCCC(=O)NO)cn2)cc1</chem>                                         | 147      |
| 78 | 377  | <chem>CCOc1ccc(C(=O)NO)cc1NC(=O)c1ccc(-c2cccc2)cc1</chem>                                                 | 148.7    |
| 79 | 382  | <chem>CCC(=O)CCCC[C@H]1NC(=O)[C@H]2CCCN2C(=O)C[C@H](CC(C)C)NC(=O)[C@H](Cc2c[nH]c3cccc23)NC1=O</chem>      | 150      |
| 80 | 387  | <chem>O=C(NO)c1ccc(NC2CCN(c3cccc3Cl)C2=O)cc1</chem>                                                       | 150      |
| 81 | 392  | <chem>COc1ccc(C(=O)NO)cc1NCCc1cccc1</chem>                                                                | 151      |
| 82 | 397  | <chem>NCC(=O)NCc1nnc(-c2cccc2)o1</chem>                                                                   | 155      |

|     |      |                                                                                                                                           |          |
|-----|------|-------------------------------------------------------------------------------------------------------------------------------------------|----------|
| 83  | 402  | <chem>Cc1ccc(-c2cc(C(F)(F)F)c(C#N)c(SCCC#N)n2)o1</chem>                                                                                   | 159      |
| 84  | 407  | <chem>O=C(NO)c1ccc2c(c1)CC(NS(=O)(=O)c1cccc(Cl)c1)CC2</chem>                                                                              | 160      |
| 85  | 412  | <chem>Cc1ccc(C(=O)NO)cc1NCc1ccc(Cl)cc1</chem>                                                                                             | 161      |
| 86  | 417  | <chem>COc1ccc(NC(=O)[C@@H]2Cc3ccc(OCC(=O)NO)cc3CN2C(=O)c2ccccc2)cc1</chem>                                                                | 164      |
| 87  | 422  | <chem>CCCN1CC(=O)N2[C@H](Cc3c(n(Cc4ccc(C(=O)NO)cc4)c4cccc34)[C@@H]2C)C1=O</chem>                                                          | 168      |
| 88  | 427  | <chem>COc1cccc(CN2C(=O)CN(Cc3ccc(C(=O)NO)cc3)C(=O)[C@H]2Cc2ccccc2)c1</chem>                                                               | 171      |
| 89  | 432  | <chem>COc1ccc(NC(=O)[C@@H]2Cc3ccc(OCC(=O)NO)cc3CN2C(=O)[C@H](Cc2ccc(O)cc2)NC(=O)OC(C)(C)C)cc1</chem>                                      | 175      |
| 90  | 437  | <chem>O=C(/C=C/c1cccc1Sc1ccc(Cl)cc1)NO</chem>                                                                                             | 180      |
| 91  | 442  | <chem>COc1ccc(C(=O)NO)cc1NC(=O)c1cccc2cccnc12</chem>                                                                                      | 180      |
| 92  | 447  | <chem>CN(Cc1ccc(C(=O)NO)cc1)S(=O)(=O)c1c(F)c(F)c(F)c(F)c1F</chem>                                                                         | 184      |
| 93  | 452  | <chem>O=C(CCN1CCc2ccccc2C1c1ccc(C(F)(F)F)cc1)NO</chem>                                                                                    | 190      |
| 94  | 457  | <chem>O=C(NO)c1cccc(-c2cn(CSc3ccccc3)nn2)c1</chem>                                                                                        | 194.9002 |
| 95  | 462  | <chem>CC1(C)CC(=O)Nc2ccc(C(=O)NCc3cccc(/C=C/C(=O)NO)c3)cc21</chem>                                                                        | 200      |
| 96  | 467  | <chem>O=C(/C=C/c1ccc(NS(=O)(=O)c2ccccc2)cc1)NO</chem>                                                                                     | 200      |
| 97  | 472  | <chem>CC[C@H](C)[C@H](NC(=O)[C@@H](NC(=O)OC(C)(C)C)C(C)C(=O)N1Cc2cc(OCC(=O)NO)ccc2[C@H]1C(=O)Nc1ccc(OC)cc1</chem>                         | 201      |
| 98  | 477  | <chem>CN1C(=O)CCC[C@H]1C(=O)N[C@@H](CCCCS)C(=O)Nc1cccc1</chem>                                                                            | 202      |
| 99  | 482  | <chem>N[C@H](Cc1ccc(Cl)cc1Cl)C(=O)N1Cc2ccccc2C1</chem>                                                                                    | 206.6826 |
| 100 | 487  | <chem>O=C(NO)c1ccc(CN2c3ccccc3NC(=O)[C@@H]2Cc2ccccc2)cc1</chem>                                                                           | 210      |
| 101 | 492  | <chem>O=C(Cc1ccc(CCCCc2ccc3c(c2)OCO3)cc1)NO</chem>                                                                                        | 210      |
| 102 | 497  | <chem>O=C(COc1ccc(C[C@H](NC(=O)OCc2ccccc2)C(=O)Nc2cccc(Cl)c2)cc1)NO</chem>                                                                | 213      |
| 103 | 502  | <chem>COc1cccc2c1C(=O)c1c(O)c3c(c(O)c1C2=O)C[C@@](O)(C(C)=O)C[C@@H]3O[C@H]1C[C@H](N)[C@H](O)[C@H](C)O1</chem>                             | 220      |
| 104 | 507  | <chem>COc1cccc2c1C(=O)c1c(O)c3c(c(O)c1C2=O)C[C@@](O)(C(C)=O)C[C@@H]3O[C@H]1C[C@H](NCc2ccc(NC(=O)CCCCC(=O)NO)cc2)[C@H](O)[C@H](C)O1</chem> | 220      |
| 105 | 512  | <chem>Cc1ccc(-c2cc(C(F)(F)F)nn2-c2ccc(S(=O)(=O)NCCCCC(=O)NO)cc2)cc1</chem>                                                                | 226      |
| 106 | 517  | <chem>O=C(NO)c1ccc(CNCc2nc(-c3ccc(F)cc3)no2)cc1</chem>                                                                                    | 230      |
| 107 | 522  | <chem>COc1cc(C(=O)NO)ccc1CS(=O)(=O)Nc1ccc2c(c1)cc(C)c(=O)n2C</chem>                                                                       | 231      |
| 108 | 527  | <chem>CC(C)Cc1nc2cc(/C=C/C(=O)NO)ccc2n1CCCO</chem>                                                                                        | 238      |
| 109 | 532  | <chem>COc1ccc(C(=O)NO)cc1NC(C)c1ccc(Cl)cc1</chem>                                                                                         | 240      |
| 110 | 537  | <chem>Cc1cccc(CCNC(=O)CCCCCS)c1</chem>                                                                                                    | 246      |
| 111 | 542  | <chem>CCCNNC(=O)c1cnc(N2CCN(C)CC2)nc1</chem>                                                                                              | 250      |
| 112 | 547  | <chem>CC[C@H](Nc1ncnc2[nH]cnc12)c1nc2cccc(CCCCC(=O)NO)c2c(=O)n1-c1ccccc1</chem>                                                           | 253      |
| 113 | 552  | <chem>CCN(CC)CCn1c(CCc2ccccc2)nc2cc(/C=C/C(=O)NO)ccc21</chem>                                                                             | 255      |
| 114 | 557  | <chem>O=C(NO)c1ccc(NC2CCN(CCc3ccccc3)C2=O)cc1</chem>                                                                                      | 260      |
| 115 | 562  | <chem>CC(C)CCc1c(OCCCCC(=O)NO)ccc(CCC(=O)NO)c1O</chem>                                                                                    | 267.85   |
| 116 | 567  | <chem>C#Cc1nc(/C=C/CCCCC(=O)NO)cs1</chem>                                                                                                 | 270      |
| 117 | 572  | <chem>O=C(NO)[C@]1(F)[C@H](c2ccccc2)[C@H]1c1ccc(-c2ncc(F)cn2)cc1</chem>                                                                   | 280      |
| 118 | 577  | <chem>O=C(/C=C/c1ccc(C(=O)NC(Cc2c[nH]c3ccccc23)C(=O)Nc2cccc(Br)c2)cc1)NO</chem>                                                           | 281.1    |
| 119 | 582  | <chem>CC(C)c1cc(C(=O)N2CCc3cc(NC(=O)CCCCC(=O)NO)ccc32)c(O)cc1O</chem>                                                                     | 284      |
| 120 | 587  | <chem>O=C(/C=C/c1ccc2c(c1)nc(CCC1ccccc1)n2CCc1cccn1)NO</chem>                                                                             | 290      |
| 121 | 2044 | <chem>O=C(/C=C/c1ccc(C(=O)NCCOc2no[n+](O-))c2S(=O)(=O)c2ccccc2)cc1)NO</chem>                                                              | 290      |
| 122 | 592  | <chem>CN1c2ccc(/C=C/C(=O)NO)cc2NC1CCc1ccccc1</chem>                                                                                       | 291      |
| 123 | 597  | <chem>O=C(NO)c1ccc(-c2cccc3ccccc23)cc1</chem>                                                                                             | 300      |
| 124 | 602  | <chem>O=C(CCCCCNC(=O)c1ncc(-c2ccc(Br)cc2)o1)NO</chem>                                                                                     | 302.73   |

|     |      |                                                                                              |          |
|-----|------|----------------------------------------------------------------------------------------------|----------|
| 125 | 607  | <chem>CC(CCCCC(=O)NO)n1cc(-c2ncnc3[nH]ccc23)cn1</chem>                                       | 310      |
| 126 | 612  | <chem>O=C(NO)c1ccc(CN(C2CC2)S(=O)(=O)c2c(F)cc(F)cc2F)cc1</chem>                              | 315      |
| 127 | 617  | <chem>COc1ccc(C(=O)NO)cc1NC(=O)c1cccc2c1oc1cccc12</chem>                                     | 320      |
| 128 | 622  | <chem>O=C(CCCCCNC(=O)Cn1cnc2c(Nc3cccc3)nc(Nc3cccc3)nc21)NO</chem>                            | 320      |
| 129 | 627  | <chem>O=C(NO)c1ccc(/C=C/c2nc3cccc3c(=O)[nH]2)cc1</chem>                                      | 325      |
| 130 | 632  | <chem>O=C(NO)c1ccc(CN(Cc2cccn2)S(=O)(=O)c2cc(F)c(F)c(F)c2F)cc1</chem>                        | 332      |
| 131 | 637  | <chem>Cc1ccc(NC(=O)CCCCC(=O)NO)cc1</chem>                                                    | 336      |
| 132 | 642  | <chem>CC(C)[C@@H]1NC(=O)[C@]2(C)CSC(=N2)c2cccc(n2)CNC(=O)C[C@@H]1(/C=C/CCS)OC1=O</chem>      | 341.3    |
| 133 | 647  | <chem>Cc1ccc(-c2cc(C(=O)NCCCCC(=O)NO)nn2-c2ccc(S(C)(=O)=O)cc2)cc1</chem>                     | 345      |
| 134 | 652  | <chem>O=C(NO)c1ccc(CNCc2nc(-c3ccc(Cl)cc3)no2)cc1</chem>                                      | 350      |
| 135 | 657  | <chem>Nc1cccc1NC(=O)c1ccc(Cn2cnc3c(Nc4ccc(C(=O)NO)cc4)nc(Cl)nc32)cc1</chem>                  | 352      |
| 136 | 662  | <chem>O=C(NO)c1ccc(NC(=O)c2cccc(C(F)(F)F)c2)cc1</chem>                                       | 356.5782 |
| 137 | 667  | <chem>Cc1cc2cc(NS(=O)(=O)Cc3ccc(C(=O)NO)cc3)ccc2n(C)c1=O</chem>                              | 360      |
| 138 | 672  | <chem>O=C(NO)c1ccc2c(c1)CC(NS(=O)(=O)c1cccn1)CC2</chem>                                      | 370      |
| 139 | 677  | <chem>O=C(CCCCCC(=O)NCCc1cccc1)NO</chem>                                                     | 376      |
| 140 | 682  | <chem>O=C(CCCC(CCC(=O)Nc1cccc1)Cc1cccc1)NO</chem>                                            | 380      |
| 141 | 687  | <chem>COc1ccc(-c2nc(C(=O)NCCCC(=O)NO)cc3c2[nH]c2cccc23)cc1</chem>                            | 390      |
| 142 | 692  | <chem>CN1CCCC1c1cn(Cc2ccc(C(=O)NO)cc2)c2cccc12</chem>                                        | 398.11   |
| 143 | 697  | <chem>O=C(NO)c1ccc(CN(CCO)C(=O)Cc2cccc2)cc1</chem>                                           | 400      |
| 144 | 702  | <chem>COc1ccc(-c2nc3cc(/C=C/C(=O)NO)ccc3n2CCO)cc1</chem>                                     | 401      |
| 145 | 707  | <chem>O=C(NCC12C[C@H]3C[C@@H](C1)C[C@@H](C2)C3)c1ccc2c(ccn2C c2ccc(C(=O)NO)c(Cl)c2)c1</chem> | 410      |
| 146 | 712  | <chem>Cc1ccc(-c2cc(C(F)(F)F)nn2-c2ccc(S(=O)(=O)NCCCCC(=O)NO)cc2)cc1</chem>                   | 412      |
| 147 | 717  | <chem>S=C1Sc2cccc(Br)c2C2=NCCN12</chem>                                                      | 420      |
| 148 | 722  | <chem>COc1cc2ccn(CCOc3cccc(NC(=O)CCCCC(=O)NO)c3)c2c(OC)c1OC</chem>                           | 420.9    |
| 149 | 727  | <chem>CCCC(CCCC(=O)NO)CCC(=O)Nc1cccc1</chem>                                                 | 430      |
| 150 | 732  | <chem>O=C(NO)c1ccc(CN2C(=O)CNC(=O)[C@H]2Cc2cccs2)cc1</chem>                                  | 440      |
| 151 | 737  | <chem>N[C@@H](CCCCC(=O)c1con1)c1cnn(-c2ccc(F)cc2)n1</chem>                                   | 445      |
| 152 | 742  | <chem>O=C(/C=C/c1ccc2c(c1)nc(CCc1cccc1)n2CC(O)CO)NO</chem>                                   | 454      |
| 153 | 747  | <chem>N[C@@H](CCCCC(=O)c1con1)c1cnn(-c2ccc(F)cc2)c1</chem>                                   | 466      |
| 154 | 752  | <chem>O=C(NO)c1ccc2c(c1)CC(Nc1nccc(-c3ccnc3)n1)CN2</chem>                                    | 470      |
| 155 | 757  | <chem>Cc1ccc(-c2ccnc(NC3Cc4ccc(C(=O)NO)cc4C3)n2)cn1</chem>                                   | 480      |
| 156 | 762  | <chem>CCN1CCC[C@@H](n2c(C)nc(C)c2-c2cccc(/C=C/C(=O)NO)c2)C1</chem>                           | 500      |
| 157 | 767  | <chem>O=C(NO)c1ccc2c(c1)CC(Nc1nccc(-c3ccnc3Cl)n1)CC2</chem>                                  | 510      |
| 158 | 772  | <chem>O=C(CCCCCC(=O)Nc1ccc(-c2cnn2-c2cccc2)cc1)NO</chem>                                     | 518      |
| 159 | 777  | <chem>O=C1CN(Cc2ccc(C(=O)NO)cc2)c2cccc2N1</chem>                                             | 520      |
| 160 | 782  | <chem>O=C(Cc1ccc(CCCc2cc(F)c(F)cc2F)cc1)NO</chem>                                            | 530      |
| 161 | 787  | <chem>O=C(NO)c1ccc(Cn2ccc3cc(C(=O)NCC45[C@H]6C[C@@H](C4)C[C@@H](C5)C6)ccc32)c(F)c1</chem>    | 540      |
| 162 | 792  | <chem>COc1ccc(C(=O)NO)cc1NC(=O)c1ccc(Cl)cc1Cl</chem>                                         | 548.3    |
| 163 | 797  | <chem>CC(C)CCc1c(OCCCCC(=O)NO)ccc2ccc(=O)oc12</chem>                                         | 553.45   |
| 164 | 802  | <chem>COc1ccc2c(ccn2CCOc2ccc(NC(=O)CCCCC(=O)NO)cc2)c1</chem>                                 | 560.9    |
| 165 | 807  | <chem>CS(=O)(=O)Nc1ccc(-c2ccnc(Nc3ccc(N4CCC(C(=O)NCCCCC(=O)NO)CC4)cc3)n2)cc1</chem>          | 572      |
| 166 | 812  | <chem>O=C(NO)c1ccc(CN(Cc2cnc2)S(=O)(=O)c2cc(F)c(F)c(F)c2F)cc1</chem>                         | 581      |
| 167 | 817  | <chem>CC1(Nc2ccc(C(=O)NO)cc2)CCN(c2cccc2)C1=O</chem>                                         | 590      |
| 168 | 822  | <chem>O=C(NO)c1ccc2c(c1)C(=O)c1cccc1C2=O</chem>                                              | 599      |
| 169 | 827  | <chem>CN(c1ccc(/C=C/C(=O)NO)cc1)S(=O)(=O)c1cccc1</chem>                                      | 600      |
| 170 | 2049 | <chem>O=C(CCCCC(c1c[nH]c2ccc([N+](=O)[O-])cc12)c1c[nH]c2ccc([N+](=O)[O-])cc12)NO</chem>      | 600      |
| 171 | 832  | <chem>COC(=O)c1ccc(CO/N=C/c2ccc(/C=C/C(=O)NO)cc2)cc1</chem>                                  | 603      |

|     |      |                                                                                                                                                                                                                                  |          |
|-----|------|----------------------------------------------------------------------------------------------------------------------------------------------------------------------------------------------------------------------------------|----------|
| 172 | 837  | O=C(NO)c1ccc(-c2ccnc(Nc3ccc(N4CCOCC4)cc3)n2)cc1                                                                                                                                                                                  | 609      |
| 173 | 842  | COc1cccc(-<br>c2nc(NCc3ccc(/C=C/C(=O)NO)cc3)cc3c2[nH]c2cccc23)c1                                                                                                                                                                 | 617      |
| 174 | 847  | O=C(/C=C/c1cccc(-<br>c2ccc3ncnc(Nc4ccc(OCc5cccc(F)c5)c(Cl)c4)c3c2)c1)NO                                                                                                                                                          | 630      |
| 175 | 852  | CC12CC3CC(C)(C1)CC(NCc1ccc(NC(=O)CCCCC(=O)NO)cc1)(C3)C2                                                                                                                                                                          | 638      |
| 176 | 857  | O=CN(O)CCCCCCC(=O)Nc1cccc2cccc12                                                                                                                                                                                                 | 650      |
| 177 | 862  | C#Cc1nc(/C=C/C(=O)NO)cs1                                                                                                                                                                                                         | 670      |
| 178 | 867  | O=C(NO)c1ccc(N(Cc2cccc(C(F)(F)F)c2)C(=O)c2cccc(C(F)(F)F)c2)cc1                                                                                                                                                                   | 686.3643 |
| 179 | 872  | Cn1cccc1C(=O)NCc1ccc(C(=O)NO)cc1                                                                                                                                                                                                 | 690      |
| 180 | 877  | CCNNC(=O)c1ccc(-c2ccc(CNC(C)=O)cc2)cc1                                                                                                                                                                                           | 700      |
| 181 | 882  | CC[C@H]1OC(=O)[C@H](C)[C@H](O[C@H]2C[C@@](C)(OC)[C@]<br>(O)(CN(C)Cc3ccc(-<br>c4cn(CCCC(=O)NO)nn4)cc3)[C@H](C)O2)[C@H](C)[C@H](O[C@H]<br>2O[C@@H](C)C[C@@H](N(C)C)[C@H]2O)[C@@](C)(O)C[C@H](<br>C)CN(C)[C@H](C)[C@H](O)[C@@]1(C)O | 709      |
| 182 | 887  | CC(C)c1cc(-n2nnc(C(=O)NCCCCC(=O)NO)c2-<br>c2ccc(CN3CCOCC3)cc2)c(O)cc1O                                                                                                                                                           | 717      |
| 183 | 892  | O=C(NO)c1ccc2c(c1)CC(Nc1ncccn1)CC2                                                                                                                                                                                               | 730      |
| 184 | 897  | O=C(CCCCCOc1ccc2cc1COC/C=C/COc1cccc(c1)-<br>c1ccnc(n1)N2)NO                                                                                                                                                                      | 740      |
| 185 | 902  | CN1CC(NS(=O)(=O)c2ccc(Cl)cc2)Cc2cc(C(=O)NO)ccc21                                                                                                                                                                                 | 750      |
| 186 | 907  | O=C(CCCCCc1nc(-c2cccc2)no1)C(F)(F)F                                                                                                                                                                                              | 760      |
| 187 | 912  | O=C(C=C1c2cccc2-c2cccc21)NCCCCC(=O)NO                                                                                                                                                                                            | 779      |
| 188 | 917  | COc1cc2c(cc1-c1c(C)noc1C)[nH]c1nc(C)nc(NCCCCC(=O)NO)c12                                                                                                                                                                          | 782      |
| 189 | 922  | O=C(CCCCCC(=O)Nc1ccc(-c2cnnn2Cc2cccc2)cc1)NO                                                                                                                                                                                     | 790      |
| 190 | 927  | CN(C)Cc1nn(Cc2ccc(C(=O)NO)cc2)c2cccc12                                                                                                                                                                                           | 794.33   |
| 191 | 932  | Cc1ccc(-c2ccc(Cn3cccc(O)c3=S)cc2)cc1                                                                                                                                                                                             | 800      |
| 192 | 937  | COc1ccc(C(=O)c2ccc3c(ccn3S(=O)(=O)c3ccc(/C=C/C(=O)NO)c3)c2)<br>cc1                                                                                                                                                               | 812      |
| 193 | 942  | CN(C)CCCNC(=O)c1cc(NC(=O)c2cc(NC(=O)c3cc(NC(=O)c4nc(NC(=O)<br>CCCNC(=O)c5cc(NC(=O)c6cc(NC(=O)c7cc(NC(=O)c8nc(NC(=O)CCNC<br>(=O)CCNC(=O)c9ccc(NC(=O)CCCCC(=O)NO)cc9)cn8C)cn7C)cn6C)<br>cn5C)cn4C)cn3C)cn2C)cn1C                   | 820      |
| 194 | 947  | FC(F)(F)c1ccc2c(c1)C1=NCCCN1C(=S)S2                                                                                                                                                                                              | 830      |
| 195 | 952  | O=C(CCCCCn1cc(Nc2ncc(Cl)c(Nc3ccc(Cl)c3)n2)cn1)NO                                                                                                                                                                                 | 840      |
| 196 | 957  | CC(C)Cc1nc2cc(/C=C/C(=O)NO)ccc2n1Cc1cccc1                                                                                                                                                                                        | 846      |
| 197 | 962  | O=C(NO)c1ccc(NC2CCN(c3ccc(Cl)cc3)C2)cc1                                                                                                                                                                                          | 860      |
| 198 | 967  | O=C(/C=C/c1ccc(S(=O)(=O)NCCCN2c3cccc3CCc3ccc(Cl)cc32)cc1)N<br>O                                                                                                                                                                  | 874      |
| 199 | 972  | O=C(/C=C/c1ccc2c(c1)nc(-c1ccncc1)n2CCO)NO                                                                                                                                                                                        | 883      |
| 200 | 977  | O=C(Cc1ccc(NS(=O)(=O)c2cccc2)cc1)NO                                                                                                                                                                                              | 900      |
| 201 | 982  | O=C(/C=C/c1ccc(CNCc2ccc3cccc(Cl)c3n2)cc1)NO                                                                                                                                                                                      | 911      |
| 202 | 987  | O=C(NO)c1ccc(CNC(=O)c2ccc(Cl)c(Cl)c2)cc1                                                                                                                                                                                         | 920      |
| 203 | 992  | CNc1ccc(C(=O)NO)cc1                                                                                                                                                                                                              | 940      |
| 204 | 997  | O=C(CCN1CCc2cccc2C1c1cccc1)NO                                                                                                                                                                                                    | 950      |
| 205 | 1002 | O=C(NO)c1cccc(Cn2c(=O)[nH]c(=O)c3cccc(Cl)c32)c1                                                                                                                                                                                  | 966      |
| 206 | 1007 | O=C(Cc1ccc2cccc2c1)Nc1ccc(C(=O)NO)nc1                                                                                                                                                                                            | 976      |
| 207 | 1012 | CC[C@H]1OC(=O)[C@H](C)[C@@H](O[C@@H]2C[C@@](C)(OC)[C@]<br>H)(O)[C@H](C)O2)[C@@H](C)[C@@H](O[C@H]2O[C@@H](C)C[<br>C@@H](N(C)Cc3ccc(-<br>c4cn(CCCC(=O)NO)nn4)cc3)[C@@H]2O)[C@](C)(OC)C[C@@H](C)C<br>(=O)[C@H](C)[C@H](O)[C@]1(C)O  | 986      |
| 208 | 1019 | CCCC[C@H]1NC(=O)C[C@@H](/C=C/CCS)OC(=O)C[C@H](O)[C@@<br>H]([C@@H](C)CC)NC(=O)[C@@H](CS)NC1=O                                                                                                                                     | 1000     |

|     |      |                                                                                                                                                                                                                                 |          |
|-----|------|---------------------------------------------------------------------------------------------------------------------------------------------------------------------------------------------------------------------------------|----------|
| 209 | 1024 | <chem>S=C1Sc2ccc(I)cc2C2=NCCN12</chem>                                                                                                                                                                                          | 1000     |
| 210 | 1029 | <chem>CCCN(C(=O)c1cnc(NCc2ccccc2)nc1</chem>                                                                                                                                                                                     | 1000     |
| 211 | 1034 | <chem>CNc1nc(Cl)nc2c1nnc2Cc1ccc(C(=O)Nc2ccccc2N)cc1</chem>                                                                                                                                                                      | 1020     |
| 212 | 1039 | <chem>O=C(CCCCCc1nc(-c2ccc(C(F)(F)F)cc2)no1)C(F)(F)F</chem>                                                                                                                                                                     | 1030     |
| 213 | 1044 | <chem>[11CH3]n1cc(CCNc2ccc(/C=C/C(=O)NO)cc2)c2ccccc21</chem>                                                                                                                                                                    | 1044     |
| 214 | 1049 | <chem>Cc1nc2ccc(/C=C/C(=O)NO)c2c(=O)n1-c1ccccc1</chem>                                                                                                                                                                          | 1060     |
| 215 | 1054 | <chem>O=C(NO)c1ccc(Cn2c(=O)n(Cc3ccccc3)c(=O)c3ccnc32)cc1</chem>                                                                                                                                                                 | 1068     |
| 216 | 1059 | <chem>COc1cc(NC(=O)NOCCCCC(=O)NO)c2ncccc2c1</chem>                                                                                                                                                                              | 1080     |
| 217 | 1064 | <chem>CC[C@@H]1OC(=O)[C@H](C)[C@@H](O[C@H]2C[C@@](C)(OC)[C@](O)(CN(C)C)[C@H](C)O2)[C@@H](C)[C@@H](O[C@H]2O[C@H](C)[C@H](N(C)Cc3ccc(-c4cn(CCCCC(=O)NO)nn4)cc3)[C@H]2O)[C@](C)(O)C[C@@H](C)CN(C)[C@H](C)[C@@H](O)[C@]1(C)O</chem> | 1090     |
| 218 | 1069 | <chem>Cc1c(NC(=O)CN2C(=O)S/C=C\c3ccc(Br)cc3)C2=O)c(=O)n(-c2ccccc2)n1C</chem>                                                                                                                                                    | 1093     |
| 219 | 1074 | <chem>S=C1Sc2cc(Br)ccc2C2=NCCCN12</chem>                                                                                                                                                                                        | 1100     |
| 220 | 1079 | <chem>C#CCN(C)CCCOc1cc(NC(=O)CCCCCCC(=O)NO)ccc1Cl</chem>                                                                                                                                                                        | 1120     |
| 221 | 1084 | <chem>CC(C)(C)OC(=O)NCCCC[C@@H]1C(=O)Nc2ccccc2N1Cc1ccc(C(=O)NO)cc1</chem>                                                                                                                                                       | 1150     |
| 222 | 1089 | <chem>C#CCN(C)CCCOc1cc(NCc2ccc(C(=O)NO)cc2)ccc1Cl</chem>                                                                                                                                                                        | 1170     |
| 223 | 1094 | <chem>CCc1nc2cc(/C=C/C(=O)NO)ccc2c(=O)n1CCc1ccccc1</chem>                                                                                                                                                                       | 1180     |
| 224 | 1099 | <chem>CC(C)(C)OC(=O)NCC(=O)N1CC2(C[C@H]1C(=O)NCCCCC(=O)NO)SCCS2</chem>                                                                                                                                                          | 1190     |
| 225 | 1104 | <chem>O=C(N[C@@H](C(=O)O)c1ccccc1)c1cccc(=S)n1O</chem>                                                                                                                                                                          | 1200     |
| 226 | 1109 | <chem>CC(C)(C)OC(=O)Nc1cccc(C(=O)/C=C/c2ccc(/C=C/C(=O)NO)cc2)c1</chem>                                                                                                                                                          | 1200     |
| 227 | 1114 | <chem>CC(C)c1cc(C(=O)N2CCc3cc(NC(=O)CCCCCCC(=O)NO)ccc32)c(O)cc1O</chem>                                                                                                                                                         | 1220     |
| 228 | 1119 | <chem>COc1ccc(-c2ccnc(NC3CCc4ccc(C(=O)NO)cc4C3)n2)c(OC)c1</chem>                                                                                                                                                                | 1230     |
| 229 | 1124 | <chem>COc1ccc(CN2CCC(Nc3nc(Nc4ccc(NC(=O)CCCCC(=O)NO)cc4)nc4c(O)C(OC)cc34)CC2)cc1</chem>                                                                                                                                         | 1260     |
| 230 | 1129 | <chem>Cc1cc(C)cc(C(=O)NOCCCCC(=O)NO)c1</chem>                                                                                                                                                                                   | 1278     |
| 231 | 1134 | <chem>CCCCC(CCCCC(=O)Nc1ccccc1)C(=O)NO</chem>                                                                                                                                                                                   | 1300     |
| 232 | 1139 | <chem>O=C(NCCS)/C(Cc1ccc(O)c(Br)c1)=N/O</chem>                                                                                                                                                                                  | 1300     |
| 233 | 1144 | <chem>O=C(CCCCCC(=O)Nc1cccc(-c2cn(-c3cc(CO)cc(CO)c3)nn2)c1)NO</chem>                                                                                                                                                            | 1320     |
| 234 | 1149 | <chem>C[C@]12CC[C@@H]3c4ccc(O)cc4CC[C@H]3[C@@H]1CC[C@@]2(O)c1cn(CCCCCC(=O)NO)nn1</chem>                                                                                                                                         | 1341.641 |
| 235 | 1154 | <chem>CC(=O)NCCCC[C@@H]1NC(=O)C[C@H](Cc2ccc(O)cc2)NC(=O)[C@H](Cc2ccccc23)NC(=O)[C@H](CCCCC(=O)O)NC1=O</chem>                                                                                                                    | 1380     |
| 236 | 1159 | <chem>Nc1ccccc1NC(=O)c1ccc(CNC2=NC[C@@H](c3ccccc3)S2)cc1</chem>                                                                                                                                                                 | 1400     |
| 237 | 1164 | <chem>O=C(CCN(Cc1ccccc1)Cc1ccccc1)NO</chem>                                                                                                                                                                                     | 1400     |
| 238 | 1169 | <chem>O=C(CCCCCC(=O)N/N=C/c1cnc(Nc2ccccc2)c2ccccc2)nc1NO</chem>                                                                                                                                                                 | 1430     |
| 239 | 1174 | <chem>CC[C@@H]1OC(=O)[C@H](C)[C@@H](O[C@H]2C[C@@](C)(OC)[C@H](O)[C@H](C)O2)[C@@H](C)[C@@H](O[C@H]2O[C@H](C)[C@H](N(C)Cc3ccc(-c4cn(CCCCC(=O)NO)nn4)c3)[C@H]2O)[C@](C)(O)C[C@@H](C)CN(C)[C@H](C)[C@@H](O)[C@]1(C)O</chem>         | 1440     |
| 240 | 1179 | <chem>N#Cc1ccc(-c2cn(CCCCN3CCCC(O)c3=S)nn2)cc1</chem>                                                                                                                                                                           | 1465     |
| 241 | 1184 | <chem>N#Cc1ccc2c(c1)CCCN2Cc1ccc(C(=O)NO)cc1</chem>                                                                                                                                                                              | 1490     |
| 242 | 1189 | <chem>S=C1Sc2ccccc2C2=NCCCN12</chem>                                                                                                                                                                                            | 1500     |
| 243 | 1194 | <chem>Cc1nc(N(C)c2ccc(OCCCCC(=O)NO)cc2)c2ccccc2n1</chem>                                                                                                                                                                        | 1510     |
| 244 | 1199 | <chem>CCCNc1ccc2c3c(cccc13)C(=O)N(CCCCC(=O)NO)C2=O</chem>                                                                                                                                                                       | 1520     |
| 245 | 1204 | <chem>CC(C)(C)OC(=O)N1Cc2cc(OCC(=O)NO)ccc2C[C@H]1C(=O)Nc1ccc(F)c(Cl)c1</chem>                                                                                                                                                   | 1550     |
| 246 | 1209 | <chem>Oc1cccn(Cc2cn(-c3ccccc3)nn2)c1=S</chem>                                                                                                                                                                                   | 1570     |
| 247 | 1214 | <chem>CCC(=O)CCCC[C@H](NC(=O)[C@H]1CC12CCN(C)CC2)c1ncc(-</chem>                                                                                                                                                                 | 1600     |

|     |      |                                                                                                                                                                                                                     |      |
|-----|------|---------------------------------------------------------------------------------------------------------------------------------------------------------------------------------------------------------------------|------|
|     |      | c2ccc3nc(CC)ccc3c2)[nH]1                                                                                                                                                                                            |      |
| 248 | 1219 | N[C@@H](Cc1cccc1)C(=O)Nc1cccc1-c1ccc(NC(=O)CCCCC(=O)NO)cc1                                                                                                                                                          | 1600 |
| 249 | 1224 | O=C(NO)c1ccc(-c2nc3cccc3c(=O)[nH]2)cc1                                                                                                                                                                              | 1620 |
| 250 | 1229 | Cc1ccc(NC(=O)[C@@H]2Cc3ccc(OCC(=O)NO)cc3CN2C(=O)OC(C)(C)C)cc1                                                                                                                                                       | 1650 |
| 251 | 1234 | O=C(NO)c1ccc2c(c1)CC(Nc1nccc(-c3ccc(C(F)(F)F)cc3)n1)CC2                                                                                                                                                             | 1690 |
| 252 | 1239 | O=C(CCCCCCNc1ccc(F)cc1)NO                                                                                                                                                                                           | 1700 |
| 253 | 1244 | N#Cc1cccc(-c2ccc(Cn3cccc(O)c3=S)cc2)c1                                                                                                                                                                              | 1701 |
| 254 | 1249 | COc1cc2c(cc1OC)C(=O)C(CC1CCN(S(=O)(=O)c3cccc/C=C/C(=O)NO)c3)CC1)C2                                                                                                                                                  | 1720 |
| 255 | 1254 | CC[C@H](Nc1ncnc2[nH]cnc12)c1nc2cccc(NCCCC(=O)NO)c2c(=O)n1-c1cccc1                                                                                                                                                   | 1758 |
| 256 | 1259 | C#CCN(C)CCCOc1cc(NC(=O)CCCCC(=O)NO)c(Cl)cc1Cl                                                                                                                                                                       | 1780 |
| 257 | 1264 | C#Cc1nc(/C=C/C(=O)NO)cs1                                                                                                                                                                                            | 1800 |
| 258 | 1269 | O=C(CCCCN1C(=O)c2cccc3c(N4CCOCC4)ccc(c23)C1=O)NO                                                                                                                                                                    | 1810 |
| 259 | 1274 | CC[C@H]1OC(=O)[C@H](C)[C@H](O[C@H]2C[C@@](C)(OC)[C@](O)(CN(C)Cc3ccc(-c4cn(CCCCCC(=O)NO)nn4)cc3)[C@H](C)O2)[C@H](C)[C@H](O[C@H]2O[C@H](C)C[C@H](N(C)C)[C@H]2O)[C@@](C)(OC)C[C@H](C)C(=O)[C@@H](C)[C@@H](O)[C@@]1(C)O | 1840 |
| 260 | 1279 | CCc1nc2cc(Cl)c(/C=C/C(=O)NO)cc2c(=O)n1CCc1cccc1                                                                                                                                                                     | 1880 |
| 261 | 1284 | CC(C)(C)OC(=O)NCCC(=O)N1CC2(C[C@H]1C(=O)NCCCCC(=O)NO)S                                                                                                                                                              | 1900 |
| 262 | 2055 | [C-]#[N+]c1cccc1-c1ccc(Cn2cccc(O)c2=S)cc1                                                                                                                                                                           | 1907 |
| 263 | 1289 | CC(C)C(c1ccc(C(=O)NO)cc1)C(C)C                                                                                                                                                                                      | 1920 |
| 264 | 1294 | CCC(=O)CCCC[C@H](NC(=O)[C@H]1CC12CCN(C)CC2)c1nnc(-c2cc3cccc3nc2OC)[nH]1                                                                                                                                             | 1931 |
| 265 | 1299 | COc1cc(CNc2nc(NCc3ccc(C(=O)Nc4cccc4N)cc3)nc3[nH]ccc23)cc(O)C)cc1                                                                                                                                                    | 1950 |
| 266 | 1304 | CC(C)(C)OC(=O)N1Cc2cc(OCC(=O)NO)ccc2C[C@H]1C(=O)Nc1ccc(-c2cccc2)cc1                                                                                                                                                 | 1980 |
| 267 | 1309 | O=C(NO)c1ccc(CN2c3ccncc3Sc3ncccc32)cc1                                                                                                                                                                              | 2000 |
| 268 | 1314 | O=C1Sc2cccc2C2=NCCCN12                                                                                                                                                                                              | 2000 |
| 269 | 1319 | CCC(=O)CCCC[C@H](NC(=O)[C@H]1CC12CN(C)C2)c1ncc(-c2cc3cccc3nc2OC)[nH]1                                                                                                                                               | 2024 |
| 270 | 1324 | N[C@@H](Cc1ccc(O)cc1)C(=O)Nc1cccc1-c1ccc(NC(=O)CCCCC(=O)NO)cc1                                                                                                                                                      | 2060 |
| 271 | 1329 | O=C(NO)c1ccc(CN2C(=O)CCc3cc(Cl)ccc32)cc1                                                                                                                                                                            | 2080 |
| 272 | 1334 | O=C(NO)c1ccc(NCc2csc3ccc(Br)cc23)cc1                                                                                                                                                                                | 2100 |
| 273 | 1339 | O=C(CCCCC[C@H](NC(=O)[C@@H]1CCCC(=O)N1)C(=O)NC1CCCC1)NO                                                                                                                                                             | 2130 |
| 274 | 1344 | CC1(C)c2cccc2N(Cc2ccc(C(=O)NO)cc2)C1c1ccnc1                                                                                                                                                                         | 2170 |
| 275 | 1349 | O=C(NCc1ccc(C(=O)Nc2cccc2O)cc1)OCc1ccnc1                                                                                                                                                                            | 2200 |
| 276 | 1354 | COc1cc(-c2ncc(/C=C/C(=O)NO)s2)cc(OC)c1OC                                                                                                                                                                            | 2220 |
| 277 | 1359 | O=C(NO)c1ccc2c(c1)CC(Nc1nccc(-c3ccc(F)c(Cl)c3)n1)CC2                                                                                                                                                                | 2240 |
| 278 | 1364 | S=C1Sc2cccc(l)c2C2=NCCN12                                                                                                                                                                                           | 2300 |
| 279 | 1369 | CCC(=O)CCCC[C@H](NC(=O)[C@@H]1CCC12CCN(CC)CC2)c1ncc(-c2cc3cccc3nc2OC)[nH]1                                                                                                                                          | 2328 |
| 280 | 1374 | CCCN(C(=O)c1ccc(Nc2cccc2)cc1)                                                                                                                                                                                       | 2352 |
| 281 | 1379 | O=C(NO)c1ccc(C(c2cccc2)c2cccc2)cc1                                                                                                                                                                                  | 2380 |
| 282 | 2060 | O=C(CCCCCc1nc(-c2cccc([N+](=O)[O-])c2)no1)NO                                                                                                                                                                        | 2380 |
| 283 | 1384 | O=C(/C=C/C=C/c1csc(Br)n1)NO                                                                                                                                                                                         | 2400 |
| 284 | 1389 | CC[C@H]1OC(=O)[C@H](C)C(=O)[C@H](C)[C@@H](O[C@@H]2O[C@H](C)C[C@H](N(C)Cc3cccc3-                                                                                                                                     | 2450 |

|     |      |                                                                                                                                                                                                                           |      |
|-----|------|---------------------------------------------------------------------------------------------------------------------------------------------------------------------------------------------------------------------------|------|
|     |      | c3cn(CCCCCC(=O)NO)nn3)[C@H]2O)[C@@](C)(OC)C[C@@H](C)C2=NCCN3C(=O)O[C@@]1(C)[C@H]3[C@H]2C                                                                                                                                  |      |
| 285 | 1394 | C#CCN(C)CCCOc1cc(NC(=O)CCCCCCCC(=O)NO)ccc1Cl                                                                                                                                                                              | 2480 |
| 286 | 1399 | Cc1ccc2c(=O)n(Cc3ccccc3)c(=O)n(Cc3ccc(C(=O)NO)cc3)c2c1                                                                                                                                                                    | 2521 |
| 287 | 1404 | COc1ccc(-c2ncc/C=C/C(=O)NO)s2)c(OC)c1OC                                                                                                                                                                                   | 2560 |
| 288 | 1409 | CCc1c2c(nc3ccc(OCc4cn(CCCCCC(=O)NO)nn4)cc13)-c1cc3c(c(=O)n1C2)COC(=O)[C@]3(O)CC                                                                                                                                           | 2599 |
| 289 | 1414 | O=C(NO)c1ccc2c(c1)CC(NC(=O)c1cccc(C(F)(F)F)c1)CN2                                                                                                                                                                         | 2670 |
| 290 | 1419 | CC(C)C[C@H]1CC(=O)N[C@@H](C)C(=O)N[C@@H](CCCCC(N)=O)C(=O)N[C@@H](Cc2c[nH]c3ccccc23)C(=O)N1                                                                                                                                | 2700 |
| 291 | 1424 | O=C(CCCCCC(=O)Nc1cccc(-n2cc(C3CCCC3)nn2)c1)NO                                                                                                                                                                             | 2750 |
| 292 | 1429 | O=C(CCCCCC(=O)Nc1cccc(-c2cn(-c3ccccc3)nn2)c1)NO                                                                                                                                                                           | 2780 |
| 293 | 1434 | O=C(NO)c1ccc(Cn2c3c(c4cc(F)ccc42)CSCC3)cc1                                                                                                                                                                                | 2800 |
| 294 | 1439 | COc1cccc(C(=O)NC2CNc3ccc(C(=O)NO)cc3C2)c1                                                                                                                                                                                 | 2810 |
| 295 | 1444 | Nc1ccc(-c2cc(C(=O)NCCCC(=O)NO)no2)cc1                                                                                                                                                                                     | 2830 |
| 296 | 1449 | CCC(=O)CCCC[C@H](NC(=O)C1=NOC2(CCN(C)CC2)C1)c1ncc(-c2cc3ccccc3nc2OC)[nH]1                                                                                                                                                 | 2885 |
| 297 | 1454 | CCC(=O)CCCC[C@H](NC(=O)[C@H]1CC12CCN(CC)CC2)c1ncc(-c2ccc3ccncc3c2)[nH]1                                                                                                                                                   | 2900 |
| 298 | 1459 | CC(C)c1cc(C(=O)N2CCc3cc(NC(=O)CCCC(=O)NO)ccc32)c(O)cc1O                                                                                                                                                                   | 2940 |
| 299 | 1464 | CCCN(C(=O)c1ccc(NC(=O)Cc2ccccc2)cc1                                                                                                                                                                                       | 2991 |
| 300 | 1469 | CCCCNC(=O)[C@@H]1Cc2ccc(OCC(=O)NO)cc2CN1C(=O)OC(C)(C)C                                                                                                                                                                    | 3020 |
| 301 | 1474 | O=C(NO)c1ccc(CCN2C(=O)c3ccccc4c(N5CCOCC5)ccc(c34)C2=O)cc1                                                                                                                                                                 | 3050 |
| 302 | 1479 | O=C(NO)c1ccc(CN2c3ccccc3Sc3ccnnc32)cc1                                                                                                                                                                                    | 3100 |
| 303 | 1484 | O=C(CCCCOc1cccc(-c2nnc(-c3ccccc3)s2)c1)NO                                                                                                                                                                                 | 3112 |
| 304 | 2065 | O=C(CCCCCC1nc(-c2ccc([N+](=O)[O-])cc2)no1)C(F)(F)F                                                                                                                                                                        | 3170 |
| 305 | 1489 | Cc1ccc(-c2noc(CCCCCC(=O)C(F)(F)F)n2)cc1                                                                                                                                                                                   | 3190 |
| 306 | 1494 | CC[C@@H]1OC(=O)[C@@H](C)[C@H](O[C@@H]2C[C@@](C)(OC)[C@@](O)(CN(C)C)[C@@H](C)O2)[C@H](C)[C@H](O[C@@H]2O[C@@H](C)C[C@H](N(C)Cc3ccc(-c4cn(CCCCC(=O)NO)nn4)cc3)[C@H]2O)[C@@](C)(OC)C[C@H](C)C(=O)[C@@H](C)[C@@H](O)[C@@]1(C)O | 3200 |
| 307 | 1499 | CC(C)(C)Oc1ccc(C[C@@H]2N=C(c3ccccc3)c3ccccc3N(CCCCC(=O)NO)C2=O)cc1                                                                                                                                                        | 3300 |
| 308 | 1504 | CCC(=O)CCCC[C@H](NC(=O)[C@H]1C[C@@]12CCN(C)C2)c1ncc(-c2cc3ccccc3nc2OC)[nH]1                                                                                                                                               | 3309 |
| 309 | 1509 | CCC(=O)CCCC[C@H](NC(=O)[C@H]1CC12CCN(C)CC2)c1ncc(-c2cc3ccccc3nc2OC)[nH]1                                                                                                                                                  | 3379 |
| 310 | 1514 | CC(C)c1cc(C(=O)N(C)c2ccc(NC(=O)CCCCCCCC(=O)NO)cc2)c(O)cc1O                                                                                                                                                                | 3410 |
| 311 | 1519 | CC(C)[C@@H]1NC(=O)[C@]2(C)CSC(=N2)c2csc(n2)CNC(=O)C[C@@H]/C=C/CCC(=O)NO)OC1=O                                                                                                                                             | 3500 |
| 312 | 1524 | C/C=C1\NC(=O)c2csc(n2)CNC(=O)C[C@@H]/(C=C/CCS)OC(=O)[C@H](C(C)C)NC1=O                                                                                                                                                     | 3550 |
| 313 | 1529 | CS(=O)(=O)N[C@@H](Cc1ccc(OCc2ccccc2)cc1)C(=O)NO                                                                                                                                                                           | 3600 |
| 314 | 1534 | O=C(CCCCCC1nc(-c2ccccc2Cl)no1)NO                                                                                                                                                                                          | 3650 |
| 315 | 1539 | O=C(CCCCCN(C(=O)c1cc(-c2ccc(F)cc2)[nH]n1)NO                                                                                                                                                                               | 3710 |
| 316 | 1544 | CC[C@H]1OC(=O)[C@H](C)[C@@H](O)[C@H](C)[C@@H](O[C@@H]2O[C@H](C)C[C@H](N(C)Cc3ccc(-c4cn(CCCCC(=O)NO)nn4)cc3)[C@H]2O)[C@](C)(O)C[C@@H](C)CN(C)[C@H](C)[C@@H](O)[C@]1(C)O                                                    | 3740 |
| 317 | 1549 | COc1ccc(CC(=O)N[C@@H](CCC(=O)O)C(=O)NCc2ccccc2)cc1                                                                                                                                                                        | 3800 |
| 318 | 1554 | COc1cc(C(=O)c2csc(-c3ccc(NC(=O)/C=C/C(=O)NO)cc3)n2)cc(OC)c1OC                                                                                                                                                             | 3900 |
| 319 | 1559 | CCC(=O)CCCC[C@H](NC(=O)[C@H]1CC12CCN(CC)CC2)c1ncc(-c2cc3ccccc3nc2OC)[nH]1                                                                                                                                                 | 3978 |

|     |      |                                                                                                                                                                                                                                                                                                                                 |      |
|-----|------|---------------------------------------------------------------------------------------------------------------------------------------------------------------------------------------------------------------------------------------------------------------------------------------------------------------------------------|------|
| 320 | 1564 | <chem>O=C(NO)c1ccc(-c2cn(CC34CC5CC(CC(C5)C3)C4)nn2)s1</chem>                                                                                                                                                                                                                                                                    | 4000 |
| 321 | 1569 | <chem>CNc1nc(Nc2cnn(CCCCCC(=O)NO)c2)ncc1Cl</chem>                                                                                                                                                                                                                                                                               | 4070 |
| 322 | 1574 | <chem>Nc1ccccc1NC(=O)c1ccc(CNC2=N[C@@H](c3ccccc3)CS2)cc1</chem>                                                                                                                                                                                                                                                                 | 4100 |
| 323 | 1579 | <chem>O=C(CCCCCC(=O)Nc1cccc(-n2cc(-c3ccccc3)nn2)c1)NO</chem>                                                                                                                                                                                                                                                                    | 4180 |
| 324 | 1584 | <chem>O=C(NO)C1[C@H](c2ccccc2)[C@H]1c1ccccc1</chem>                                                                                                                                                                                                                                                                             | 4300 |
| 325 | 1589 | <chem>CC[C@H]1OC(=O)[C@H](C)[C@@H](O)[C@H](C)[C@@H](O[C@@H]2O[C@H](C)C[C@H](N(C)Cc3ccc(-c4cn(CCCCCC(=O)NO)nn4)cc3)[C@H]2O)[C@](C)(OC)C[C@@H](C)C(=O)[C@H](C)[C@@H](O)[C@]1(C)O</chem>                                                                                                                                           | 4420 |
| 326 | 1594 | <chem>CCC(=O)CCCC[C@H](NC(=O)[C@H]1CC12CCN(C)CC2)c1ncc(-c2ccc3c(c2)C2CCC3C2)[nH]1</chem>                                                                                                                                                                                                                                        | 4527 |
| 327 | 1599 | <chem>O=C(NO)c1ccc(/C=C/c2ccnc(-c3ccccc3O)c2)cc1</chem>                                                                                                                                                                                                                                                                         | 4620 |
| 328 | 1604 | <chem>O=C(NO)[C@@H]1[C@H](c2ccccc2)[C@H]1c1ccnc(C2CC2)c1</chem>                                                                                                                                                                                                                                                                 | 4800 |
| 329 | 1609 | <chem>O=C(CCCCc1ccn(Cc2ccc(-n3ccc4ccccc43)cc2)n1)NO</chem>                                                                                                                                                                                                                                                                      | 4918 |
| 330 | 1614 | <chem>COc1nc2ccccc2cc1-c1cnc([C@@H](N)CCCCC(=O)c2cnoc2C)[nH]1</chem>                                                                                                                                                                                                                                                            | 5000 |
| 331 | 1619 | <chem>Nc1ccccc1NC(=O)c1ccc(CSC2=N[C@@H](c3ccccc3)CS2)cc1</chem>                                                                                                                                                                                                                                                                 | 5160 |
| 332 | 1624 | <chem>O=C(CCCCc1ccn(Cc2ccc(-c3ccccc3)cc2)n1)NO</chem>                                                                                                                                                                                                                                                                           | 5238 |
| 333 | 1629 | <chem>CCC(=O)CCCCC(NC(=O)c1cnsc1)c1[nH]c(-c2ccccc2)nc1C(=O)NCCN(C)C</chem>                                                                                                                                                                                                                                                      | 5335 |
| 334 | 1634 | <chem>O=C(CCCCCN(Cc1ccc2ccccc2c1)Cc1ccc2ccccc2c1)NO</chem>                                                                                                                                                                                                                                                                      | 5400 |
| 335 | 1639 | <chem>CCC(=O)CCCC[C@H](NC(=O)[C@H]1CC12CCN(C)CC2)c1ncc(-c2ccc(-c3ccccc3)cc2)[nH]1</chem>                                                                                                                                                                                                                                        | 5500 |
| 336 | 1644 | <chem>CCC(=O)CCCC[C@H](NC(=O)[C@H]1CC12CCN(C)CC2)c1ncc(-c2ccc3c(=O)n(C)ccc3c2)[nH]1</chem>                                                                                                                                                                                                                                      | 5600 |
| 337 | 1649 | <chem>CC(C)(C)OC(=O)Nc1cccc(-c2cc(C(=O)NCCCC(=O)NO)no2)c1</chem>                                                                                                                                                                                                                                                                | 5810 |
| 338 | 1654 | <chem>O=C(CCCCCC(=O)NC[C@H]1O[C@@H]2O[C@H]3[C@H](O)[C@@H](O)[C@@H](O[C@H]4[C@H](O)[C@@H](O)[C@@H](O[C@H]5[C@H](O)[C@@H](O)[C@@H](O[C@H]6[C@H](O)[C@@H](O)[C@@H](O[C@H]7[C@H](O)[C@@H](O)[C@@H](O[C@H]8[C@H](O)[C@@H](O)[C@@H](O[C@H]1[C@H](O)[C@H]2O)[C@@H]8CO)O[C@@H]7CO)O[C@@H]6CO)O[C@@H]5CO)O[C@@H]4CO)O[C@@H]3CO)NO</chem> | 6000 |
| 339 | 1659 | <chem>CS(=O)(=O)Nc1ccc(-c2ccnc(Nc3ccc(N4CCC(C(=O)Nc5ccc(/C=C/C(=O)NO)cc5)CC4)cc3)n2)cc1</chem>                                                                                                                                                                                                                                  | 6065 |
| 340 | 1664 | <chem>C=C(c1cc(OC)c(OC)c(OC)c1)c1ccc2c(c1)cc(/C=C/C(=O)NO)n2C</chem>                                                                                                                                                                                                                                                            | 6200 |
| 341 | 1669 | <chem>CCC(=O)CCCC[C@H](NC(=O)[C@H]1CC12CCN(CC)CC2)c1[nH]c(-c2ccc(F)cc2)nc1C(N)=O</chem>                                                                                                                                                                                                                                         | 6364 |
| 342 | 1674 | <chem>O=C(COc1ccc2cc(/C=C3/SC(=O)NC3=O)ccc2c1)Nc1ccc(F)cc1</chem>                                                                                                                                                                                                                                                               | 6600 |
| 343 | 1679 | <chem>O=C(NO)c1ccc(CN2c3ccccc3[C@@H]3CCCC[C@H]32)cc1</chem>                                                                                                                                                                                                                                                                     | 6700 |
| 344 | 1684 | <chem>O=C(CCCCN1C(=O)CN=C(c2ccccc2)c2ccccc21)NO</chem>                                                                                                                                                                                                                                                                          | 6720 |
| 345 | 1689 | <chem>Cc1[nH]c2cc(O)ccc2c1CCNc1ccc(/C=C/C(N)=O)cc1</chem>                                                                                                                                                                                                                                                                       | 6800 |
| 346 | 1694 | <chem>O=C(/C=C/c1ccc(-c2ccc(O)c(C34CC5CC(CC(C5)C3)C4)c2)cc1)NO</chem>                                                                                                                                                                                                                                                           | 6960 |
| 347 | 1699 | <chem>Cn1c(SCCCCCC(=O)NO)nnc1-c1ccncc1</chem>                                                                                                                                                                                                                                                                                   | 7100 |
| 348 | 1704 | <chem>O=C(COc1ccc2cc(/C=C3/SC(=O)NC3=O)ccc2c1)Nc1cccc(F)n1</chem>                                                                                                                                                                                                                                                               | 7200 |
| 349 | 2070 | <chem>[N-]=[N+]=NCc1cc(COc2ccc(NC(=O)CCCCC(=O)NO)cc2)cc(N=[N+]=[N-])c1</chem>                                                                                                                                                                                                                                                   | 7340 |
| 350 | 1709 | <chem>Cc1cc(C)cc(C(=O)N(CCCCCC(=O)NO)CC(=O)NC2CCCC2)c1</chem>                                                                                                                                                                                                                                                                   | 7400 |
| 351 | 1714 | <chem>COc1cc(C(=O)c2csc(-c3ccc(OCCCCC(=O)Nc4ccccc4N)cc3)n2)cc(OC)c1OC</chem>                                                                                                                                                                                                                                                    | 7490 |
| 352 | 1719 | <chem>COc1cccc(NC(=O)COc2ccc3cc(/C=C4/SC(=O)NC4=O)ccc3c2)c1</chem>                                                                                                                                                                                                                                                              | 7600 |
| 353 | 1724 | <chem>COc1ccc(Oc2ccc3nc(/C=C/C(=O)NO)ccc3c2)cc1</chem>                                                                                                                                                                                                                                                                          | 7750 |
| 354 | 1729 | <chem>O=C(CCCCCONC(=O)c1cnc2ccccc2n1)NO</chem>                                                                                                                                                                                                                                                                                  | 7950 |
| 355 | 1734 | <chem>Nc1ccccc1NC(=O)c1ccc(CNC2=NC[C@H](c3ccccc3)O2)cc1</chem>                                                                                                                                                                                                                                                                  | 8100 |

|     |      |                                                                                                                                                                                                                                     |          |
|-----|------|-------------------------------------------------------------------------------------------------------------------------------------------------------------------------------------------------------------------------------------|----------|
| 356 | 1739 | CN(c1ccc(C(=O)NO)cc1)C1CCN(c2ccccc2)C1=O                                                                                                                                                                                            | 8200     |
| 357 | 1744 | Cc1ccc(-c2noc(CCCCCC(=O)Nc3ccccc3N)n2)cc1                                                                                                                                                                                           | 8390     |
| 358 | 1749 | COc1cc(C(=O)c2csc(-<br>c3ccc(NC(=O)CCCCC(=O)Nc4ccccc4N)cc3)n2)cc(OC)c1OC                                                                                                                                                            | 8500     |
| 359 | 1754 | COc1cc(C(=O)c2csc(-<br>c3ccc(NC(=O)CCCCC(=O)Nc4ccccc4N)cc3)n2)cc(OC)c1OC                                                                                                                                                            | 8740     |
| 360 | 1759 | CCC(=O)CCCC[C@H](NC(=O)[C@H]1CC12CCN(C)CC2)c1ncc(-<br>c2ccc3nn(C)cc3c2)[nH]1                                                                                                                                                        | 8900     |
| 361 | 1764 | O=C(NO)[C@H](Cc1ccccc1)n1nnc(-c2ccccc2)c1C#Cc1ccc(-<br>c2ccccc2)cc1                                                                                                                                                                 | 9100     |
| 362 | 1769 | CN(C)c1ccc(C(=O)N(CC(=O)NCc2ccccc2)Cc2ccc(C(=O)Nc3ccccc3N)cc<br>2)cc1                                                                                                                                                               | 9210     |
| 363 | 1774 | Nc1nc2ncc(CNc3ccc(C(=O)NCCCCCCC(=O)NO)cc3)nc2c(=O)[nH]1                                                                                                                                                                             | 9380     |
| 364 | 1779 | CS(=O)(=O)N[C@@H](Cc1ccc(OCCc2ccccc2)cc1)C(=O)NO                                                                                                                                                                                    | 9500     |
| 365 | 1784 | CCC(=O)CCCC[C@H](NC(=O)[C@H]1CC12CCN(C)CC2)c1ncc(-<br>c2ccc(-c3cccn3)cc2)o1                                                                                                                                                         | 9700     |
| 366 | 1789 | CCC(=O)CCCC[C@H](NC(=O)[C@H]1CC12CCN(C)CC2)c1[nH]c(-<br>c2ccc3nc(C)ccc3c2)nc1C#N                                                                                                                                                    | 9835     |
| 367 | 1794 | O=C1NC(=O)/C(=C/c2ccc(OCC(=O)N3N=C(c4ccccc4)CC3c3ccc(Cl)c(C<br>l)c3)cc2)S1                                                                                                                                                          | 10000    |
| 368 | 1799 | CC[C@@H]1OC(=O)[C@@H](C)[C@H](O[C@H]2C[C@@](C)(OC)[C<br>@](O)(CN(C)Cc3ccc(-<br>c4cn(CCC(=O)NO)nn4)cc3)[C@H](C)O2)[C@H](C)[C@H](O[C@@H]<br>2O[C@H](C)C[C@H](N(C)C)[C@H]2O)[C@@](C)(OC)C[C@H](C)C(=O)<br>[C@@H](C)[C@@H](O)[C@@]1(C)O | 10200    |
| 369 | 1804 | Cc1ccc(C(=O)NCCCCC(=O)Nc2ccccc2N)cc1                                                                                                                                                                                                | 10700    |
| 370 | 1809 | O=C(CCCCCNC(=O)C(O)(O)C(F)(F)F)Nc1ccc(Br)cc1                                                                                                                                                                                        | 11000    |
| 371 | 1814 | CC(=O)c1cc(/C=C/C(=O)NO)n(C)c1                                                                                                                                                                                                      | 11250    |
| 372 | 1819 | O=C(CS)NCCCCn1ccc2cc(Cl)c(Cl)cc21                                                                                                                                                                                                   | 11849.05 |
| 373 | 1824 | O=C(NO)c1csc(-c2ccccc2)n1                                                                                                                                                                                                           | 12120    |
| 374 | 1829 | CCC(=O)CCCC[C@H](NC(=O)[C@H]1CC12CCN(C)CC2)c1[nH]c(-<br>c2ccc3nn(C)cc3c2)nc1C#N                                                                                                                                                     | 12420    |
| 375 | 1834 | Nc1ccccc1NC(=O)c1ccc(CNC2=N[C@H](Cc3ccccc3)CS2)cc1                                                                                                                                                                                  | 12700    |
| 376 | 1839 | S=C1Sc2ccc(Cl)cc2C2=NCCN12                                                                                                                                                                                                          | 13000    |
| 377 | 1844 | CCC(=O)CCCC[C@H](NC(=O)[C@H]1CC12CCN(C)CC2)c1ncc(-<br>c2ccc3ncccc3c2)[nH]1                                                                                                                                                          | 13000    |
| 378 | 1849 | O=C(NO)c1cccc2ccccc12                                                                                                                                                                                                               | 14000    |
| 379 | 1854 | CCCCCCCC(=O)SCC/C=C/[C@@H]1CC(=O)N[C@H](C(C)C)C(=O)N[C<br>@H](C)C(=O)N[C@H](C(C)C)C(=O)NCC(=O)O1                                                                                                                                    | 14300    |
| 380 | 1859 | CCC(=O)CCCC[C@H](NC(=O)C1CN(C)C1)c1ncc(-c2ccccc2)[nH]1                                                                                                                                                                              | 14950    |
| 381 | 1864 | CC12CC3CC(C)(C1)CC(NC1ccc(NC4ccc(C(=O)NO)cc4)cc1)(C3)C2                                                                                                                                                                             | 15300    |
| 382 | 1869 | O=C(NO)c1cnc(NC2(c3ccccc3)CCC(F)(F)CC2)nc1                                                                                                                                                                                          | 16000    |
| 383 | 1874 | C[C@H]1CN(c2ccc(C(=O)Nc3ccccc3N)cn2)CCN1C(=O)OCc1ccccc1                                                                                                                                                                             | 16720    |
| 384 | 1879 | CC(Cc1ccc(NS(=O)(=O)c2ccccc2)cc1)CC(=O)NO                                                                                                                                                                                           | 17000    |
| 385 | 1884 | CN(C)c1ccc(C(=O)NCCCCCNC(=O)CS)cc1                                                                                                                                                                                                  | 19100    |
| 386 | 1889 | CC(C)[C@@H]1N=C(c2ccccc2)c2ccccc2N(CCCCC(=O)NO)C1=O                                                                                                                                                                                 | 19830    |
| 387 | 1894 | O=C(NO)c1noc(-c2ccc(Br)cc2)n1                                                                                                                                                                                                       | 20040    |
| 388 | 1899 | O=C(CCCCCNC(=O)C(O)(O)C(F)(F)F)Nc1ncc(-c2ccccc2)s1                                                                                                                                                                                  | 21000    |
| 389 | 1904 | CC(C)(C)OC(=O)NCCCC[C@@H]1N=C(c2ccccc2)c2ccccc2N(CCCCC(=O)<br>NO)C1=O                                                                                                                                                               | 21790    |
| 390 | 1909 | O=C(NO)c1ccc(NC2CCN(c3ccc(Cl)cc3)C2=O)c(Cl)c1                                                                                                                                                                                       | 22400    |
| 391 | 1914 | C[C@@]12Nc3ccccc3[C@]1(O)CCN2Cc1ccc(/C=C/C(N)=O)cc1                                                                                                                                                                                 | 23000    |
| 392 | 1919 | C[C@H](NS(=O)(=O)c1cccc(C(=O)NO)c1)C(=O)Nc1ccccc1                                                                                                                                                                                   | 24200    |
| 393 | 1924 | CCCC(=O)NO                                                                                                                                                                                                                          | 26000    |
| 394 | 1929 | CCC(=O)CCCC[C@H](NC(=O)[C@H]1CC12CCN(CC)CC2)c1ncc(-                                                                                                                                                                                 | 27000    |

|     |      |                                                                  |          |
|-----|------|------------------------------------------------------------------|----------|
|     |      | c2cc3cn(C)nc3cc2OC)o1                                            |          |
| 395 | 1934 | O=C(NO)c1ccc(NC(=S)N/N=C/c2ccccc2)cc1                            | 27600    |
| 396 | 1939 | O=C1NC(=O)/C(=C\C2ccc(OCC(=O)N3N=C(c4ccccc4)CC3c3ccccc3Cl)cc2)S1 | 29000    |
| 397 | 1944 | Cn1c(SCc2ccc(C(=O)NO)cc2)nnc1-c1ccncc1                           | 29760    |
| 398 | 1949 | COC1ccc(-c2ccc(/C=C/C=C/C(=O)NO)cc2)cc1C12CC3CC(CC(C3)C1)C2      | 30600    |
| 399 | 1954 | Cc1ccc(C2CC(c3ccccc3)=NN2C(=O)COc2ccc(/C=C3/SC(=O)NC3=O)cc2)cc1  | 31000    |
| 400 | 1959 | Cc1ccc(-c2nc(C(=O)NO)co2)cc1                                     | 33890    |
| 401 | 1964 | O=C(NO)c1csc(Cc2ccccc2)n1                                        | 35000    |
| 402 | 1969 | CC(=O)N[C@@H](Cc1ccc(OCC2ccccc2)cc1)C(=O)O                       | 36900    |
| 403 | 2075 | COC(=O)CCCCC(=O)Nc1ccc(OCC2cc(CN=[N+]=[N-])cc(N=[N+]=[N-])c2)cc1 | 37400    |
| 404 | 1974 | CCCC(CCC)C(=O)NO                                                 | 39000    |
| 405 | 1979 | Cc1ccc(S(=O)(=O)N[C@@H](Cc2ccc(OCC3ccccc3)cc2)C(=O)NO)cc1        | 42400    |
| 406 | 1984 | COc1ccc(NC(=O)c2ccc(CNC(=O)OCC3ccccc3)cc2)c(N)c1                 | 44000    |
| 407 | 1989 | COc1ccc(NC(=O)CCCCCNC(=O)C(O)(O)C(F)(F)F)cc1                     | 51000    |
| 408 | 1994 | Cc1cc(C)cc(COC2ccc(NC(=O)CCCCC(=O)OC(C)(C)C)cc2)c1               | 53200    |
| 409 | 1999 | Nc1ccccc1NC(=O)c1ccc(CNC2=N[C@@H](Cc3ccccc3)CO2)cc1              | 63000    |
| 410 | 2004 | Nc1ccccc1NC(=O)CCc1ccc(N(CCCl)CCl)cc1                            | 75200    |
| 411 | 2009 | Nc1ccccc1NC(=O)c1ccc(CNC2=NC(c3ccc(C(F)(F)F)cc3)CO2)cc1          | 82100    |
| 412 | 2014 | O=C(O)CCc1ccccc1                                                 | 93000    |
| 413 | 2019 | Nc1ccccc1NC(=O)c1ccc(CNC2=N[C@@H](c3ccccc3)CO2)cc1               | 111000   |
| 414 | 2024 | CCCC(CCC)C(=O)O                                                  | 137778.4 |
| 415 | 2029 | Cc1ccc(S(=O)(=O)N[C@@H](Cc2ccc(OCC3ccccc3)cc2)C(=O)O)cc1         | 504700   |

**Table S3.** Results obtained from the training set of the HDAC8 inhibitors dataset in Recursive Partitioning

| Model Information                                                                   | Confusion Matrix                                                                                                                                                       | ROC Score    | ROC <sub>Cv</sub> |   |   |     |     |   |     |     |                |         |
|-------------------------------------------------------------------------------------|------------------------------------------------------------------------------------------------------------------------------------------------------------------------|--------------|-------------------|---|---|-----|-----|---|-----|-----|----------------|---------|
| <b>Tree 1:</b> 69 leaves<br>Error Rate (training data): 302.93<br>Min alpha: 0      | <table border="1"> <tr><td>Actual\Pred.</td><td>0</td><td>1</td></tr> <tr><td>0</td><td>663</td><td>170</td></tr> <tr><td>1</td><td>133</td><td>697</td></tr> </table> | Actual\Pred. | 0                 | 1 | 0 | 663 | 170 | 1 | 133 | 697 | <b>0.90090</b> | 0.77924 |
| Actual\Pred.                                                                        | 0                                                                                                                                                                      | 1            |                   |   |   |     |     |   |     |     |                |         |
| 0                                                                                   | 663                                                                                                                                                                    | 170          |                   |   |   |     |     |   |     |     |                |         |
| 1                                                                                   | 133                                                                                                                                                                    | 697          |                   |   |   |     |     |   |     |     |                |         |
| <b>Tree 2:</b> 52 leaves<br>Error Rate (training data): 304.92<br>Min alpha: 0.8932 | <table border="1"> <tr><td>Actual\Pred.</td><td>0</td><td>1</td></tr> <tr><td>0</td><td>659</td><td>174</td></tr> <tr><td>1</td><td>131</td><td>699</td></tr> </table> | Actual\Pred. | 0                 | 1 | 0 | 659 | 174 | 1 | 131 | 699 | 0.88141        | 0.77198 |
| Actual\Pred.                                                                        | 0                                                                                                                                                                      | 1            |                   |   |   |     |     |   |     |     |                |         |
| 0                                                                                   | 659                                                                                                                                                                    | 174          |                   |   |   |     |     |   |     |     |                |         |
| 1                                                                                   | 131                                                                                                                                                                    | 699          |                   |   |   |     |     |   |     |     |                |         |
| <b>Tree 3:</b> 43 leaves<br>Error Rate (training data): 316.98<br>Min alpha: 1.786  | <table border="1"> <tr><td>Actual\Pred.</td><td>0</td><td>1</td></tr> <tr><td>0</td><td>668</td><td>165</td></tr> <tr><td>1</td><td>152</td><td>678</td></tr> </table> | Actual\Pred. | 0                 | 1 | 0 | 668 | 165 | 1 | 152 | 678 | 0.86312        | 0.76575 |
| Actual\Pred.                                                                        | 0                                                                                                                                                                      | 1            |                   |   |   |     |     |   |     |     |                |         |
| 0                                                                                   | 668                                                                                                                                                                    | 165          |                   |   |   |     |     |   |     |     |                |         |
| 1                                                                                   | 152                                                                                                                                                                    | 678          |                   |   |   |     |     |   |     |     |                |         |
| <b>Tree 4:</b> 36 leaves<br>Error Rate (training data): 330.89<br>Min alpha: 2.68   | <table border="1"> <tr><td>Actual\Pred.</td><td>0</td><td>1</td></tr> <tr><td>0</td><td>637</td><td>196</td></tr> <tr><td>1</td><td>135</td><td>695</td></tr> </table> | Actual\Pred. | 0                 | 1 | 0 | 637 | 196 | 1 | 135 | 695 | 0.84745        | 0.76449 |
| Actual\Pred.                                                                        | 0                                                                                                                                                                      | 1            |                   |   |   |     |     |   |     |     |                |         |
| 0                                                                                   | 637                                                                                                                                                                    | 196          |                   |   |   |     |     |   |     |     |                |         |
| 1                                                                                   | 135                                                                                                                                                                    | 695          |                   |   |   |     |     |   |     |     |                |         |
| <b>Tree 5:</b> 32 leaves<br>Error Rate (training data): 343.9<br>Min alpha: 3.573   | <table border="1"> <tr><td>Actual\Pred.</td><td>0</td><td>1</td></tr> <tr><td>0</td><td>634</td><td>199</td></tr> <tr><td>1</td><td>145</td><td>685</td></tr> </table> | Actual\Pred. | 0                 | 1 | 0 | 634 | 199 | 1 | 145 | 685 | 0.84011        | 0.76600 |
| Actual\Pred.                                                                        | 0                                                                                                                                                                      | 1            |                   |   |   |     |     |   |     |     |                |         |
| 0                                                                                   | 634                                                                                                                                                                    | 199          |                   |   |   |     |     |   |     |     |                |         |
| 1                                                                                   | 145                                                                                                                                                                    | 685          |                   |   |   |     |     |   |     |     |                |         |
| <b>Tree 6:</b> 24 leaves<br>Error Rate (training data): 375.87<br>Min alpha: 4.466  | <table border="1"> <tr><td>Actual\Pred.</td><td>0</td><td>1</td></tr> <tr><td>0</td><td>608</td><td>225</td></tr> <tr><td>1</td><td>151</td><td>679</td></tr> </table> | Actual\Pred. | 0                 | 1 | 0 | 608 | 225 | 1 | 151 | 679 | 0.81796        | 0.75234 |
| Actual\Pred.                                                                        | 0                                                                                                                                                                      | 1            |                   |   |   |     |     |   |     |     |                |         |
| 0                                                                                   | 608                                                                                                                                                                    | 225          |                   |   |   |     |     |   |     |     |                |         |
| 1                                                                                   | 151                                                                                                                                                                    | 679          |                   |   |   |     |     |   |     |     |                |         |
| <b>Tree 7:</b> 18 leaves<br>Error Rate (training data): 406.83<br>Min alpha: 5.359  | <table border="1"> <tr><td>Actual\Pred.</td><td>0</td><td>1</td></tr> <tr><td>0</td><td>583</td><td>250</td></tr> <tr><td>1</td><td>157</td><td>673</td></tr> </table> | Actual\Pred. | 0                 | 1 | 0 | 583 | 250 | 1 | 157 | 673 | 0.79665        | 0.75245 |
| Actual\Pred.                                                                        | 0                                                                                                                                                                      | 1            |                   |   |   |     |     |   |     |     |                |         |
| 0                                                                                   | 583                                                                                                                                                                    | 250          |                   |   |   |     |     |   |     |     |                |         |
| 1                                                                                   | 157                                                                                                                                                                    | 673          |                   |   |   |     |     |   |     |     |                |         |
| <b>Tree 8:</b> 14 leaves                                                            | <table border="1"> <tr><td>Actual\Pred.</td><td>0</td><td>1</td></tr> </table>                                                                                         | Actual\Pred. | 0                 | 1 |   |     |     |   |     |     |                |         |
| Actual\Pred.                                                                        | 0                                                                                                                                                                      | 1            |                   |   |   |     |     |   |     |     |                |         |

|                                                                                    |              |     |     |         |         |
|------------------------------------------------------------------------------------|--------------|-----|-----|---------|---------|
| Error Rate (training data): 429.83<br>Min alpha: 6.252                             | 0            | 571 | 262 | 0.77584 | 0.74802 |
|                                                                                    | 1            | 168 | 662 |         |         |
| <b>Tree 9:</b> 13 leaves<br>Error Rate (training data): 438.79<br>Min alpha: 10.72 | Actual\Pred. | 0   | 1   | 0.77302 | 0.71599 |
|                                                                                    | 0            | 556 | 277 |         |         |
| <b>Tree 10:</b> 6 leaves<br>Error Rate (training data): 515.5<br>alpha: 11.61      | 1            | 162 | 668 | 0.69954 | 0.67090 |
|                                                                                    | Actual\Pred. | 0   | 1   |         |         |
| <b>Tree 11:</b> 5 leaves<br>Error Rate (training data): 531.46<br>Min alpha: 17.86 | 0            | 435 | 398 | 0.68915 | 0.66136 |
|                                                                                    | 1            | 118 | 712 |         |         |
| <b>Tree 12:</b> 4 leaves<br>Error Rate (training data): 550.53<br>Min alpha: 21.44 | Actual\Pred. | 0   | 1   | 0.67382 | 0.66136 |
|                                                                                    | 0            | 428 | 405 |         |         |
| <b>Tree 13:</b> 3 leaves<br>Error Rate (training data): 582.37<br>Min alpha: 32.16 | 1            | 146 | 684 | 0.65173 | 0.63892 |
|                                                                                    | Actual\Pred. | 0   | 1   |         |         |
| <b>Tree 14:</b> 2 leaves<br>Error Rate (training data): 616.29<br>Min alpha: 35.73 | 0            | 365 | 468 | 0.62941 | 0.63892 |
|                                                                                    | 1            | 115 | 715 |         |         |
|                                                                                    | Actual\Pred. | 0   | 1   |         |         |
|                                                                                    | 0            | 326 | 507 |         |         |
|                                                                                    | 1            | 110 | 720 |         |         |

**Table S4.** Results obtained from the test set of the HDAC8 inhibitors dataset in Recursive Partitioning

| Confusion Matrix |     |     | ROC Score | ROC Rating          |
|------------------|-----|-----|-----------|---------------------|
| Actual\Pred.     | 0   | 1   | 0.83877   | Quality 0.839: Good |
| 0                | 145 | 63  |           |                     |
| 1                | 39  | 168 |           |                     |



| Leaves  | Score |       |     |     |     |     |       |       |       |       |       |       |       |       |       |
|---------|-------|-------|-----|-----|-----|-----|-------|-------|-------|-------|-------|-------|-------|-------|-------|
| 1:20:69 | 0.779 | 0.901 | 697 | 170 | 663 | 133 | 0.818 | 0.804 | 0.840 | 0.796 | 0.821 | 0.818 | 0.636 | 4.115 | 0.201 |
| 2:19:52 | 0.772 | 0.880 | 699 | 174 | 659 | 131 | 0.817 | 0.801 | 0.842 | 0.791 | 0.821 | 0.817 | 0.633 | 4.032 | 0.200 |
| 3:19:43 | 0.766 | 0.863 | 678 | 165 | 668 | 152 | 0.809 | 0.804 | 0.817 | 0.802 | 0.811 | 0.809 | 0.619 | 4.124 | 0.228 |
| 4:15:36 | 0.764 | 0.847 | 695 | 196 | 637 | 135 | 0.801 | 0.780 | 0.837 | 0.765 | 0.808 | 0.801 | 0.602 | 3.559 | 0.213 |
| 5:15:32 | 0.766 | 0.840 | 685 | 199 | 634 | 145 | 0.793 | 0.775 | 0.825 | 0.761 | 0.799 | 0.793 | 0.586 | 3.455 | 0.230 |
| 6:14:24 | 0.752 | 0.818 | 679 | 225 | 608 | 151 | 0.773 | 0.751 | 0.818 | 0.730 | 0.783 | 0.774 | 0.548 | 3.029 | 0.249 |
| 7:12:18 | 0.752 | 0.797 | 673 | 250 | 583 | 157 | 0.755 | 0.729 | 0.811 | 0.700 | 0.768 | 0.755 | 0.511 | 2.702 | 0.270 |
| 8:12:14 | 0.748 | 0.776 | 662 | 262 | 571 | 168 | 0.741 | 0.717 | 0.798 | 0.685 | 0.755 | 0.742 | 0.483 | 2.536 | 0.295 |
| 9:11:13 | 0.716 | 0.773 | 668 | 277 | 556 | 162 | 0.736 | 0.707 | 0.805 | 0.668 | 0.753 | 0.736 | 0.472 | 2.420 | 0.292 |
| 10:4:6  | 0.671 | 0.699 | 712 | 398 | 435 | 118 | 0.690 | 0.641 | 0.858 | 0.522 | 0.734 | 0.690 | 0.380 | 1.795 | 0.272 |
| 11:3:5  | 0.661 | 0.689 | 713 | 415 | 418 | 117 | 0.680 | 0.632 | 0.859 | 0.502 | 0.729 | 0.680 | 0.361 | 1.724 | 0.281 |
| 12:3:4  | 0.661 | 0.674 | 684 | 405 | 428 | 146 | 0.669 | 0.628 | 0.824 | 0.514 | 0.713 | 0.669 | 0.338 | 1.695 | 0.342 |
| 13:2:3  | 0.639 | 0.652 | 715 | 468 | 365 | 115 | 0.649 | 0.604 | 0.862 | 0.438 | 0.710 | 0.650 | 0.300 | 1.533 | 0.316 |
| 14:1:2  | 0.638 | 0.629 | 720 | 507 | 326 | 110 | 0.629 | 0.587 | 0.868 | 0.391 | 0.700 | 0.629 | 0.259 | 1.425 | 0.337 |

Table S6. Statistical results for the RP model test set

| Tree No: | ROC   | TP  | FP  | TN  | FN | Acc   | Pr    | Se    | Sp    | FI    | Auc <sub>b</sub> | $\gamma$ | $\rho^+$ | $\rho^-$ |
|----------|-------|-----|-----|-----|----|-------|-------|-------|-------|-------|------------------|----------|----------|----------|
| Depth:   | Score |     |     |     |    |       |       |       |       |       |                  |          |          |          |
| Leaves   |       |     |     |     |    |       |       |       |       |       |                  |          |          |          |
| 1:20:69  | 0.839 | 168 | 63  | 145 | 39 | 0.754 | 0.727 | 0.812 | 0.697 | 0.767 | 0.754            | 0.508    | 2.680    | 0.270    |
| 2:19:52  | 0.819 | 170 | 59  | 149 | 37 | 0.769 | 0.742 | 0.821 | 0.716 | 0.780 | 0.769            | 0.538    | 2.896    | 0.250    |
| 3:19:43  | 0.804 | 167 | 55  | 153 | 40 | 0.771 | 0.752 | 0.807 | 0.736 | 0.779 | 0.771            | 0.542    | 3.051    | 0.263    |
| 4:15:36  | 0.801 | 171 | 62  | 146 | 36 | 0.764 | 0.734 | 0.826 | 0.702 | 0.777 | 0.764            | 0.528    | 2.771    | 0.2478   |
| 5:15:32  | 0.799 | 167 | 63  | 145 | 40 | 0.752 | 0.726 | 0.807 | 0.697 | 0.764 | 0.752            | 0.504    | 2.664    | 0.277    |
| 6:14:24  | 0.789 | 163 | 64  | 144 | 44 | 0.740 | 0.718 | 0.787 | 0.692 | 0.751 | 0.740            | 0.480    | 2.560    | 0.307    |
| 7:12:18  | 0.768 | 167 | 72  | 136 | 40 | 0.730 | 0.699 | 0.807 | 0.654 | 0.749 | 0.730            | 0.461    | 2.331    | 0.296    |
| 8:12:14  | 0.751 | 168 | 74  | 134 | 39 | 0.728 | 0.694 | 0.812 | 0.644 | 0.748 | 0.727            | 0.456    | 2.281    | 0.292    |
| 9:11:13  | 0.749 | 169 | 77  | 131 | 38 | 0.723 | 0.687 | 0.816 | 0.630 | 0.746 | 0.723            | 0.446    | 2.205    | 0.291    |
| 10:4:6   | 0.697 | 178 | 98  | 110 | 29 | 0.694 | 0.645 | 0.860 | 0.529 | 0.737 | 0.694            | 0.389    | 1.825    | 0.265    |
| 11:3:5   | 0.686 | 178 | 102 | 106 | 29 | 0.684 | 0.636 | 0.860 | 0.510 | 0.731 | 0.685            | 0.370    | 1.754    | 0.275    |
| 12:3:4   | 0.678 | 172 | 99  | 109 | 35 | 0.677 | 0.635 | 0.831 | 0.524 | 0.720 | 0.678            | 0.355    | 1.746    | 0.323    |
| 13:2:3   | 0.659 | 175 | 111 | 97  | 32 | 0.655 | 0.612 | 0.845 | 0.466 | 0.710 | 0.656            | 0.312    | 1.585    | 0.331    |
| 14:1:2   | 0.634 | 177 | 122 | 86  | 30 | 0.634 | 0.592 | 0.855 | 0.413 | 0.700 | 0.634            | 0.269    | 1.46     | 0.351    |

Table S7. Docking scores of the designed molecules (M1-M12)

| COMPOUNDS | FEATURES                                                         | DOCKING SCORES |
|-----------|------------------------------------------------------------------|----------------|
| M1        | Bayesian Fingerprints: G4,G6, G10, G11                           | -5.64          |
| M2        | Bayesian Fingerprint: G7                                         | -6.30          |
| M3        | Bayesian Fingerprints: G8, G9                                    | -2.04          |
| M4        | Bayesian Fingerprints: G12, G13                                  | -5.85          |
| M5        | Bayesian Fingerprint: G14                                        | -5.68          |
| M6        | Bayesian Fingerprint: G19                                        | -7.41          |
| M7        | RP fingerprint: RP-2                                             | -5.92          |
| M8        | RP fingerprint: RP-8                                             | -6.10          |
| M9        | RP fingerprints: RP-19, RP-46                                    | -6.19          |
| M10       | RP fingerprint: RP-29                                            | -7.97          |
| M11       | RP fingerprint: RP-44                                            | -4.54          |
| M12       | RP fingerprint: RP-29, Machine learning: SMR_VSA_3; CSN Analysis | -8.56          |

Table S8. Cytotoxicity profiles of reported selective HDAC8 inhibitors in different cancer cell lines

| Reported selective HDAC8 inhibitors | Cytotoxicity |                       | Journal                  | References                      |
|-------------------------------------|--------------|-----------------------|--------------------------|---------------------------------|
|                                     | Cell lines   | IC <sub>50</sub> (μM) |                          |                                 |
| <b>16b</b>                          | <b>A549</b>  | 7.1                   | <i>J. Med Chem.</i> 2023 | Huang <i>et al.</i> , 2023 [15] |
| <b>16c</b>                          |              | 12.5                  |                          |                                 |
| <b>16e (SZUH280)</b>                |              | 9.6                   |                          |                                 |
| <b>PCI-34051</b>                    |              | 15.8                  |                          |                                 |
| <b>PCI-34051</b>                    | <b>A549</b>  | >33.3                 | <i>J. Med Chem.</i> 2024 | Zhao <i>et al.</i> , 2024 [16]  |
|                                     | HCT116       | 21.9±2.8              |                          |                                 |
| <b>NC-Z16</b>                       | <b>A549</b>  | 32.9±0.4              | <i>J. Med Chem.</i> 2024 | Zhao <i>et al.</i> , 2024 [16]  |
|                                     | HCT116       | 30.1±8.6              |                          |                                 |
| Compound ( <b>6c</b> )              | <b>A549</b>  | 7.1                   | <i>Current study</i>     |                                 |

**Table S9.** Docking scores of the synthesized molecules (**6a-6l**)

| COMPOUNDS | DOCKING SCORES |
|-----------|----------------|
| <b>6a</b> | -7.97          |
| <b>6b</b> | -8.56          |
| <b>6c</b> | <b>-9.02</b>   |
| <b>6d</b> | -7.49          |
| <b>6e</b> | -7.40          |
| <b>6f</b> | -6.48          |
| <b>6g</b> | -8.14          |
| <b>6h</b> | -7.79          |
| <b>6i</b> | -8.85          |
| <b>6j</b> | -8.66          |
| <b>6k</b> | -8.59          |
| <b>6l</b> | -8.58          |

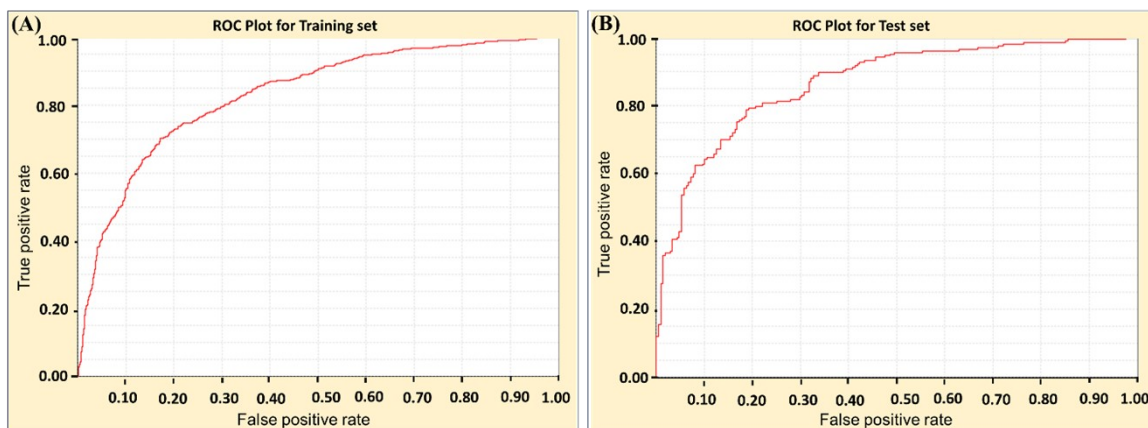

**Fig. S1.** (A) ROC plots illustrating the predictive performance of the Bayesian model for the A) Training set and (B) Test set, showing the relationship between sensitivity (true positive rate) and specificity (false positive rate) to evaluate the model's classification accuracy.

$$\text{Accuracy (Acc)} = \frac{TP + TN}{TP + TN + FP + FN} \quad (1)$$

$$\text{Sensitivity (Se)} = \frac{TP}{TP + FN}; \quad TP = \text{Number of true positives} \\ FN = \text{Number of false negatives} \quad (2)$$

$$\text{Specificity (Sp)} = \frac{TN}{TN + FP}; \quad TN = \text{Number of true negatives} \\ FP = \text{Number of false positives} \quad (4)$$

$$\text{Precision (Pr)} = \frac{TP}{TP + FP} \quad (4)$$

$$F1 = \frac{2TP}{2TP + FP + FN} \quad (5)$$

$$AUC_b = \frac{Se + Sp}{2} \quad (6)$$

$$\rho_+ = \frac{Se}{(1 - Sp)}; \quad \text{where, } \rho_+ > 1: \text{Model is more likely to correctly identify positive instances} \\ \rho_+ = 1: \text{Model has no discriminatory power} \quad (7)$$

$$\rho_- = \frac{(1 - Se)}{Sp}; \quad \text{where, } \rho_- < 1: \text{Model is more likely to correctly identify negative instances} \\ \rho_- = 1: \text{Model has no discriminatory power} \quad (8)$$

**Fig. S2.** Equations 1 to 8 used to calculate different statistical parameters for both training and test sets.

|                                                                   |                                                                   |                                                                   |                                                                    |                                                                    |
|-------------------------------------------------------------------|-------------------------------------------------------------------|-------------------------------------------------------------------|--------------------------------------------------------------------|--------------------------------------------------------------------|
| <br>G1: -1557050162<br>38 out of 38 good<br>Bayesian Score: 0.689 | <br>G2: -567760077<br>38 out of 38 good<br>Bayesian Score: 0.689  | <br>G3: -156292887<br>38 out of 38 good<br>Bayesian Score: 0.689  | <br>G4: 819989073<br>32 out of 32 good<br>Bayesian Score: 0.685    | <br>G5: -829389193<br>32 out of 32 good<br>Bayesian Score: 0.685   |
| <br>G6: -440855790<br>23 out of 23 good<br>Bayesian Score: 0.673  | <br>G7: 969606869<br>20 out of 20 good<br>Bayesian Score: 0.667   | <br>G8: -2072477855<br>18 out of 18 good<br>Bayesian Score: 0.662 | <br>G9: -451853696<br>18 out of 18 good<br>Bayesian Score: 0.662   | <br>G10: -1904402394<br>17 out of 17 good<br>Bayesian Score: 0.659 |
| <br>G11: 18210252<br>34 out of 35 good<br>Bayesian Score: 0.659   | <br>G12: 275055253<br>16 out of 16 good<br>Bayesian Score: 0.656  | <br>G13: 576849494<br>16 out of 16 good<br>Bayesian Score: 0.656  | <br>G14: 832131929<br>16 out of 16 good<br>Bayesian Score: 0.656   | <br>G15: 2082478181<br>15 out of 15 good<br>Bayesian Score: 0.652  |
| <br>G16: -195264467<br>15 out of 15 good<br>Bayesian Score: 0.652 | <br>G17: -173616125<br>15 out of 15 good<br>Bayesian Score: 0.652 | <br>G18: 2043329113<br>15 out of 15 good<br>Bayesian Score: 0.652 | <br>G19: -1849866246<br>14 out of 14 good<br>Bayesian Score: 0.648 | <br>G20: -949321253<br>14 out of 14 good<br>Bayesian Score: 0.648  |

**Figure S3.** Favourable fingerprints associated with potent HDAC8 inhibition identified using Bayesian classification. The Bayesian score represents the frequency and significance of each structural feature within the dataset. Fingerprints shown in green correspond to fingerprints with nitrogen-containing ring system.



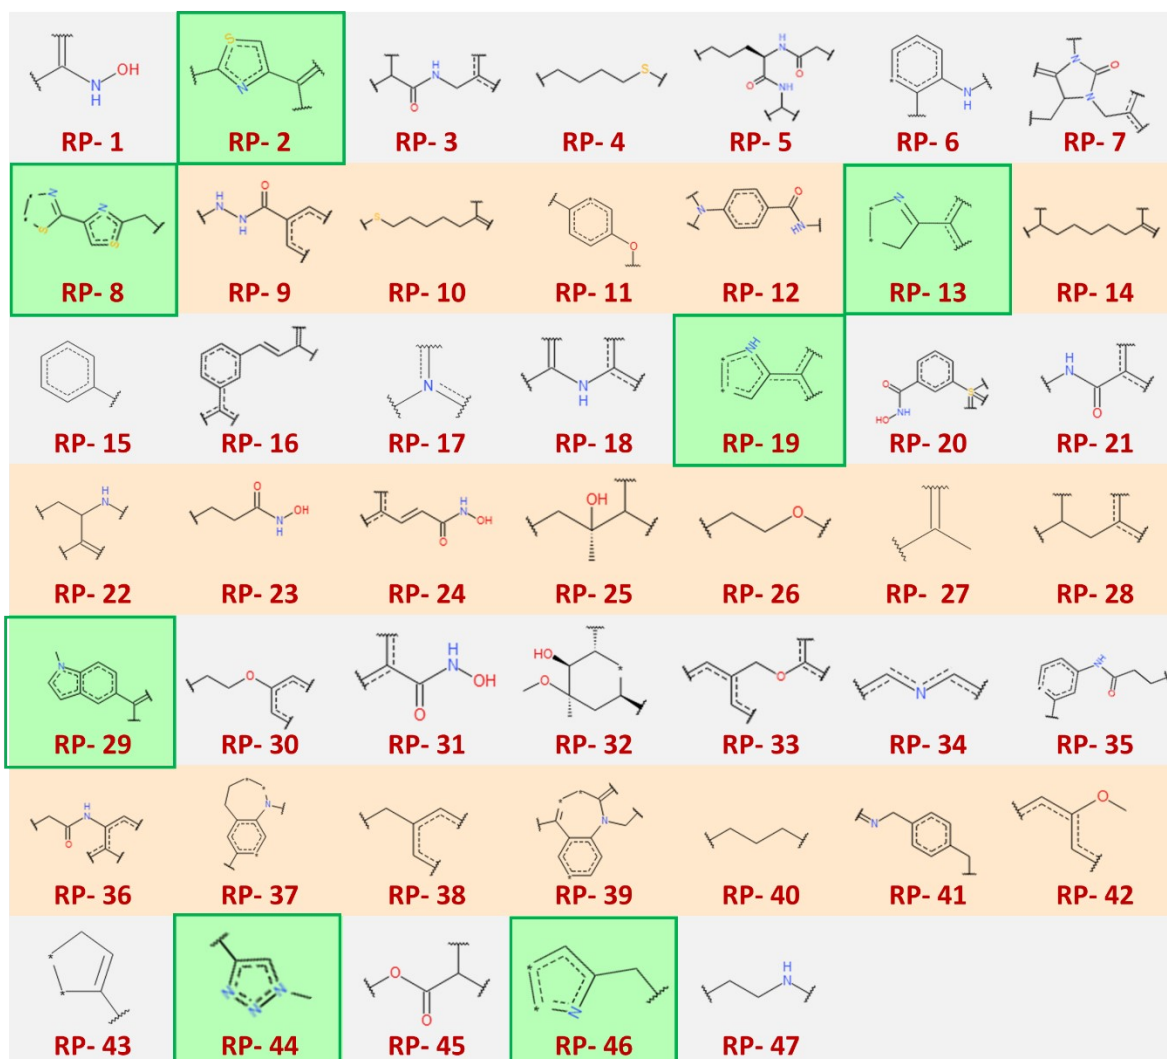

**Fig. S5.** List of 47 favourable fingerprints associated with potent HDAC8 inhibition identified generated by RP modelling study. The fingerprints containing nitrogen containing aromatic heterocycles are highlighted in green.

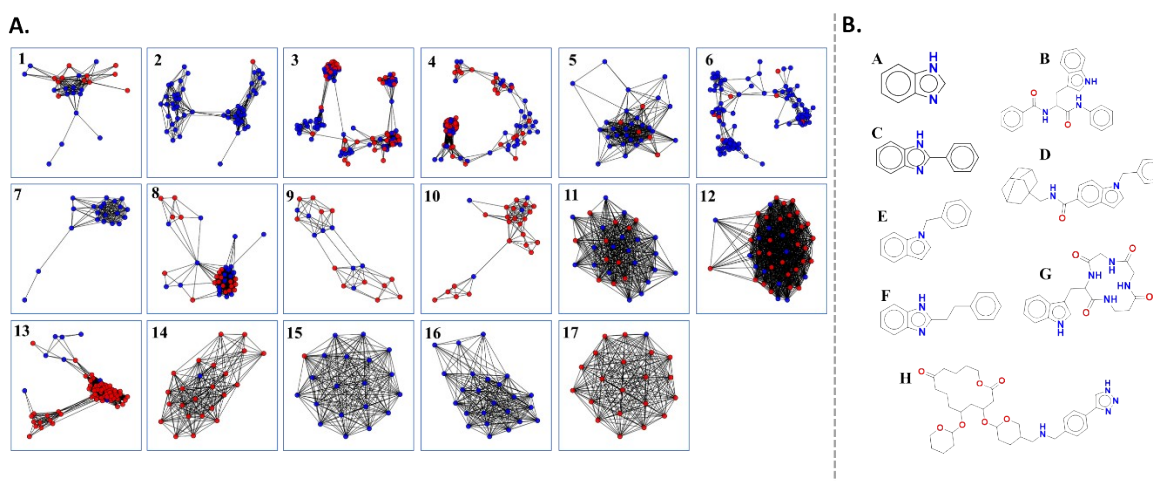

**Fig. S6.** A) A spring layout chemical space network (CSN) depicting 17 subgraphs/clusters of HDAC8 inhibitors, where node colors indicate activity classes and the line styles correspond to Tc-based similarity values. B) 2D representations of the common scaffolds identified in the study.

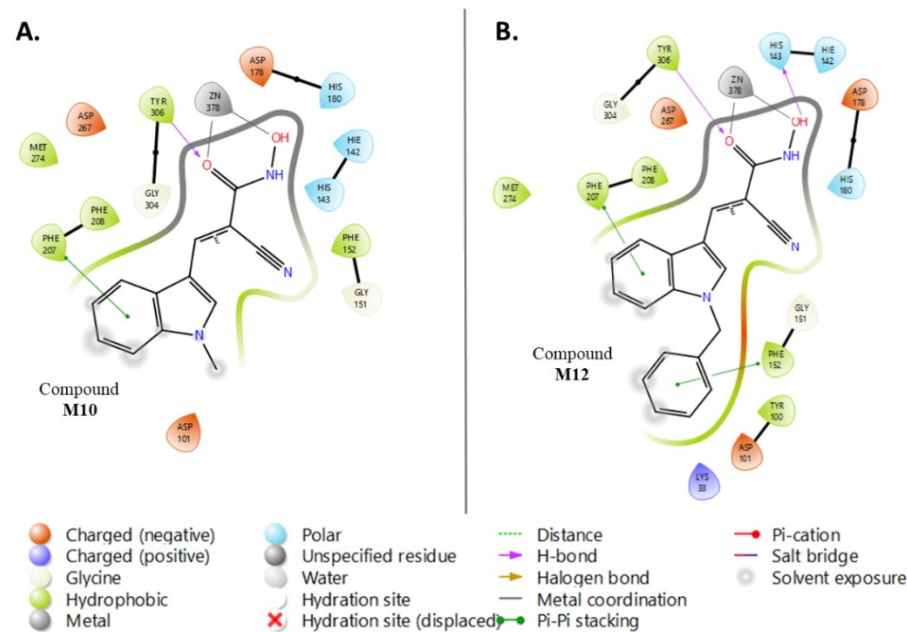

**Fig. S7.** 2D docking interactions of lead fingerprints **A) M10** and **B) M12** obtained from molecular docking studies (PDB: 1T69).

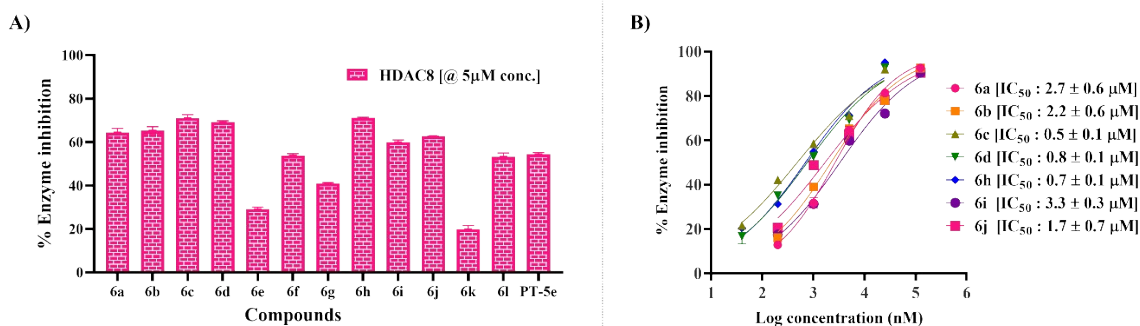

**Fig. S8.** **A)** Bargraph representing the % inhibition of the activity of HDAC8 by the synthesized compounds (**6a-6l**), along with the reference inhibitor **PT-5e** at 5 μM concentration. Data are expressed as mean ± SD (n=2). **B)** Dose inhibition curve of lead molecules (**6a-6d**, **6h-6j**) against HDAC8 generated using a fluorophore-based enzymatic inhibition assay to determine their IC<sub>50</sub> values. Data are presented as mean ± SD (n = 2).

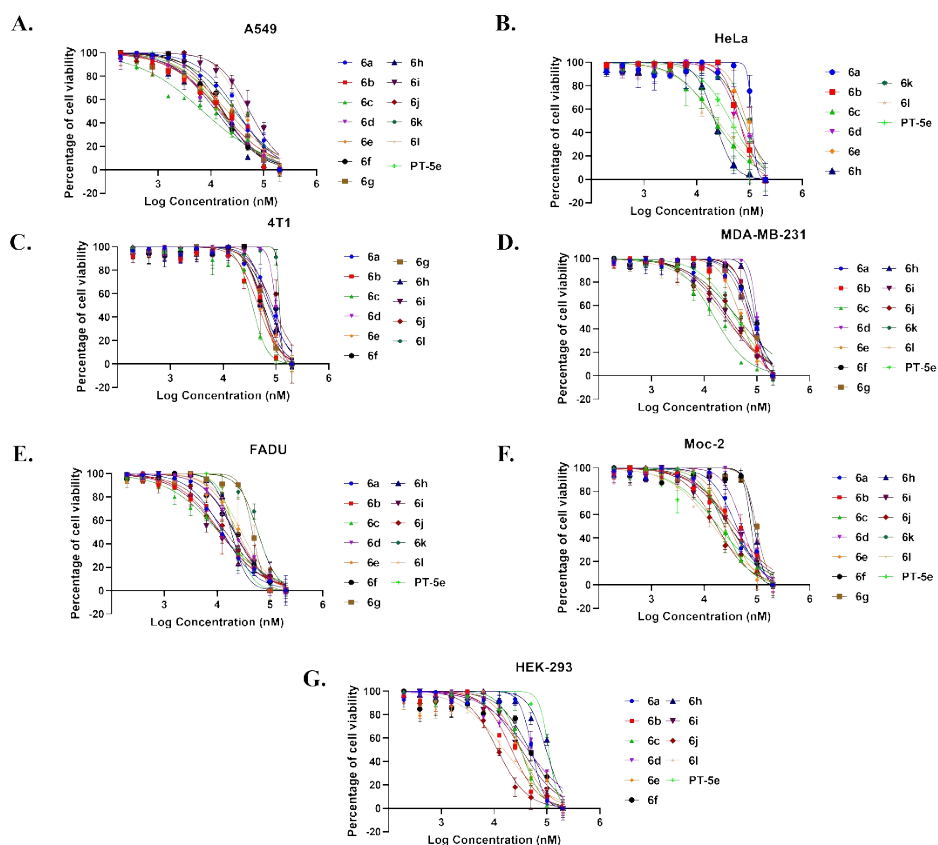

**Fig. S9.** Dose-response curves along with  $IC_{50}$  values of all synthesized compounds, including the reference compound **PT-5e**, were generated across six cancer cell lines: (A) A549 (B) HeLa (C) 4T1 (D) MDA-MB-231 (E) FADU (F) Moc-2 and (G) HEK-293. The compounds were incubated with these cell lines for 72 hours, and cell viability was assessed using the MTT assay. Data are presented as mean  $\pm$  SD ( $n=2$ ) and plotted in a dose-response format.  $IC_{50}$  values were calculated through nonlinear regression analysis using GraphPad Prism 5.

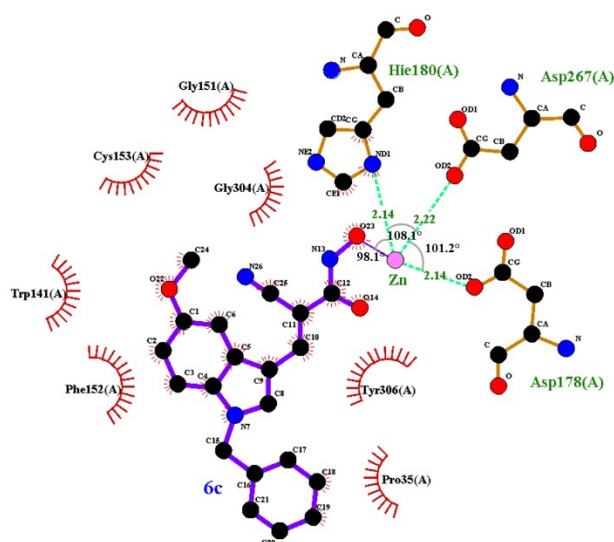

**Fig. S10.** 2D docking interactions of lead molecule **6c** in the active site of HDAC8 (PDB: 1VKG). Green dashed lines indicate polar interactions between the ligand and active site residues, including Asp178(A), Hie180(A), and Asp267(A), with bond distances (ranging from  $\sim 2.14$  to  $2.22$  Å) and bond angles (ranging from  $98.1^\circ$  to  $108^\circ$ ).

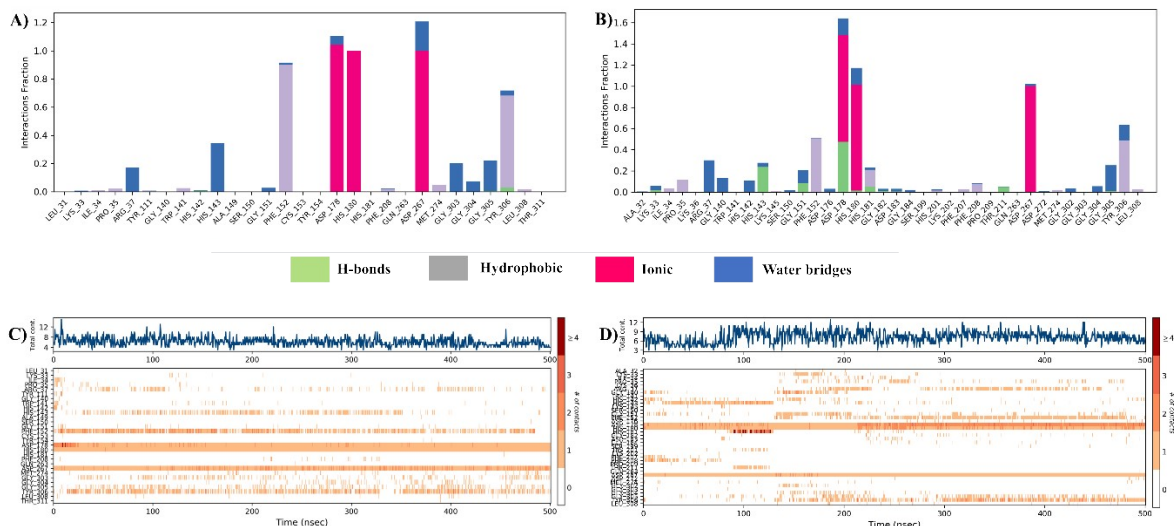

**Fig. S11.** (A) stacked bar chart illustrating the interaction fractions within the HDAC8-6c complex; (B) stacked bar chart showing the interaction fractions within the HDAC8-PT-5e complex; (C) timeline representation of ligand-protein contacts in the HDAC8-6c complex; (D) timeline representation of ligand-protein contacts in the HDAC8-PT-5e complex.

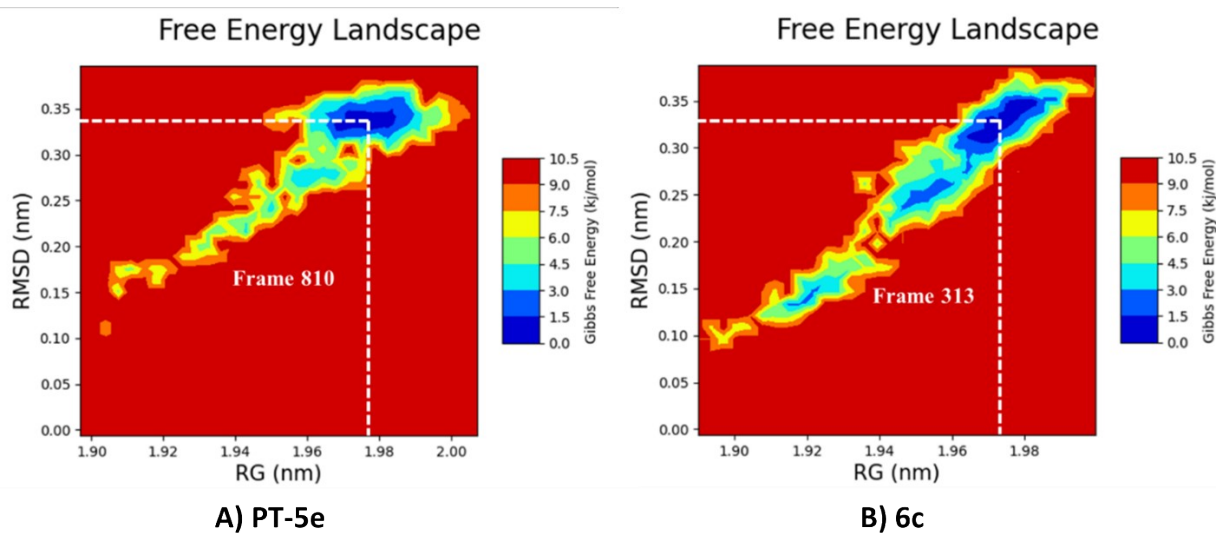

**Fig. S12.** 2D FEL plots of (A) HDAC8-PT-5e and (B) HDAC8-6c complexes

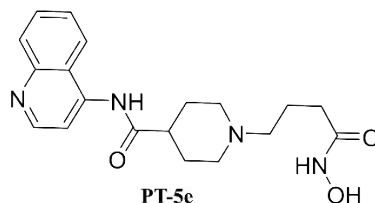

**Fig. S13.** Structure of reference molecule PT-5e

## General methods for synthesis of intermediates

### Synthesis of intermediates (2a-2d)

*Preparation of methyl (E)-2-cyano-3-(1H-indol-3-yl)acrylate (2a.* Methyl cyanoacetate (1.2 equiv, 2.31 mL, 24.79 mmol) was dissolved in MeOH (15 mL), followed by the addition of 0.03 equiv of KI (102.9 mg, 0.62 mmol) and 0.03 equiv of K<sub>2</sub>CO<sub>3</sub> (85.69 mg, 0.62 mmol). After stirring for 20 min at room temperature, indole-3-carboxaldehyde (3g, 20.66 mmol) was added, and the reaction was allowed to proceed at RT for 4h. After completion (monitored by TLC), the solvent was removed under reduced pressure, and the residue was extracted with ethyl acetate, washed with water, dried over anhydrous Na<sub>2</sub>SO<sub>4</sub>, and concentrated to afford compound **2a** as a yellow solid in 95% (4.44 g) yield without further purification.

*Preparation of methyl (E)-2-cyano-3-(5-methoxy-1H-indol-3-yl)acrylate (2b.* Following the synthetic procedure of **2a** and adding 5-methoxyindole-3-carbaldehyde (2g, 11.4 mmol), compound **2b** was synthesized as yellow solid with a yield (2.80 g) of 96%.

*Preparation of methyl (E)-2-cyano-3-(2-methyl-1H-indol-3-yl)acrylate (2c.* Following the synthetic procedure of **2a** and adding 2-methylindole-3-carboxaldehyde (2g 12.56 mmol), compound **2c** was synthesized as pale-yellow solid (2.96 g) with a yield of 98%.

*Preparation of methyl (E)-2-cyano-3-(5-nitro-1H-indol-3-yl)acrylate (2d.* Following the synthetic procedure of **2a** and adding 5-nitroindole-3-carboxaldehyde (2g, 10.52 mmol), compound **2d** was synthesized (2.76 g) as brown coloured solid with 97% yield.

### Synthesis of intermediates 3a-3l

Compounds **2a-2b** (1 equiv) was dissolved in ACN (15 ml), after which Cs<sub>2</sub>CO<sub>3</sub> (2 equiv) and methyl/ethyl iodide (1.2 equiv.) were added. The reaction was allowed to proceed at RT for 4h and was monitored by TLC. The crude product was extracted with ethyl acetate and washed with water. The organic phase was separated, dried over anhydrous sodium sulfate, and concentrated under vacuum. The resulting solids (compounds **3a, 3b, 3d, 3f** and **3h**) were obtained with more than 90% yield without further purification. Using the same procedure described above, compounds **2a-2d** were reacted with substituted benzyl bromides (1.2 equiv) in the presence of Cs<sub>2</sub>CO<sub>3</sub> (2 equiv) in acetonitrile to afford compounds **3c, 3e, 3g,** and **3i-3l** in >85% yield without further purification.

### Synthesis of intermediates 4a-4l.

Compound **3a-3l** (1 equiv) were dissolved in THF (5 ml) and treated with 0.5 N LiOH (3 equiv) at RT for 12 h. Upon completion of the reaction (monitored by TLC), THF was removed under reduced pressure and the resulting residue was dissolved in EtOAc and extracted with water. The aqueous layer was acidified with conc. HCl (pH 2-3) to precipitate the product, which was extracted with ethyl acetate, dried over anhydrous Na<sub>2</sub>SO<sub>4</sub>, and concentrated to afford crude compounds **4a-4l**.

## Synthesis of intermediates 5a-5l

The acid derivatives **4a-4l** were dissolved in DMF (5 ml) in a clean, dry round-bottom flask under nitrogen atmosphere followed by the addition of HATU (1.2 equiv) and THP-protected hydroxylamine (1.2 equiv). The mixture was cooled to 0 °C in an ice bath, and DIPEA was added dropwise. After stirring at room temperature for 4-8 h (TLC monitored), the reaction was quenched with ice-cold water and extracted with ethyl acetate. The organic layer was washed with brine, dried over Na<sub>2</sub>SO<sub>4</sub>, and concentrated. The crude product was purified by column chromatography (EtOAc:Hexane, 1.5:8.5) to afford THP-protected hydroxamic acids (**5a-5l**).

*(S,E)*-2-cyano-3-(1-methyl-1H-indol-3-yl)-N-((tetrahydro-2H-pyran-2-yl)oxy)acrylamide (**5a**). Yellow solid; yield: 70%. <sup>1</sup>H NMR (400 MHz, CDCl<sub>3</sub>) δ: 8.92 (s, 1H), 8.65 (s, 1H), 8.36 (s, 1H), 7.85 (dd, J = 6.8, 1.3 Hz, 1H), 7.41 – 7.28 (m, 3H), 5.09 (t, J = 2.8 Hz, 1H), 4.04 (td, J = 10.9, 3.0 Hz, 1H), 3.90 (s, 3H), 3.70 (ddd, J = 11.2, 5.3, 3.9 Hz, 1H), 1.95 – 1.81 (m, 3H), 1.71 – 1.61 (m, 3H).

*(S,E)*-3-(1-benzyl-1H-indol-3-yl)-2-cyano-N-((tetrahydro-2H-pyran-2-yl)oxy)acrylamide (**5b**). Yellow solid; yield: 67%. <sup>1</sup>H NMR (400 MHz, DMSO-d<sub>6</sub>) δ: 11.59 (s, 1H), 8.61 (s, 1H), 8.40 (s, 1H), 7.96 – 7.90 (m, 1H), 7.65 – 7.59 (m, 1H), 7.38 – 7.18 (m, 8H), 5.64 (s, 2H), 4.98 (s, 1H), 4.12 – 4.01 (m, 1H), 3.59 – 3.49 (m, 1H), 1.72 (s, 3H), 1.55 (s, 3H).

*(S,E)*-3-(1-benzyl-5-methoxy-1H-indol-3-yl)-2-cyano-N-((tetrahydro-2H-pyran-2-yl)oxy)acrylamide (**5c**). Yellow solid; yield: 69%. <sup>1</sup>H NMR (400 MHz, DMSO-d<sub>6</sub>) δ: 11.53 (s, 1H), 8.54 (s, 1H), 8.39 (s, 1H), 7.54 – 7.42 (m, 2H), 7.37 – 7.31 (m, 2H), 7.30 – 7.23 (m, 3H), 6.91 (dd, J = 8.9, 2.4 Hz, 1H), 5.59 (s, 2H), 4.98 (s, 1H), 4.12 – 4.04 (m, 1H), 3.82 (s, 3H), 3.57 – 3.48 (m, 1H), 1.72 (t, J = 3.0 Hz, 3H), 1.59 – 1.50 (m, 3H).

*(S,E)*-2-cyano-3-(1-ethyl-5-methoxy-1H-indol-3-yl)-N-((tetrahydro-2H-pyran-2-yl)oxy)acrylamide (**5d**). Maroon solid; yield: 62%. <sup>1</sup>H NMR (400 MHz, DMSO-d<sub>6</sub>) δ: 11.50 (s, 1H), 8.43 (s, 1H), 8.38 (s, 1H), 7.56 (d, J = 8.9 Hz, 1H), 7.45 (d, J = 2.4 Hz, 1H), 6.96 (dd, J = 8.9, 2.4 Hz, 1H), 4.98 (t, J = 2.7 Hz, 1H), 4.34 (q, J = 7.1 Hz, 2H), 4.08 (ddd, J = 12.1, 8.5, 4.0 Hz, 1H), 4.02 (s, 2H), 3.85 (s, 3H), 3.71 (s, 3H), 3.59 – 3.50 (m, 1H), 1.72 (dt, J = 4.3, 2.2 Hz, 3H), 1.55 (d, J = 5.1 Hz, 3H), 1.41 (t, J = 7.2 Hz, 3H).

*(S,E)*-2-cyano-3-(5-methoxy-1-(4-(trifluoromethyl)benzyl)-1H-indol-3-yl)-N-((tetrahydro-2H-pyran-2-yl)oxy)acrylamide (**5e**). Yellow solid; yield: 59%. <sup>1</sup>H NMR (400 MHz, DMSO-d<sub>6</sub>) δ: 11.63 (s, 1H), 8.53 (d, J = 3.2 Hz, 1H), 8.48 (s, 1H), 7.99 – 7.95 (m, 1H), 7.79 – 7.72 (m, 1H), 7.65 – 7.59 (m, 1H), 7.38 – 7.27 (m, 2H), 5.04 (s, 1H), 4.24 – 4.08 (m, 2H), 3.67 – 3.53 (m, 1H), 1.81 – 1.75 (m, 3H), 1.62 (s, 3H).

*(S,E)*-2-cyano-3-(1-ethyl-1H-indol-3-yl)-N-((tetrahydro-2H-pyran-2-yl)oxy)acrylamide (**5f**). Orange solid; yield: 70%. <sup>1</sup>H NMR (400 MHz, DMSO-d<sub>6</sub>) δ: 11.57 (s, 1H), 8.49 (s, 1H), 8.39 (s, 1H), 7.93 (d, J = 7.7 Hz, 1H), 7.67 (d, J = 8.0 Hz, 1H), 7.42 – 7.23 (m, 2H), 4.99 (d, J = 2.8 Hz, 1H), 4.39 (q, J = 7.2 Hz, 2H), 1.72 (s, 3H), 1.55 (q, J = 7.2 Hz, 3H), 1.43 (t, J = 7.2 Hz, 3H).

*(S,E)*-2-cyano-3-(5-methoxy-1-(4-(trifluoromethoxy)benzyl)-1H-indol-3-yl)-N-((tetrahydro-2H-pyran-2-yl)oxy)acrylamide (**5g**). Yellow solid; yield: 68%. <sup>1</sup>H NMR (400 MHz, DMSO-d<sub>6</sub>) δ: 11.55 (s, 1H), 8.56 (s, 1H), 8.40 (s, 1H), 7.50 (d, J = 8.9 Hz, 1H), 7.47 (d, J = 2.4 Hz,

1H), 7.38 – 7.33 (m, 4H), 6.92 (dd, J = 8.9, 2.4 Hz, 1H), 5.65 (s, 2H), 4.99 (d, J = 2.8 Hz, 1H), 4.08 (ddd, J = 12.3, 8.8, 3.8 Hz, 1H), 3.83 (s, 3H), 3.61 – 3.49 (m, 1H), 1.75 – 1.68 (m, 3H), 1.55 (d, J = 5.3 Hz, 3H).

*(S,E)*-2-cyano-3-(5-methoxy-1-methyl-1H-indol-3-yl)-N-((tetrahydro-2H-pyran-2-yl)oxy)acrylamide (**5h**). Brown solid; yield: 67%. <sup>1</sup>H NMR (400 MHz, DMSO-d<sub>6</sub>) δ: 11.56 (s, 1H), 8.44 (s, 1H), 8.43 (s, 1H), 7.57 (d, J = 8.9 Hz, 1H), 7.50 (d, J = 2.3 Hz, 1H), 7.02 (dd, J = 8.9, 2.4 Hz, 1H), 5.03 (s, 1H), 4.13 (td, J = 10.2, 3.9 Hz, 1H), 3.98 (s, 3H), 3.90 (s, 3H), 3.62 – 3.57 (m, 1H), 1.80 – 1.74 (m, 3H), 1.60 (d, J = 5.5 Hz, 3H).

*(S,E)*-2-cyano-3-(2-methyl-1-(4-(trifluoromethoxy)benzyl)-1H-indol-3-yl)-N-((tetrahydro-2H-pyran-2-yl)oxy)acrylamide (**5i**). Green solid; Yield: 59%. <sup>1</sup>H NMR (400 MHz, DMSO-d<sub>6</sub>) δ: 11.61 (s, 1H), 8.38 (s, 1H), 8.07 – 8.01 (m, 1H), 7.65 – 7.60 (m, 1H), 7.40 – 7.37 (m, 2H), 7.33 – 7.27 (m, 2H), 7.25 (s, 2H), 5.68 (s, 2H), 5.06 (d, J = 2.8 Hz, 1H), 4.21 – 4.08 (m, 1H), 3.60 (d, J = 11.3 Hz, 1H), 2.60 (s, 3H), 1.77 (s, 3H), 1.60 (s, 3H).

*(E)*-2-cyano-3-(1-(4-methoxybenzyl)-1H-indol-3-yl)-N-((tetrahydro-2H-pyran-2-yl)oxy)acrylamide (**5j**). Orange coloured solid; yield: 60%. <sup>1</sup>H NMR (400 MHz, DMSO-d<sub>6</sub>) δ: 11.59 (s, 1H), 8.59 (s, 1H), 8.39 (s, 1H), 7.95 – 7.90 (m, 1H), 7.68 – 7.62 (m, 1H), 7.33 – 7.24 (m, 4H), 6.93 – 6.87 (m, 2H), 5.55 (s, 2H), 4.98 (s, 1H), 4.05 (d, J = 11.0 Hz, 1H), 3.71 (s, 3H), 3.59 – 3.51 (m, 1H), 1.72 (s, 2H), 1.55 (d, J = 5.1 Hz, 1H).

*(E)*-2-cyano-3-(1-(4-fluorobenzyl)-2-methyl-1H-indol-3-yl)-N-((tetrahydro-2H-pyran-2-yl)oxy)acrylamide (**5k**). Yellow solid; yield: 65%. <sup>1</sup>H NMR (400 MHz, DMSO-d<sub>6</sub>) δ: 11.62 (s, 1H), 8.37 (s, 1H), 8.07 – 7.98 (m, 1H), 7.67 – 7.58 (m, 1H), 7.30 (tdd, J = 5.8, 4.1, 2.3 Hz, 2H), 7.19 (td, J = 6.7, 2.7 Hz, 4H), 5.62 (s, 2H), 5.05 (t, J = 2.6 Hz, 1H), 4.12 (s, 1H), 3.63 (d, J = 2.3 Hz, 1H), 2.61 (s, 3H), 1.77 (q, J = 2.0 Hz, 3H), 1.64 – 1.57 (m, 3H).

*(E)*-3-(1-benzyl-5-nitro-1H-indol-3-yl)-2-cyano-N-((tetrahydro-2H-pyran-2-yl)oxy)acrylamide (**5l**). Brown solid; yield: 66%. <sup>1</sup>H NMR (400 MHz, DMSO-d<sub>6</sub>) δ: 9.33 (s, 1H), 8.95 (s, 1H), 8.72 (s, 1H), 8.44 (s, 1H), 8.15 (s, 1H), 7.84 (s, 1H), 7.33 (dt, J = 23.5, 7.1 Hz, 4H), 5.99 – 5.38 (m, 2H), 4.96 (d, J = 26.5 Hz, 1H), 4.06 (s, 1H), 3.80 (s, 1H), 1.65 – 1.13 (m, 6H).

## Supporting <sup>1</sup>H NMR spectra of intermediates (5a-5l)

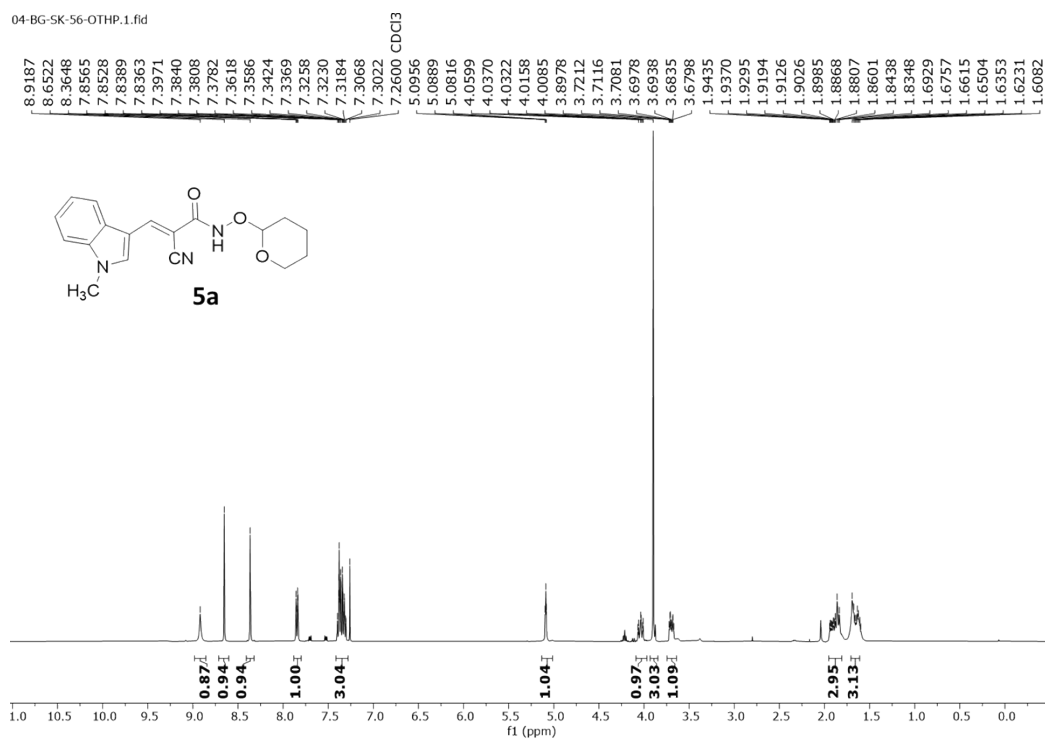

## Supporting Spectra S1: <sup>1</sup>H NMR Spectra for the intermediate 5a.

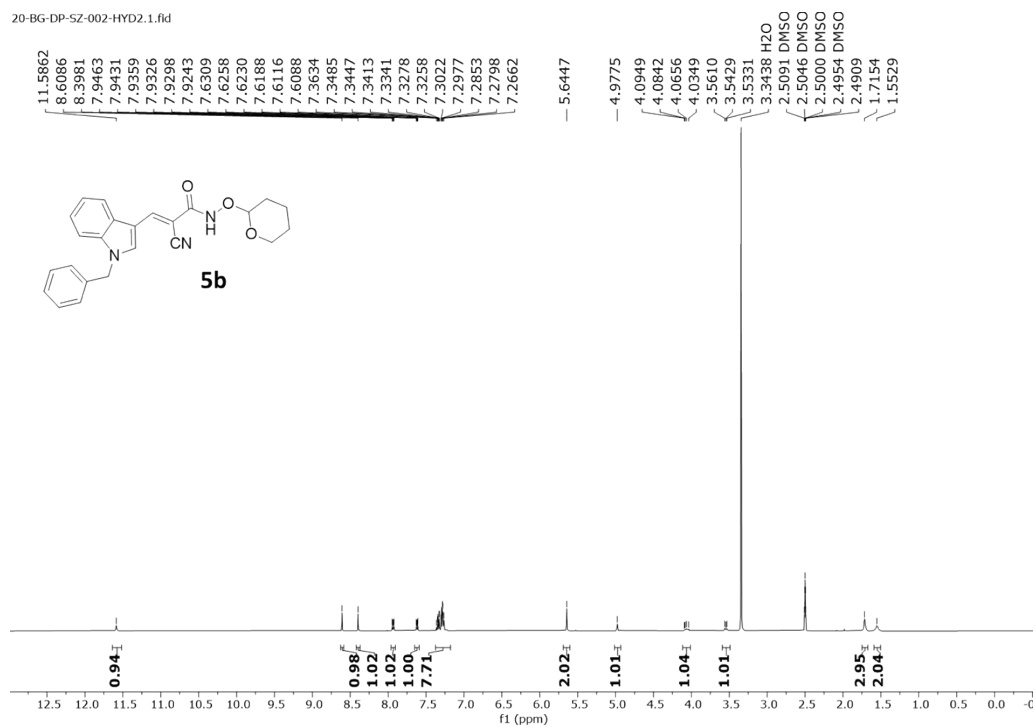

## Supporting Spectra S2: <sup>1</sup>H NMR Spectra for the intermediate 5b.

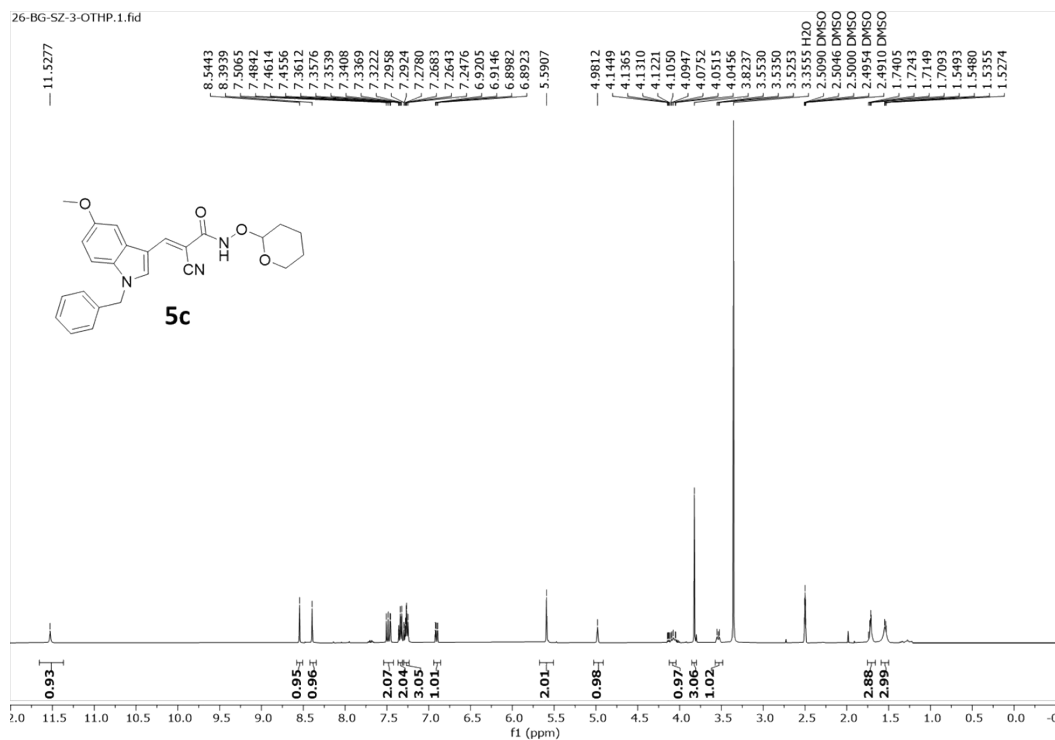

Supporting Spectra S3: <sup>1</sup>H NMR Spectra for the intermediate **5c**.

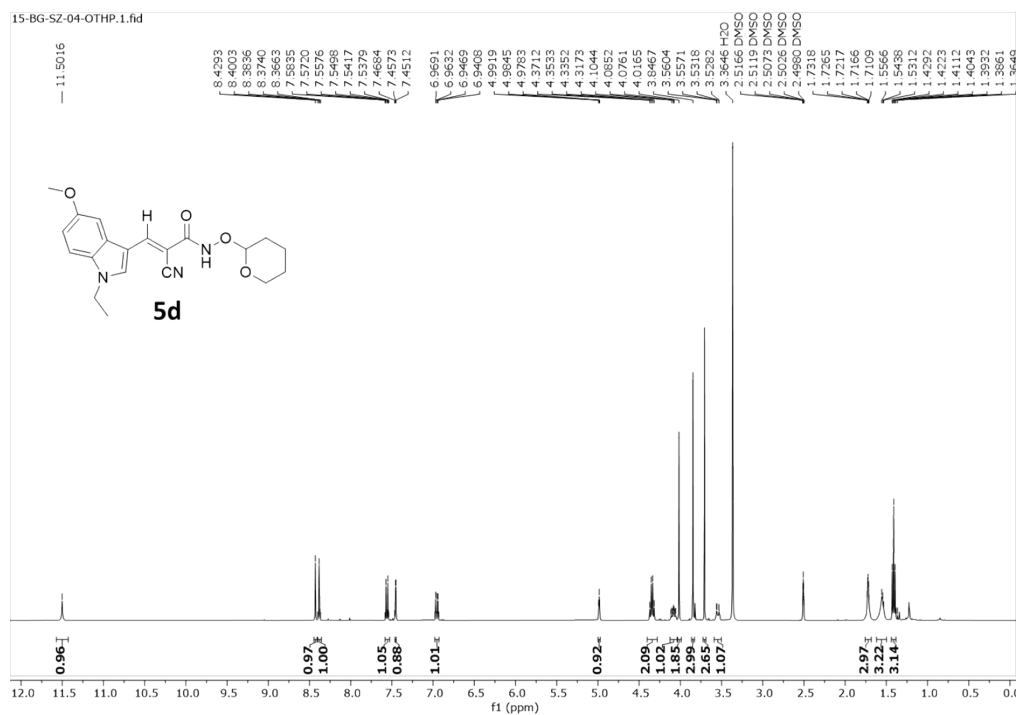

Supporting Spectra S4: <sup>1</sup>H NMR Spectra for the intermediate **5d**.

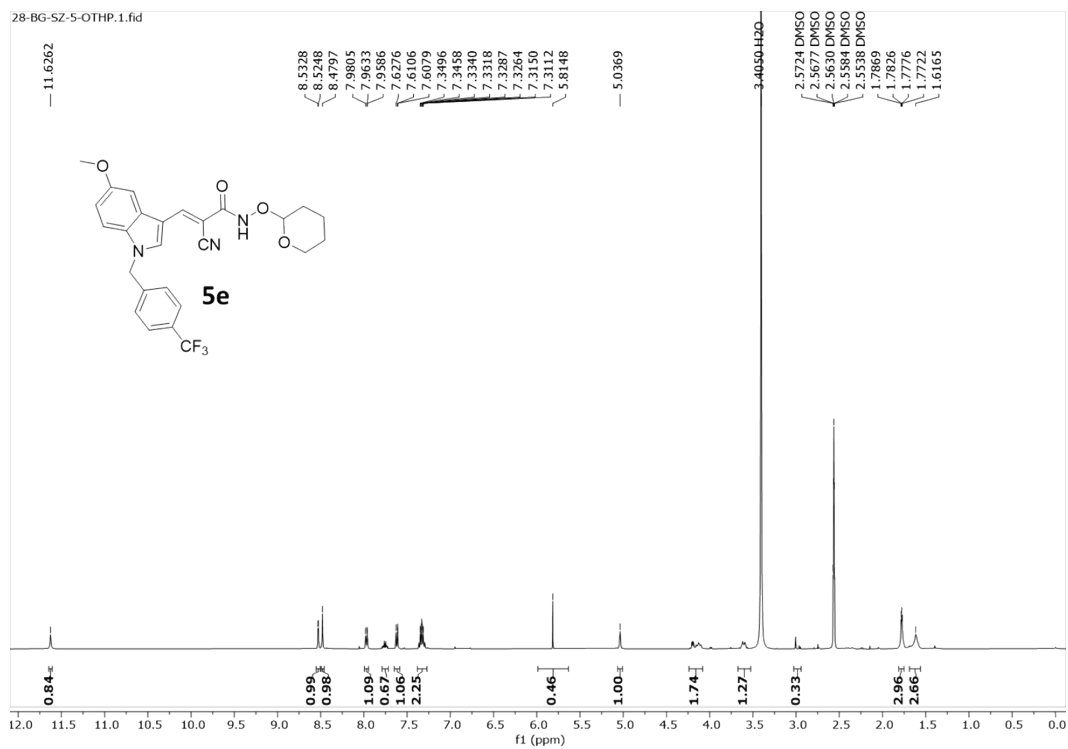

Supporting Spectra S5:  $^1\text{H}$  NMR Spectra for the intermediate **5e**.

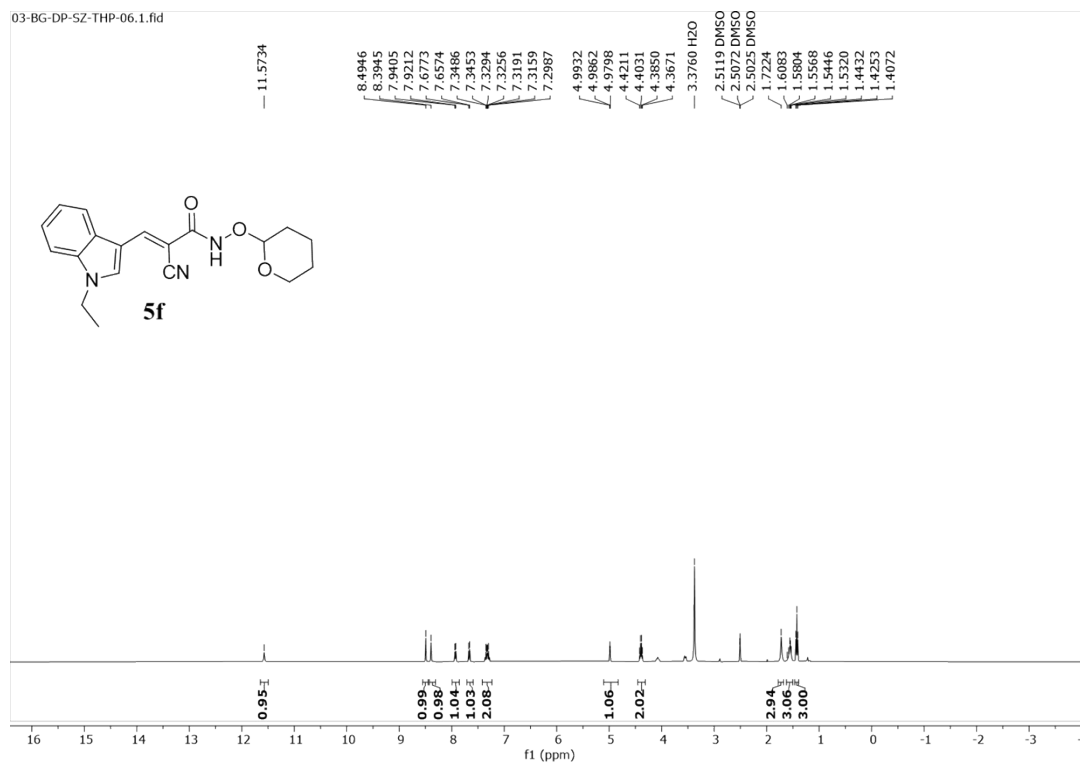

Supporting Spectra S6:  $^1\text{H}$  NMR Spectra for the intermediate **5f**.

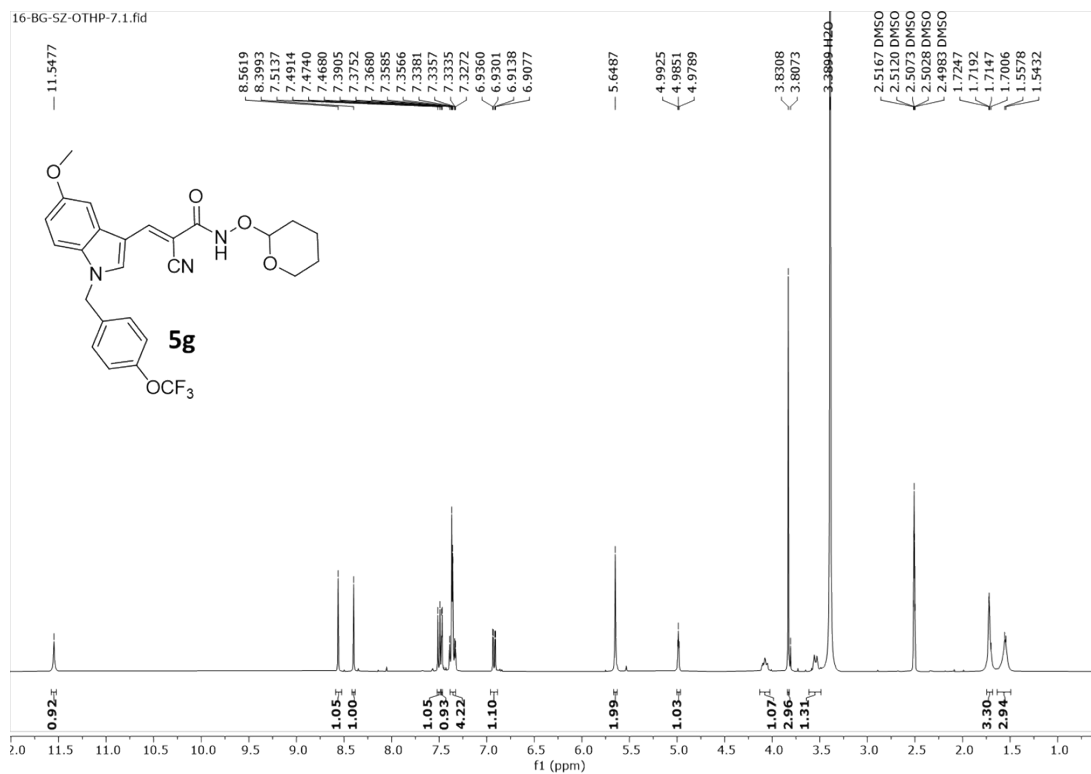

Supporting Spectra S7: <sup>1</sup>H NMR Spectra for the intermediate **5g**.

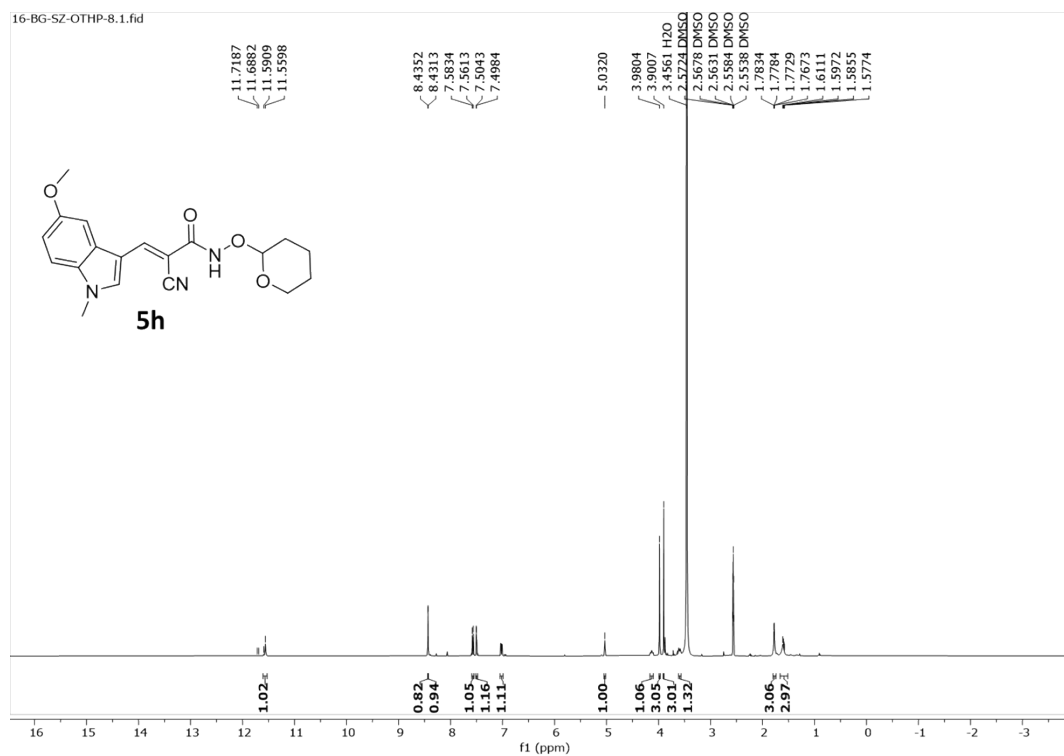

Supporting Spectra S8: <sup>1</sup>H NMR Spectra for the intermediate **5h**.

Supportin

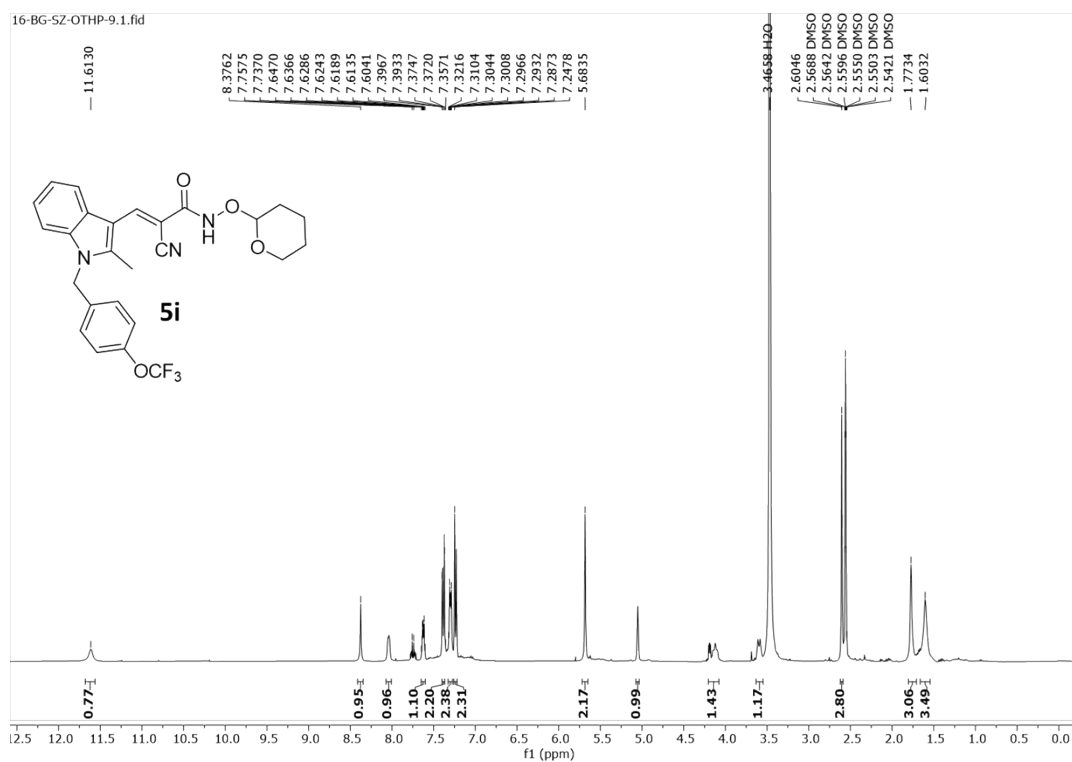

Supporti

ng Spectra S9: <sup>1</sup>H NMR Spectra for the intermediate **5i**.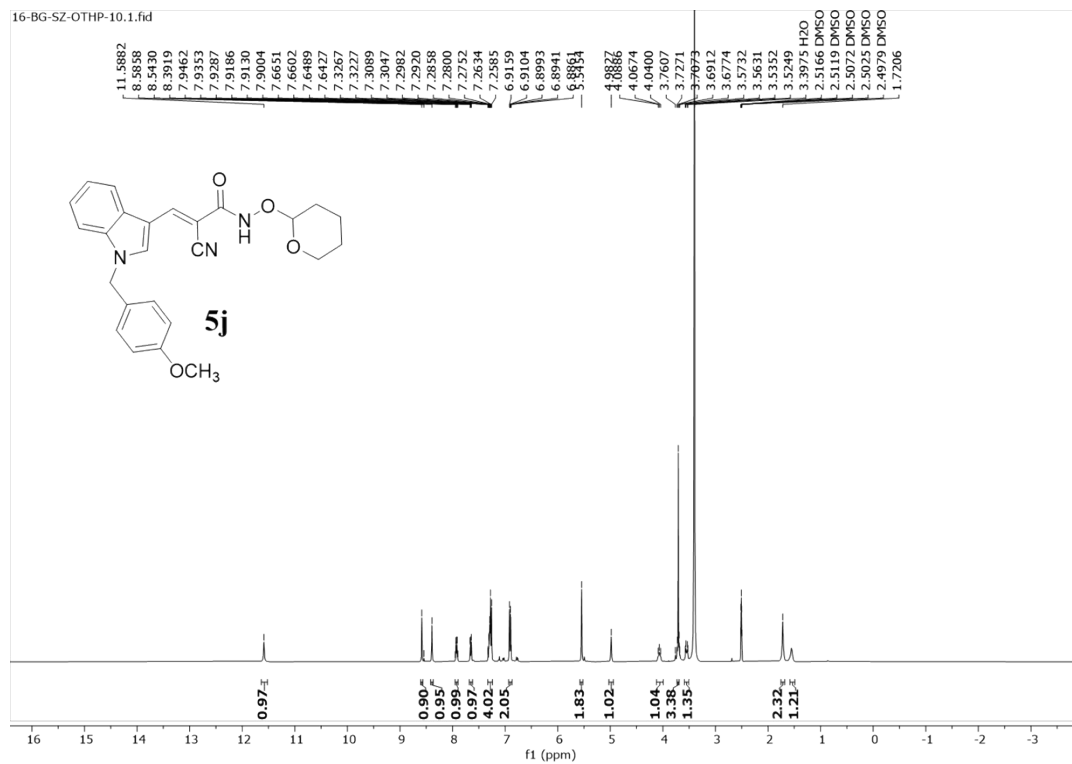Supporting Spectra S10: <sup>1</sup>H NMR Spectra for the intermediate **5j**.

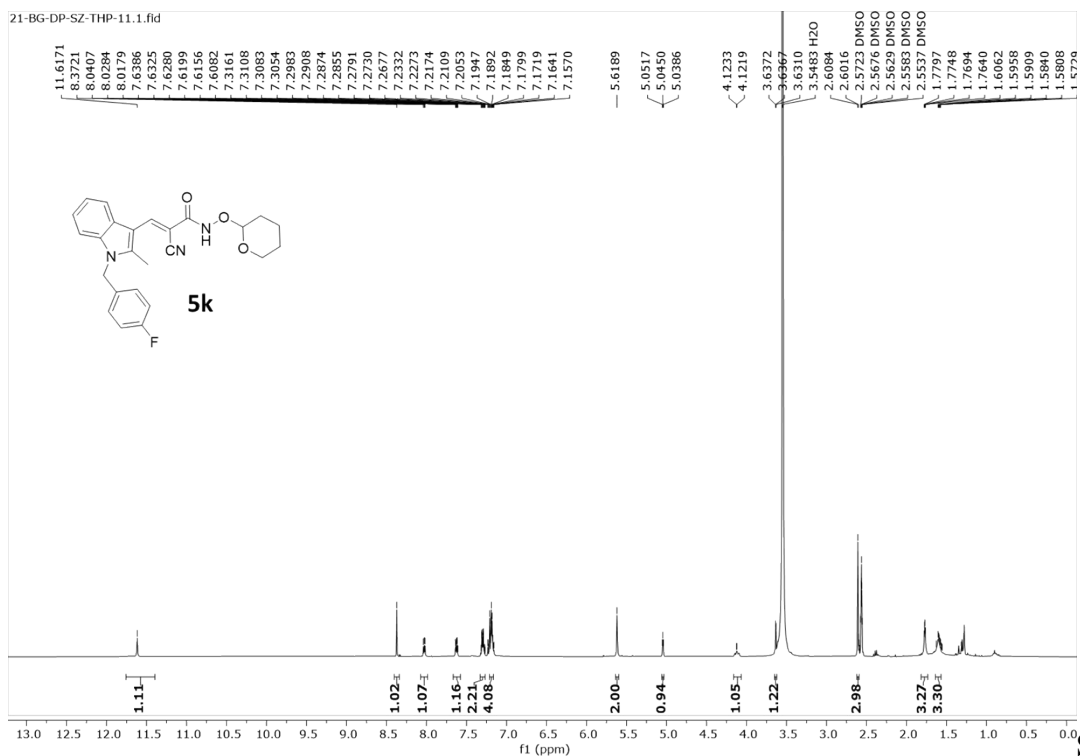Supporting Spectra S11:  $^1\text{H}$  NMR Spectra for the intermediate **5k**.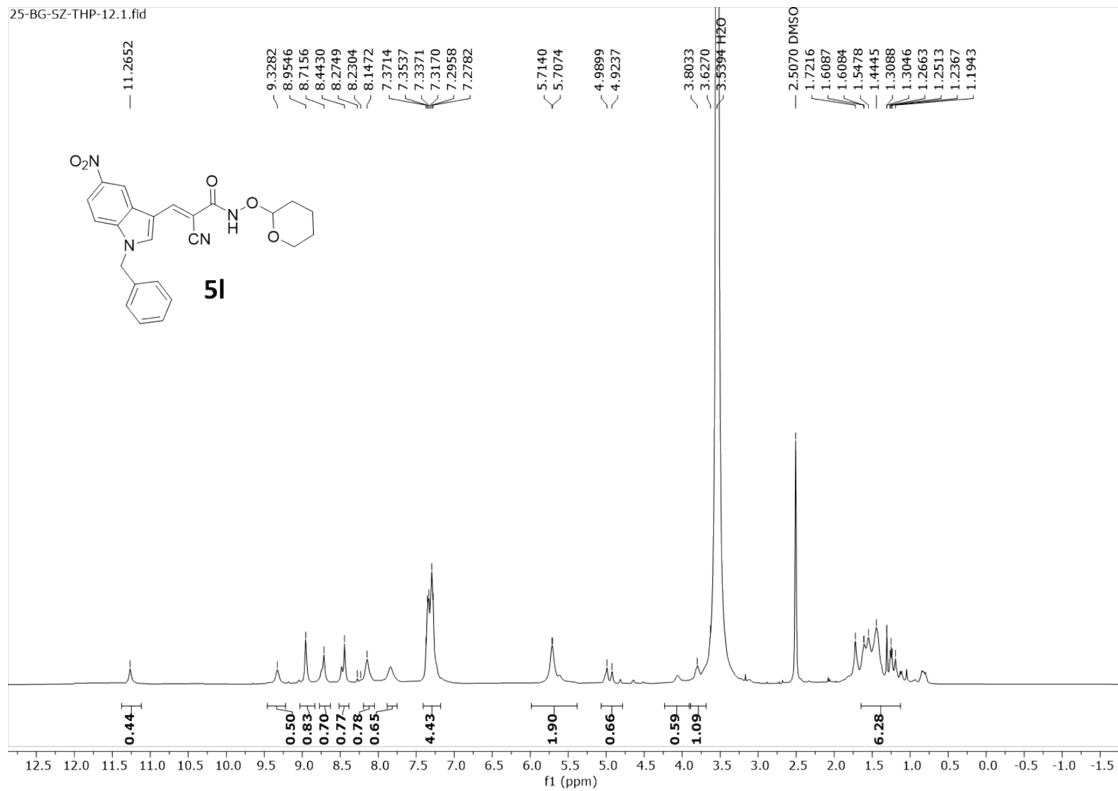Supporting Spectra S12:  $^1\text{H}$  NMR Spectra for the intermediate **5l**.

## Supporting spectra (<sup>1</sup>HNMR, <sup>13</sup>CNMR, <sup>19</sup>FNMR, HPLC, LCMS and HRMS) of final compounds (6a-6l)

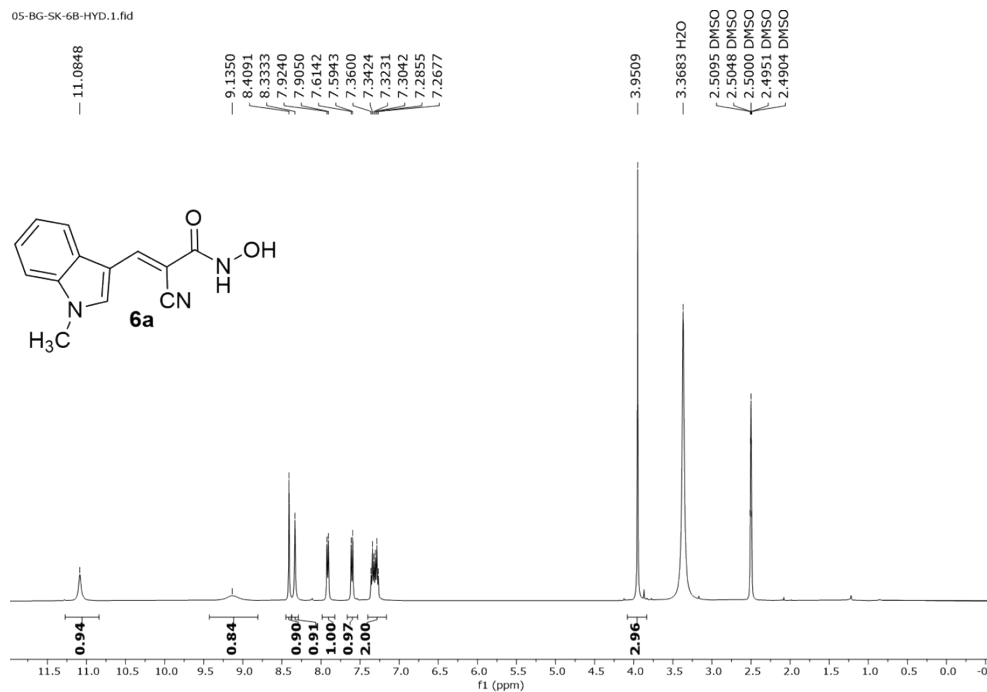

### Supporting Spectra S13: <sup>1</sup>H NMR Spectra for the compound 6a.

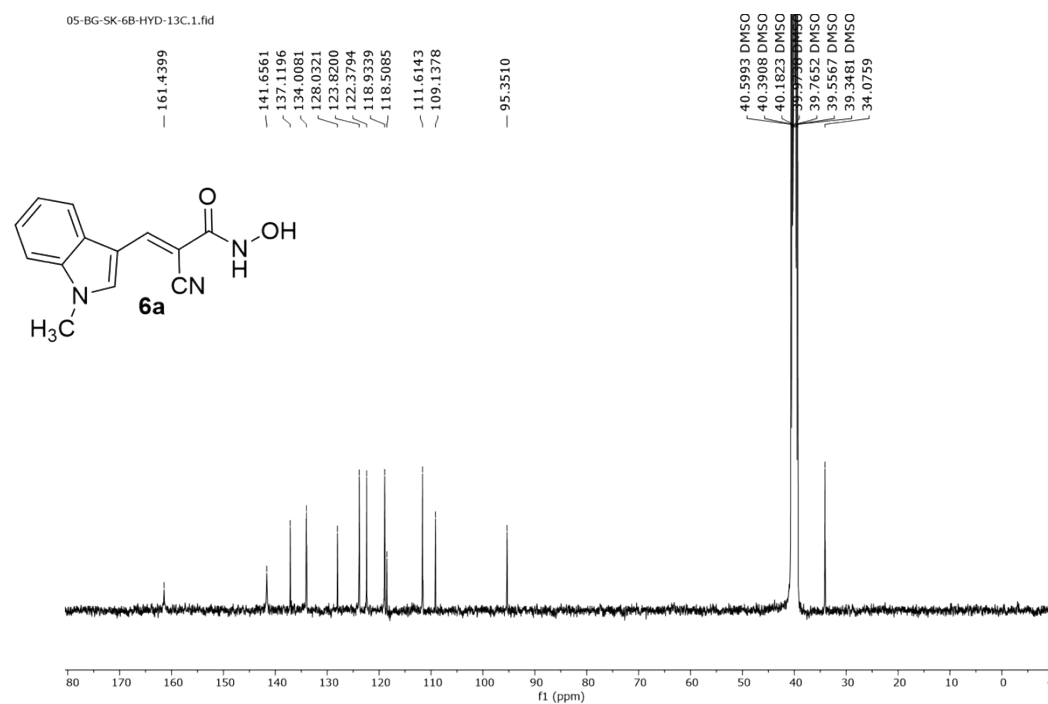

### Supporting Spectra S14: <sup>13</sup>C NMR Spectra for the compound 6a.

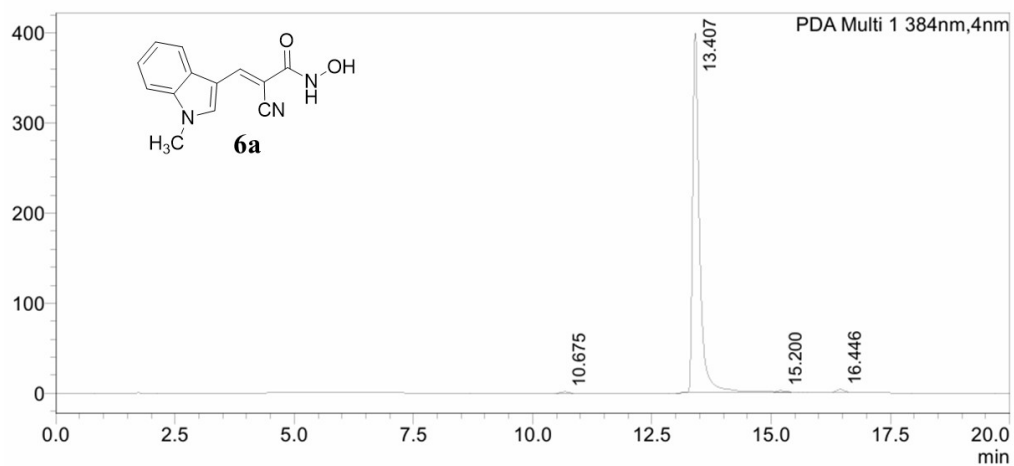

PDA Ch1 384nm

| Peak# | Ret. Time | Area    | Height | Area%   | Height% |
|-------|-----------|---------|--------|---------|---------|
| 1     | 10.675    | 14620   | 1461   | 0.356   | 0.361   |
| 2     | 13.407    | 4057867 | 398895 | 98.716  | 98.607  |
| 3     | 15.200    | 11118   | 1388   | 0.270   | 0.343   |
| 4     | 16.446    | 27035   | 2785   | 0.658   | 0.688   |
| Total |           | 4110640 | 404529 | 100.000 | 100.000 |

### Supporting Spectra S15: HPLC traces of compound 6a.

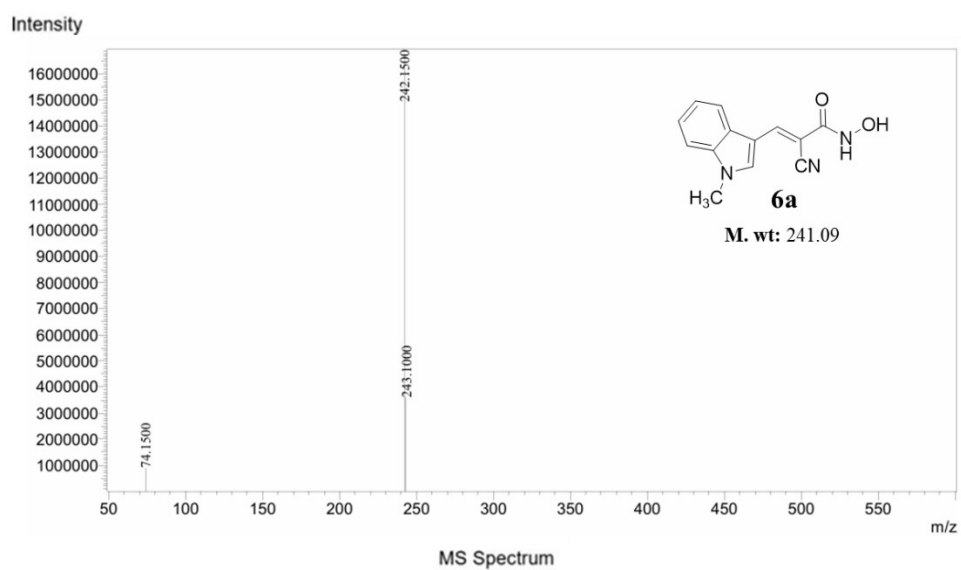

### Supporting Spectra S16: LC-MS Spectra for the compound 6a.

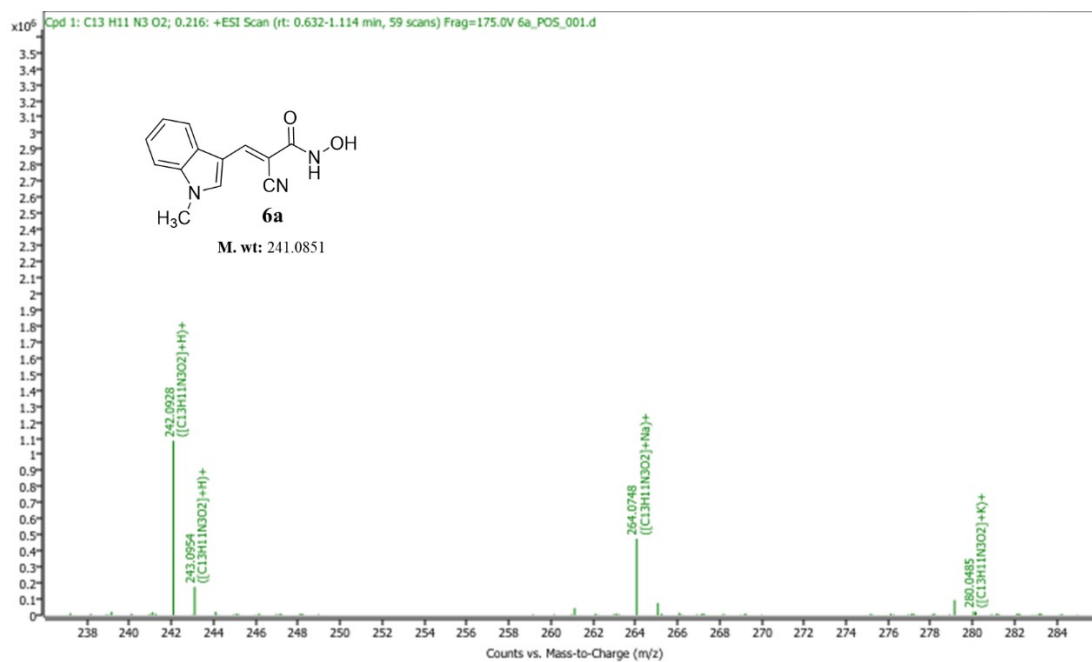

**Supporting Spectra S17: HRMS Spectra for the compound 6a.**

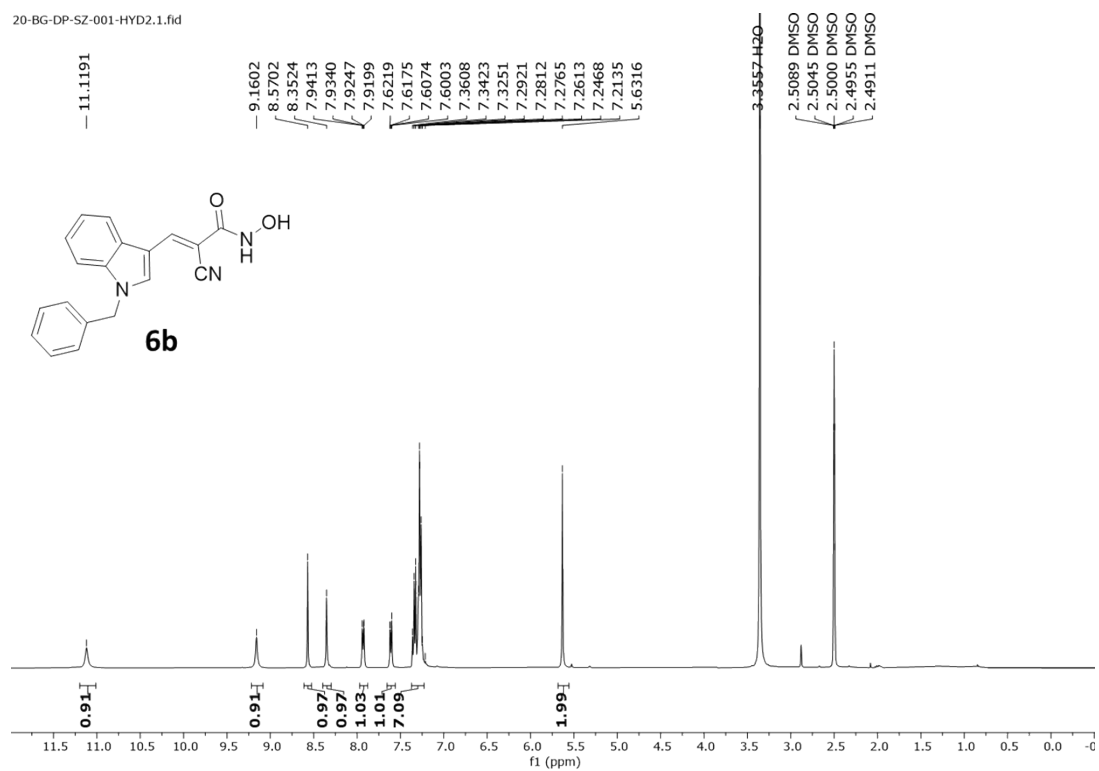

**Supporting Spectra S18: <sup>1</sup>H NMR Spectra for the compound 6b.**

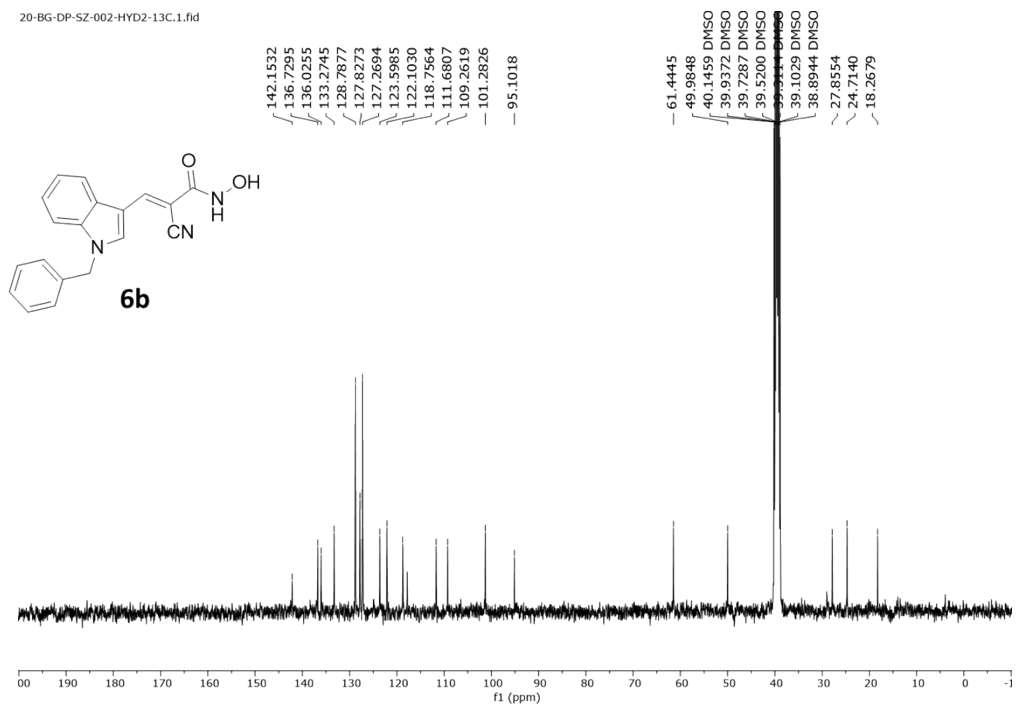

Supporting Spectra S19:  $^{13}\text{C}$  NMR Spectra for the compound **6b**.

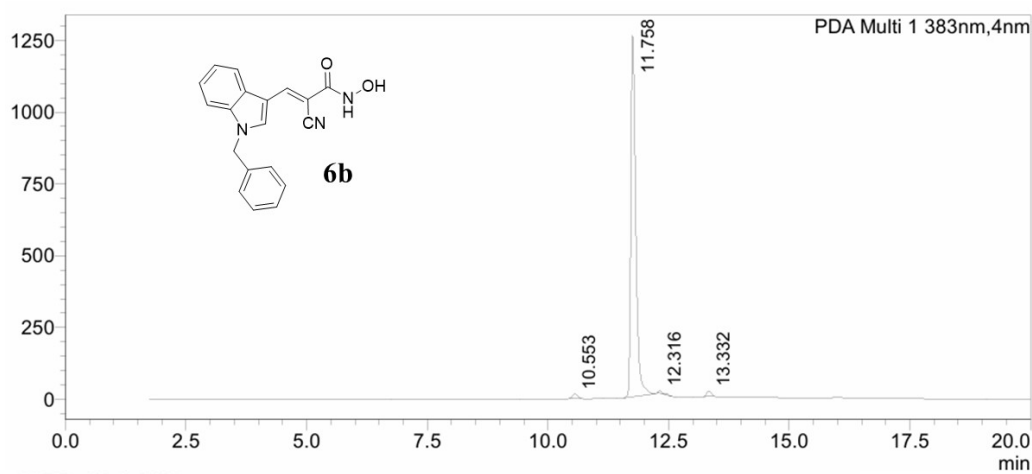

PDA Ch1 383nm

| Peak# | Ret. Time | Area    | Height  | Area%   | Height% |
|-------|-----------|---------|---------|---------|---------|
| 1     | 10.553    | 105869  | 14867   | 1.151   | 1.143   |
| 2     | 11.758    | 8919644 | 1259947 | 97.012  | 96.874  |
| 3     | 12.316    | 53485   | 7746    | 0.582   | 0.596   |
| 4     | 13.332    | 115357  | 18039   | 1.255   | 1.387   |
| Total |           | 9194354 | 1300599 | 100.000 | 100.000 |

Supporting Spectra S20: HPLC traces of compound **6b**.

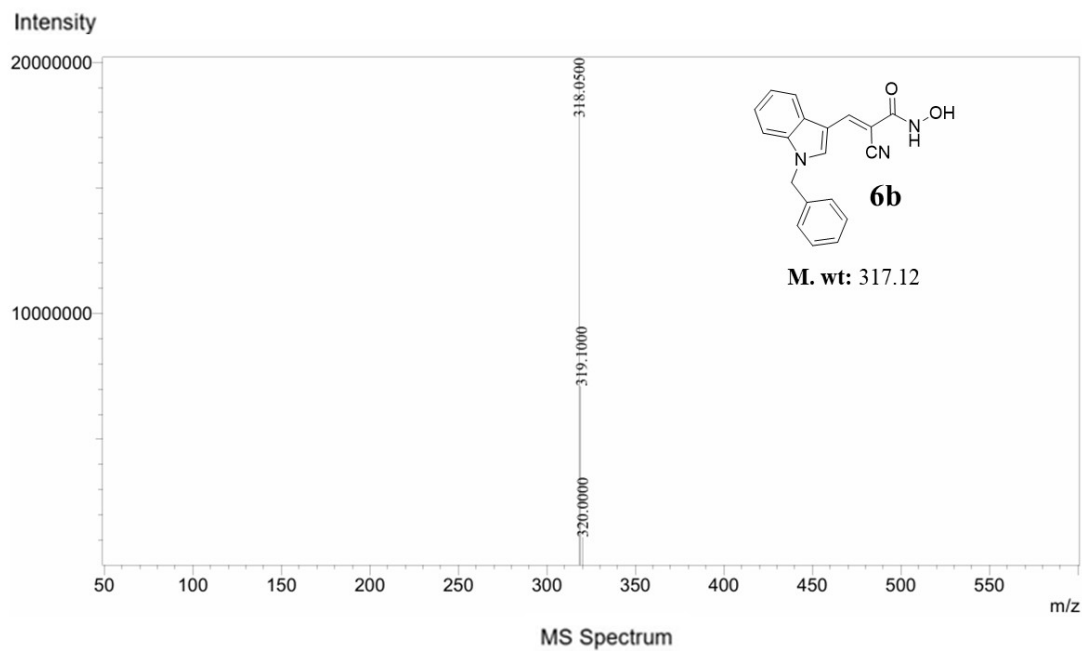

Supporting Spectra S21: LC-MS Spectra for the compound 6b.

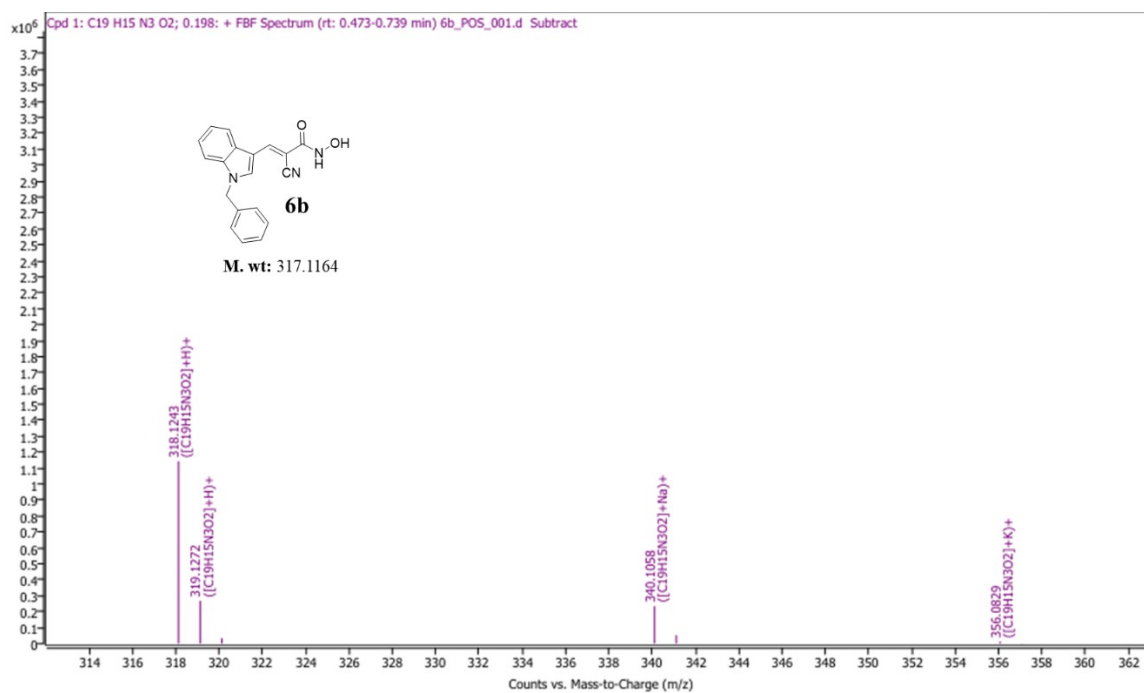

Supporting Spectra S22: HRMS Spectra for the compound 6b.

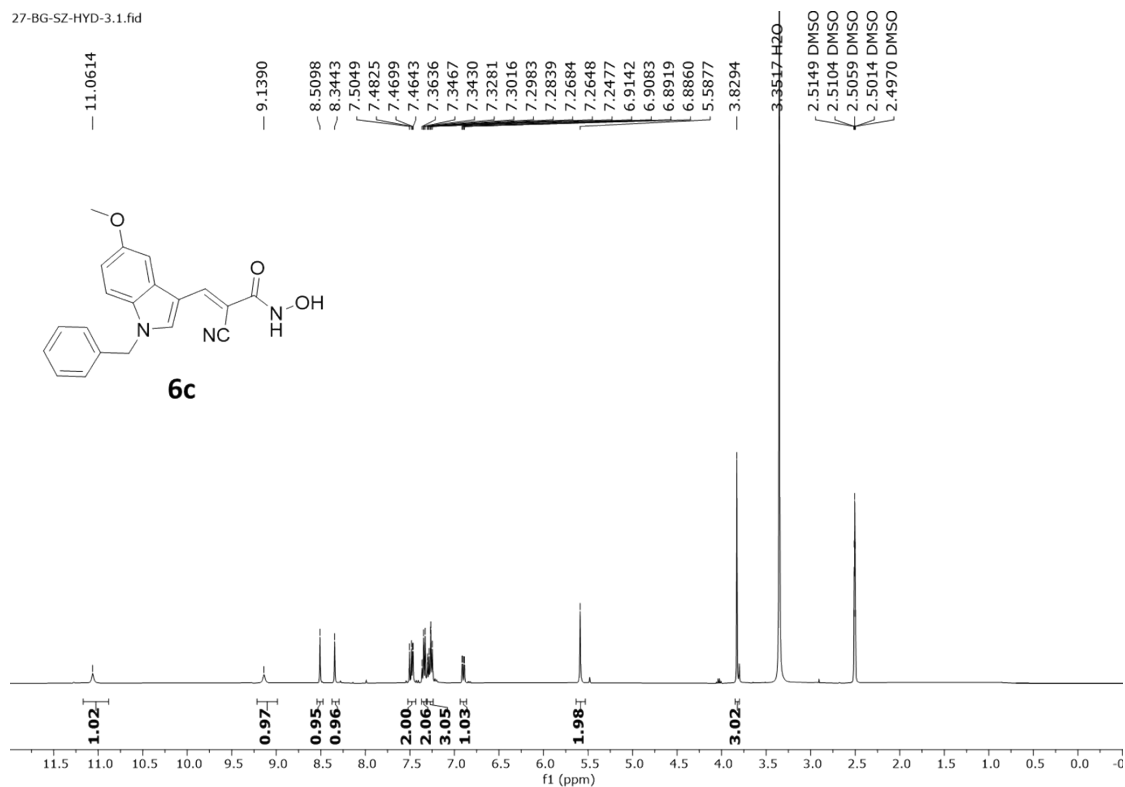

**Supporting Spectra S23: <sup>1</sup>H NMR Spectra for the compound 6c.**

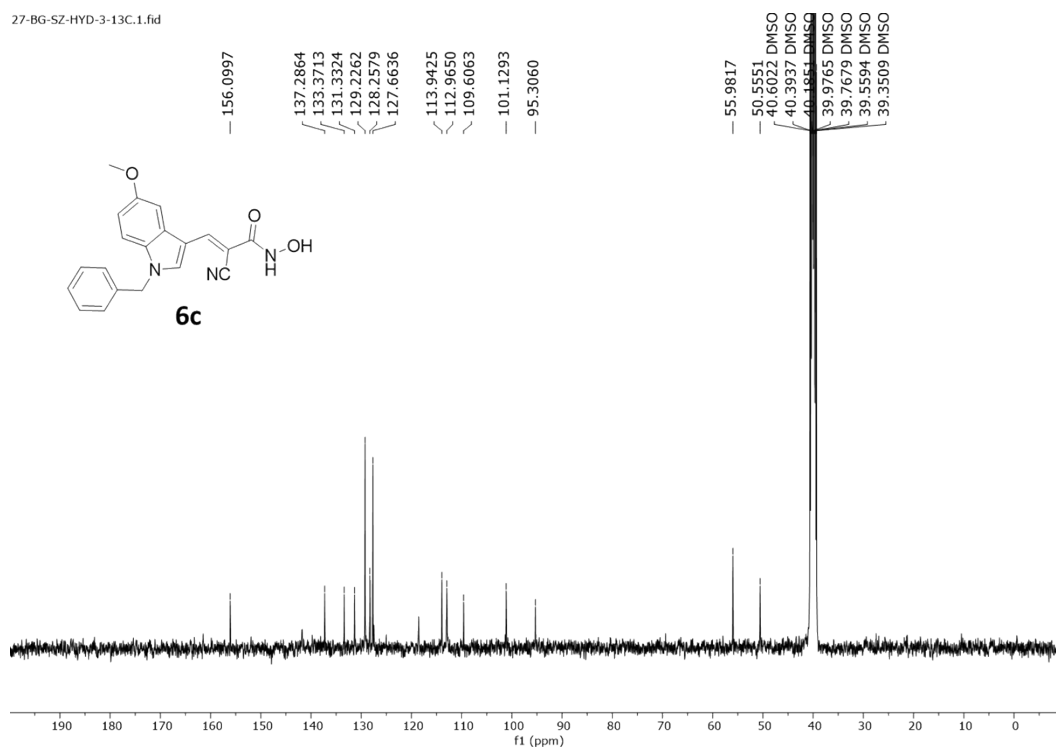

**Supporting Spectra S24: <sup>13</sup>C NMR Spectra for the compound 6c.**

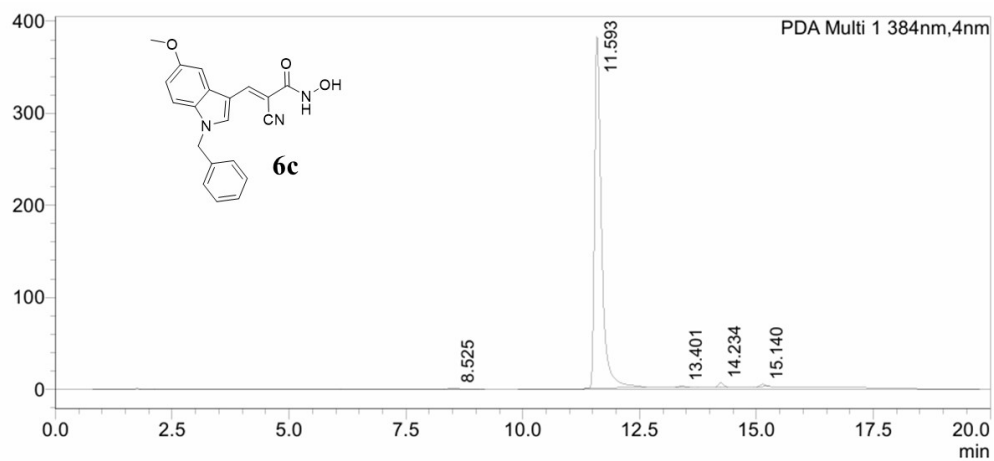

PDA Ch1 384nm

| Peak# | Ret. Time | Area    | Height | Area%   | Height% |
|-------|-----------|---------|--------|---------|---------|
| 1     | 8.525     | 8820    | 1024   | 0.219   | 0.261   |
| 2     | 11.593    | 3957279 | 382542 | 98.250  | 97.578  |
| 3     | 13.401    | 11483   | 1553   | 0.285   | 0.396   |
| 4     | 14.234    | 30731   | 4428   | 0.763   | 1.129   |
| 5     | 15.140    | 19439   | 2491   | 0.483   | 0.635   |
| Total |           | 4027752 | 392038 | 100.000 | 100.000 |

### Supporting Spectra S25: HPLC traces of compound 6c.

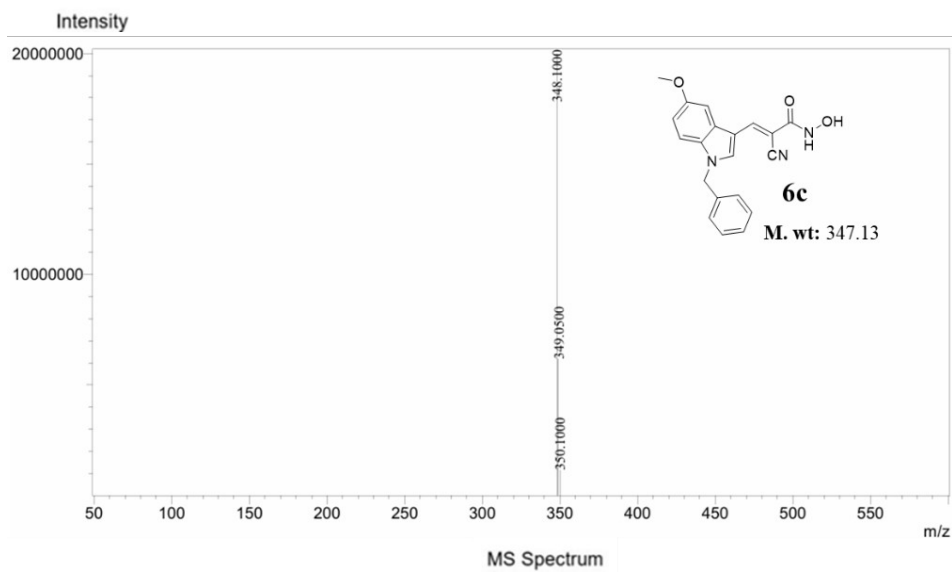

### Supporting Spectra S26: LC-MS Spectra for the compound 6c.

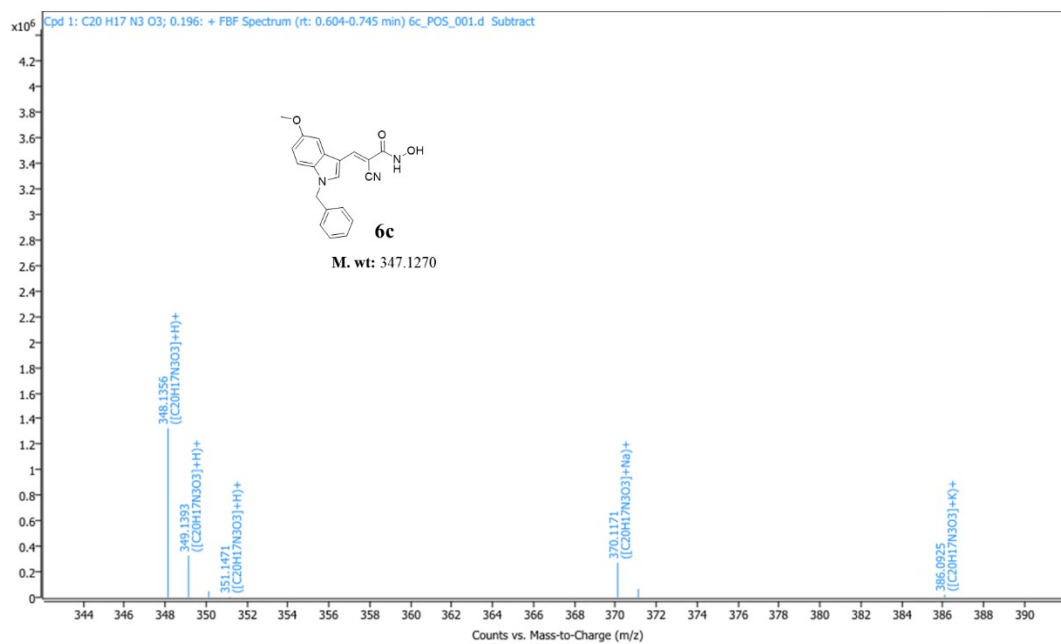

**Supporting Spectra S27: HRMS Spectra for the compound 6c.**

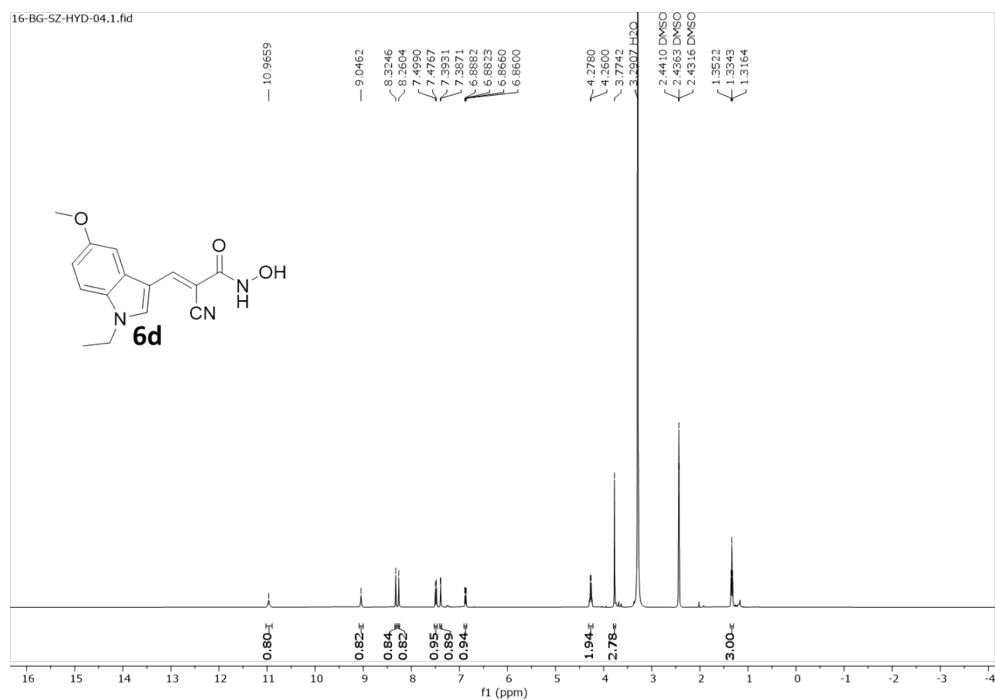

**Supporting Spectra S28: <sup>1</sup>H NMR Spectra for the compound 6d.**

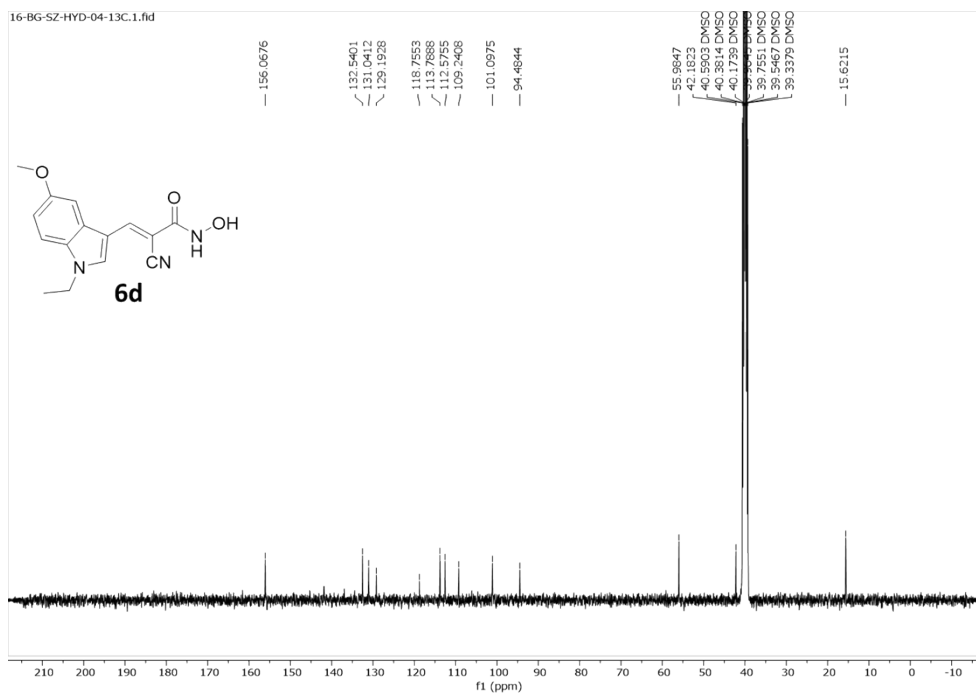

Supporting Spectra S29:  $^{13}\text{C}$  NMR Spectra for the compound **6d**.

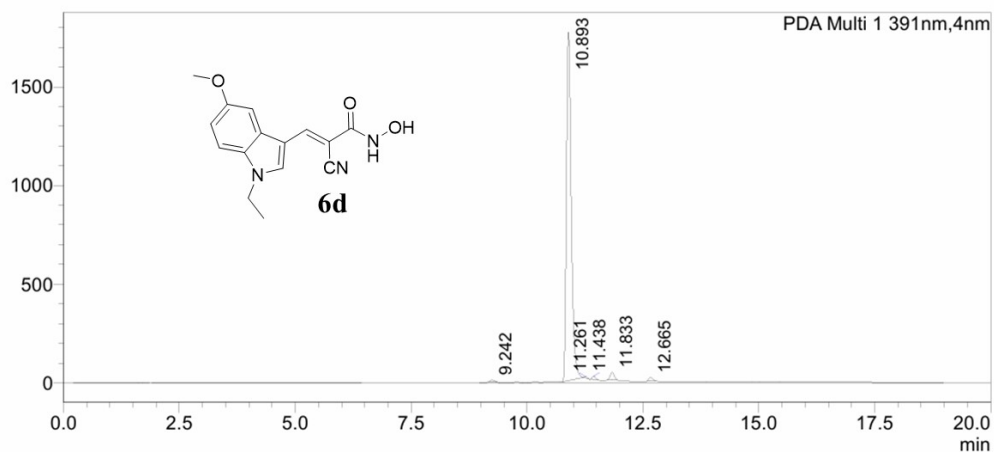

PDA Ch1 391nm

| Peak# | Ret. Time | Area     | Height  | Area%   | Height% |
|-------|-----------|----------|---------|---------|---------|
| 1     | 9.242     | 55968    | 8949    | 0.425   | 0.483   |
| 2     | 10.893    | 12681531 | 1766003 | 96.385  | 95.372  |
| 3     | 11.261    | 29746    | 7418    | 0.226   | 0.401   |
| 4     | 11.438    | 74014    | 15434   | 0.563   | 0.833   |
| 5     | 11.833    | 217936   | 36833   | 1.656   | 1.989   |
| 6     | 12.665    | 97902    | 17062   | 0.744   | 0.921   |
| Total |           | 13157096 | 1851699 | 100.000 | 100.000 |

Supporting Spectra S30: HPLC traces of compound **6d**.

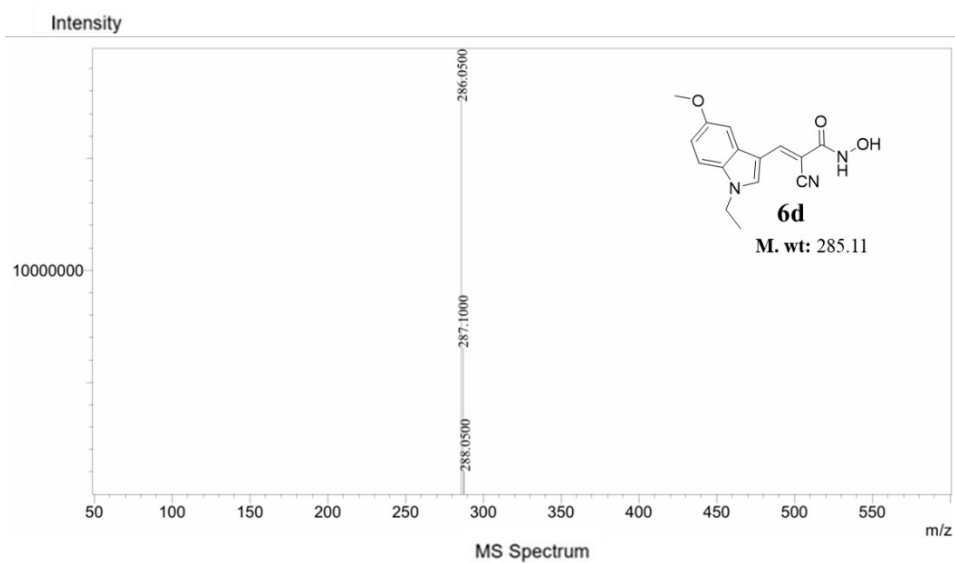

Supporting Spectra S31: LC-MS Spectra for the compound 6d.

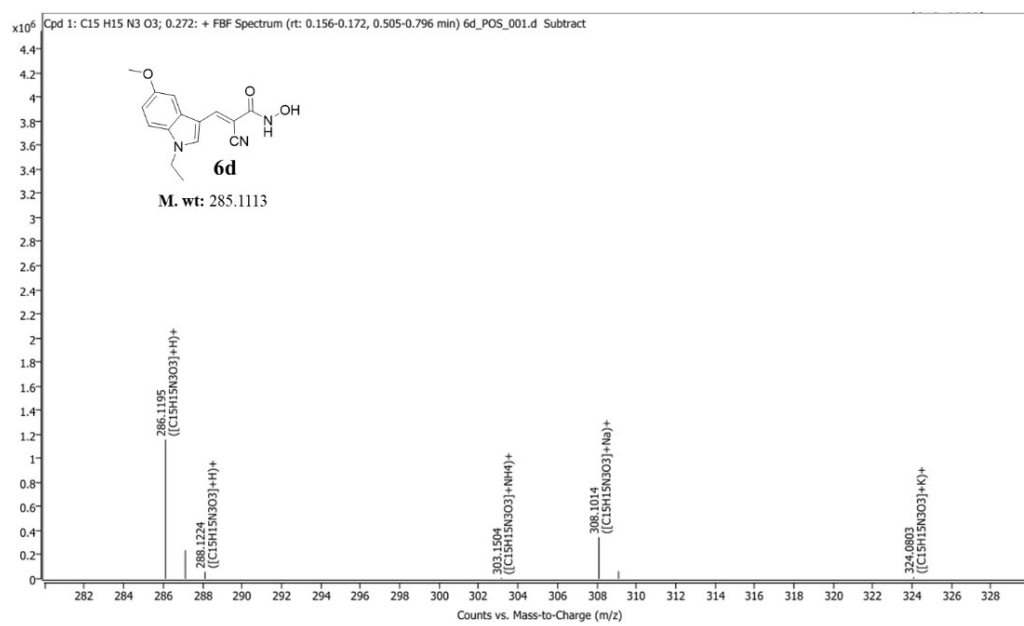

Supporting Spectra S32: HRMS Spectra for the compound 6d.

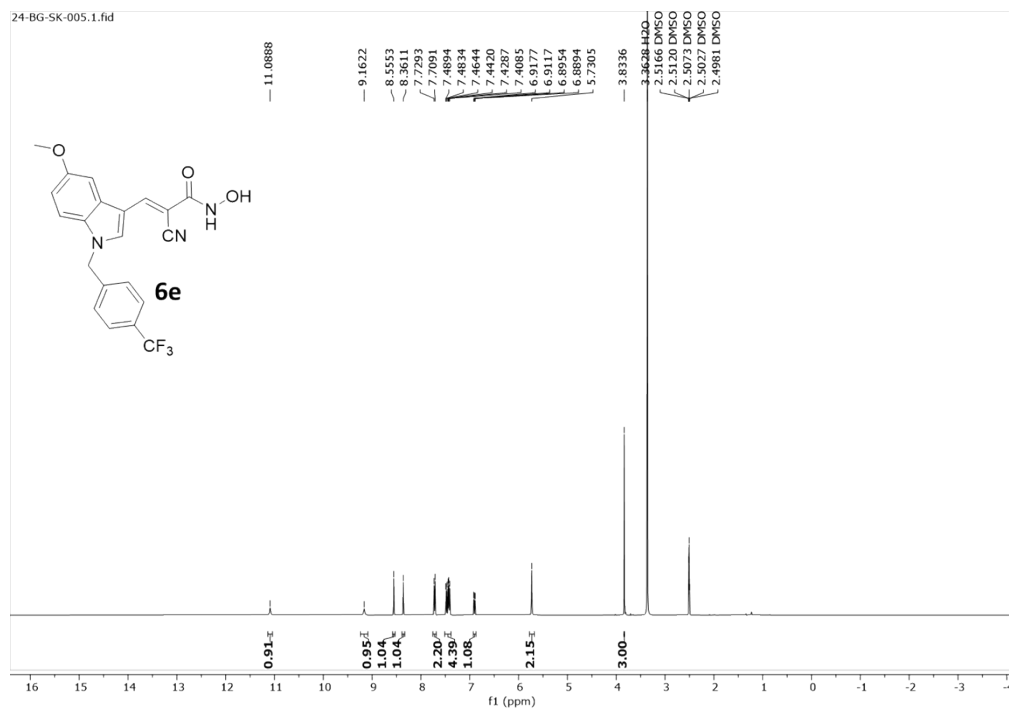

Supporting Spectra S33: <sup>1</sup>H NMR Spectra for the compound **6e**.

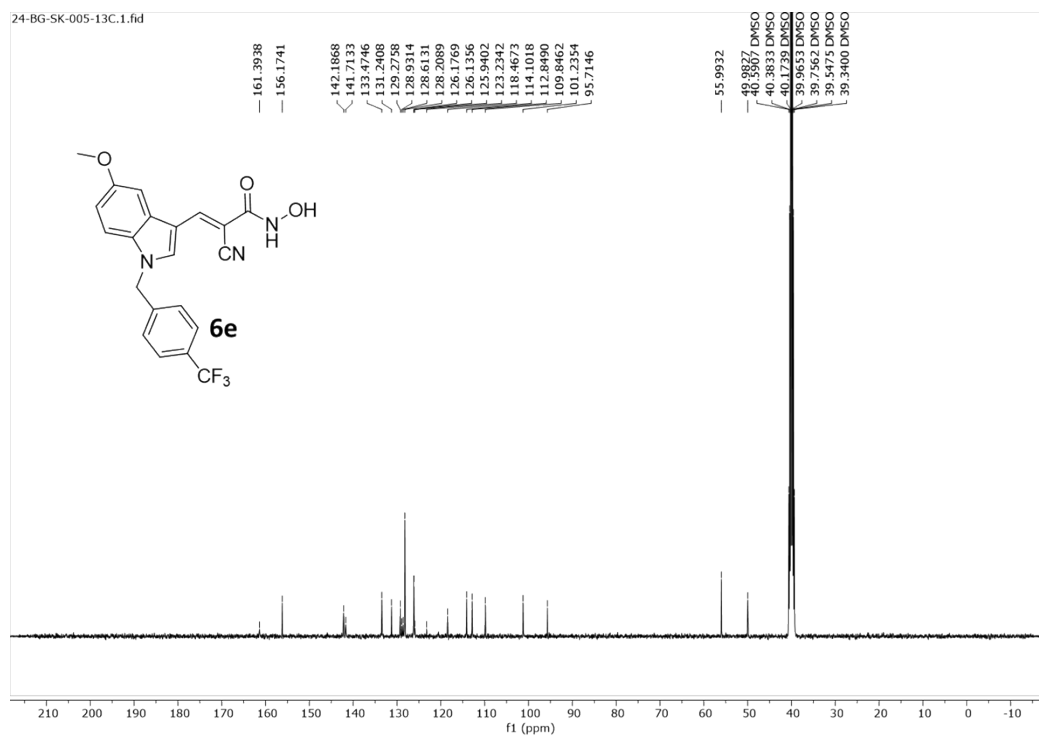

Supporting Spectra S34: <sup>13</sup>C NMR Spectra for the compound **6e**.

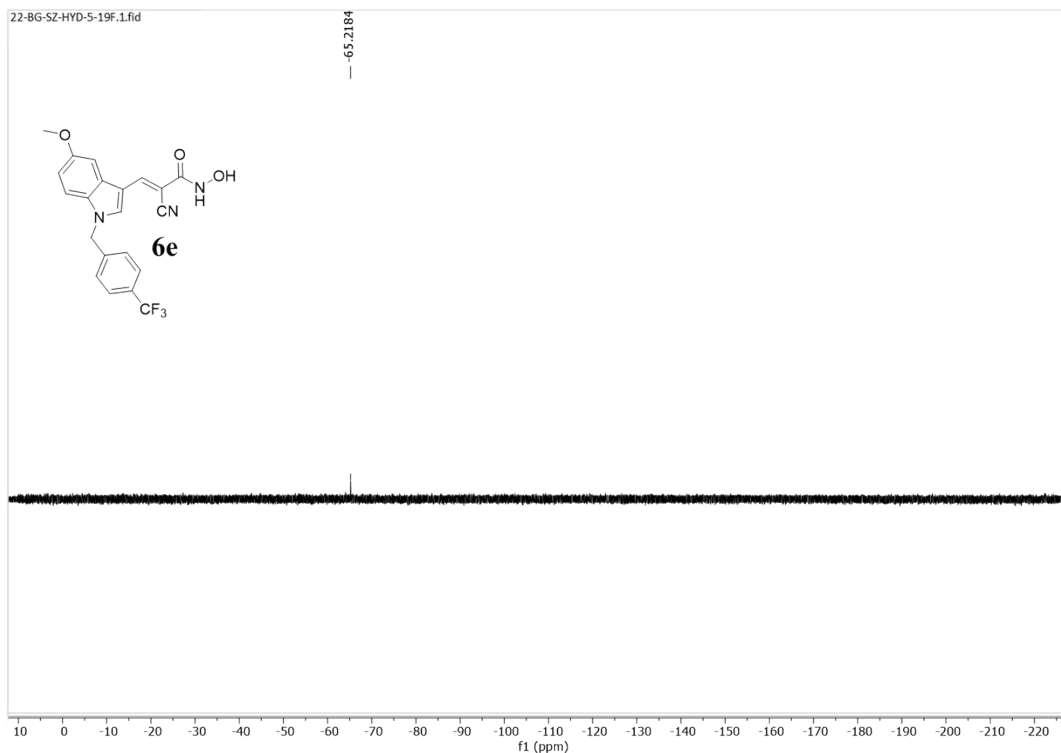

**Supporting Spectra S35:  $^{19}\text{F}$  NMR Spectra for the compound 6e.**

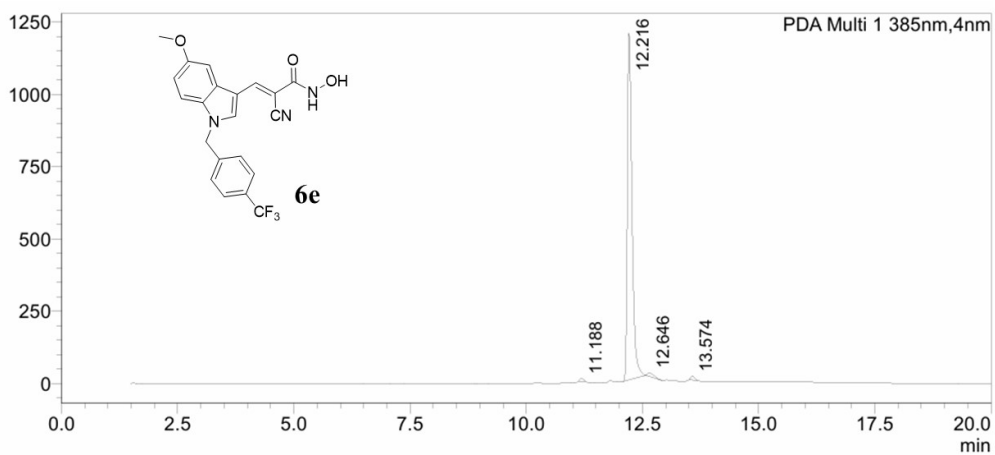

PDA Ch1 385nm

| Peak# | Ret. Time | Area    | Height  | Area%   | Height% |
|-------|-----------|---------|---------|---------|---------|
| 1     | 11.188    | 51279   | 9668    | 0.597   | 0.784   |
| 2     | 12.216    | 8354929 | 1198634 | 97.270  | 97.187  |
| 3     | 12.646    | 105064  | 11798   | 1.223   | 0.957   |
| 4     | 13.574    | 78140   | 13232   | 0.910   | 1.073   |
| Total |           | 8589412 | 1233332 | 100.000 | 100.000 |

**Supporting Spectra S36: HPLC traces of compound 6e.**

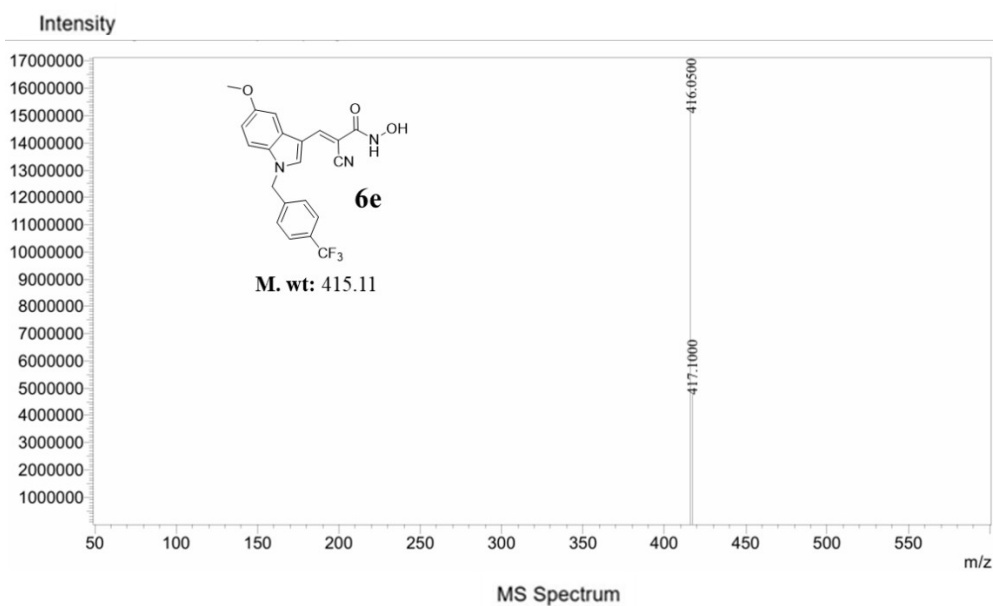

Supporting Spectra S37: LC-MS Spectra for the compound 6e.

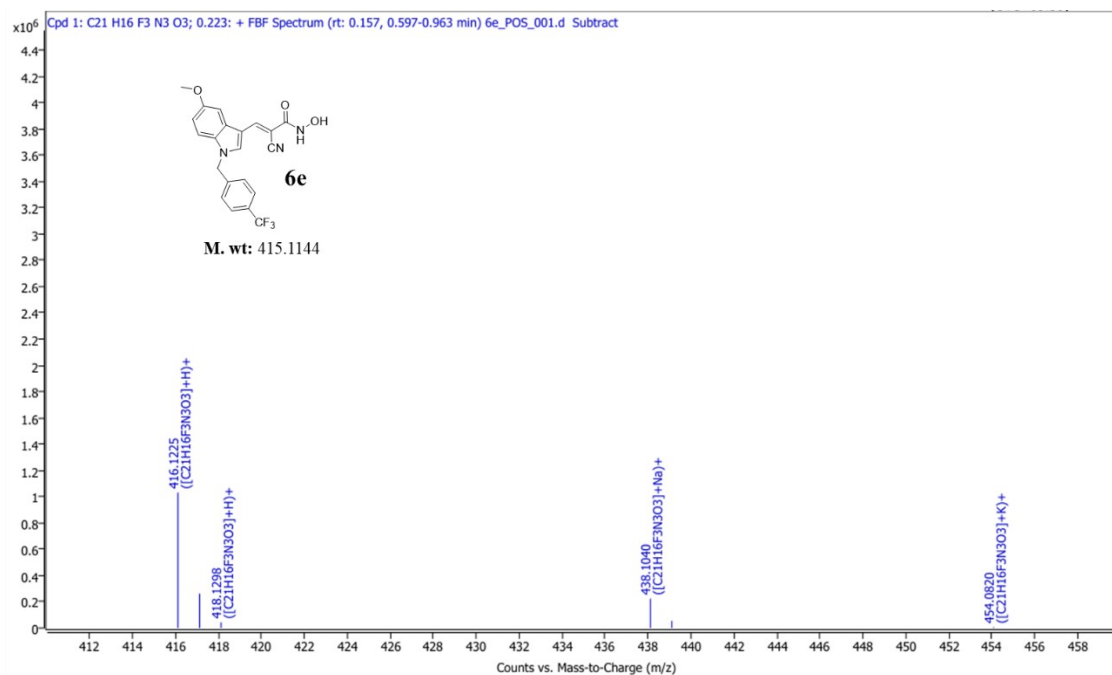

Supporting Spectra S38: HRMS Spectra for the compound 6e.

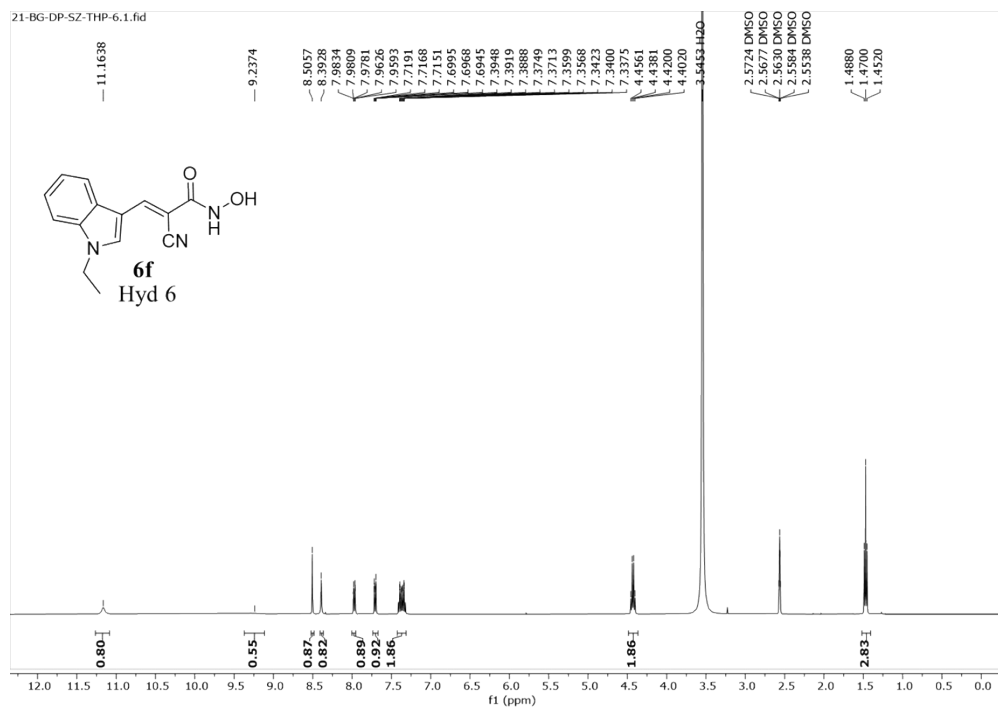

Supporting Spectra S39: <sup>1</sup>H NMR Spectra for the compound **6f**.

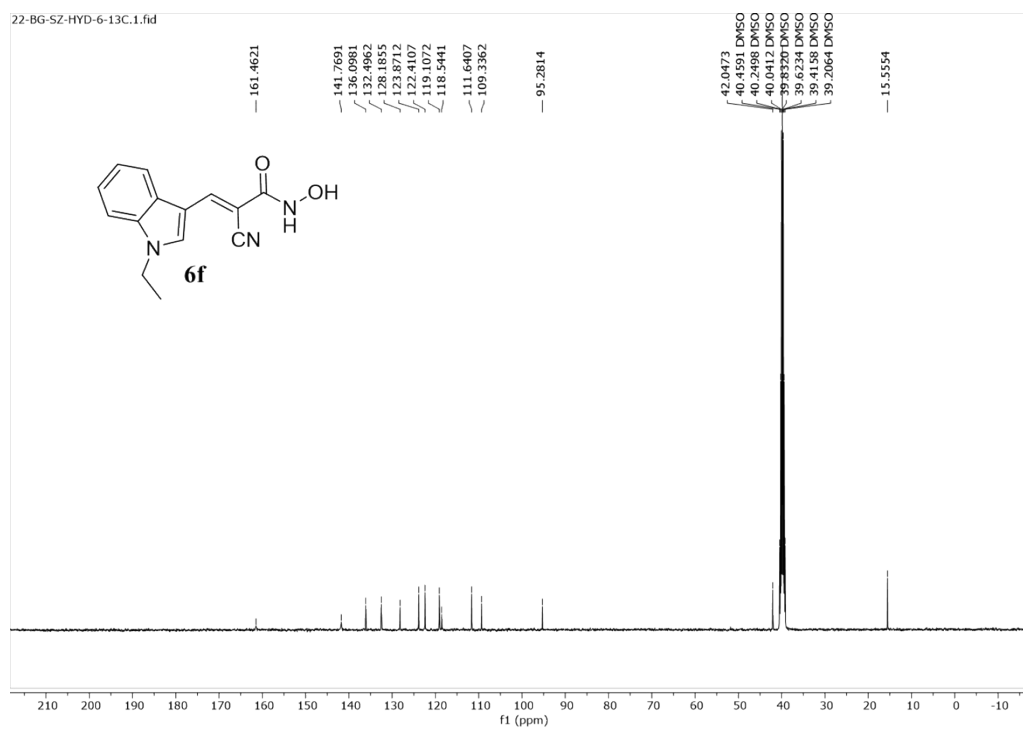

Supporting Spectra S40: <sup>13</sup>C NMR Spectra for the compound **6f**.

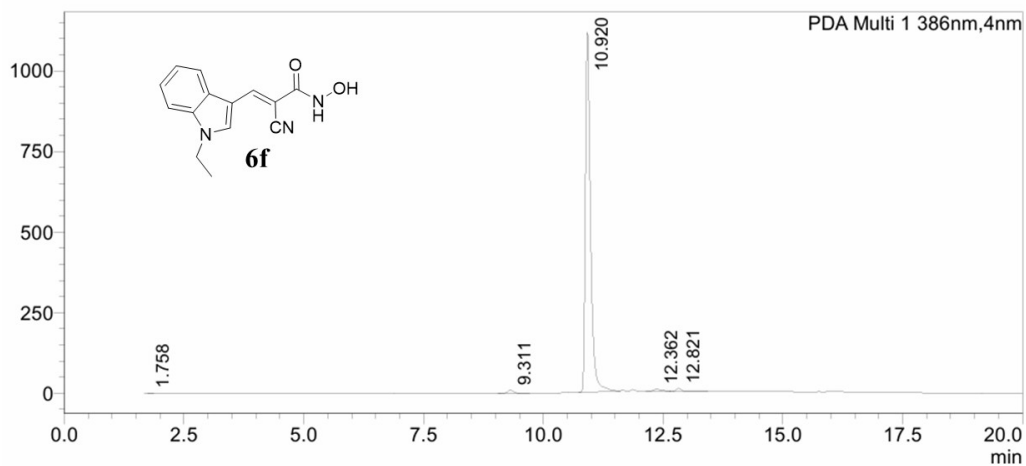

PDA Ch1 386nm

| Peak# | Ret. Time | Area    | Height  | Area%   | Height% |
|-------|-----------|---------|---------|---------|---------|
| 1     | 1.758     | 2996    | 820     | 0.035   | 0.072   |
| 2     | 9.311     | 84436   | 9655    | 0.974   | 0.844   |
| 3     | 10.920    | 8400757 | 1116924 | 96.920  | 97.593  |
| 4     | 12.362    | 93439   | 7016    | 1.078   | 0.613   |
| 5     | 12.821    | 86091   | 10050   | 0.993   | 0.878   |
| Total |           | 8667719 | 1144466 | 100.000 | 100.000 |

Supporting Spectra S41: HPLC traces of compound 6f.

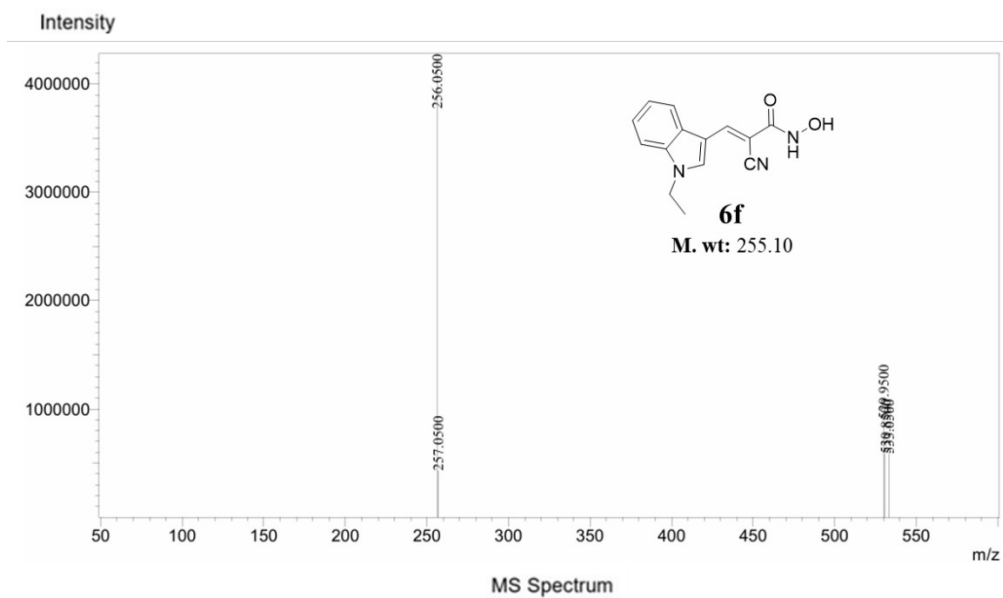

Supporting Spectra S42: LC-MS Spectra for the compound 6f.

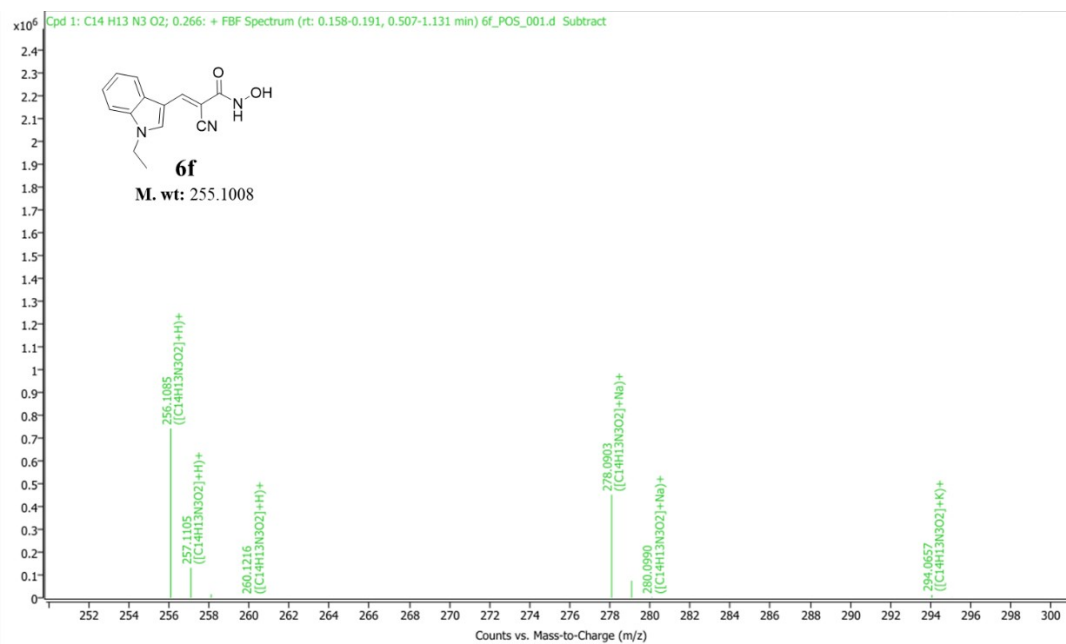

Supporting Spectra S43: HRMS Spectra for the compound 6f.

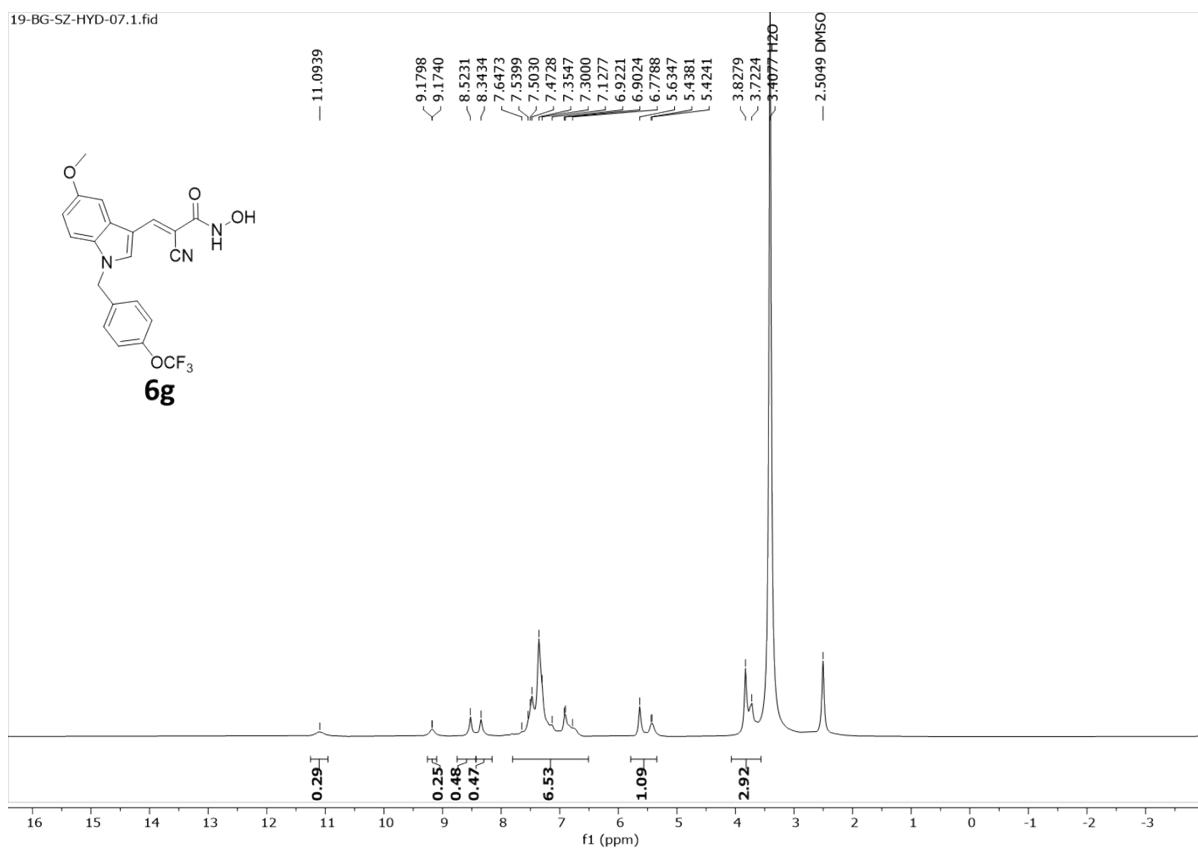

Supporting Spectra S44: <sup>1</sup>H NMR Spectra for the compound 6g.

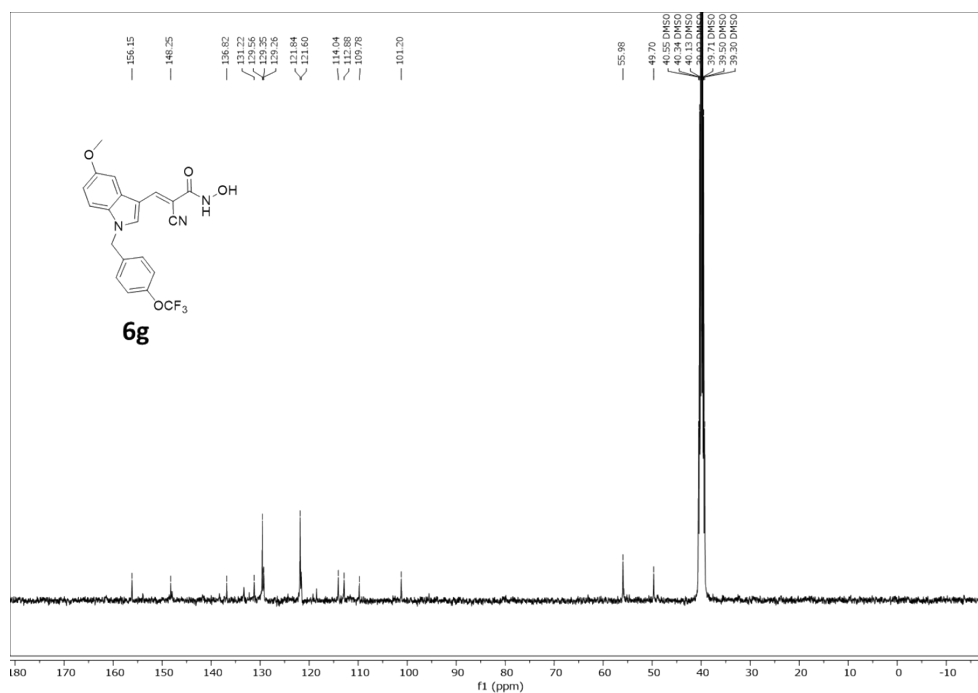

**Supporting Spectra S45:  $^{13}\text{C}$  NMR Spectra for the compound **6g**.**

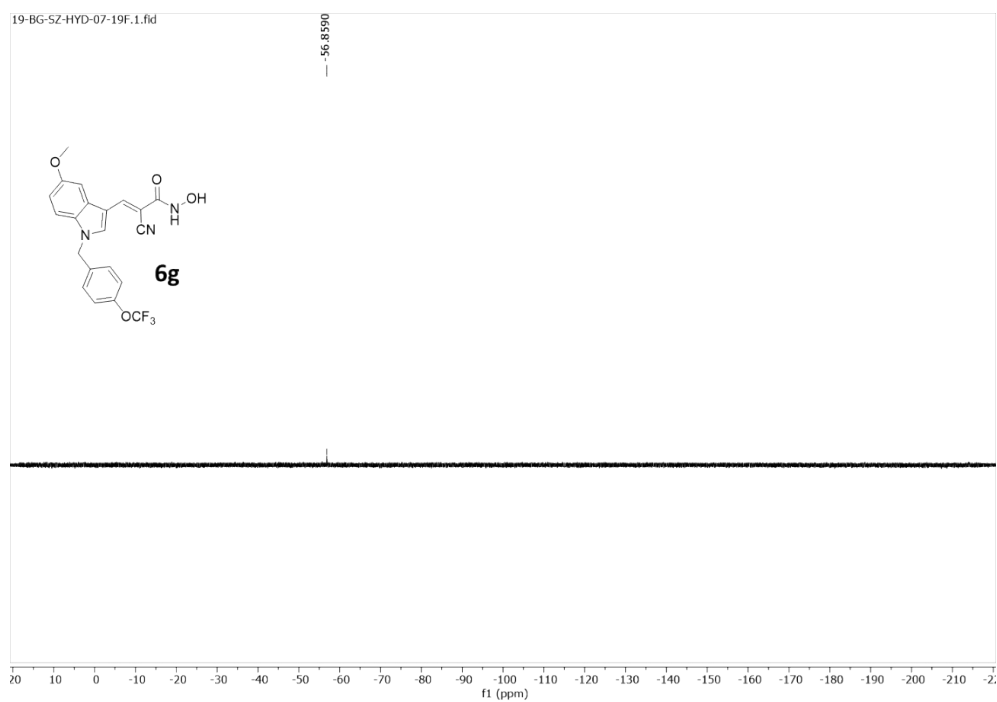

**Supporting Spectra S46:  $^{19}\text{F}$  NMR Spectra for the compound **6g**.**

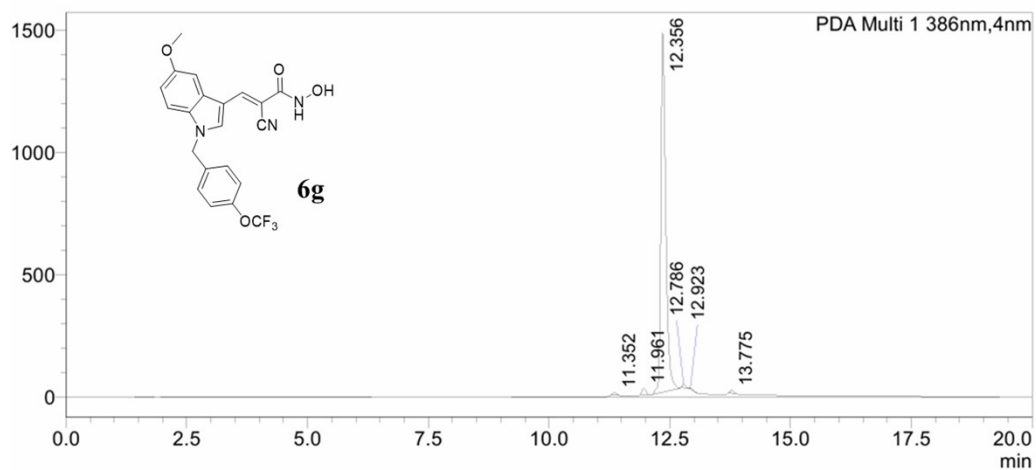

PDA Ch1 386nm

| Peak# | Ret. Time | Area     | Height  | Area%   | Height% |
|-------|-----------|----------|---------|---------|---------|
| 1     | 11.352    | 55378    | 9887    | 0.515   | 0.647   |
| 2     | 11.961    | 126335   | 24410   | 1.175   | 1.596   |
| 3     | 12.356    | 10442125 | 1469240 | 97.119  | 96.083  |
| 4     | 12.786    | 61499    | 13318   | 0.572   | 0.871   |
| 5     | 12.923    | 12457    | 1836    | 0.116   | 0.120   |
| 6     | 13.775    | 54106    | 10440   | 0.503   | 0.683   |
| Total |           | 10751901 | 1529132 | 100.000 | 100.000 |

Supporting Spectra S47: HPLC traces of compound 6g.

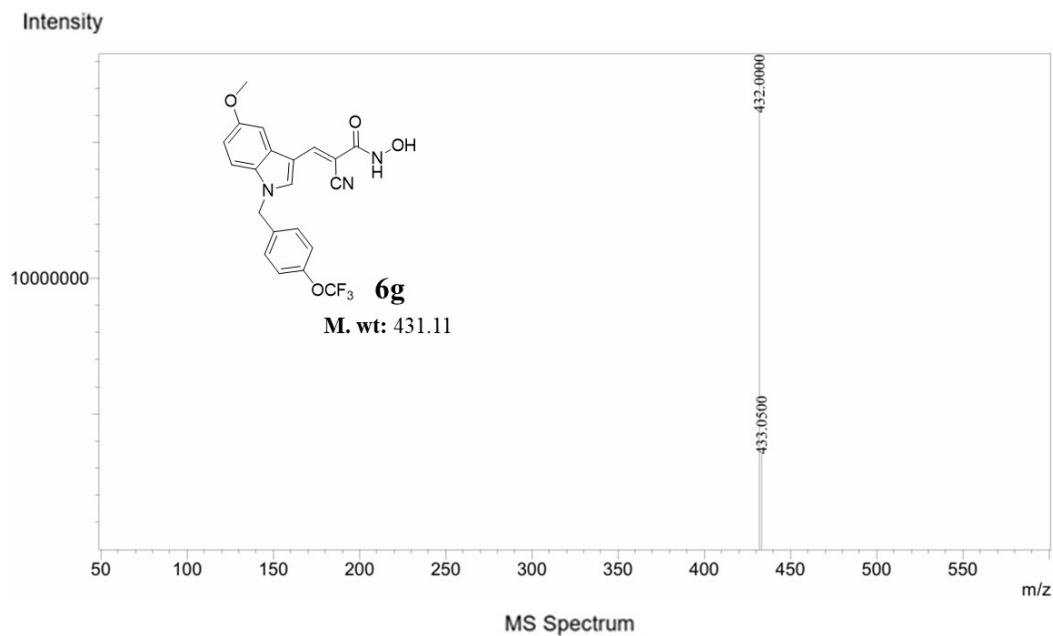

Supporting Spectra S48: LC-MS Spectra for the compound 6g.

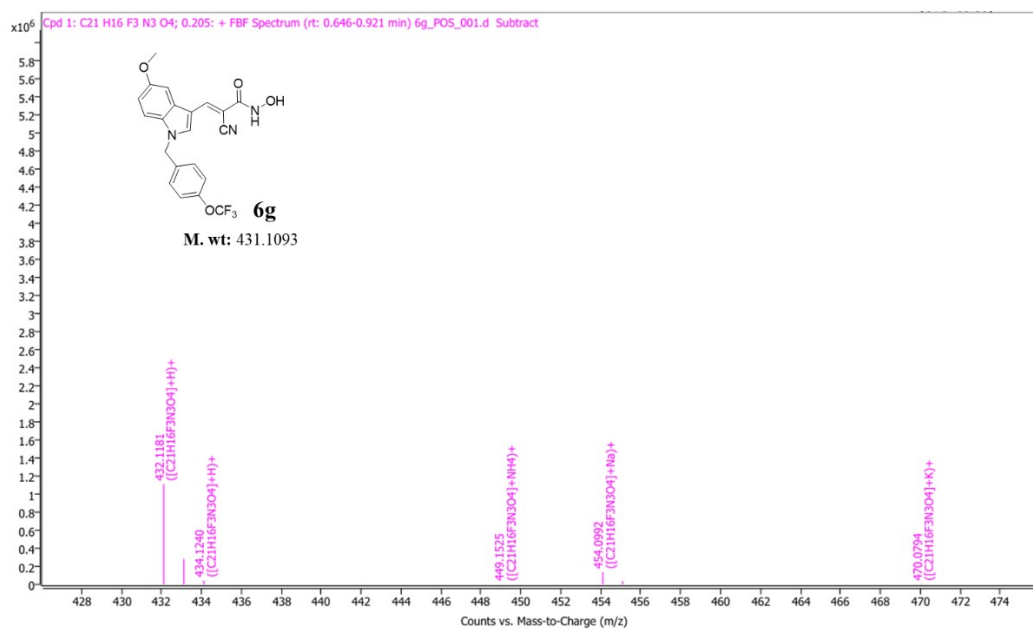

**Supporting Spectra S49: HRMS Spectra for the compound 6g.**

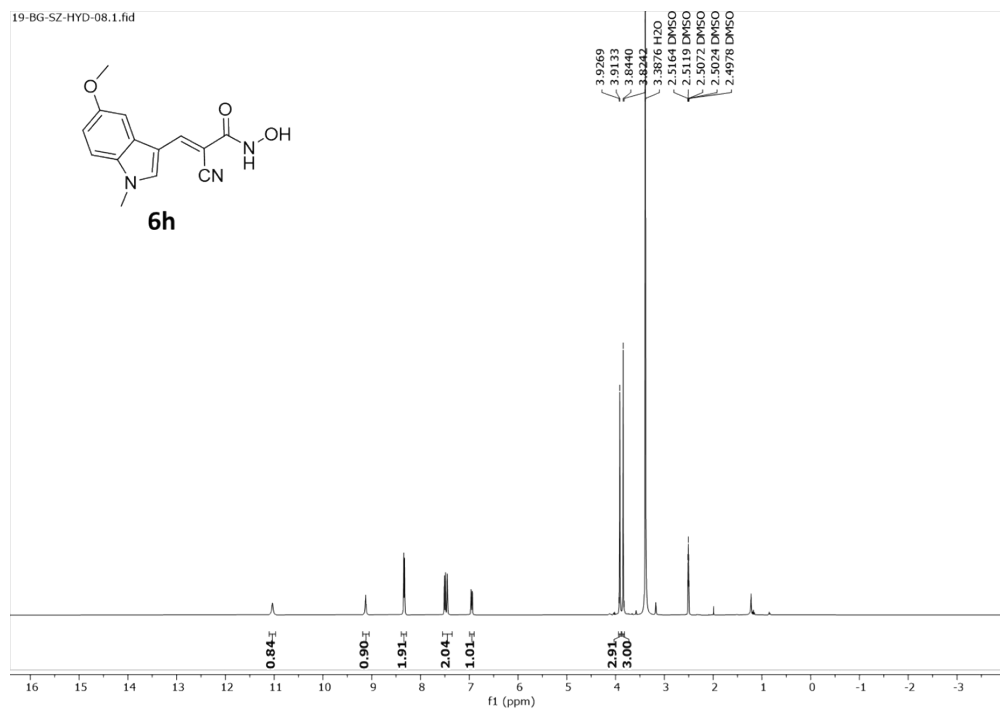

**Supporting Spectra S50: <sup>1</sup>H NMR Spectra for the compound 6h.**

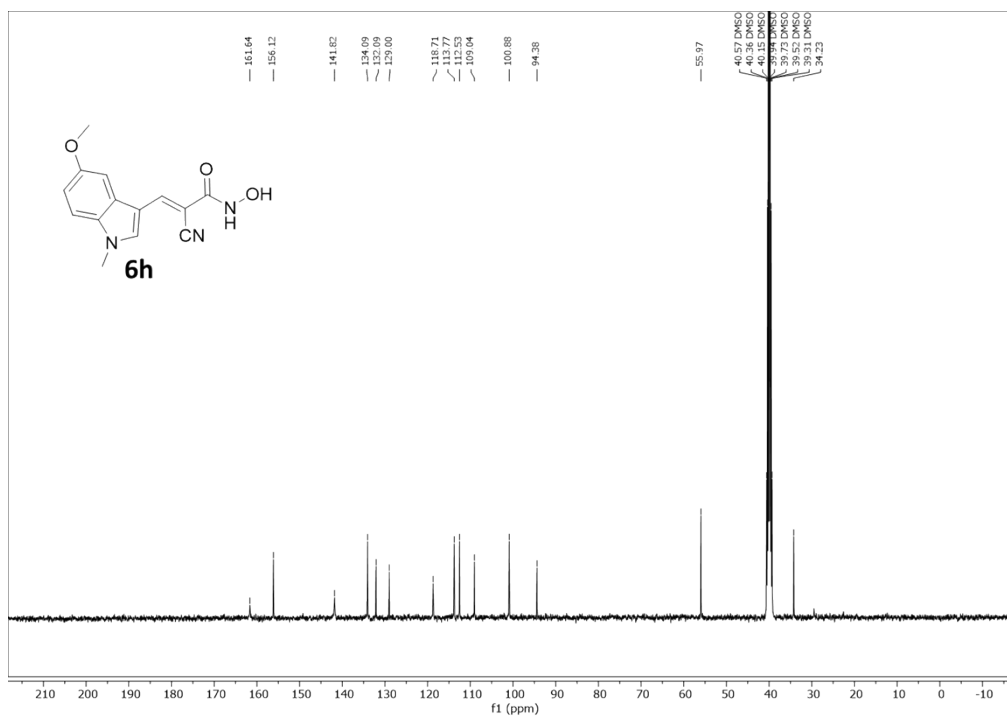

Supporting Spectra S51:  $^{13}\text{C}$  NMR Spectra for compound 6h.

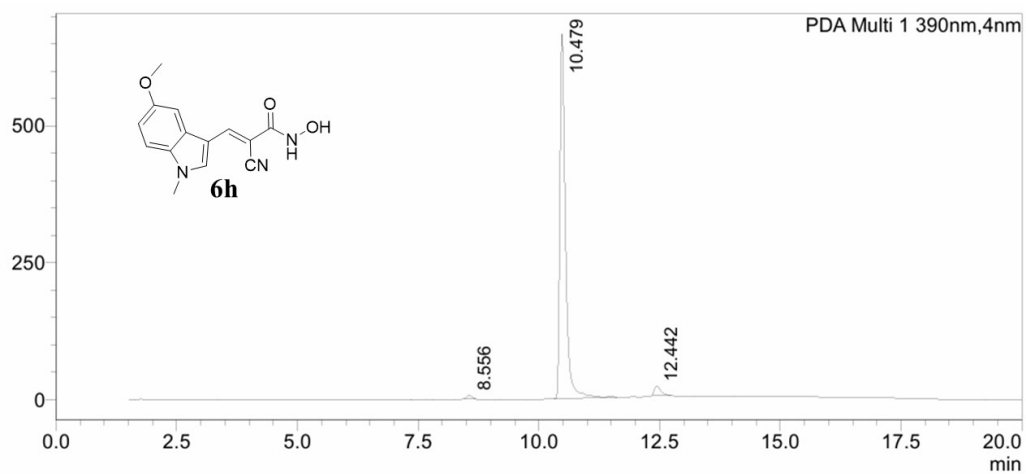

PDA Ch1 390nm

| Peak# | Ret. Time | Area    | Height | Area%   | Height% |
|-------|-----------|---------|--------|---------|---------|
| 1     | 8.556     | 43165   | 5986   | 0.768   | 0.869   |
| 2     | 10.479    | 5419274 | 665982 | 96.420  | 96.683  |
| 3     | 12.442    | 158052  | 16863  | 2.812   | 2.448   |
| Total |           | 5620491 | 688832 | 100.000 | 100.000 |

Supporting Spectra S52: HPLC traces of compound 6h.

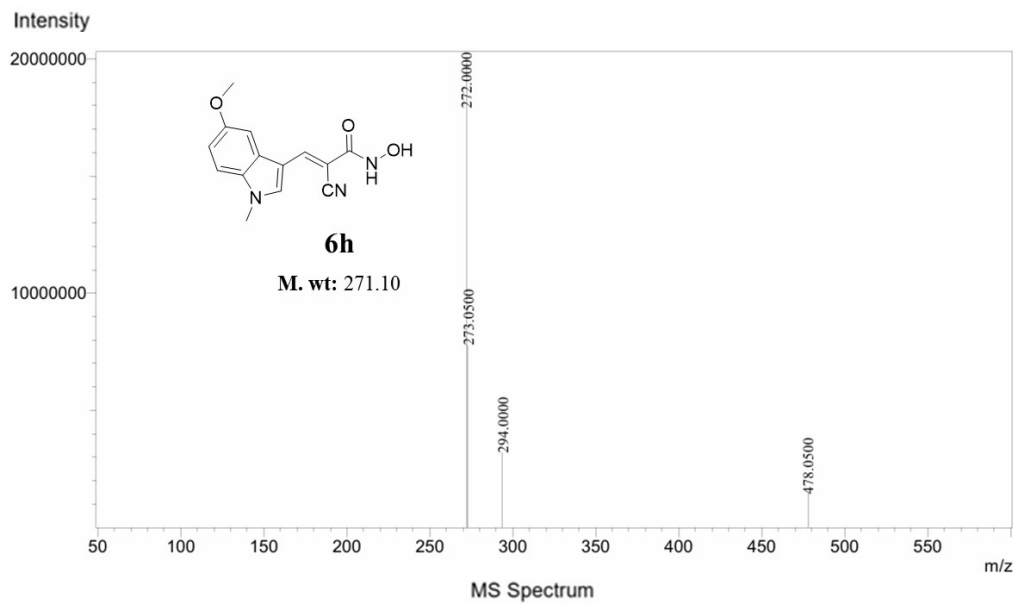

Supporting Spectra S53: LC-MS Spectra for the compound 6h.

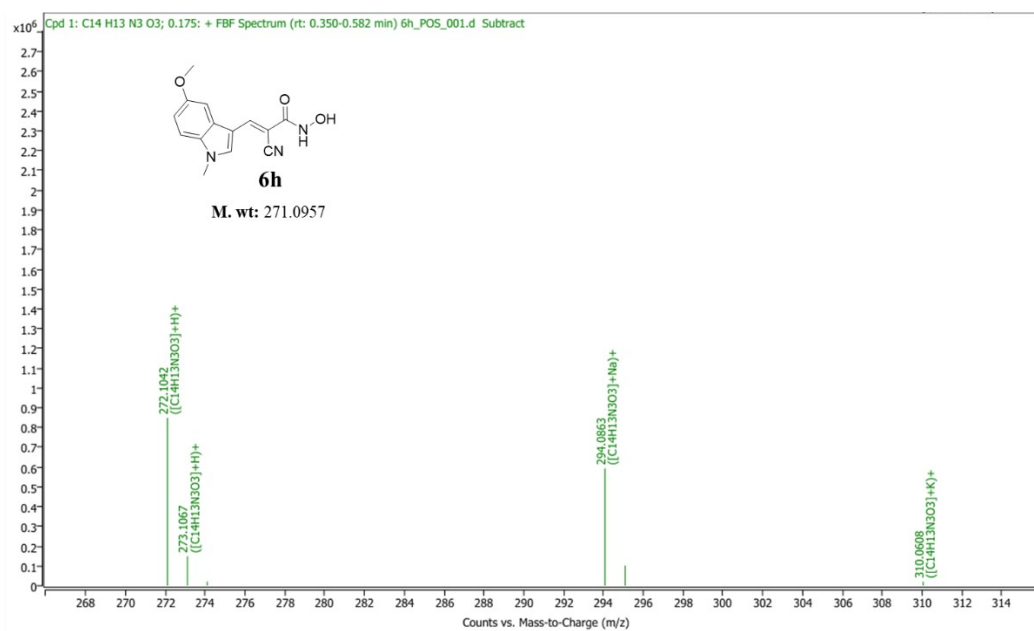

Supporting Spectra S54: HRMS Spectra for the compound 6h.

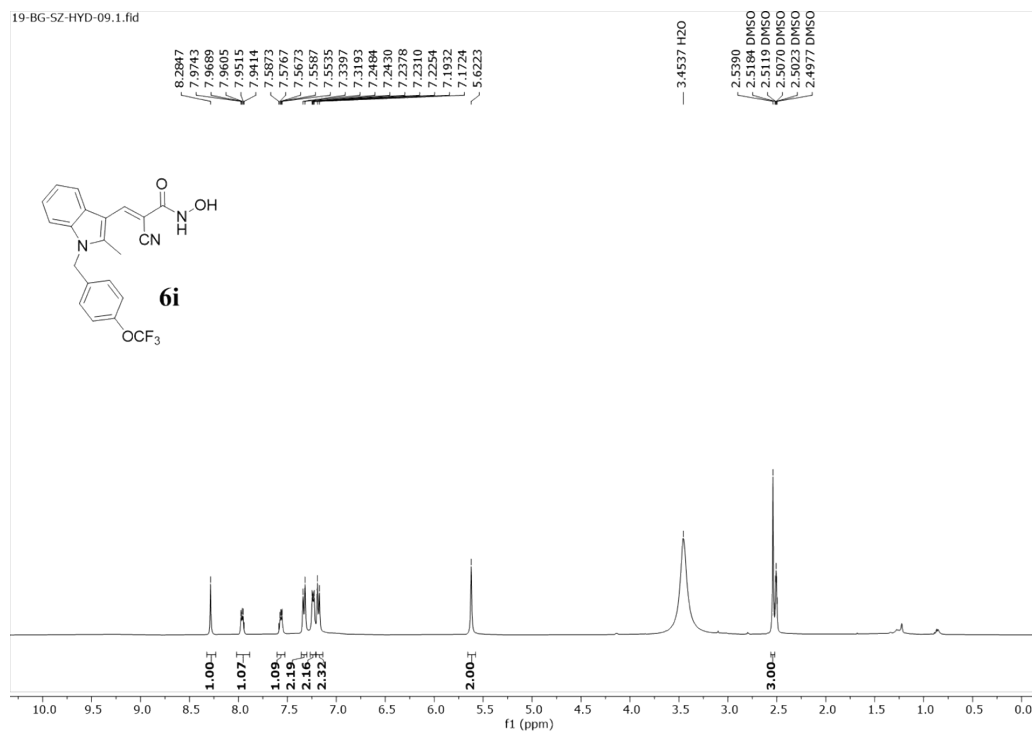

Supporting Spectra S55:  $^1\text{H}$  NMR Spectra for compound **6i**.

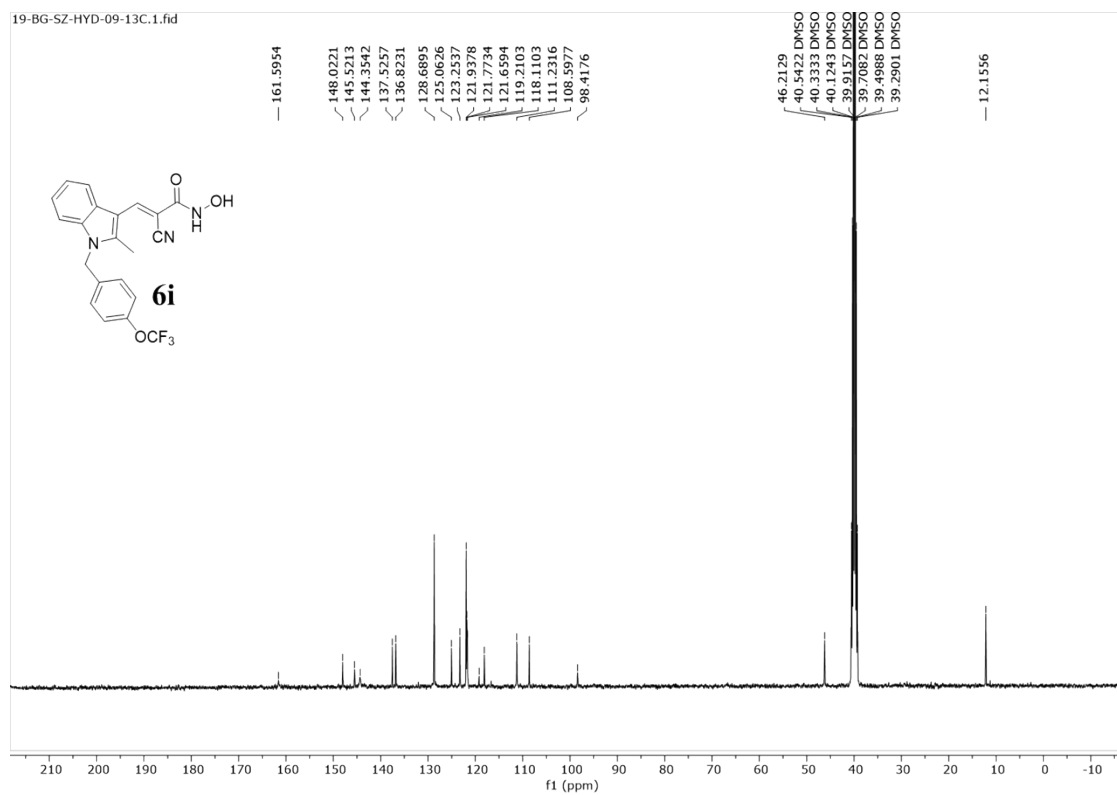

Supporting Spectra S56:  $^{13}\text{C}$  NMR Spectra for compound **6i**.

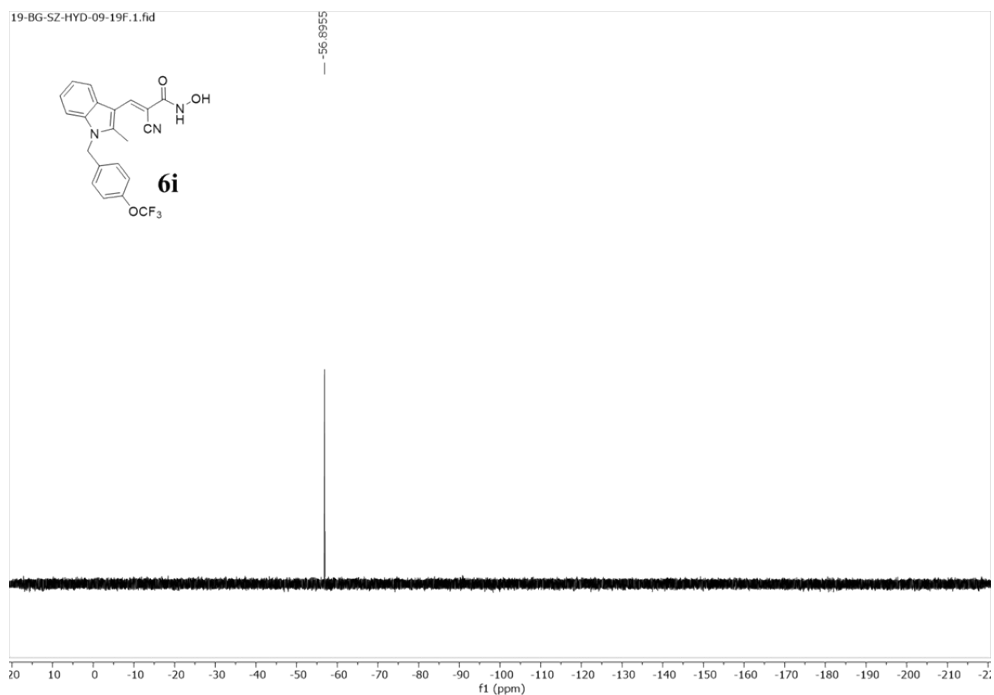

Supporting Spectra S57:  $^{19}\text{F}$  NMR Spectra for compound **6i**.

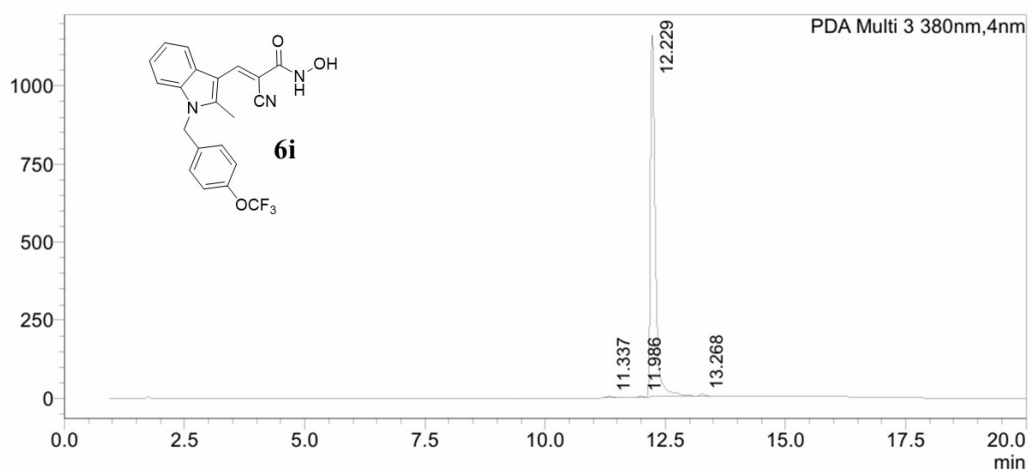

PDA Ch3 380nm

| Peak# | Ret. Time | Area    | Height  | Area%   | Height% |
|-------|-----------|---------|---------|---------|---------|
| 1     | 11.337    | 23484   | 4133    | 0.284   | 0.353   |
| 2     | 11.986    | 11037   | 1874    | 0.134   | 0.160   |
| 3     | 12.229    | 8181903 | 1156904 | 99.100  | 98.953  |
| 4     | 13.268    | 39745   | 6233    | 0.481   | 0.533   |
| Total |           | 8256169 | 1169143 | 100.000 | 100.000 |

Supporting Spectra S58: HPLC traces of compound **6i**.

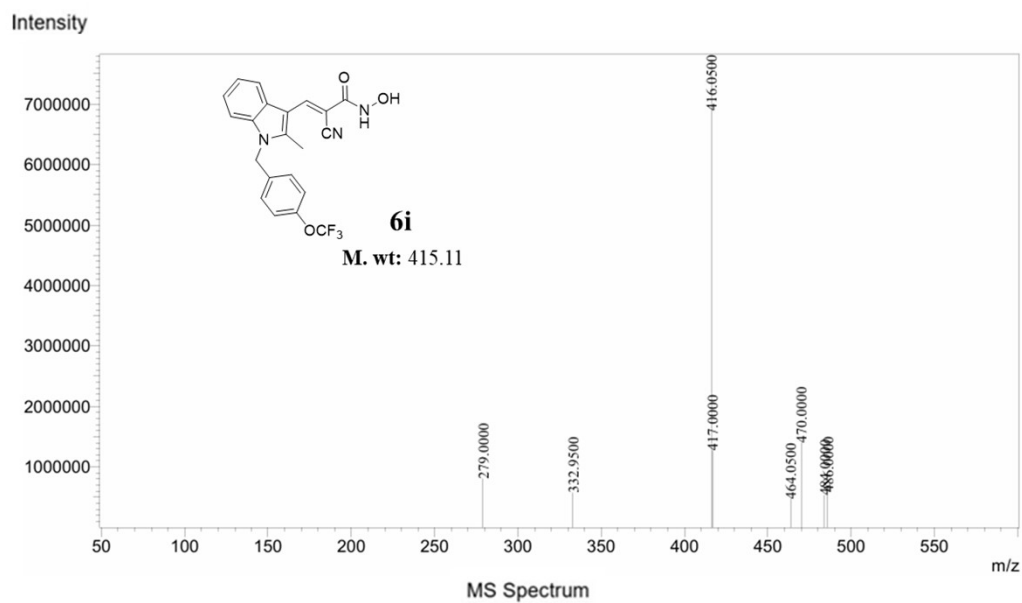

Supporting Spectra S59: LC-MS Spectra for the compound 6i.

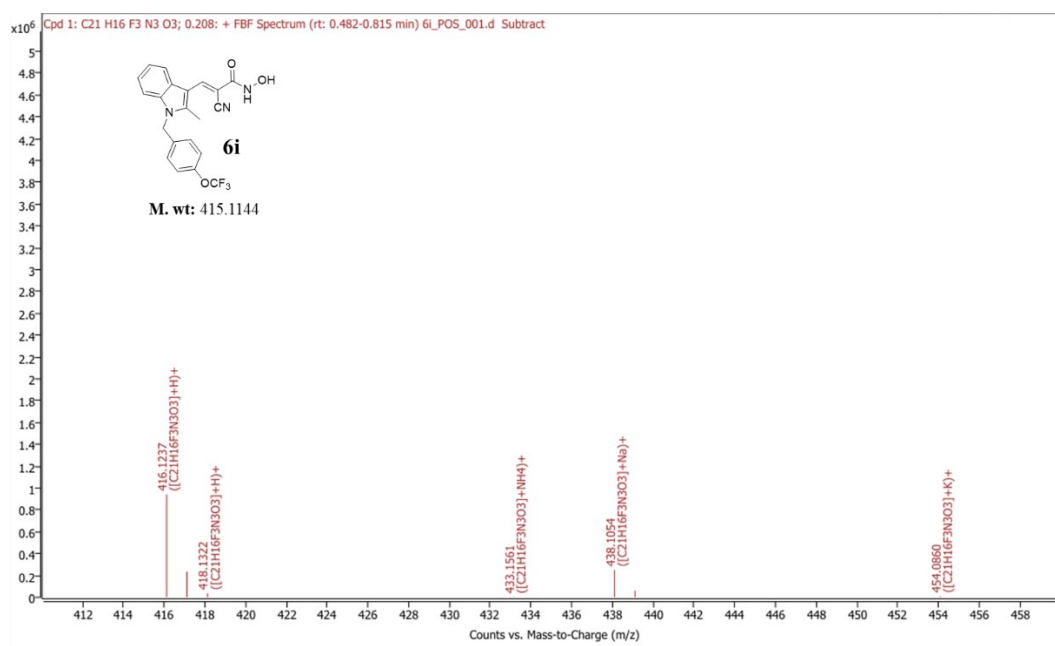

Supporting Spectra S60: HRMS Spectra for the compound 6i.

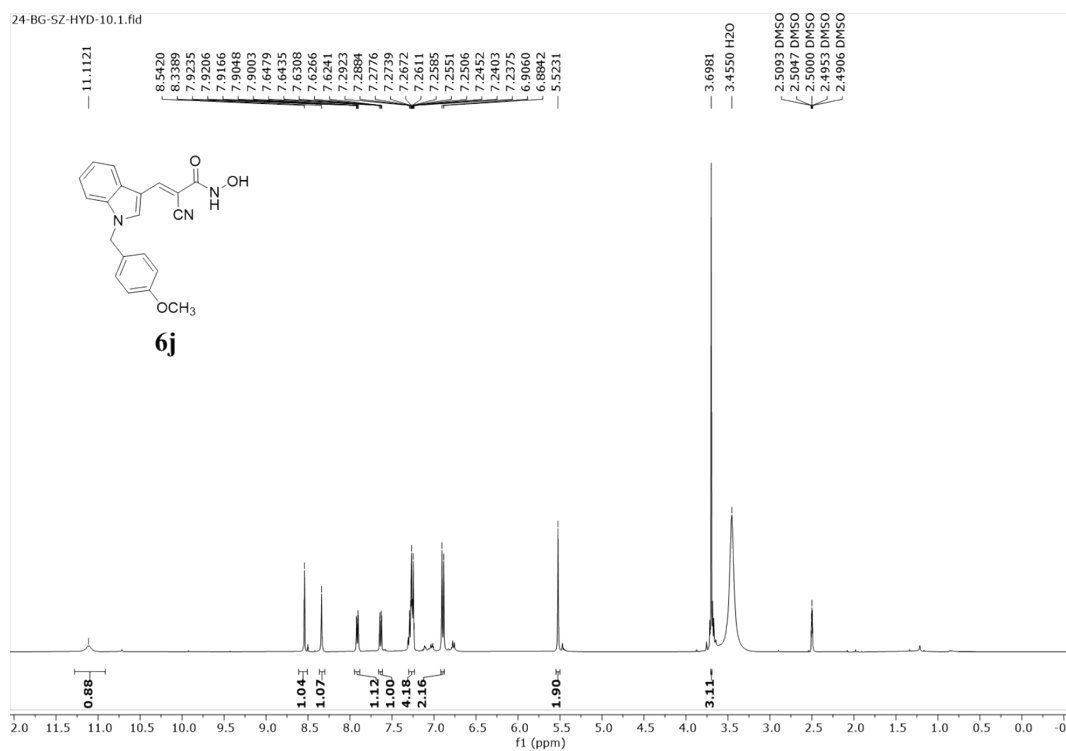

Supporting Spectra S61:  $^1\text{H}$  NMR Spectra for compound **6j**.

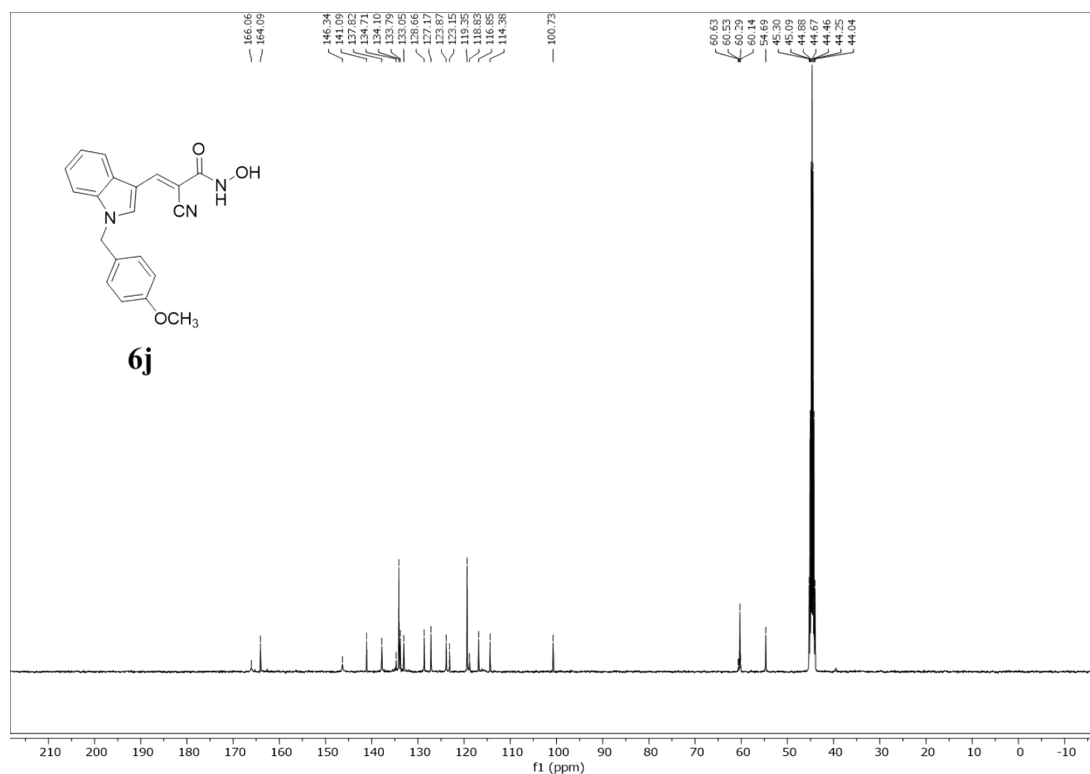

Supporting Spectra S62:  $^{13}\text{C}$  NMR Spectra for compound **6j**.

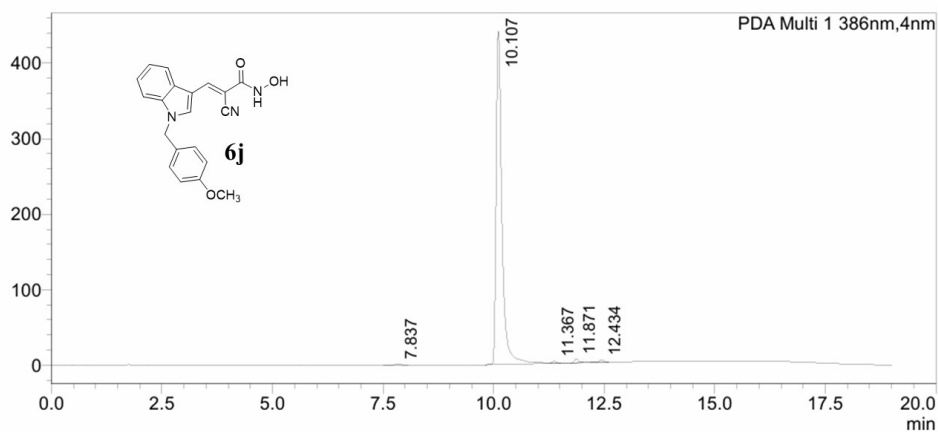

PDA Ch1 386nm

| Peak# | Ret. Time | Area    | Height | Area%   | Height% |
|-------|-----------|---------|--------|---------|---------|
| 1     | 7.837     | 16273   | 1625   | 0.398   | 0.359   |
| 2     | 10.107    | 4001561 | 440828 | 97.959  | 97.302  |
| 3     | 11.367    | 11756   | 1956   | 0.288   | 0.432   |
| 4     | 11.871    | 33856   | 5487   | 0.829   | 1.211   |
| 5     | 12.434    | 21488   | 3153   | 0.526   | 0.696   |
| Total |           | 4084933 | 453049 | 100.000 | 100.000 |

Supporting Spectra S63: HPLC traces of compound 6j.

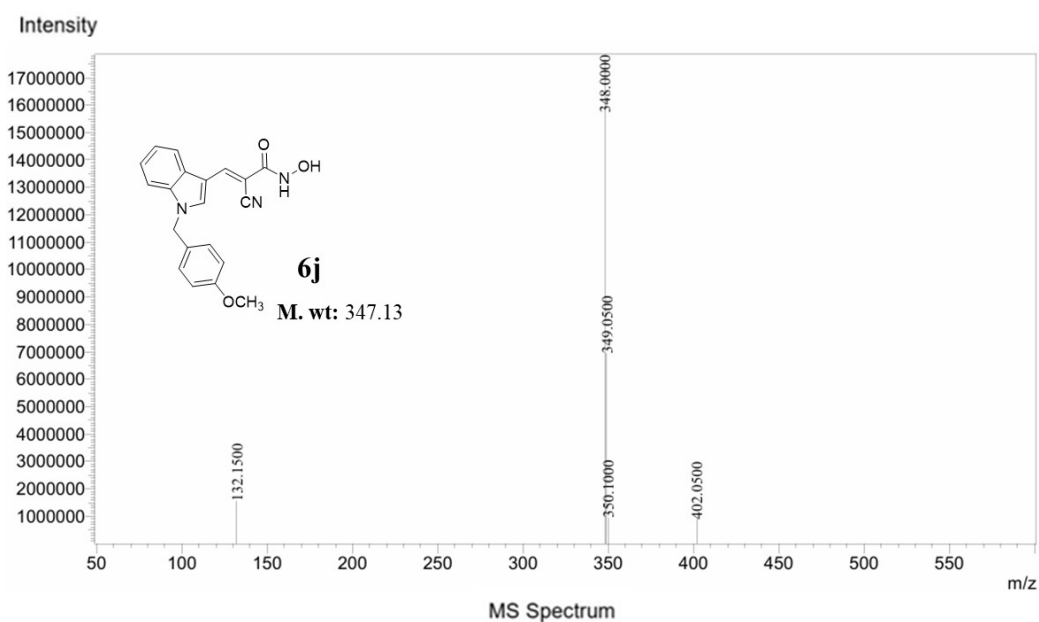

Supporting Spectra S64: LC-MS Spectra for the compound 6j.

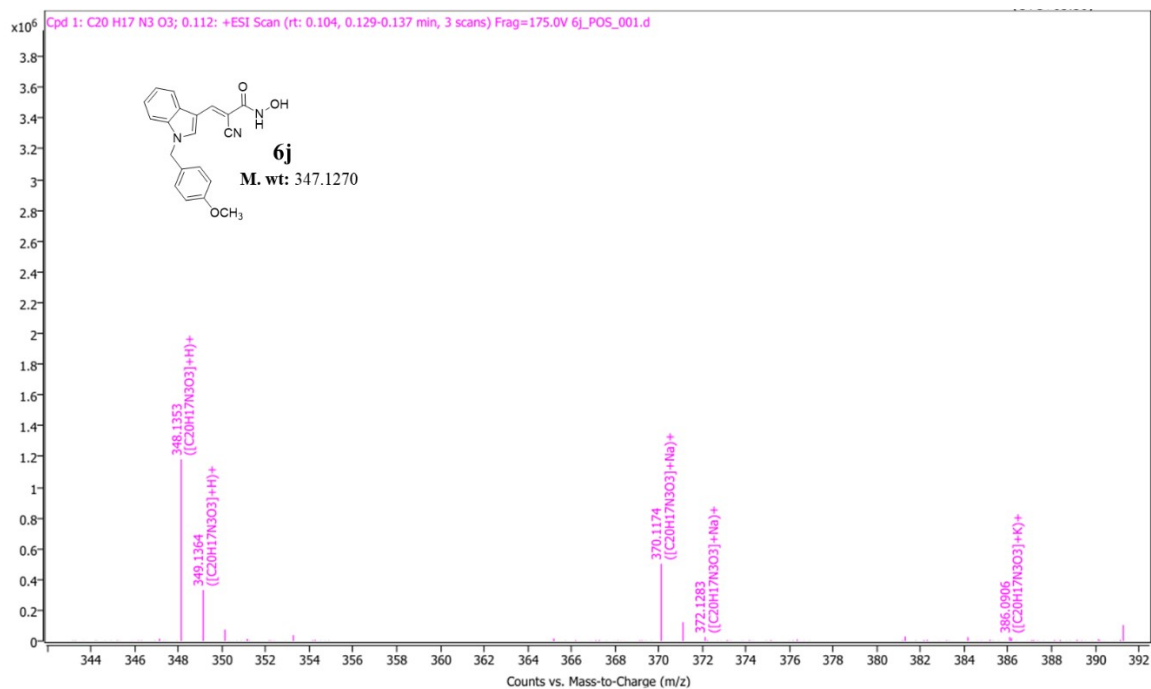

**Supporting Spectra S65: HRMS Spectra for the compound 6j.**

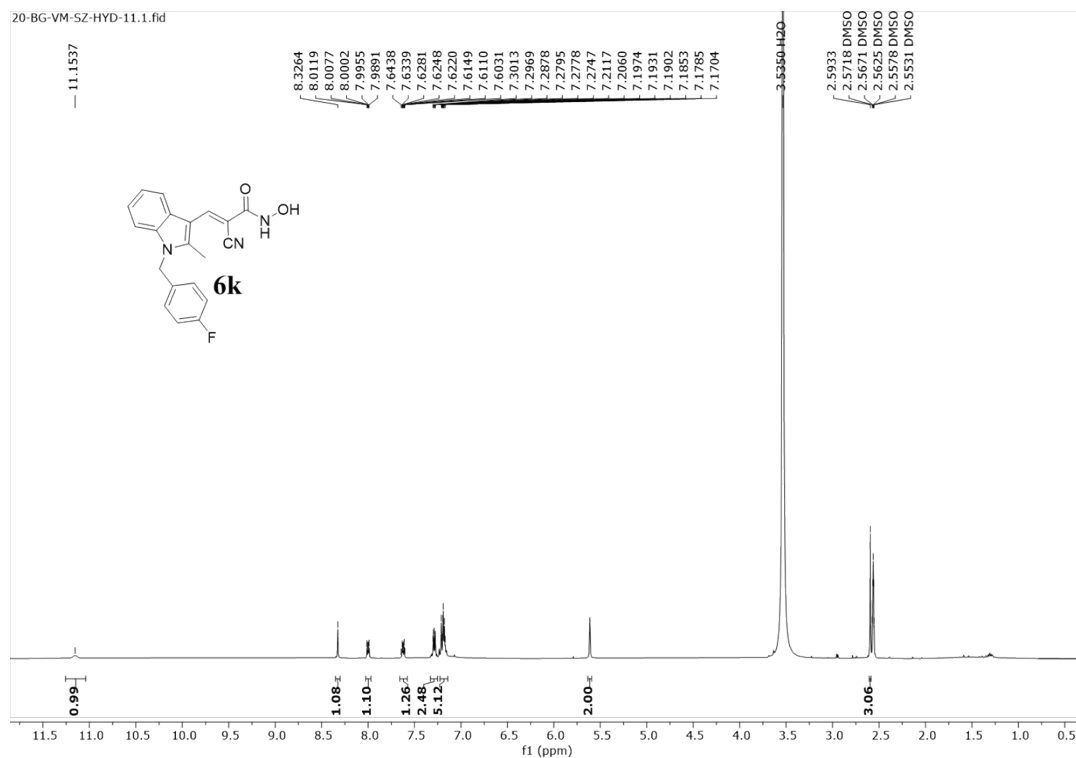

**Supporting Spectra S66: <sup>1</sup>H NMR Spectra for compound 6k**

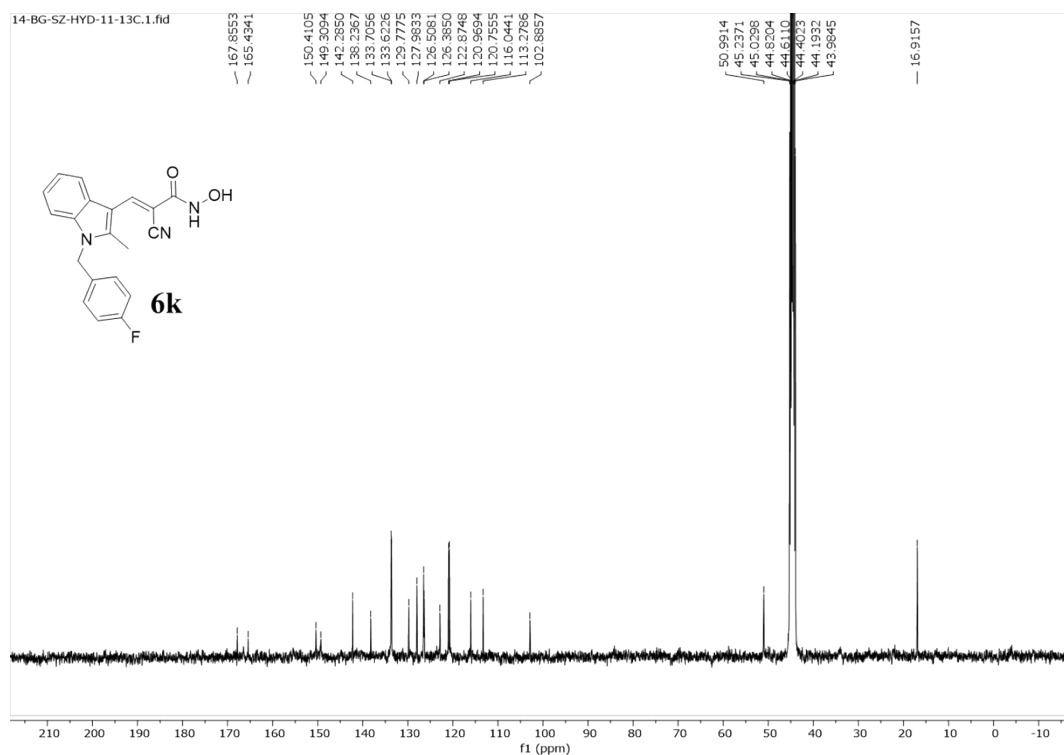

Supporting Spectra S67:  $^{13}\text{C}$  NMR Spectra for compound **6k**

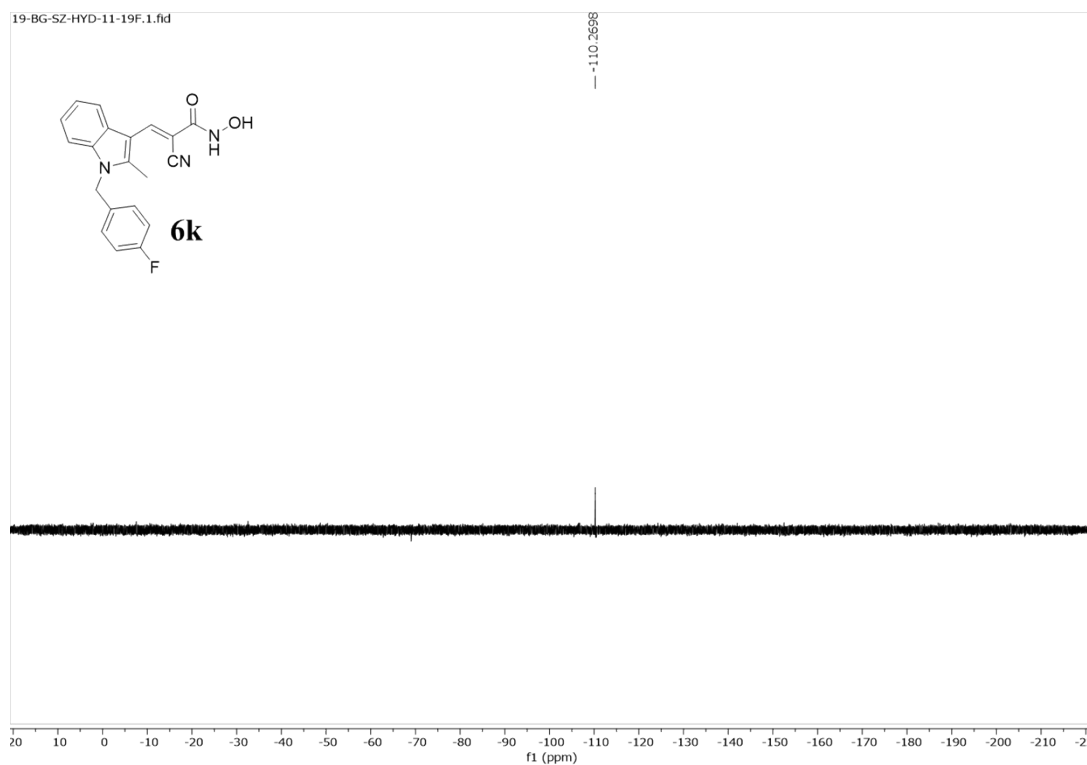

Supporting Spectra S68:  $^{19}\text{F}$  NMR Spectra for compound **6k**

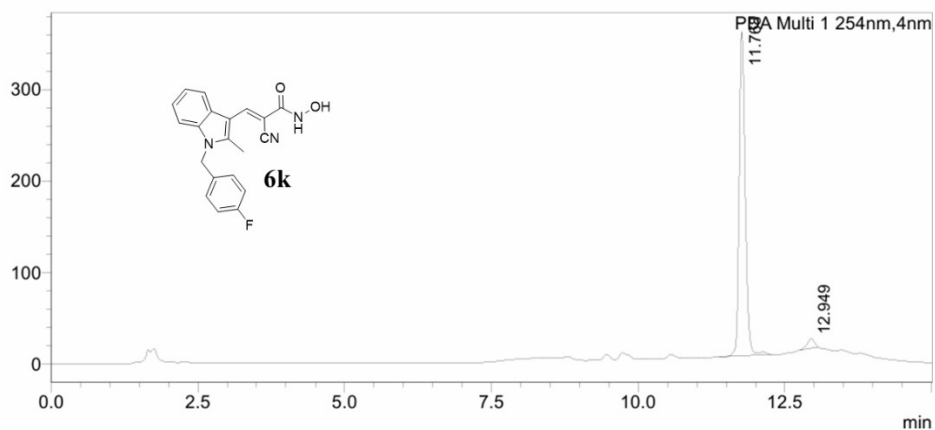

PDA Ch1 254nm

| Peak# | Ret. Time | Area    | Height | Area%   | Height% |
|-------|-----------|---------|--------|---------|---------|
| 1     | 11.768    | 2556600 | 354432 | 96.728  | 97.114  |
| 2     | 12.949    | 86485   | 10533  | 3.272   | 2.886   |
| Total |           | 2643085 | 364965 | 100.000 | 100.000 |

Supporting Spectra S69: HPLC traces of compound 6k.

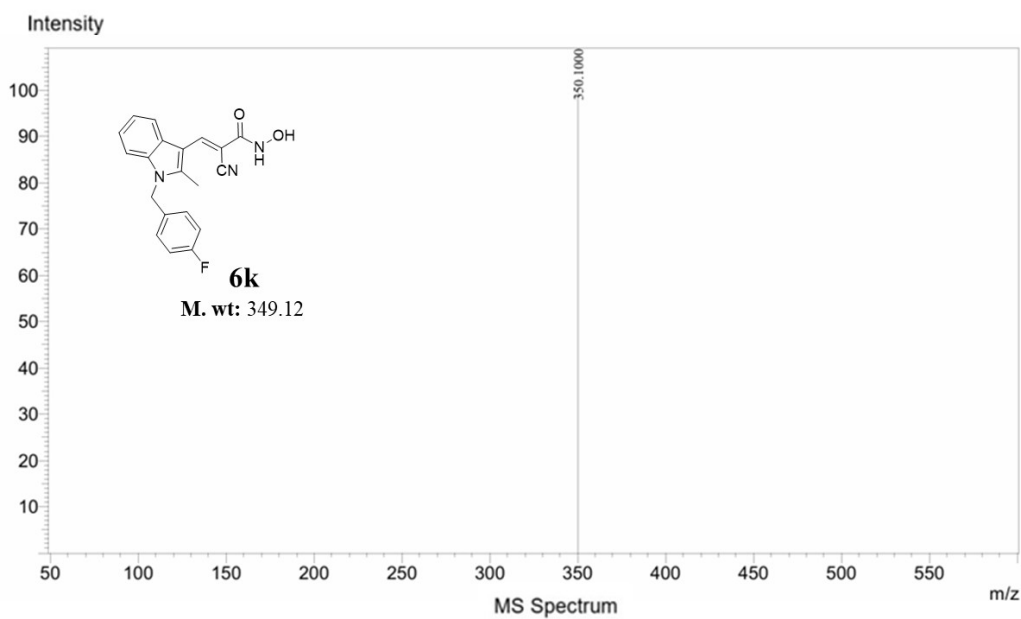

Supporting Spectra S70: LC-MS Spectra for the compound 6k.



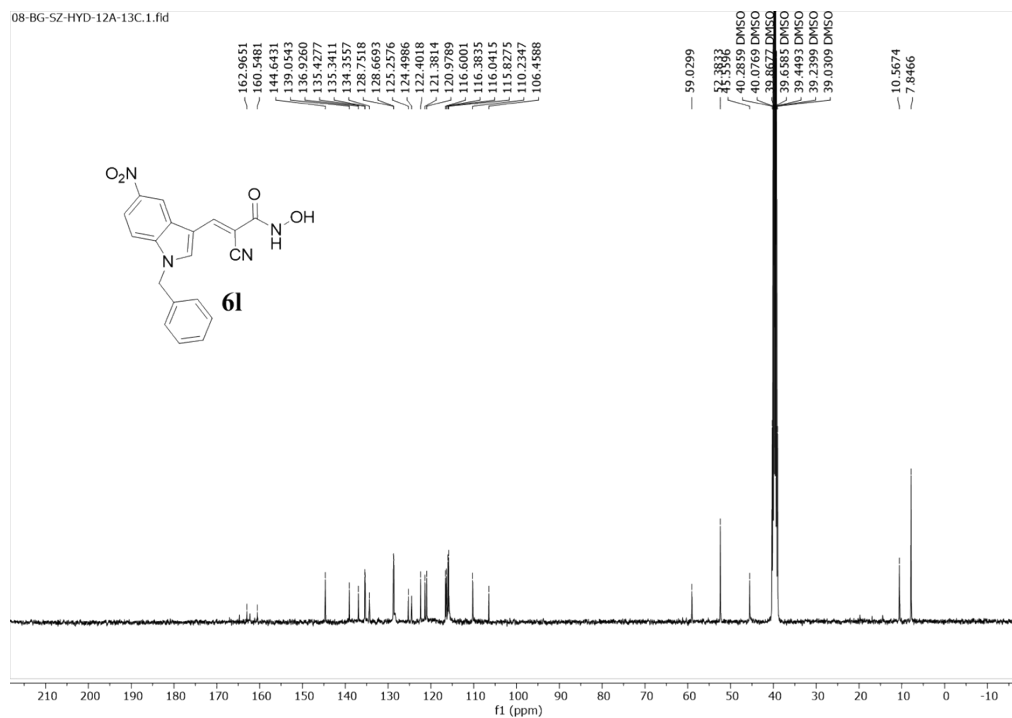

### Supporting Spectra S73: <sup>13</sup>C NMR Spectra for compound 6l.

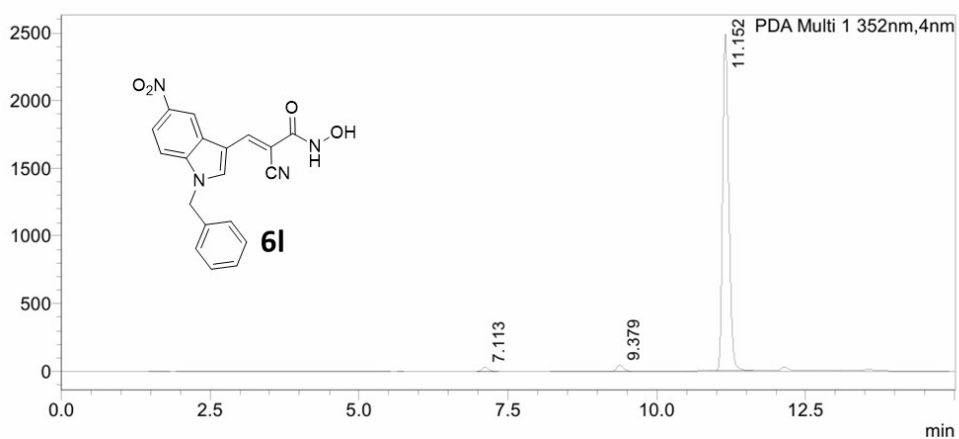

PDA Ch1 352nm

| Peak# | Ret. Time | Area     | Height  | Area%   | Height% | Tailing Factor |
|-------|-----------|----------|---------|---------|---------|----------------|
| 1     | 7.113     | 216705   | 30923   | 1.193   | 1.209   | 1.195          |
| 2     | 9.379     | 298783   | 43133   | 1.645   | 1.687   | 1.250          |
| 3     | 11.152    | 17649084 | 2483411 | 97.162  | 97.104  | 1.234          |
| Total |           | 18164572 | 2557467 | 100.000 | 100.000 |                |

### Supporting Spectra S74: HPLC traces of compound 6l.

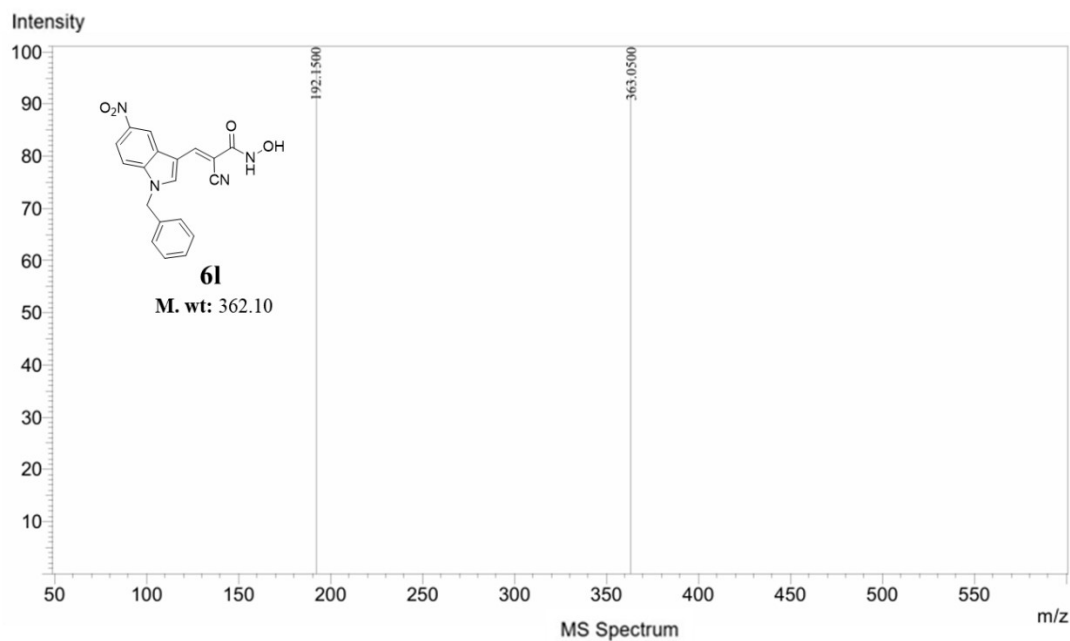

### Supporting Spectra S75: LC-MS Spectra for the compound 6l.

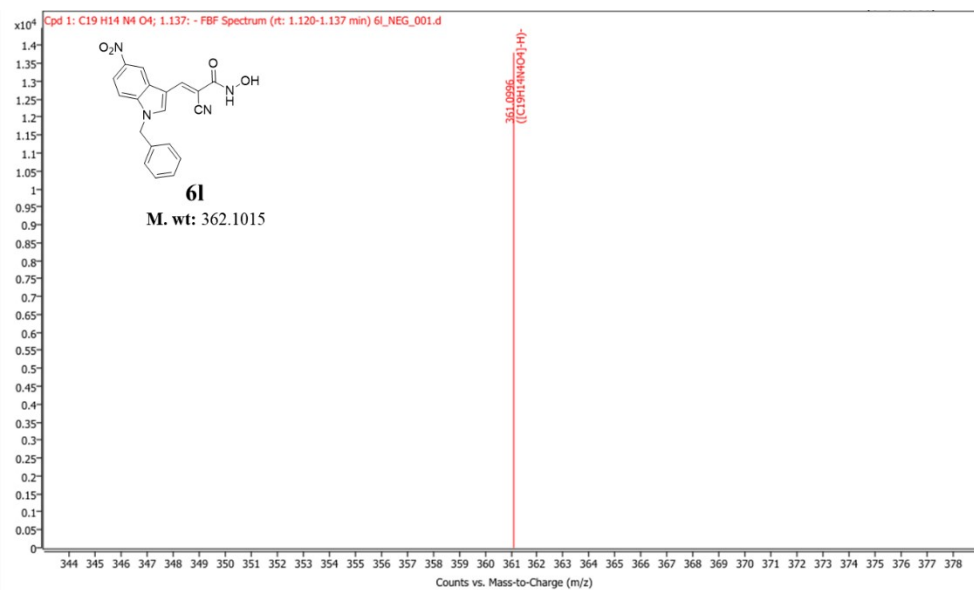

### Supporting Spectra S76: HRMS Spectra for the compound 6l.
